# Supplementary material for: Visible-light-driven reductive dearomatization ofN-arylformyl indoles in EDA complexes with a thiophenolviaa HAT pathway
Source: Royal Society of Chemistry journal article supplement (doi:10.1039/d2qo02024f), 2023-01-01

*Electronic Supplementary Information (ESI) for*

## **Visible-light-driven reductive dearomatization of *N*-arylformyl indoles in EDA complexes with a thiophenol via a HAT pathway**

Yi-Ping Cai, Meng-Yue Ma, Xiao Xu and Qin-Hua Song\*

Department of Chemistry, University of Science and Technology of China, Hefei 230026, P. R. China.

E-mail: qhsong@ustc.edu.cn

### **Contents**

|                                                                                   |         |
|-----------------------------------------------------------------------------------|---------|
| 1. Materials and general methods.....                                             | S2      |
| 2. Condition optimization and all substrates of the dearomatization reaction..... | S3-4    |
| 3. Mechanistic investigations.....                                                | S5      |
| 3.1 Cyclic voltammetry (CV) measurements.....                                     | S5      |
| 3.2 UV-vis absorption spectra as evidence of the EDA complex .....                | S6      |
| 3.3 NMR measurements.....                                                         | S7      |
| 3.4 Free radical-trapping experiments.....                                        | S8-9    |
| 3.5 Benzyl anion-trapping experiments.....                                        | S10-11  |
| 3.6 Deuterium experiments.....                                                    | S11-13  |
| 3.7 NOE analysis of the major isomer of <b>24</b> .....                           | S14     |
| 4. Experimental procedures.....                                                   | S15     |
| 4.1 Synthesis of substrates.....                                                  | S15     |
| 4.2 Photomediated dearomatization reaction.....                                   | S16     |
| 4.3 Product derivatization.....                                                   | S17     |
| 5. Synthesis and characterization of starting materials.....                      | S19-33  |
| 6. Synthesis and characterization of dearomative products.....                    | S34-46  |
| 7. References.....                                                                | S47     |
| 8. X-ray crystal structure data of compounds <b>R1a</b> and <b>1</b> .....        | S48-49  |
| 9. NMR spectra of related compounds.....                                          | S50-150 |

## 1. Materials and general methods

All aryl thiols and solvents were obtained from commercial suppliers and used without further purification unless otherwise stated. Anhydrous DMSO was purchased from Energy Chemical, and added to molecular sieves during use and stored at room temperature. The  $^1\text{H}$  and  $^{13}\text{C}$   $\{^1\text{H}\}$  NMR spectra were recorded on a Bruker Ascend 400MHz spectrometer (400 MHz for  $^1\text{H}$  NMR, 100 MHz for  $^{13}\text{C}$  NMR) or on a Bruker Ascend 500MHz spectrometer (500 MHz for  $^1\text{H}$  NMR, 125 MHz for  $^{13}\text{C}$  NMR). The chemical shifts ( $\delta$ ) for  $^1\text{H}$  and  $^{13}\text{C}$  are reported in ppm and are referenced to  $\text{Me}_4\text{Si}$  (TMS) and the residual undeuterated solvent resonances (TMS at 0.00 ppm;  $\text{CHCl}_3$  at 7.26 ppm  $^1\text{H}$  NMR and 77.16 ppm  $^{13}\text{C}$  NMR respectively; DMSO at 2.50 ppm  $^1\text{H}$  NMR and 39.52 ppm  $^{13}\text{C}$  NMR respectively). All UV/Vis absorption spectra were recorded in 1 cm path quartz cuvettes on a Shimadzu UV-2450 UV-VIS spectrophotometer. High resolution mass spectra (HRMS) were acquired using a Q-Exactive plus hybrid quadrupole-orbitrap mass spectrometer (Q-Orbitrap MS) (Thermo Scientific, San Jose, USA) with electrospray ionization (ESI) source. A 40 W Kessil PR160L-456 nm LED photoreaction lighting (max frequency, max intensity) was employed as a visible light source without the use of filters.

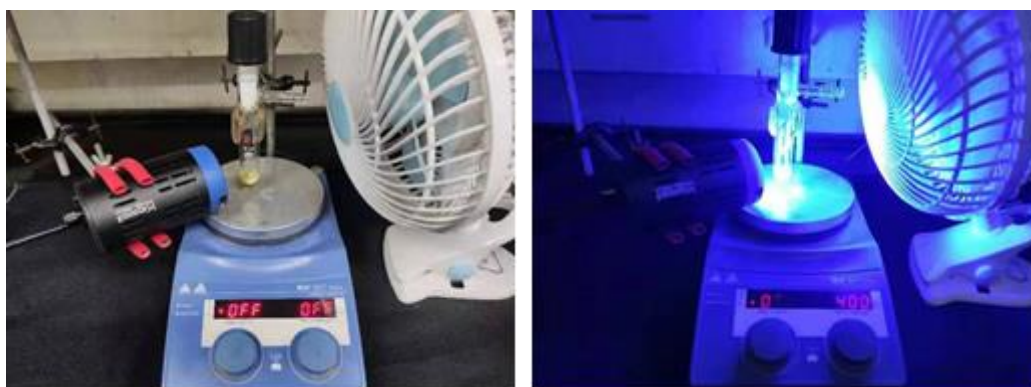

**Figure S1.** The photo reaction setup with a 40 W Kessil PR160L-456 nm LED photoreaction lighting and a fan.

## 2. Condition optimization and all substrates of the dearomatization reaction

**Table S1.** Optimization of the conditions

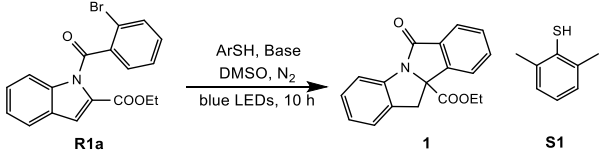

| Entry           | ArSH (equiv)                       | Base (equiv)                          | Yield % <sup>a</sup> |
|-----------------|------------------------------------|---------------------------------------|----------------------|
| 1               | <b>S1</b> (1.5)                    | Cs <sub>2</sub> CO <sub>3</sub> (1.5) | 54                   |
| 2               | <b>S1</b> (1.5)                    | K <sub>2</sub> CO <sub>3</sub> (1.5)  | 60                   |
| 3               | <b>S1</b> (1.5)                    | Na <sub>2</sub> CO <sub>3</sub> (1.5) | 54                   |
| 4               | <b>S1</b> (1.5)                    | DBU (1.5)                             | 22                   |
| 5               | <b>S1</b> (1.5)                    | DBU (0.5)                             | 45                   |
| 6               | <b>S1</b> (1.5)                    | DBU (0.2)                             | 25                   |
| 7               | <b>S1</b> (1.5)                    | NEt <sub>3</sub> (1.5)                | 96                   |
| 8               | <b>S1</b> (1.5)                    | DIPEA (1.5)                           | 96                   |
| 9               | <b>S1</b> (1.5)                    | DIPEA (1.0)                           | 83                   |
| 10              | <b>S1</b> (1.5)                    | DIPEA (0.8)                           | 80                   |
| 11              | <b>S1</b> (1.0)                    | DIPEA (1.5)                           | 79                   |
| 12              | <b>S1</b> (0.8)                    | DIPEA (1.5)                           | 77                   |
| 13              | <b>S1</b> (0.4)                    | DIPEA (1.5)                           | 68                   |
| 14              | 1.5 eq <i>p</i> -Me-               | 1.5 eq DIPEA                          | 97                   |
| 15              | 1.5 eq <i>p</i> -MeO-              | 1.5 eq DIPEA                          | 85                   |
| 16              | 1.5 eq <i>p</i> -H-                | 1.5 eq DIPEA                          | 97                   |
| 17              | 1.5 eq <i>p</i> -F-                | 1.5 eq DIPEA                          | 94                   |
| 18              | 1.5 eq <i>p</i> -CF <sub>3</sub> - | 1.5 eq DIPEA                          | 92                   |
| 19              | None                               | DIPEA (1.5)                           | ND                   |
| 20              | <b>S1</b> (1.5)                    | None                                  | ND                   |
| 21 <sup>b</sup> | <b>S1</b> (1.5)                    | DIPEA (1.5)                           | ND                   |

<sup>a</sup> Reaction conditions: 0.1 mmol **R1a** in 1.0 mL of DMSO (0.1M), irradiation with a blue LED (456 nm, 40W, Kessil® lighting) for 10 h at room temperature, and yields were determined by <sup>1</sup>H NMR analysis using 1,3,5-trimethoxybenzene as internal standards. <sup>b</sup> In dark. ND, not detected.

**Table S2.** Structures of all substrates in the dearomatization reaction.

|                                                                                                                            |                                                                                             |                                          |                                          |                                                                                                                                                                                                                                         |                            |
|----------------------------------------------------------------------------------------------------------------------------|---------------------------------------------------------------------------------------------|------------------------------------------|------------------------------------------|-----------------------------------------------------------------------------------------------------------------------------------------------------------------------------------------------------------------------------------------|----------------------------|
|                                                                                                                            |                                                                                             |                                          |                                          |                                                                                                                                                                                                                                         |                            |
| R1a: X = Br<br>R1b: X = Cl<br>R1c: X = I                                                                                   | R2a: X = Br<br>R2b: X = Cl<br>R2c: X = I                                                    | R3a: X = Br<br>R3b: X = Cl<br>R3c: X = I | R4a: X = Br<br>R4b: X = Cl<br>R4c: X = I | R5a: X = Br<br>R5b: X = Cl                                                                                                                                                                                                              | R6a: X = Br<br>R6b: X = Cl |
|                                                                                                                            |                                                                                             |                                          |                                          |                                                                                                                                                                                                                                         |                            |
| R7                                                                                                                         | R8                                                                                          | R9                                       | R10                                      | R11                                                                                                                                                                                                                                     | R12                        |
|                                                                                                                            |                                                                                             |                                          |                                          |                                                                                                                                                                                                                                         |                            |
| R13                                                                                                                        | R14                                                                                         | R15                                      | R16                                      | R17                                                                                                                                                                                                                                     |                            |
|                                                                                                                            |                                                                                             |                                          |                                          |                                                                                                                                                                                                                                         |                            |
| R18                                                                                                                        | R19: R <sup>3</sup> = H<br>R20: R <sup>3</sup> = F<br>R21: R <sup>3</sup> = CF <sub>3</sub> | R22                                      | R23                                      |                                                                                                                                                                                                                                         |                            |
|                                                                                                                            |                                                                                             |                                          |                                          | R24                                                                                                                                                                                                                                     | R25                        |
|                                                                                                                            |                                                                                             |                                          |                                          |                                                                                                                                                                                                                                         |                            |
| R26: R <sup>1</sup> = F<br>R27: R <sup>1</sup> = CH <sub>3</sub><br>R28: R <sup>1</sup> = OBn<br>R29: R <sup>1</sup> = EtO |                                                                                             | R30                                      | R31                                      |                                                                                                                                                                                                                                         |                            |
|                                                                                                                            |                                                                                             |                                          |                                          | R32: R <sup>3</sup> = F<br>R33: R <sup>3</sup> = Cl<br>R34: R <sup>3</sup> = Br<br>R35: R <sup>3</sup> = I<br>R36: R <sup>3</sup> = CF <sub>3</sub><br>R37: R <sup>3</sup> = CH <sub>3</sub><br>R38: R <sup>3</sup> = CH <sub>3</sub> O |                            |
|                                                                                                                            |                                                                                             |                                          |                                          |                                                                                                                                                                                                                                         |                            |
| R39                                                                                                                        | R40                                                                                         | R41                                      | R42                                      |                                                                                                                                                                                                                                         |                            |
| extra unsuccessful substrates                                                                                              |                                                                                             |                                          |                                          |                                                                                                                                                                                                                                         |                            |
|                                                                                                                            |                                                                                             |                                          |                                          |                                                                                                                                                                                                                                         |                            |
|                                                                                                                            |                                                                                             |                                          |                                          |                                                                                                                                                                                                                                         |                            |

### 3. Mechanistic investigations

#### 3.1 Cyclic voltammetry (CV) measurements

CV measurements were carried out under nitrogen atmosphere in DMSO solutions with 0.1 M of tetrabutylammonium tetrafluoroborate ( $\text{Bu}_4\text{NBF}_4$ ) as a supporting electrolyte. Measurements were made with a glassy carbon electrode, saturated calomel electrode (SCE) as reference electrode, and a Pt wire counter electrode. The concentration of the sample solution was fixed at 10 mM and the sweep rates were set to 100 mV/s. The redox potential of ferrocenium/ferrocene ( $\text{Fc}^+/\text{Fc}$ ) was measured under same experimental conditions.

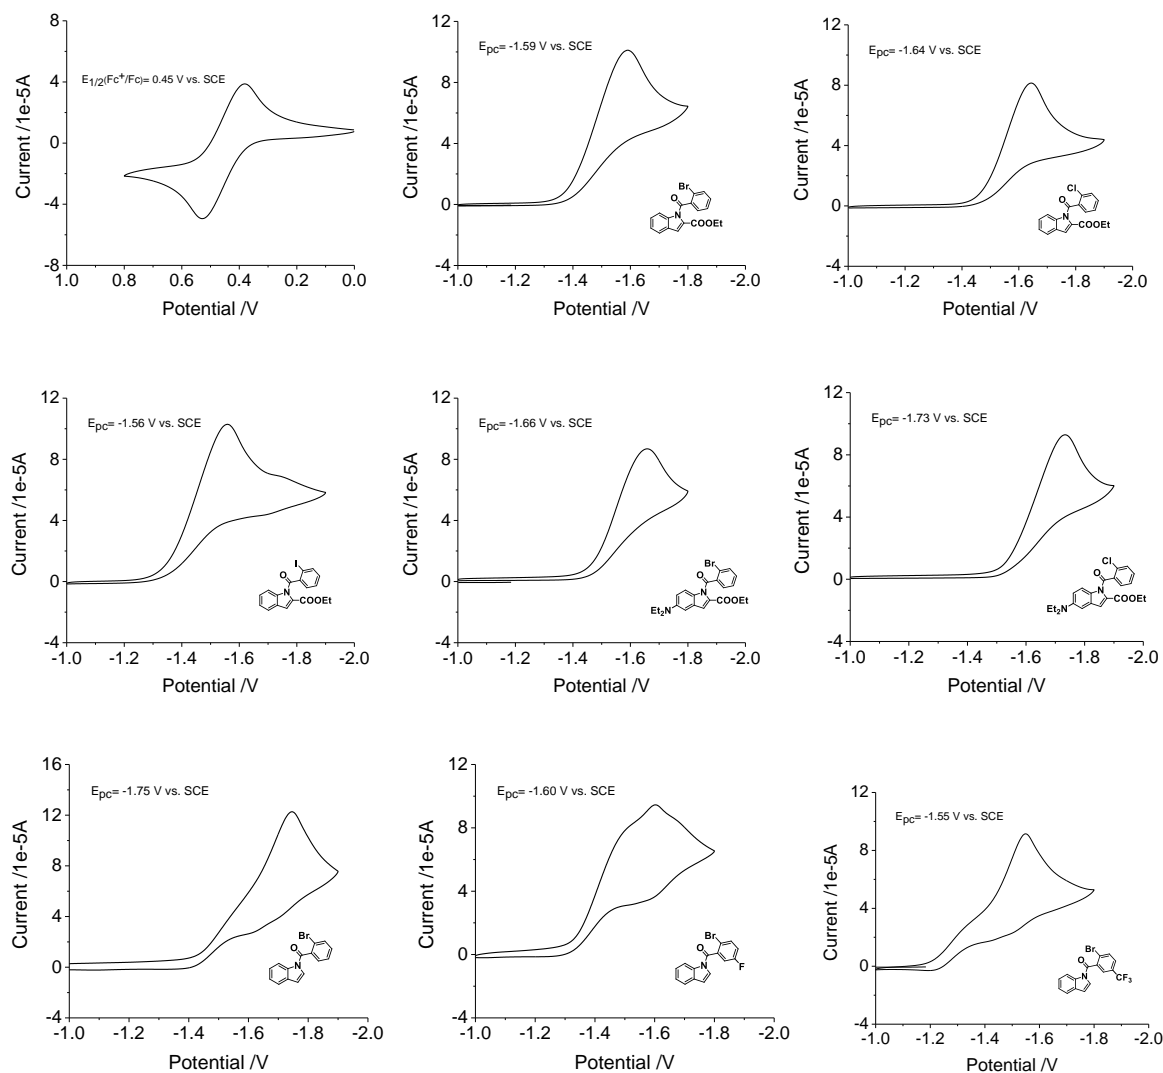

**Figure S2.** Cyclic voltammograms of ferrocene, **R1a**, **R1b**, **R1c**, **R5a**, **R5b**, **R19**, **R20** and **R21**.  $E_{1/2}(\text{Fc}^+/\text{Fc})$  (V vs. SCE) = 0.45 V.

### 3.2 UV-vis absorption spectra as evidence of the EDA complex

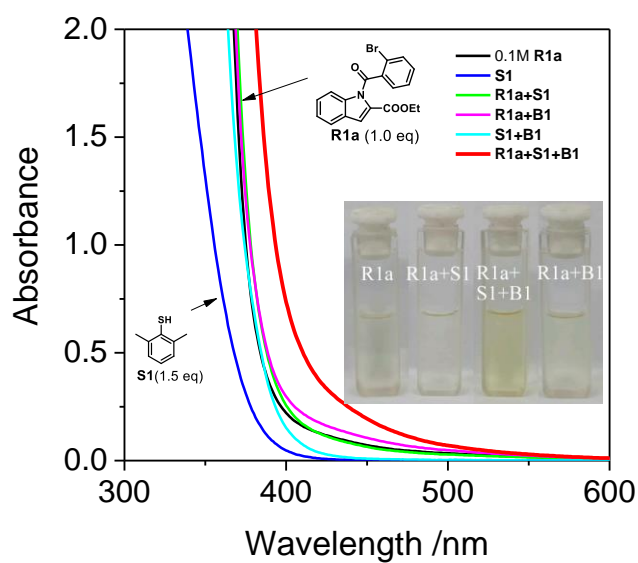

**Figure S3.** UV/Vis absorption spectra of **R1a**, **S1** (1.5 equiv) and **DIPEA (B1)**, 1.5 equiv) in DMSO (0.1M). Inset: photos of above solutions.

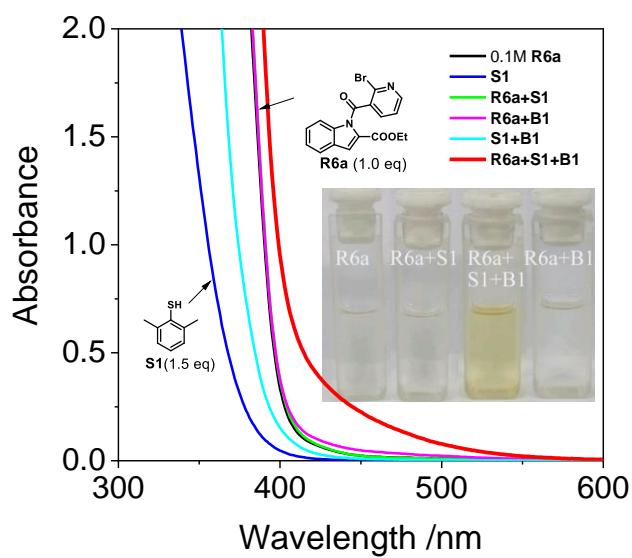

**Figure S4.** UV/Vis absorption spectra of **R6a**, **S1** (1.5 equiv) and **DIPEA (B1)**, 1.5 equiv) in DMSO (0.1M). Inset: photos of above solutions.

### 3.3 NMR measurements

Mixture of a certain amount of substrate **R32** with increasing amount of thiophenol and the corresponding concentration of DIPEA is analyzed in DMSO-*d*<sub>6</sub> by <sup>19</sup>F-NMR. The chemical shift  $\delta$  (Ar-F) of the F atom of substrate **R32** gradually moved downfield with the increase of ArS<sup>-</sup> concentration, indicating that there was an interaction between **R32** and thiophenol anion.<sup>S1</sup>

**Table S3.** <sup>19</sup>F-NMR measurements of **R32** with **S1** and DIPEA.

| Entry | <b>R32</b> /mmol | <b>S1</b> /mmol | DIPEA /mmol | <b>R32</b> : <b>S1</b> : DIPEA | $\delta$ (Ar-F)/ppm |
|-------|------------------|-----------------|-------------|--------------------------------|---------------------|
| 1     | 0.01             | 0               | 0           | 1:0:0                          | -113.5027           |
| 2     | 0.01             | 0.02            | 0.02        | 1:2:2                          | -113.4923           |
| 3     | 0.01             | 0.04            | 0.04        | 1:4:4                          | -113.4888           |
| 4     | 0.01             | 0.06            | 0.06        | 1:6:6                          | -113.4849           |
| 5     | 0.01             | 0.08            | 0.08        | 1:8:8                          | -113.4808           |
| 6     | 0.01             | 0.10            | 0.10        | 1:10:10                        | -113.4779           |

Mixture of a certain amount of substrate **R38** with increasing amount of thiophenol and the corresponding concentration of DIPEA is analyzed in DMSO-*d*<sub>6</sub> by <sup>1</sup>H-NMR. The chemical shift  $\delta$  (MeO-) of the H atom of substrate **R38** gradually moved upfield with the increase of ArS<sup>-</sup> concentration, indicating that there was an interaction between **R38** and thiophenol anion, which further supported the formation of EDA in this system.<sup>S2</sup>

**Table S4.** <sup>1</sup>H-NMR measurements of **R38** with **S1** and DIPEA.

| Entry | <b>R38</b> /mmol | <b>S1</b> /mmol | DIPEA /mmol | <b>R38</b> : <b>S1</b> : DIPEA | $\delta$ (MeO-)/ppm |
|-------|------------------|-----------------|-------------|--------------------------------|---------------------|
| 1     | 0.01             | 0               | 0           | 1:0:0                          | 3.7720              |
| 2     | 0.01             | 0.02            | 0.02        | 1:2:2                          | 3.7692              |
| 3     | 0.01             | 0.04            | 0.04        | 1:4:4                          | 3.7663              |
| 4     | 0.01             | 0.06            | 0.06        | 1:6:6                          | 3.7642              |
| 5     | 0.01             | 0.08            | 0.08        | 1:8:8                          | 3.7618              |
| 6     | 0.01             | 0.10            | 0.10        | 1:10:10                        | 3.7597              |
| 7     | 0.01             | 0.12            | 0.12        | 1:12:12                        | 3.7575              |

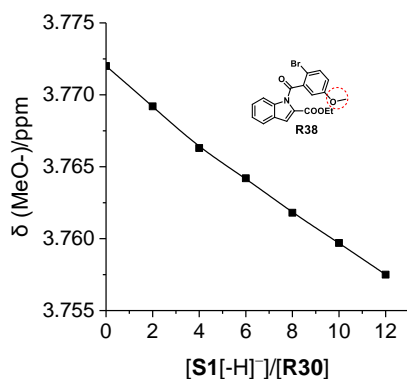

**Figure S5.** The plot of the chemical shift of H atom in CH<sub>3</sub>O group of the concentration ratio of **R38** and **S1**[-H]<sup>-</sup>.

### 3.4 Free radical-trapping experiments

The substrate **R1a** (0.2 mmol, 1.0 eq.) and TEMPO (3.0 eq.) were added to a 10 mL transparent Schlenk tube equipped with a stirring bar. The tube was evacuated and refilled with nitrogen (N<sub>2</sub>) three times. Then DMSO (2 mL), DIPEA (1.5 eq.), and **S2** (1.5 eq.) were added via a gastight syringe under nitrogen atmosphere. Afterwards, the tube was sealed, and the reaction mixture was stirred under irradiation with blue LED (456 nm, distance approximately 3.0 cm from the bulb) with a fan at room temperature for 10 h. The reaction mixture was analyzed by HRMS with ESI source, no desired product **1** was detected, indicating that the reaction was completely inhibited by TEMPO. Meanwhile, free radical-trapping adduct of benzyl radical intermediate with TEMPO was observed with HRMS analysis of the reaction solution at  $m/z$  449.2433 (Figure S6). The reaction mixture was extracted with DCM (3×10 mL) and washed with water to remove DMSO. The organic layers were combined and concentrated under vacuum. The free radical-trapping adduct **43**<sup>S3</sup> of benzyl radical intermediate with TEMPO was purified by flash column chromatography (petroleum ether/ethyl acetate v/v =20:1) yielding a colorless oil in 11%. <sup>1</sup>H NMR (500 MHz, CDCl<sub>3</sub>)  $\delta$  7.88 (d,  $J$  = 7.6 Hz, 1H), 7.81 (d,  $J$  = 7.7 Hz, 1H), 7.74 (d,  $J$  = 7.8 Hz, 1H), 7.65 (td,  $J$  = 7.5 Hz, 1.1 Hz, 1H), 7.60 (d,  $J$  = 7.3 Hz, 1H), 7.54 (td,  $J$  = 7.6 Hz, 0.9 Hz, 1H), 7.43 (td,  $J$  = 7.7 Hz, 1.2 Hz, 1H), 5.73 (s, 1H), 4.12 (q,  $J$  = 7.1 Hz, 2H), 1.47 (s, 3H), 1.40-1.37 (m, 2H), 1.25 (d,  $J$  = 5.8 Hz, 1H), 1.20 (t,  $J$  = 7.1 Hz, 1H), 1.15 (t,  $J$  = 7.1 Hz, 3H), 1.09-1.07 (m, 2H), 1.00 (s, 3H), 0.19 (s, 3H), -0.29 (s, 3H). HRMS (ESI):  $m/z$  calcd for C<sub>27</sub>H<sub>33</sub>N<sub>2</sub>O<sub>4</sub>: 449.2435 [M+H<sup>+</sup>], found: 449.2433.

The free radical-trapping adduct **44**<sup>S4</sup> of ArS<sup>•</sup> with TEMPO was purified by flash column chromatography (petroleum ether/ethyl acetate v/v =50:1) yielding a yellow oil in 75%. <sup>1</sup>H NMR (400 MHz, CDCl<sub>3</sub>)  $\delta$  7.55 (d,  $J$  = 8.2 Hz, 2H), 7.25 (d,  $J$  = 8.1 Hz, 2H), 2.39 (s, 3H), 1.66-1.49 (m, 15H), 0.92 (s, 3H). Above data are consistent with the reported literature.<sup>S3, S4</sup>

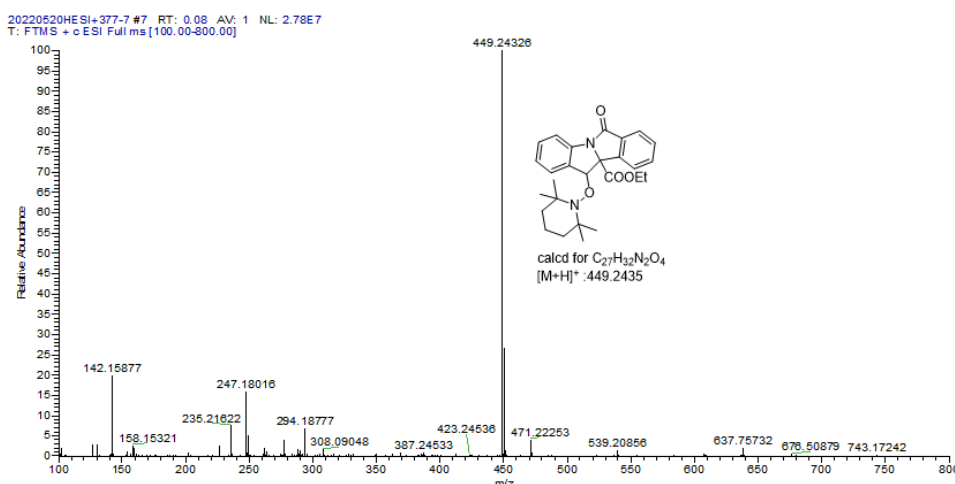

**Figure S6.** HRMS analysis of free radical-trapping adducts with TEMPO.

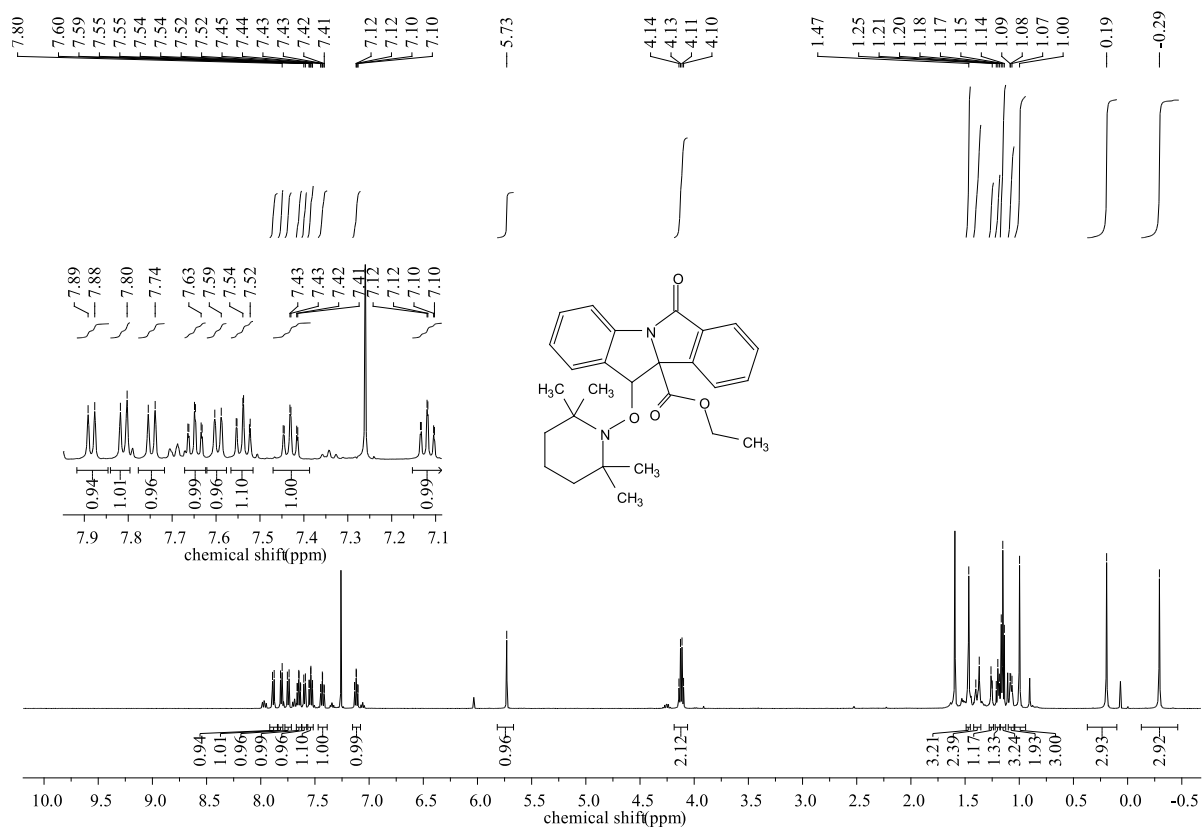

**Figure S7.** <sup>1</sup>H NMR Spectra of the free radical-trapping adduct **43** of benzyl radical intermediate with TEMPO.

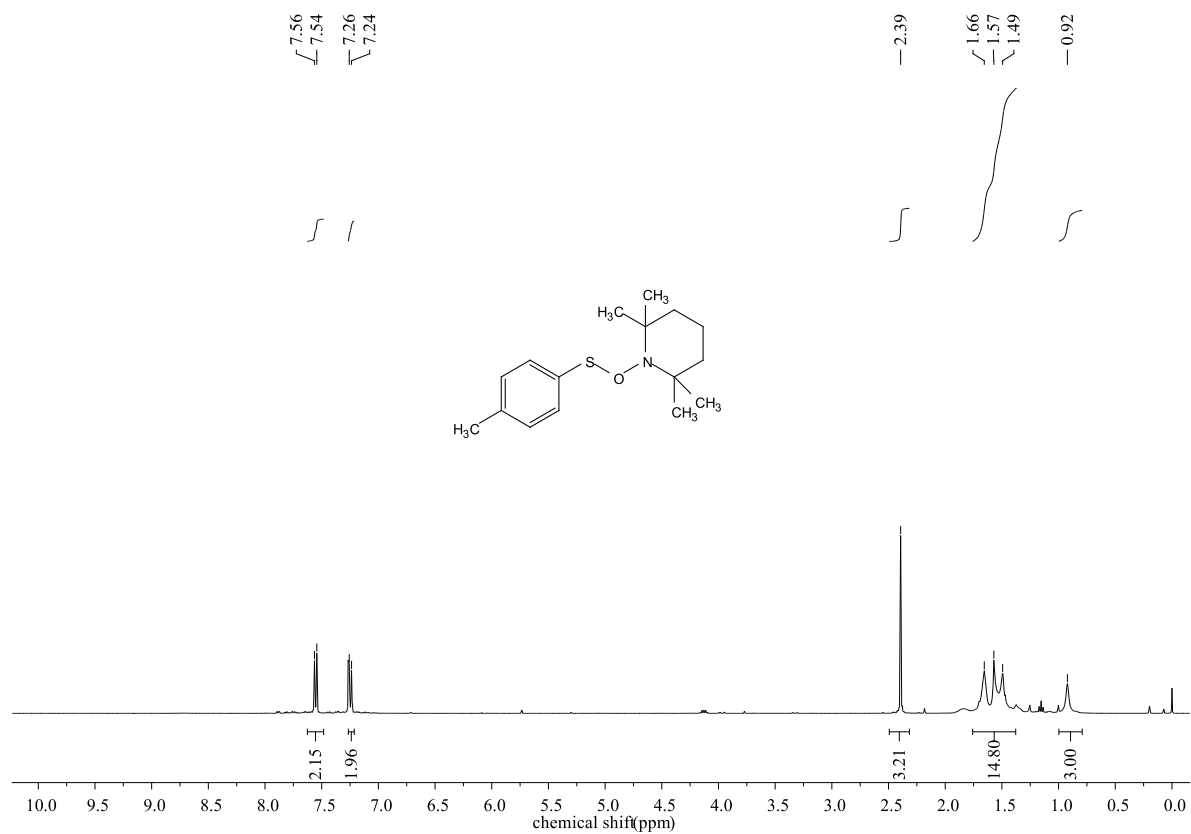

**Figure S8.** <sup>1</sup>H NMR Spectra of the free radical-trapping adduct **44** of ArS<sup>•</sup> with TEMPO.

### 3.5 Benzyl anion-trapping experiments

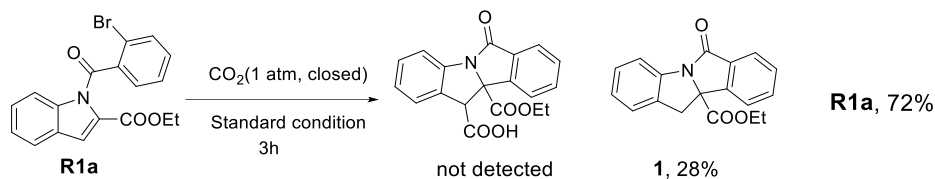

The substrate **R1a** (0.2 mmol, 1.0 eq.) was added to a 10 mL transparent Schlenk tube equipped with a stirring bar. The tube was evacuated and refilled with  $\text{CO}_2$  three times. Then DMSO (0.1 M), DIPEA (1.5 eq.) and **S1** (1.5 eq.) were added via a gastight syringe. Afterwards, the tube was sealed, and the reaction mixture was stirred under irradiation with blue LED (456 nm, distance approximately 3.0 cm from the bulb) with a fan at room temperature for 3 h. Then, the mixture was quenched with 1 mL of  $\text{H}_2\text{O}$  and 2 mL of HCl (2 N), extracted with DCM (3×10 mL) and washed with water to remove DMSO. The organic layers were combined and concentrated under vacuum, and the yields were determined by  $^1\text{H}$  NMR analysis using 1,3,5-trimethoxybenzene as internal standards.

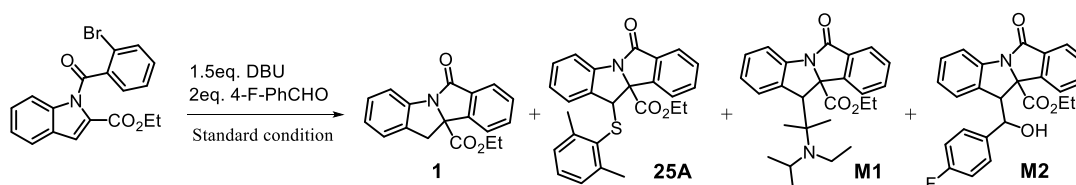

The substrate **R1a** (0.2 mmol, 1.0 eq.) was added to a 10 mL transparent Schlenk tube equipped with a stirring bar. The tube was evacuated and refilled with nitrogen ( $\text{N}_2$ ) three times. Then DMSO (0.1 M), DIPEA (1.5 equiv), **S1** (1.5 equiv), DBU (1.5 equiv) and 4-F-PhCHO (2 equiv) were added via a gastight syringe under nitrogen atmosphere. Afterwards, the tube was sealed, and the reaction mixture was stirred under irradiation with blue LED (456 nm, distance approximately 3.0 cm from the bulb) with a fan at room temperature for 10 h. The reaction mixture was analyzed by HRMS with ESI source, the  $m/z$  peaks of adduct product **M2** of the benzyl anion with the aldehyde was found at 440.1272, and the mass spectrum shown in Fig. S9. Meanwhile, the coupling products **25A** and **M1** of benzyl radical with  $\text{ArS}^\bullet$  and  $\text{DIPEA}[-\text{H}]^\bullet$  were observed at  $m/z$  452.1290 and 421.2485, respectively.

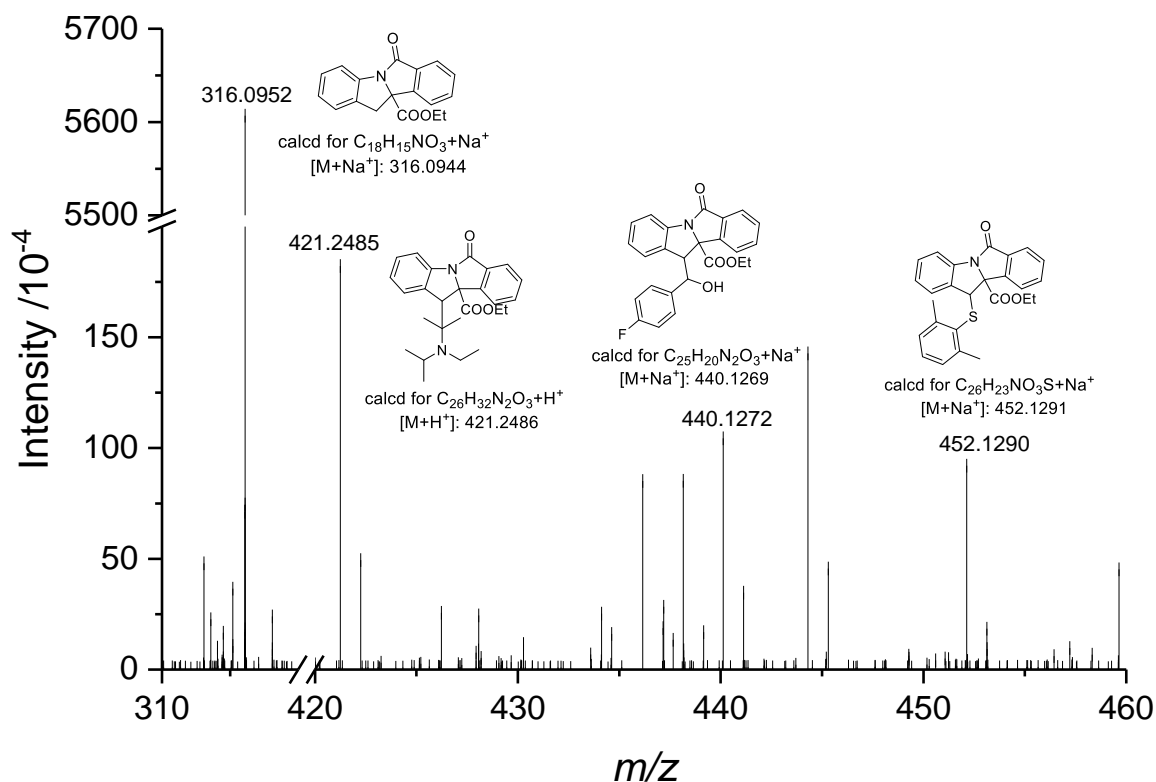

**Figure S9.** HRMS analysis of the reaction with aldehyde.

### 3.6 Deuterium labeling experiments

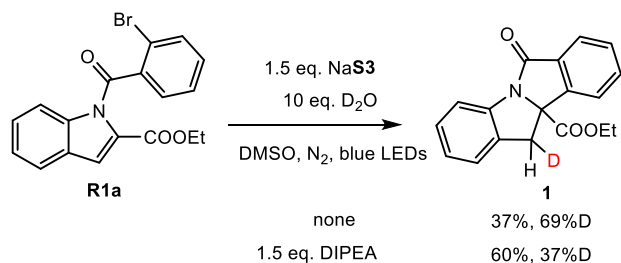

In a glovebox, to a Schlenk tube with a stirring bar was added **R1a** (0.1 mmol, 1.0 eq.), NaS3 (sodium benzenethiolate) (1.5 eq.), DMSO (1 mL), D<sub>2</sub>O (10 eq.) with or without DIPEA (1.5 eq.). Afterwards, the tube was sealed, and the reaction mixture was stirred under irradiation with blue LED (456 nm, distance approximately 3.0 cm from the bulb) with a fan at room temperature for 10 h. The reaction mixture was extracted with DCM (3×10 mL) and washed with water to remove DMSO. The yields were determined by  $^1H$  NMR analysis using 1,3,5-trimethoxybenzene as internal standards. The desired product was purified by flash column chromatography (petroleum ether/ethyl acetate v/v =10:1) to give **1**. As shown in Fig. S10, the deuterium incorporation of the isolated product was determined by integration of the peak areas of  $^1H$  NMR spectroscopy. The deuterium incorporation of the other deuterium labeling experiments were analyzed by analogy.

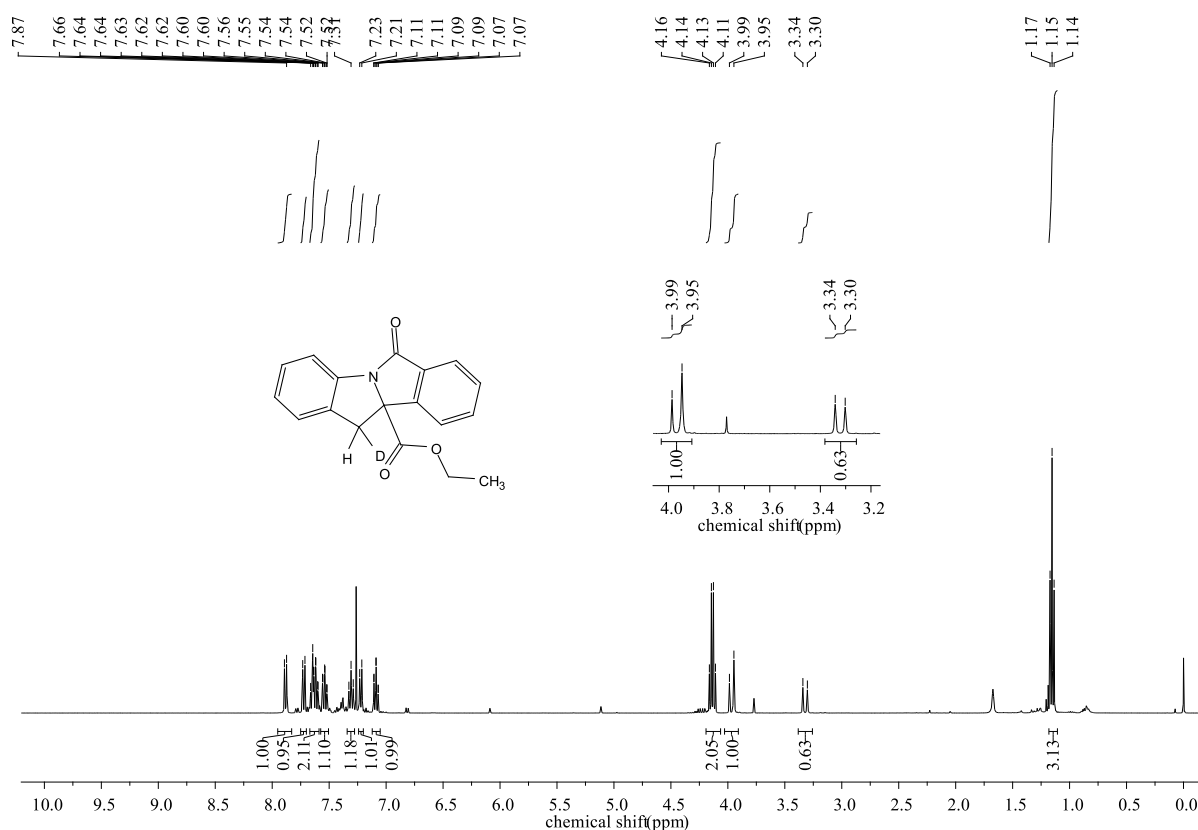

**Figure S10.**  $^1\text{H}$  NMR Spectra of compound **1** with 37% deuterium incorporation.

### Control experiments with $\text{D}_2\text{O}$

The reactant **R1a** was stirred with deuterated water under the reaction condition in dark, there were no deuterated trace in **R1a**. Therefore, we could rule out the possibility that the direct H/D exchange of **R1a** with  $\text{D}_2\text{O}$ .

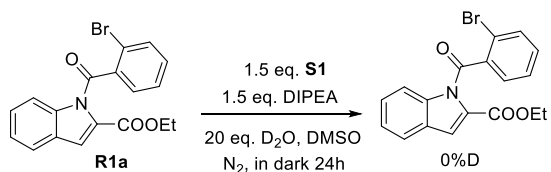

The dearomatization product **1** was stirred with deuterated water under the reaction condition in dark, there were no deuterated trace in **1**. Therefore, we could rule out the possibility that the direct H/D exchange of **1** with  $\text{D}_2\text{O}$ .

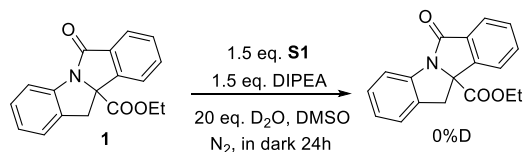

### 3.7 NOE analysis of the major isomer of **24**

The stereochemistry of the major isomer of **24** was analyzed by NOESY spectroscopy. The methyl ( $\delta=1.52$  ppm) at C2 of indole was determined to be *syn* to C3-substituent group based on a cross signal between the methyl hydrogen and methylene hydrogen of  $-\text{CH}_2\text{CO}_2\text{Me}$  at C3 of indole at 2.96 ppm, while there is no cross signal between the methyl and benzylic hydrogen at 3.73 ppm. The both evidences indicated the *syn*-relationship between the newly generated C–C bond and C–H bond. The *syn*-form stereochemistry of the other disubstituted products was surmised by analogy while **25A** could be opposite as a nucleophilic substitution product of **25**.

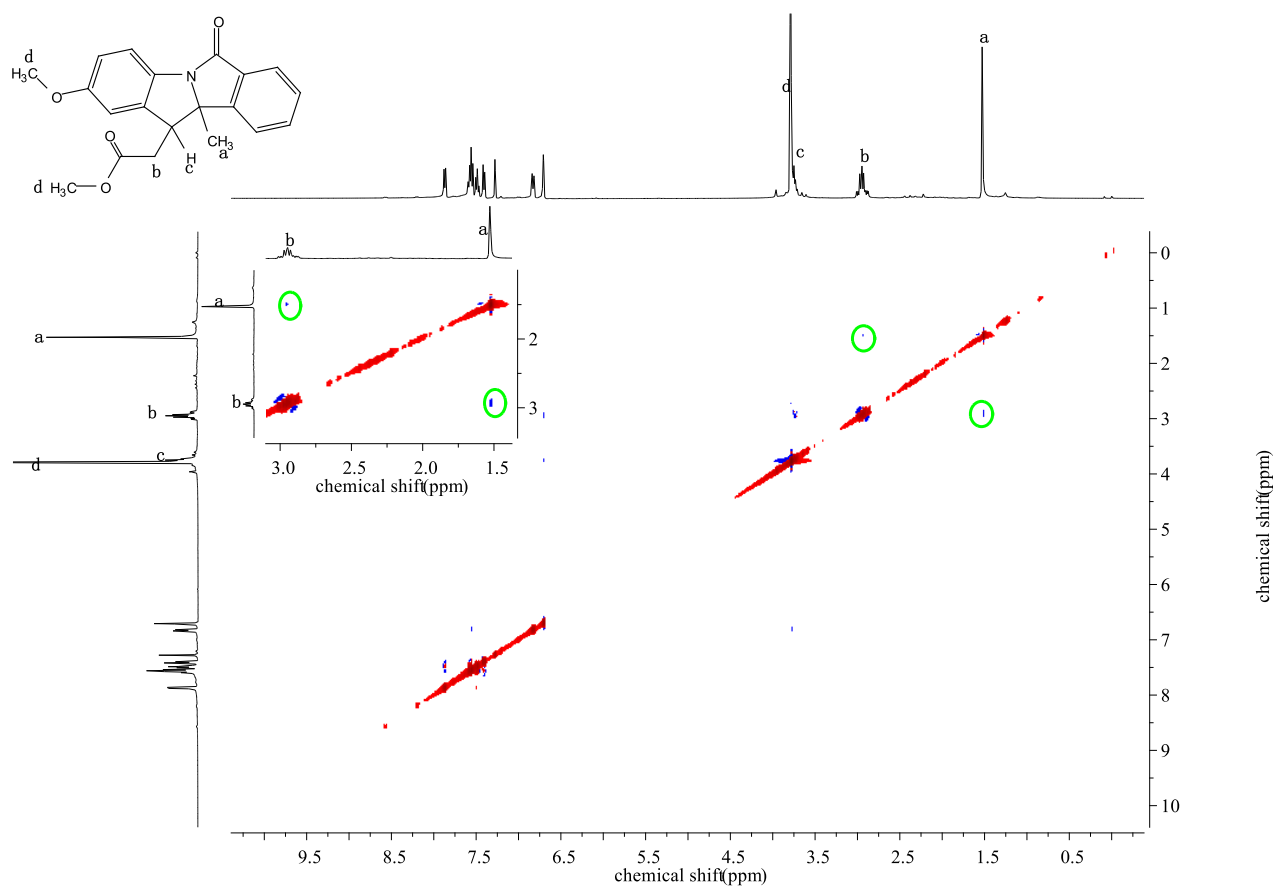

**Figure S11.** NOESY spectra of compound **24**.

## 4. Experimental procedure

### 4.1 Synthesis of substrates

#### General Procedure 1

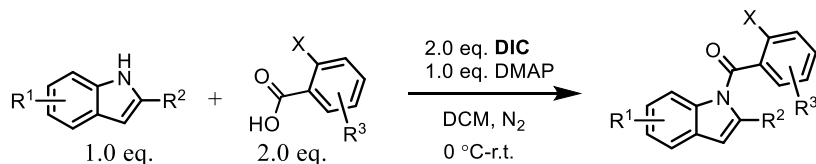

The solution of indole derivative (1.0 eq.), dimethylaminopyridine (DMAP) (1.0 eq.), carboxylic acid (2.0 eq.) and DCM (0.1 M) were stirred at 0 °C under a nitrogen atmosphere for 30 mins. After that, N,N'-diisopropylcarbodiimide (DIC) (2.0 eq.) was added dropwise via syringe and the solution was warmed to room temperature until the indole derivative was consumed (monitored by TLC). After the reaction was completed, then the precipitate was filtered off and the solution was concentrated under vacuum. Corresponding substrates were further purified by column chromatography.

#### General Procedure 2

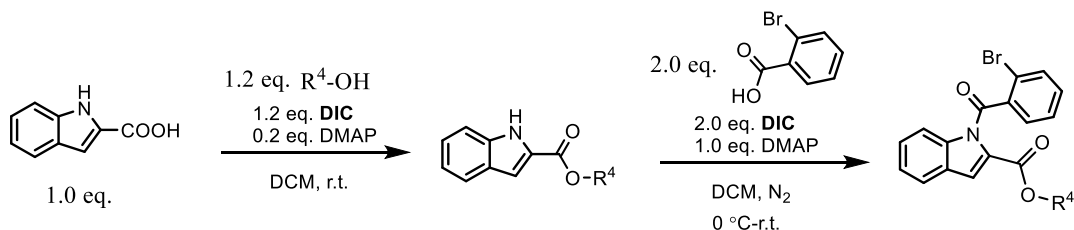

1H-indole-2-carboxylic acid (1.0 eq.), hydroxyl compound  $R^4$ -OH (1.2 eq.), DMAP (0.2 eq.) and dichloromethane (0.1 M) were placed in a 100 mL round-bottomed flask equipped with a stirring bar. After that, DIC (1.2 eq.) was added dropwise via syringe and the mixture was stirred at room temperature until the acid was consumed. After the reaction was completed, the precipitate was filtered off and the solution was concentrated under vacuum. Corresponding 2-formiate indole derivatives were purified by short column chromatography (petroleum ether/ethyl acetate v/v =5:1) and used for the following step which is the same as **General Procedure 1**.

#### Synthesis of Substrates R13 and R14

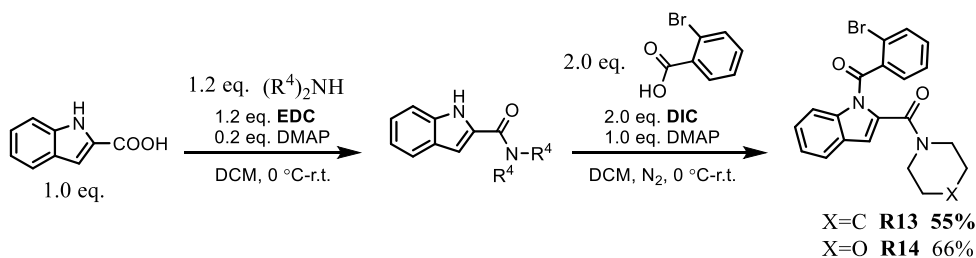

1H-indole-2-carboxylic acid (1.0 eq.), 1-(3-Dimethylaminopropyl)-3-ethylcarbodiimide hydrochloride (EDC), (1.2 eq.), DMAP (0.2 eq.) and dichloromethane 0.1 M) were stirred at 0 °C under a nitrogen atmosphere for 10 mins. After that, secondary amines (R<sup>4</sup>)<sub>2</sub>NH (1.2 eq.) was added dropwise via syringe and the mixture was stirred at room temperature overnight. Upon completion the reaction was extracted with DCM and washed with saturated NaHCO<sub>3</sub> solution. The combined organic phases was concentrated under vacuum. Corresponding 2-amide indole derivatives were further purified by short column chromatography (petroleum ether/ethyl acetate v/v =2:1) and used for the following step which is the same as **General Procedure 1**.

### Synthesis of Substrates R39

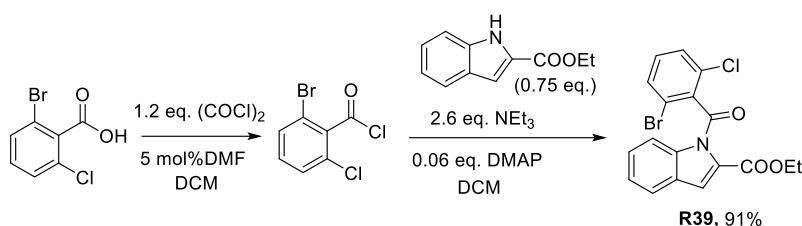

To a 100 mL oven-dried flask added 2-bromo-6-chlorobenzoic acid (1 eq.) and solvent DCM (0.5 M) with 5 mol% DMF. Then oxalyl chloride (1.2 eq.) was slowly added to the solution. After 2 h, the solvent was removed in vacuo. The obtained product 2-bromo-6-chlorobenzoyl chloride used for next step without further purification. In a separate flame dried flask, to a solution of ethyl 1H-indole-2-carboxylate and DMAP (0.06 eq.) in DCM (0.1 M) was added NEt<sub>3</sub> (2.6 eq.) at 0 °C under a nitrogen atmosphere for 30 mins. Later, the acyl chloride was diluted by DCM and added dropwise to the reaction mixture. The reaction was warmed to room temperature and stirred overnight. Upon completion the reaction was quenched with saturated NH<sub>4</sub>Cl solution and extracted with DCM. The organic layers were combined and concentrated under vacuum. The residue was purified via silica gel column chromatography (petroleum ether/ethyl acetate v/v =5:1) to give the corresponding substrates.

### Synthesis of substrates R5a and R5b

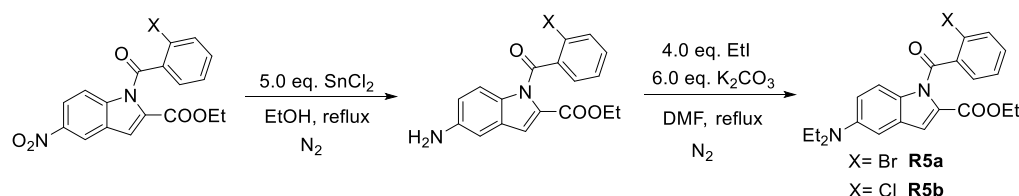

Indole derivative (1 eq.) and SnCl<sub>2</sub>·2H<sub>2</sub>O (5 eq.) were placed in a 100 mL round-bottomed flask equipped with a stirring bar under a nitrogen atmosphere. Then anhydrous ethanol (0.3 M) was added and the mixture was heated to reflux overnight. Upon completion the reaction mixture was poured into ice 2 M NaOH. Later, the mixture was extracted with DCM, washed with brine. The solvent was removed under reduced pressure and purified with flash

column chromatography (petroleum ether/ethyl acetate v/v =10:3) to obtain the reduction product.

To a mixture of the above reduction product (1 eq.) and  $K_2CO_3$  (6 eq.) in DMF (0.3 M) under a nitrogen atmosphere, iodoethane (4 eq.) was added in drop wise manner. The reaction was stirred at reflux for 16 hours. After cooling down to room temperature, the mixture was treated with water and extracted with ethyl acetate. The organic solvent was dried over anhydrous  $Na_2SO_4$ . After removal of the solvent in vacuum, the residue was purified via column chromatography (petroleum ether/ethyl acetate v/v =10:1).

## 4.2 Photomediated dearomatization reaction

### General Procedure 3

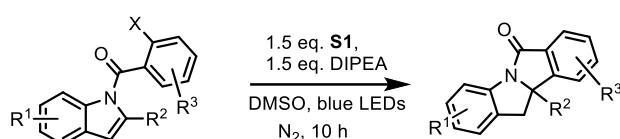

The substrate (1.0 eq.) was added to a 10 mL transparent Schlenk tube equipped with a stirring bar. The tube was evacuated and refilled with nitrogen ( $N_2$ ) three times. Then DMSO (0.1 M), DIPEA (1.5 eq.), and aryl thiol (1.5 eq.) were added via a gastight syringe under nitrogen atmosphere. Afterwards, the tube was sealed, and the reaction mixture was stirred under irradiation with blue LED (456 nm, distance approximately 3.0 cm from the bulb) with a fan at room temperature for 10 h. The reaction mixture was extracted with DCM (3×10 mL) and washed with water to remove DMSO. The organic layers were combined and concentrated under vacuum. The desired product was purified by flash column chromatography.

### General Procedure 4

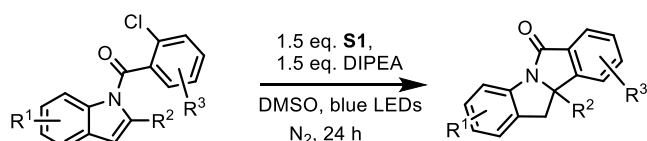

The substrate (1.0 eq.) was added to a 10 mL transparent Schlenk tube equipped with a stirring bar. The tube was evacuated and refilled with nitrogen ( $N_2$ ) three times. Then DMSO (0.033 M), DIPEA (1.5 eq.), and aryl thiol (1.5 eq.) were added via a gastight syringe under nitrogen atmosphere. Afterwards, the tube was sealed, and the reaction mixture was stirred under irradiation with blue LED (456 nm, distance approximately 3.0 cm from the bulb) with a fan at room temperature for 24 h. The reaction mixture was extracted with DCM (3×10 mL) and washed with water to remove DMSO. The organic layers were combined and concentrated under vacuum. The desired product was purified by flash column chromatography.

## Gram-scale experiment

The substrate **R1a** (1.0 g, 2.69 mmol) was added to a 100 mL transparent Schlenk tube equipped with a stirring bar. The tube was evacuated and refilled with nitrogen (N<sub>2</sub>) three times. Then DMSO (27 mL), DIPEA (4.03 mmol, 702  $\mu$ L, 1.5 eq.), and **S1** (4.03 mmol, 533  $\mu$ L, 1.5 eq.) were added via a gastight syringe under nitrogen atmosphere. Afterwards, the tube was sealed, and the reaction mixture was stirred under irradiation with blue LED (456 nm, distance approximately 3.0 cm from the bulb) with a fan at room temperature for 24 h. The reaction mixture was extracted with DCM (3 $\times$ 50 mL) and washed with water to remove DMSO. The organic layers were combined and concentrated under vacuum. The desired product was purified by flash column chromatography (petroleum ether/ethyl acetate v/v =10:1) to obtain a white solid in 81% yield (639 mg).

## 4.3 Product derivatization

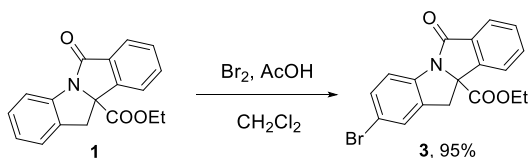

The brominated reaction was conducted according to a reported procedure.<sup>S5</sup> To a suspension of **1** (58.6 mg, 0.2 mmol) in AcOH (2 mL) was added liquid Br<sub>2</sub> (103 $\mu$ L, 2 mmol) at room temperature. The mixture was stirred for 0.5 h and then CH<sub>2</sub>Cl<sub>2</sub> (2 mL) was added to the mixture. After stirring overnight at room temperature, the reaction was quenched with saturated Na<sub>2</sub>S<sub>2</sub>O<sub>3</sub> solution and extracted with CH<sub>2</sub>Cl<sub>2</sub> (10 mL  $\times$  3). The organic layers were washed with brine and then concentrated under vacuum. The residue was purified by flash chromatography (petroleum ether/ethyl acetate v/v =10:1) to obtain **3** as a white solid in 95% yield (70.2 mg).

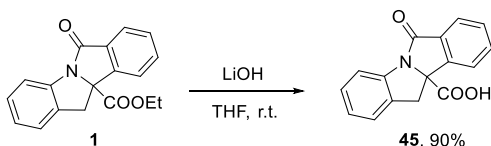

The ester hydrolysis was conducted according to a reported procedure.<sup>S5</sup> **1** (58.6 mg, 0.2 mmol) were dissolved in 2 mL of THF and 1 M LiOH (0.5 mL, 0.5 mmol) was added at room temperature. After 2 h, THF was evaporated and 2 mL of water was added to the mixture. The pH was adjusted to 3 with 1 M HCl and extracted with ethyl acetate. The organic layers were combined and evaporated under reduced pressure to obtain **45** as a white solid in 90% yield (47.7 mg). <sup>1</sup>H NMR (500 MHz, CDCl<sub>3</sub>)  $\delta$  7.86 (d,  $J$  = 7.6 Hz, 1H), 7.68 (d,  $J$  = 4.4 Hz, 1H), 7.67 (d,  $J$  = 4.2 Hz, 1H), 7.62 (t,  $J$  = 7.4 Hz, 1H), 7.53 (t,  $J$  = 7.4 Hz, 1H), 7.29 (t,  $J$  = 7.7 Hz, 1H), 7.20 (d,  $J$  = 7.5 Hz, 1H), 7.09 (t,  $J$  = 7.4 Hz, 1H), 3.94 (d,  $J$  = 15.8 Hz, 1H), 3.34 (d,  $J$  = 15.8 Hz, 1H). <sup>13</sup>C NMR (125 MHz, CDCl<sub>3</sub>)  $\delta$  175.4, 168.6, 143.8, 139.7, 133.9, 133.5, 133.0, 130.1, 128.4, 125.3, 125.2, 125.1, 123.4, 116.9, 76.5, 38.1. HRMS (ESI):  $m/z$  calcd for

$C_{16}H_{11}NO_3+H^+$  266.0812 [ $M+H^+$ ]; found: 266.0817.

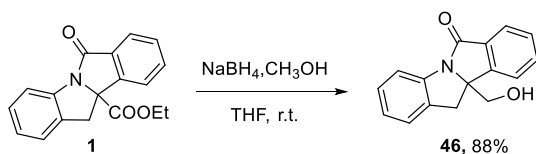

The reduction was conducted according to a reported procedure.<sup>S6</sup> A dry 50 mL round bottomed flask under nitrogen was charged with **1** (58.6 mg, 0.2 mmol), NaBH<sub>4</sub> (45.6 mg, 6.00 mmol, 1.2 equiv), methanol (2 mL) and THF (8 mL). The reaction was stirred under a nitrogen atmosphere for 12 hours after which it was quenched with NH<sub>4</sub>Cl (sat. aq.) (2 mL). The reaction was diluted with ethyl acetate and the phases were separated. The aqueous phase was extracted with ethyl acetate. The organic layers were rinsed with water and then dried over anhydrous Na<sub>2</sub>SO<sub>4</sub>. After filtration and concentration under vacuum, the residue was purified by flash chromatography (petroleum ether/ethyl acetate v/v =5:2) to obtain **46** as a white solid in 88% yield (44.1 mg). <sup>1</sup>H NMR (500 MHz, CDCl<sub>3</sub>) δ 7.86 (d, *J* = 7.6 Hz, 1H), 7.66 (d, *J* = 7.8 Hz, 1H), 7.63 (dd, *J* = 7.5 Hz, 0.8 Hz, 1H), 7.54 (d, *J* = 7.6 Hz, 1H), 7.50 (t, *J* = 7.7 Hz, 1H), 7.28 (t, *J* = 7.6 Hz, 1H), 7.22 (d, *J* = 7.4 Hz, 1H), 7.08 (t, *J* = 7.5 Hz, 1H), 3.93 (dd, *J* = 11.4 Hz, 7.5 Hz, 1H), 3.93 (dd, *J* = 11.4 Hz, 5.1 Hz, 1H), 3.27-3.20 (m, 2H), 2.08 (s, 1H). <sup>13</sup>C NMR (125 MHz, CDCl<sub>3</sub>) δ 169.6, 148.2, 140.0, 135.3, 133.6, 133.1, 129.1, 128.1, 125.6, 125.1, 124.7, 122.4, 117.0, 75.1, 67.3, 35.6. HRMS (ESI): *m/z* calcd for C<sub>16</sub>H<sub>13</sub>NO<sub>2</sub>+H<sup>+</sup> 252.1019 [ $M+H^+$ ]; found: 252.1023.

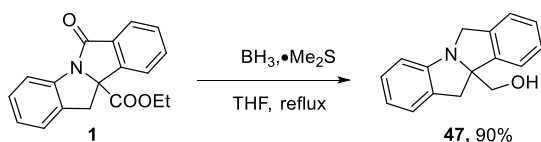

The reduction was conducted according to a reported procedure.<sup>S7</sup> BH<sub>3</sub>•Me<sub>2</sub>S (200 μL, 0.48 mol, 2.4 equiv., 2.0 M in THF) was added dropwisely to a solution of **1** (58.6 mg, 0.2 mmol) in anhydrous THF (2 mL). The solution was refluxed overnight. Then the mixture was cooled to 0 °C and MeOH (4 mL) was added. After stirred for 30 min, organic solvent were removed under vacuum, and the residue was purified by flash chromatography (petroleum ether/ethyl acetate v/v =5:1) to obtain **47** as a white solid in 90% yield (42.7 mg). <sup>1</sup>H NMR (500 MHz, CDCl<sub>3</sub>) δ 7.18-7.16 (m, 3H), 7.13-7.12 (m, 1H), 7.04 (t, *J* = 7.6 Hz, 1H), 6.99 (d, *J* = 7.5 Hz, 1H), 6.75-6.72 (m, 2H), 4.58 (d, *J* = 15.0 Hz, 1H), 4.37 (d, *J* = 15.0 Hz, 1H), 3.58 (d, *J* = 11.2 Hz, 1H), 3.52 (d, *J* = 11.2 Hz, 1H), 3.47 (d, *J* = 15.9 Hz, 1H), 3.29 (d, *J* = 15.9 Hz, 1H). <sup>13</sup>C NMR (125 MHz, CDCl<sub>3</sub>) δ 154.3, 143.7, 139.8, 130.1, 128.2, 127.7, 127.6, 124.8, 122.9, 122.2, 121.1, 112.5, 81.6, 67.5, 58.5, 37.3. HRMS (ESI): *m/z* calcd for C<sub>16</sub>H<sub>15</sub>NO+H<sup>+</sup> 238.1226 [ $M+H^+$ ]; found: 238.1222.

## 5. Synthesis and characterization of starting materials

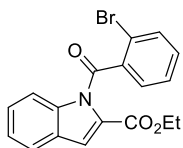

Ethyl 1-(2-bromobenzoyl)-1H-indole-2-carboxylate (**R1a**)

**R1a** was synthesized by **General Procedure 1** on a 10 mmol scale and isolated by flash chromatography (petroleum ether/ethyl acetate v/v =5:1) yielding a white solid (3350.0 mg, 90% yield).  $^1\text{H}$  NMR (500 MHz,  $\text{CDCl}_3$ )  $\delta$  8.00-7.98 (dd,  $J$  = 8.4 Hz, 0.7 Hz, 1H), 7.68-7.66 (m, 2H), 7.46-7.43 (m, 1H), 7.35-7.34 (m, 4H), 7.31 (s, 1H), 4.00 (q,  $J$  = 7.1 Hz, 2H), 1.15 (t,  $J$  = 7.1 Hz, 3H).  $^{13}\text{C}$  NMR (125 MHz,  $\text{CDCl}_3$ )  $\delta$  167.2, 160.9, 138.8, 137.1, 134.0, 132.4, 130.9, 130.6, 127.8, 127.6, 127.1, 124.2, 122.5, 121.7, 117.4, 115.0, 61.5, 14.1. HRMS (ESI):  $m/z$  calcd for  $\text{C}_{18}\text{H}_{14}\text{BrNO}_3 + \text{Na}^+$ : 394.0049 [ $M + \text{Na}^+$ ]; found: 394.0036.

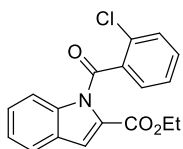

Ethyl 1-(2-chlorobenzoyl)-1H-indole-2-carboxylate (**R1b**)

**R1b** was synthesized by **General Procedure 1** on a 1 mmol scale and isolated by flash chromatography (petroleum ether/ethyl acetate v/v =1:1) yielding a white solid (297.6 mg, 91% yield).  $^1\text{H}$  NMR (500 MHz,  $\text{CDCl}_3$ )  $\delta$  8.01 (dd,  $J$  = 8.5 Hz, 0.5 Hz, 1H), 7.68 (d,  $J$  = 7.8 Hz, 1H), 7.49-7.42 (m, 3H), 7.35-7.28 (m, 4H), 7.23 (s, 1H), 3.98 (q,  $J$  = 7.1 Hz, 2H), 1.14 (t,  $J$  = 7.1 Hz, 3H).  $^{13}\text{C}$  NMR (125 MHz,  $\text{CDCl}_3$ )  $\delta$  166.5, 160.9, 138.8, 135.3, 133.3, 132.4, 130.9, 130.7, 130.3, 127.8, 127.5, 126.6, 124.2, 122.5, 117.3, 115.0, 61.5, 14.0. HRMS (ESI):  $m/z$  calcd for  $\text{C}_{18}\text{H}_{14}\text{ClNO}_3 + \text{H}^+$ : 328.0735 [ $M + \text{H}^+$ ]; found: 328.0743.

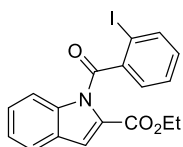

Ethyl 1-(2-iodobenzoyl)-1H-indole-2-carboxylate (**R1c**)<sup>S8</sup>

**R1c** was synthesized by **General Procedure 1** on a 1 mmol scale and isolated by flash chromatography (petroleum ether/ethyl acetate v/v =5:1) yielding a white solid (406.6 mg, 97% yield).  $^1\text{H}$  NMR (400 MHz,  $\text{CDCl}_3$ )  $\delta$  7.96 (t,  $J$  = 8.0 Hz, 1H), 7.66 (d,  $J$  = 7.8 Hz, 2H), 7.45-7.41 ((td,  $J$  = 8.2 Hz, 1.2 Hz, 1H), 7.38-7.28 (m, 4H), 7.16 (td,  $J$  = 7.7 Hz, 1.4 Hz, 1H), 4.00 (q,  $J$  = 7.1 Hz, 2H), 1.14 (t,  $J$  = 7.1 Hz, 3H).

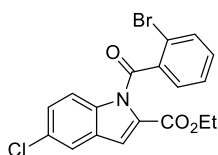

Ethyl 1-(2-bromobenzoyl)-5-chloro-1H-indole-2-carboxylate (**R2a**)

**R2a** was synthesized by **General Procedure 1** on a 1 mmol scale and isolated by flash chromatography (petroleum ether/ethyl acetate v/v =1:1) yielding a white solid (366.0 mg, 90% yield).  $^1\text{H}$  NMR (500 MHz,  $\text{CDCl}_3$ )  $\delta$  7.95 (d,  $J$

= 8.9 Hz, 1H), 7.68-7.66 (m, 1H), 7.65 (d,  $J = 2.0$  Hz, 1H), 7.40 (dd,  $J = 8.9$  Hz, 2.1 Hz, 1H), 7.38-7.35 (m, 3H), 7.23 (s, 1H), 3.98 (q,  $J = 7.1$  Hz, 2H), 1.14 (t,  $J = 7.1$  Hz, 3H).  $^{13}\text{C}$  NMR (125 MHz,  $\text{CDCl}_3$ )  $\delta$  167.1, 160.6, 137.0, 136.8, 134.0, 132.6, 132.1, 130.7, 129.8, 128.6, 128.0, 127.2, 121.8, 121.6, 116.2, 116.1, 61.7, 14.0. HRMS (ESI):  $m/z$  calcd for  $\text{C}_{18}\text{H}_{14}\text{ClBrNO}_3$ : 405.9840 [ $M+\text{H}^+$ ]; found: 405.9845.

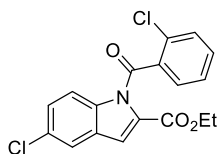

Ethyl 5-chloro-1-(2-chlorobenzoyl)-1H-indole-2-carboxylate (**R2b**)

**R2b** was synthesized by **General Procedure 1** on a 1 mmol scale and isolated by flash chromatography (petroleum ether/ethyl acetate v/v=1:1) yielding a white solid (279.9 mg, 77% yield).  $^1\text{H}$  NMR (400 MHz,  $\text{CDCl}_3$ )  $\delta$  7.98 (d,  $J = 9.0$  Hz, 1H), 7.65 (d,  $J = 1.8$  Hz, 1H), 7.49-7.44 (m, 2H), 7.98 (dd,  $J = 9.0$  Hz, 2.2 Hz, 1H), 7.36-7.29 (m, 2H), 7.23 (d,  $J = 0.6$  Hz, 1H), 3.97 (q,  $J = 7.1$  Hz, 2H), 1.14 (t,  $J = 7.1$  Hz, 3H).  $^{13}\text{C}$  NMR (100 MHz,  $\text{CDCl}_3$ )  $\delta$  166.4, 160.6, 137.0, 134.9, 133.3, 132.6, 132.0, 130.7, 130.4, 129.8, 128.6, 128.0, 126.6, 121.8, 116.1, 116.0, 61.7, 14.0. HRMS (ESI):  $m/z$  calcd for  $\text{C}_{18}\text{H}_{14}\text{Cl}_2\text{NO}_3$ : 362.0345 [ $M+\text{H}^+$ ]; found: 362.0375.

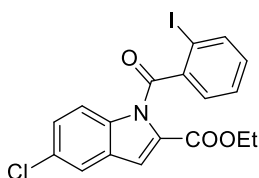

Ethyl 5-chloro-1-(2-iodobenzoyl)-1H-indole-2-carboxylate (**R2c**)

**R2c** was synthesized by **General Procedure 1** on a 1 mmol scale and isolated by flash chromatography (petroleum ether/ethyl acetate v/v=5:1) yielding a white solid (340.2 mg, 75% yield).  $^1\text{H}$  NMR (500 MHz,  $\text{CDCl}_3$ )  $\delta$  7.97 (d,  $J = 7.9$  Hz, 1H), 7.85 (d,  $J = 8.9$  Hz, 1H), 7.81 (d,  $J = 1.6$  Hz, 1H), 7.53 (dd,  $J = 8.9$  Hz, 1.8 Hz, 1H), 7.39 (t,  $J = 7.5$  Hz, 1H), 7.28 (dd,  $J = 7.8$  Hz, 1.3 Hz, 1H), 7.22 (s, 1H), 7.18 (td,  $J = 7.8$  Hz, 1.5 Hz, 1H), 3.99 (q,  $J = 7.1$  Hz, 2H), 1.15 (t,  $J = 7.1$  Hz, 3H).  $^{13}\text{C}$  NMR (125 MHz,  $\text{CDCl}_3$ )  $\delta$  168.2, 160.5, 140.8, 140.1, 137.5, 132.6, 132.0, 130.6, 130.4, 129.2, 127.8, 125.0, 117.4, 116.6, 116.0, 94.3, 61.7, 14.1. HRMS (ESI):  $m/z$  calcd for  $\text{C}_{18}\text{H}_{14}\text{ClINO}_3$ : 453.9701 [ $M+\text{H}^+$ ]; found: 453.9708.

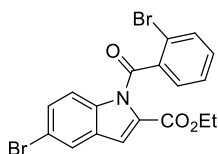

Ethyl 5-bromo-1-(2-bromobenzoyl)-1H-indole-2-carboxylate (**R3a**)

**R3a** was synthesized by **General Procedure 1** on a 1 mmol scale and isolated by flash chromatography (petroleum ether/ethyl acetate v/v=15:1) yielding a white solid (297.7 mg, 66% yield).  $^1\text{H}$  NMR (400 MHz,  $\text{CDCl}_3$ )  $\delta$  7.90 (d,  $J = 8.9$  Hz, 1H), 7.80 (m, 1H), 7.67-7.65 (m, 1H), 7.55-7.52 (m, 1H), 7.37-7.35 (m, 3H), 7.22 (s, 1H), 3.98 (q,  $J = 7.1$  Hz, 2H), 1.14 (t,  $J = 7.1$  Hz, 3H).  $^{13}\text{C}$  NMR (125 MHz,  $\text{CDCl}_3$ )  $\delta$  166.0, 159.4, 136.3, 135.7, 132.9, 131.6, 130.8, 129.6, 129.5, 128.1, 126.1, 123.9, 120.5, 116.3, 115.3, 114.9, 60.6, 13.0. HRMS (ESI):  $m/z$  calcd for  $\text{C}_{18}\text{H}_{14}\text{Br}_2\text{NO}_3$ : 449.9335 [ $M+\text{H}^+$ ]; found: 449.9336.

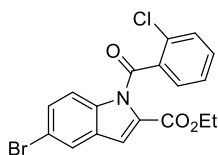

Ethyl 5-bromo-1-(2-chlorobenzoyl)-1H-indole-2-carboxylate (**R3b**)

**R3b** was synthesized by **General Procedure 1** on a 1 mmol scale and isolated by flash chromatography (petroleum ether/ethyl acetate v/v =4:1) yielding a white solid (300.9 mg, 74% yield).  $^1\text{H}$  NMR (500 MHz,  $\text{CDCl}_3$ )  $\delta$  7.90 (d,  $J$  = 9.0 Hz, 1H), 7.79 (d,  $J$  = 1.9 Hz, 1H), 7.53 (dd,  $J$  = 8.9 Hz, 2.0 Hz, 1H), 7.47-7.42 (m, 2H), 7.35-7.28 (m, 2H), 7.23 (d,  $J$  = 0.6 Hz, 1H), 7.22 (s, 1H), 3.97 (q,  $J$  = 7.2 Hz, 2H), 1.13 (t,  $J$  = 7.2 Hz, 3H).  $^{13}\text{C}$  NMR (100 MHz,  $\text{CDCl}_3$ )  $\delta$  166.3, 160.5, 137.3, 134.9, 133.2, 132.7, 131.8, 130.7, 130.6, 130.4, 129.1, 126.7, 125.0, 117.4, 116.4, 115.8, 61.7, 14.0. HRMS (ESI):  $m/z$  calcd for  $\text{C}_{18}\text{H}_{14}\text{ClBrNO}_3$ : 405.9840 [ $M+\text{H}^+$ ]; found: 405.9839.

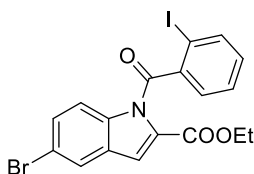

Ethyl 5-bromo-1-(2-iodobenzoyl)-1H-indole-2-carboxylate (**R3c**)

**R3c** was synthesized by **General Procedure 1** on a 1 mmol scale and isolated by flash chromatography (petroleum ether/ethyl acetate v/v =5:1) yielding a white solid (448.3 mg, 90% yield).  $^1\text{H}$  NMR (500 MHz,  $\text{CDCl}_3$ )  $\delta$  7.90 (d,  $J$  = 7.9 Hz, 1H), 7.85 (d,  $J$  = 8.9 Hz, 1H), 7.57 (d,  $J$  = 1.9 Hz, 1H), 7.34-7.30 (m, 2H), 7.21 (dd,  $J$  = 7.6 Hz, 1.4 Hz, 1H), 7.16 (s, 1H), 7.11 (td,  $J$  = 7.8 Hz, 1.5 Hz, 1H), 3.92 (q,  $J$  = 7.1 Hz, 2H), 1.07 (t,  $J$  = 7.1 Hz, 3H).  $^{13}\text{C}$  NMR (125 MHz,  $\text{CDCl}_3$ )  $\delta$  168.2, 160.5, 140.8, 140.1, 137.2, 132.6, 132.1, 130.4, 129.8, 128.7, 128.0, 127.8, 121.8, 116.2, 116.1, 94.3, 61.7, 14.1. HRMS (ESI):  $m/z$  calcd for  $\text{C}_{18}\text{H}_{13}\text{BrINO}_3+\text{Na}^+$ : 519.9016 [ $M+\text{Na}^+$ ]; found: 519.9010.

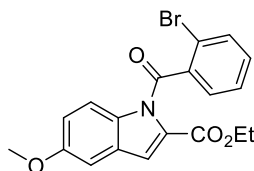

Ethyl 1-(2-bromobenzoyl)-5-methoxy-1H-indole-2-carboxylate (**R4a**)

**R4a** was synthesized by **General Procedure 1** on a 1 mmol scale and isolated by flash chromatography (petroleum ether/ethyl acetate v/v =5:1) yielding a white solid (341.9 mg, 85% yield).  $^1\text{H}$  NMR (400 MHz,  $\text{CDCl}_3$ )  $\delta$  8.00 (d,  $J$  = 8.8 Hz, 1H), 7.67-7.65 (m, 1H), 7.35-7.34 (m, 3H), 7.23 (s, 1H), 7.08-7.05 (m, 2H), 3.96 (q,  $J$  = 7.1 Hz, 2H), 3.87 (s, 3H), 1.14 (t,  $J$  = 7.1 Hz, 3H).  $^{13}\text{C}$  NMR (100 MHz,  $\text{CDCl}_3$ )  $\delta$  167.0, 160.9, 156.8, 137.2, 133.9, 133.7, 132.3, 131.4, 130.5, 128.4, 127.1, 121.6, 117.3, 117.2, 116.1, 104.0, 61.4, 55.7, 14.0. HRMS (ESI):  $m/z$  calcd for  $\text{C}_{19}\text{H}_{16}\text{BrNO}_4+\text{H}^+$ : 402.0335 [ $M+\text{H}^+$ ]; found: 402.0340.

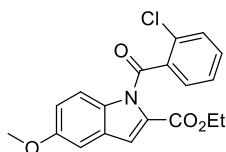

Ethyl 1-(2-chlorobenzoyl)-5-methoxy-1H-indole-2-carboxylate (**R4b**)

**R4b** was synthesized by **General Procedure 1** on a 1 mmol scale and isolated by flash chromatography (petroleum

ether/ethyl acetate v/v =5:1) yielding a white solid (196.8 mg, 55% yield).  $^1\text{H}$  NMR (400 MHz,  $\text{CDCl}_3$ )  $\delta$  7.94 (d,  $J$  = 9.8 Hz, 1H), 7.48-7.40 (m, 2H), 7.36-7.27 (m, 2H), 7.23 (s, 1H), 7.08-7.06 (m, 2H), 3.96 (q,  $J$  = 7.1 Hz, 2H), 3.87 (s, 3H), 1.13 (t,  $J$  = 7.1 Hz, 3H).  $^{13}\text{C}$  NMR (100 MHz,  $\text{CDCl}_3$ )  $\delta$  166.3, 160.9, 156.9, 135.4, 133.6, 133.2, 132.3, 131.3, 130.6, 130.3, 128.3, 126.5, 117.2, 117.1, 116.0, 104.0, 61.4, 55.7, 14.0. HRMS (ESI):  $m/z$  calcd for  $\text{C}_{19}\text{H}_{16}\text{ClNO}_4+\text{H}^+$ : 358.0841 [ $M+\text{H}^+$ ]; found: 358.0838.

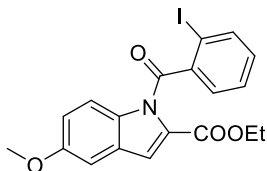

Ethyl 1-(2-iodobenzoyl)-5-methoxy-1H-indole-2-carboxylate (**R4c**)

**R4c** was synthesized by **General Procedure 1** on a 1 mmol scale and isolated by flash chromatography (petroleum ether/ethyl acetate v/v =5:1) yielding a white solid (377.4 mg, 84% yield).  $^1\text{H}$  NMR (500 MHz,  $\text{CDCl}_3$ )  $\delta$  7.96 (dd,  $J$  = 8.0 Hz, 0.8 Hz, 1H), 7.88 (d,  $J$  = 9.0 Hz, 1H), 7.37 (td,  $J$  = 7.0 Hz, 1.0 Hz, 1H), 7.28 (dd,  $J$  = 7.6 Hz, 1.6 Hz, 1H), 7.23 (s, 1H), 7.16 (td,  $J$  = 7.6 Hz, 1.6 Hz, 1H), 7.08 (d,  $J$  = 2.2 Hz, 1H), 7.06 (dd,  $J$  = 9.0 Hz, 2.6 Hz, 1H), 3.98 (q,  $J$  = 7.1 Hz, 2H), 3.87 (s, 3H), 1.14 (t,  $J$  = 7.1 Hz, 3H).  $^{13}\text{C}$  NMR (125 MHz,  $\text{CDCl}_3$ )  $\delta$  168.2, 160.9, 156.8, 140.6, 140.5, 133.8, 132.3, 131.4, 130.2, 128.4, 127.7, 117.3, 117.3, 117.2, 116.2, 104.0, 94.4, 61.5, 55.7, 14.1. HRMS (ESI):  $m/z$  calcd for  $\text{C}_{19}\text{H}_{16}\text{INO}_4+\text{H}^+$ : 450.0197 [ $M+\text{H}^+$ ]; found: 450.0195.

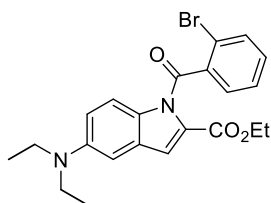

Ethyl 1-(2-bromobenzoyl)-5-(diethylamino)-1H-indole-2-carboxylate (**R5a**)

**R5a** was isolated by flash chromatography (petroleum ether/ethyl acetate v/v =10:1) yielding bright yellow oil (226.1 mg, 51 % yield).  $^1\text{H}$  NMR (500 MHz,  $\text{CDCl}_3$ )  $\delta$  7.84 (d,  $J$  = 9.2 Hz, 1H), 7.66-7.65 (m, 1H), 7.34-7.32 (m, 3H), 7.17 (s, 1H), 6.91 (dd,  $J$  = 9.2 Hz, 2.4 Hz, 1H), 6.82 (d,  $J$  = 2.3 Hz, 1H), 3.94 (q,  $J$  = 7.2 Hz, 4H), 3.38 (q,  $J$  = 7.1 Hz, 4H), 1.18 (t,  $J$  = 7.1 Hz, 6H), 1.13 (t,  $J$  = 7.2 Hz, 3H).  $^{13}\text{C}$  NMR (125 MHz,  $\text{CDCl}_3$ )  $\delta$  165.7, 160.1, 144.6, 136.5, 132.7, 131.0, 130.3, 129.9, 129.3, 128.0, 126.0, 120.6, 116.9, 114.9, 114.2, 102.5, 60.2, 43.9, 13.0, 11.5. HRMS (ESI):  $m/z$  calcd for  $\text{C}_{22}\text{H}_{23}\text{BrN}_2\text{O}_3+\text{H}^+$ : 443.0965 [ $M+\text{H}^+$ ]; found: 443.0969.

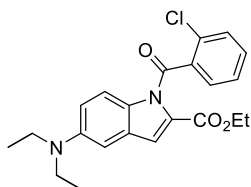

Ethyl 1-(2-chlorobenzoyl)-5-(diethylamino)-1H-indole-2-carboxylate (**R5b**)

**R5b** was isolated by flash chromatography (petroleum ether/ethyl acetate v/v =10:1) yielding bright yellow oil (172.9 mg, 43 % yield).  $^1\text{H}$  NMR (500 MHz,  $\text{CDCl}_3$ )  $\delta$  7.81 (d,  $J$  = 9.2 Hz, 1H), 7.39 (dd,  $J$  = 8.1 Hz, 0.7 Hz, 1H), 7.33 (td,  $J$  = 7.4 Hz, 1.8 Hz, 1H), 7.26 (dd,  $J$  = 7.7 Hz, 1.7 Hz, 1H), 7.21 (dd,  $J$  = 8.1 Hz, 0.9 Hz, 1H), 7.10 (s, 1H), 6.85 (dd,  $J$  = 9.2 Hz, 2.1 Hz, 1H), 6.76 (d,  $J$  = 1.8 Hz, 1H), 3.86 (q,  $J$  = 7.2 Hz, 4H), 3.32 (q,  $J$  = 7.1 Hz, 4H), 1.11 (t,  $J$  = 7.1 Hz, 6H), 1.06 (t,  $J$  = 7.2 Hz, 3H).  $^{13}\text{C}$  NMR (125 MHz,  $\text{CDCl}_3$ )  $\delta$  166.1, 161.1, 145.6, 135.7, 133.2, 132.0,

131.3, 130.8, 130.5, 130.1, 129.0, 126.5, 117.8, 115.9, 115.3, 103.5, 61.3, 45.0, 14.0, 12.5. HRMS (ESI):  $m/z$  calcd for  $C_{22}H_{23}ClN_2O_3+H^+$ : 399.1470 [ $M+H^+$ ]; found: 399.1471.

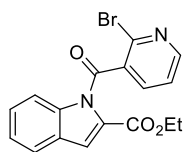

Ethyl 1-(2-bromonicotinoyl)-1H-indole-2-carboxylate (**R6a**)

**R6a** was synthesized by **General Procedure 1** on a 1 mmol scale and isolated by flash chromatography (petroleum ether/ethyl acetate v/v =5:1) yielding a white solid (369.5 mg, 99% yield).  $^1H$  NMR (500 MHz,  $CDCl_3$ )  $\delta$  8.48 (dd,  $J$  = 4.7 Hz, 1.8 Hz, 1H), 8.15 (d,  $J$  = 8.4 Hz, 1H), 7.75 (dd,  $J$  = 7.6 Hz, 2.0 Hz, 1H), 7.70 (d,  $J$  = 7.8 Hz, 1H), 7.52 (dd,  $J$  = 7.3 Hz, 1.1 Hz, 1H), 7.40-7.36 (m, 3H), 4.03 (q,  $J$  = 7.1 Hz, 2H), 1.17 (t,  $J$  = 7.1 Hz, 3H).  $^{13}C$  NMR (125 MHz,  $CDCl_3$ )  $\delta$  166.3, 160.7, 151.6, 139.6, 139.1, 134.9, 130.3, 128.3, 128.3, 127.5, 124.7, 122.7, 122.1, 118.7, 115.2, 61.6, 14.1. HRMS (ESI):  $m/z$  calcd for  $C_{17}H_{13}BrN_2O_3+H^+$ : 373.0182 [ $M+H^+$ ]; found: 373.0189.

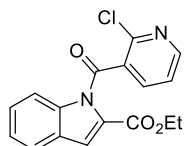

Ethyl 1-(2-chloronicotinoyl)-1H-indole-2-carboxylate (**R6b**)

**R6b** was synthesized by **General Procedure 1** on a 1 mmol scale and isolated by flash chromatography (petroleum ether/ethyl acetate v/v =10:1) yielding a white solid (263.0 mg, 80% yield).  $^1H$  NMR (400 MHz,  $CDCl_3$ )  $\delta$  8.51 (dd,  $J$  = 4.8 Hz, 1.8 Hz, 1H), 8.13 (d,  $J$  = 8.4 Hz, 1H), 7.78 (dd,  $J$  = 7.6 Hz, 1.8 Hz, 1H), 7.69 (d,  $J$  = 7.8 Hz, 1H), 7.50 (td,  $J$  = 7.8 Hz, 0.9 Hz, 1H), 7.38-7.31 (m, 3H), 4.01 (q,  $J$  = 7.1 Hz, 2H), 1.15 (t,  $J$  = 7.1 Hz, 3H).  $^{13}C$  NMR (100 MHz,  $CDCl_3$ )  $\delta$  165.7, 160.7, 151.5, 148.8, 139.2, 138.9, 132.3, 130.2, 128.3, 127.5, 124.6, 122.7, 122.0, 118.5, 115.1. HRMS (ESI):  $m/z$  calcd for  $C_{17}H_{13}ClN_2O_3+Na^+$ : 351.0507 [ $M+Na^+$ ]; found: 351.0494.

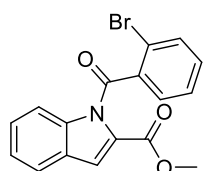

Methyl 1-(2-bromobenzoyl)-1H-indole-2-carboxylate (**R7**)<sup>S9</sup>

**R7** was synthesized by **General Procedure 1** on a 1 mmol scale and isolated by flash chromatography (petroleum ether/ethyl acetate v/v =5:1) yielding a white solid (293.7 mg, 82% yield).  $^1H$  NMR (400 MHz,  $CDCl_3$ )  $\delta$  8.00 (d,  $J$  = 8.4 Hz, 1H), 7.68-7.66 (m, 2H), 7.45 (ddd,  $J$  = 8.4 Hz, 7.2 Hz, 1.1 Hz, 1H), 7.35-7.28 (m, 5H), 3.52 (s, 3H).

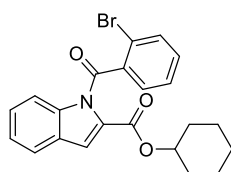

Cyclohexyl 1-(2-bromobenzoyl)-1H-indole-2-carboxylate (**R8**)

**R8** was synthesized by **General Procedure 2** on a 1 mmol scale and isolated by flash chromatography (petroleum

ether/ethyl acetate v/v =5:1) yielding a white solid (359.5 mg, 84% yield).  $^1\text{H}$  NMR (400 MHz,  $\text{CDCl}_3$ )  $\delta$  7.95 (dd,  $J$  = 8.4 Hz, 0.5 Hz, 1H), 7.67-7.65 (m, 2H), 7.43 (ddd,  $J$  = 8.4 Hz, 7.2 Hz, 1.2 Hz, 1H), 7.37-7.31 (m, 4H), 7.28 (d,  $J$  = 0.3 Hz, 1H), 4.66-4.61 (m, 1H), 1.68-1.61 (m, 4H), 1.51-1.48 (m, 1H), 1.34-1.23 (m, 5H).  $^{13}\text{C}$  NMR (125 MHz,  $\text{CDCl}_3$ )  $\delta$  167.3, 160.3, 138.8, 137.3, 133.9, 133.0, 132.3, 131.4, 130.7, 127.6, 127.1, 124.2, 122.4, 121.7, 73.9, 31.2, 25.3, 23.5. HRMS (ESI):  $m/z$  calcd for  $\text{C}_{22}\text{H}_{20}\text{BrNO}_3 + \text{H}^+$ : 426.0699 [ $M + \text{H}^+$ ]; found: 426.0709.

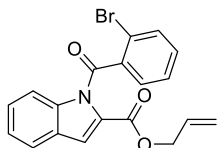

#### Allyl 1-(2-bromobenzoyl)-1H-indole-2-carboxylate (**R9**)

**R9** was synthesized by **General Procedure 2** on a 1 mmol scale and isolated by flash chromatography (petroleum ether/ethyl acetate v/v =5:1) yielding a white solid (315.1 mg, 82% yield).  $^1\text{H}$  NMR (400 MHz,  $\text{CDCl}_3$ )  $\delta$  7.97 (d,  $J$  = 8.4 Hz, 1H), 7.69-7.65 (m, 2H), 7.45 (td,  $J$  = 7.8 Hz, 1.0 Hz, 1H), 7.35-7.32 (m, 5H), 5.80-5.72 (m, 1H), 5.27-5.17 (m, 2H), 4.43 (d,  $J$  = 5.8 Hz, 1H).  $^{13}\text{C}$  NMR (125 MHz,  $\text{CDCl}_3$ )  $\delta$  160.5, 138.9, 137.1, 134.0, 132.4, 131.4, 130.6, 130.5, 127.9, 127.5, 127.1, 124.2, 122.5, 121.6, 118.9, 117.8, 115.0, 65.9. HRMS (ESI):  $m/z$  calcd for  $\text{C}_{19}\text{H}_{14}\text{BrNO}_3 + \text{H}^+$ : 384.0230 [ $M + \text{H}^+$ ]; found: 384.0226.

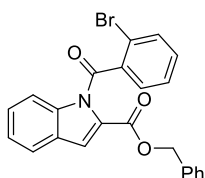

#### Benzyl 1-(2-bromobenzoyl)-1H-indole-2-carboxylate (**R10**)

**R10** was synthesized by **General Procedure 2** on a 1 mmol scale and isolated by flash chromatography (petroleum ether/ethyl acetate v/v =5:1) yielding a white solid (373.5 mg, 86% yield).  $^1\text{H}$  NMR (400 MHz,  $\text{CDCl}_3$ )  $\delta$  7.97 (d,  $J$  = 8.4 Hz, 1H), 7.67 (d,  $J$  = 7.8 Hz, 1H), 7.62-7.60 (m, 1H), 7.45 (ddd,  $J$  = 8.4 Hz, 7.4 Hz, 1.0 Hz, 1H), 7.36-7.31 (m, 6H), 7.30-7.28 (m, 2H), 7.26-7.24 (m, 2H), 4.99 (s, 2H).  $^{13}\text{C}$  NMR (100 MHz,  $\text{CDCl}_3$ )  $\delta$  167.3, 160.6, 138.9, 137.1, 135.3, 133.9, 132.4, 130.6, 130.4, 128.6, 128.4, 128.3, 128.0, 127.5, 127.1, 124.3, 122.6, 121.6, 117.9, 115.0, 66.9. HRMS (ESI):  $m/z$  calcd for  $\text{C}_{23}\text{H}_{16}\text{BrNO}_3 + \text{Na}^+$ : 456.0206 [ $M + \text{Na}^+$ ]; found: 456.0226.

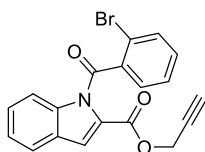

#### Ethynyl 1-(2-bromobenzoyl)-1H-indole-2-carboxylate (**R11**)

**R11** was synthesized by **General Procedure 2** on a 1 mmol scale and isolated by flash chromatography (petroleum ether/ethyl acetate v/v =5:1) yielding a white solid (267.5 mg, 70% yield).  $^1\text{H}$  NMR (400 MHz,  $\text{CDCl}_3$ )  $\delta$  7.95 (d,  $J$  = 8.5 Hz, 1H), 7.70-7.66 (m, 2H), 7.46 (ddd,  $J$  = 8.4 Hz, 7.3 Hz, 1.1 Hz, 1H), 7.41 (s, 1H), 7.38-7.33 (m, 4H), 4.53 (d,  $J$  = 2.4 Hz, 2H), 2.43 (t,  $J$  = 2.4 Hz, 1H).  $^{13}\text{C}$  NMR (100 MHz,  $\text{CDCl}_3$ )  $\delta$  167.1, 159.9, 139.0, 137.0, 134.0, 132.5, 130.7, 129.6, 128.2, 127.4, 127.2, 124.3, 122.7, 121.6, 118.6, 115.0, 76.9, 75.4, 52.7. HRMS (ESI):  $m/z$  calcd for  $\text{C}_{19}\text{H}_{12}\text{BrNO}_3 + \text{H}^+$ : 382.0073 [ $M + \text{H}^+$ ]; found: 382.0070.

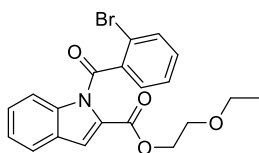

2-Ethoxyethyl 1-(2-bromobenzoyl)-1H-indole-2-carboxylate (**R12**)

**R12** was synthesized by **General Procedure 2** on a 1 mmol scale and isolated by flash chromatography (petroleum ether/ethyl acetate v/v =5:1) yielding a white solid (279.7 mg, 64% yield).  $^1\text{H}$  NMR (400 MHz,  $\text{CDCl}_3$ )  $\delta$  7.92 (dd,  $J = 8.4$  Hz, 0.5 Hz, 1H), 7.68-7.64 (m, 2H), 7.44 (ddd,  $J = 8.5$  Hz, 7.2 Hz, 1.2 Hz, 1H), 7.39-7.32 (m, 5H), 4.09 (t,  $J = 5.0$ , 2H), 3.52 (t,  $J = 5.0$ , 2H), 3.48 (q,  $J = 7.0$  Hz, 2H), 1.19 (t,  $J = 7.0$  Hz, 3H).  $^{13}\text{C}$  NMR (125 MHz,  $\text{CDCl}_3$ )  $\delta$  167.4, 160.9, 138.8, 137.1, 133.9, 132.4, 130.7, 130.5, 127.9, 127.6, 127.1, 124.2, 122.6, 121.6, 117.8, 114.9, 67.9, 66.6, 64.5, 15.1. HRMS (ESI):  $m/z$  calcd for  $\text{C}_{20}\text{H}_{18}\text{BrNO}_4 + \text{H}^+$ : 416.0492 [ $M + \text{H}^+$ ]; found: 416.0496

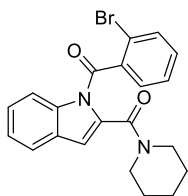

(1-(2-Bromobenzoyl)-1H-indol-2-yl)(piperidin-1-yl) methanone (**R13**)

**R13** was synthesized on a 1 mmol scale and isolated by flash chromatography (petroleum ether/ethyl acetate v/v =5:2) yielding a white solid (226.2 mg, 55% yield).  $^1\text{H}$  NMR (400 MHz,  $\text{CDCl}_3$ )  $\delta$  7.63-7.61 (dd,  $J = 7.8$  Hz, 1.2 Hz, 1H), 7.58-7.55 (m, 2H), 7.49 (br, 1H), 7.43 (td,  $J = 7.4$  Hz, 1.3 Hz, 1H), 7.38 (td,  $J = 7.5$  Hz, 1.8 Hz, 1H), 7.29-7.25 (m, 2H), 3.52 (t,  $J = 5.2$  Hz, 2H), 3.39 (t,  $J = 5.2$  Hz, 2H), 1.64-1.48 (m, 6H).  $^{13}\text{C}$  NMR (100 MHz,  $\text{CDCl}_3$ )  $\delta$  166.8, 161.5, 137.1, 136.5, 133.2, 132.9, 132.1, 130.8, 128.8, 127.4, 126.0, 124.1, 121.6, 120.4, 114.9, 111.1, 48.4, 42.6, 25.9, 25.2, 24.5. HRMS (ESI):  $m/z$  calcd for  $\text{C}_{21}\text{H}_{19}\text{BrN}_2\text{O}_2 + \text{H}^+$ : 411.0703 [ $M + \text{H}^+$ ]; found: 411.0703.

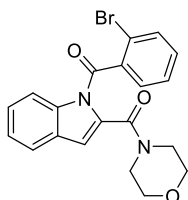

(1-(2-Bromobenzoyl)-1H-indol-2-yl)(morpholino)methanone (**R14**)

**R14** was synthesized on a 1 mmol scale and isolated by flash chromatography (petroleum ether/ethyl acetate v/v =2:1) yielding a white solid (272.8 mg, 66% yield).  $^1\text{H}$  NMR (500 MHz,  $\text{CDCl}_3$ )  $\delta$  7.63 (dd,  $J = 7.9$ , 1.1 Hz, 1H), 7.59 (q,  $J = 3.6$ , 1H), 7.57 (d,  $J = 2.0$ , 1H), 7.47-7.40 (m, 3H), 7.30-7.27 (m, 2H), 6.76 (s, 1H), 3.64 (s, 4H), 3.64 (s, 2H), 3.64 (s, 2H).  $^{13}\text{C}$  NMR (125 MHz,  $\text{CDCl}_3$ )  $\delta$  166.8, 161.9, 137.1, 136.6, 133.1, 132.3, 132.2, 130.9, 128.6, 127.6, 126.4, 124.2, 121.8, 120.3, 114.8, 111.9, 66.4, 66.2, 47.8, 42.1. HRMS (ESI):  $m/z$  calcd for  $\text{C}_{20}\text{H}_{17}\text{BrN}_2\text{O}_3 + \text{H}^+$ : 413.0495 [ $M + \text{H}^+$ ]; found: 413.0494.

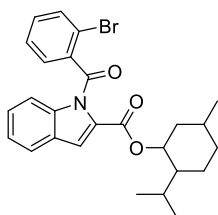

2-Isopropyl-5-methylcyclohexyl 1-(2-bromobenzoyl)-1H-indole-2-carboxylate (**R15**)

**R15** was synthesized by **General Procedure 2** on a 1 mmol scale and isolated by flash chromatography (petroleum ether/ethyl acetate v/v=10:1) yielding a white solid (207.4 mg, 43% yield). <sup>1</sup>H NMR (400 MHz, CDCl<sub>3</sub>) δ 8.06 (d, *J*=8.4 Hz, 1H), 7.67 (d, *J*=7.8 Hz, 1H), 7.65-7.63 (m, 1H), 7.46 (td, *J*=7.8 Hz, 1.0 Hz, 1H), 7.35-7.30 (m, 4H), 7.29 (s, 1H), 1.77 (quintd, *J*=7.8 Hz, 4.4 Hz, 1H), 1.66-1.57 (m, 3H), 1.46-1.38 (m, 2H), 0.97 (qd, *J*=12.6 Hz, 2.4 Hz, 1H), 0.87-0.77 (m, 8H), 0.63 (d, *J*=7.0 Hz, 3H). <sup>13</sup>C NMR (125 MHz, CDCl<sub>3</sub>) δ 167.5, 160.3, 139.1, 137.4, 133.9, 132.3, 131.2, 130.6, 127.8, 127.5, 127.1, 124.2, 122.5, 121.7, 117.2, 115.0, 75.5, 46.8, 40.3, 34.1, 31.2, 26.3, 23.4, 22.0, 20.7, 16.4. HRMS (ESI): *m/z* calcd for C<sub>26</sub>H<sub>28</sub>BrNO<sub>3</sub>+H<sup>+</sup>: 482.1325 [*M*+H<sup>+</sup>]; found: 482.13192.

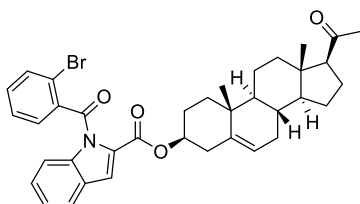

(3S,8S,9S,10R,13S,14S,17S)-17-Acetyl-10,13-dimethyl-2,3,4,7,8,9,10,11,12,13,14,15,16,17-tetradecahydro-1H-cyclopenta[a]phenanthren-3-yl 1-(2-bromobenzoyl)-1H-indole-2-carboxylate (**R16**)

**R16** was synthesized by **General Procedure 2** on a 1 mmol scale and isolated by flash chromatography (petroleum ether/ethyl acetate v/v=5:1) yielding a white solid (289.2 mg, 45% yield). <sup>1</sup>H NMR (400 MHz, CDCl<sub>3</sub>) δ 7.94 (d, *J*=8.4 Hz, 1H), 7.68-7.66 (m, 2H), 7.43 (t, *J*=7.8 Hz, 1H), 7.36-7.31 (m, 5H), 5.30-5.29 (m, 1H), 4.53-4.45 (m, 1H), 2.53 (t, *J*=8.8 Hz, 1H), 2.24-2.17 (m, 2H), 2.12 (s, 3H), 2.08-1.97 (m, 3H), 1.82 (dt, *J*=13.4 Hz, 3.4 Hz, 1H), 1.68-1.43 (m, 10H), 1.26-1.06 (m, 3H), 1.01 (s, 3H), 0.63 (s, 3H). <sup>13</sup>C NMR (125 MHz, CDCl<sub>3</sub>) δ 209.6, 167.2, 160.3, 139.4, 138.9, 137.2, 134.0, 132.4, 131.2, 130.8, 127.7, 127.6, 127.2, 124.2, 122.6, 122.5, 121.8, 117.3, 114.9, 75.2, 63.7, 56.8, 49.8, 44.0, 38.8, 37.6, 36.9, 36.6, 31.8, 31.7, 31.6, 27.3, 24.5, 22.8, 21.0, 19.3, 13.2. HRMS (ESI): *m/z* calcd for C<sub>37</sub>H<sub>40</sub>BrNO<sub>4</sub>+H<sup>+</sup>: 642.2213 [*M*+H<sup>+</sup>]; found: 642.22106.

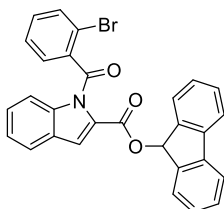

9H-Fluoren-9-yl 1-(2-bromobenzoyl)-1H-indole-2-carboxylate (**R17**)

**R17** was synthesized by **General Procedure 2** on a 1 mmol scale and isolated by flash chromatography (petroleum ether/ethyl acetate v/v=10:1) yielding a white solid (320.3 mg, 63% yield). <sup>1</sup>H NMR (500 MHz, CDCl<sub>3</sub>) δ 7.98 (d, *J*=8.5 Hz, 1H), 7.61 (d, *J*=7.5 Hz, 3H), 7.55 (d, *J*=7.7 Hz, 1H), 7.43 (t, *J*=7.8 Hz, 1H), 7.37-7.34 (m, 3H), 7.30-7.23 (m, 4H), 7.21-7.15 (m, 4H), 6.59 (s, 1H). <sup>13</sup>C NMR (125 MHz, CDCl<sub>3</sub>) δ 167.4, 161.4, 141.4, 141.1, 139.4, 137.3, 134.0, 132.4, 130.5, 130.0, 129.6, 128.2, 127.9, 127.4, 127.1, 126.1, 124.3, 122.7, 121.9, 120.0, 118.8, 114.9, 76.0. HRMS (ESI): *m/z* calcd for C<sub>29</sub>H<sub>18</sub>BrNO<sub>3</sub>+H<sup>+</sup>: 508.0543 [*M*+H<sup>+</sup>]; found: 508.05361.

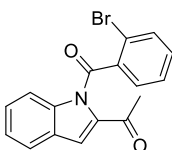

1-(1-(2-Bromobenzoyl)-1H-indol-2-yl)ethan-1-one (**R18**)

**R18** was synthesized by **General Procedure 1** on a 1 mmol scale and isolated by flash chromatography (petroleum ether/ethyl acetate v/v =5:1) yielding a white solid (147.1 mg, 43% yield). <sup>1</sup>H NMR (500 MHz, CDCl<sub>3</sub>) δ 7.86 (d, *J* = 8.5 Hz, 1H), 7.65 (d, *J* = 7.9 Hz, 1H), 7.58-7.56 (m, 1H), 7.41 (ddd, *J* = 8.4 Hz, 7.3 Hz, 1.1 Hz, 1H), 7.29-7.26 (m, 5H), 2.30 (s, 3H). <sup>13</sup>C NMR (125 MHz, CDCl<sub>3</sub>) δ 188.4, 167.0, 138.4, 137.5, 136.4, 132.8, 131.3, 129.5, 127.5, 126.3, 126.0, 123.1, 121.9, 120.2, 116.6, 113.6, 26.1. HRMS (ESI): *m/z* calcd for C<sub>17</sub>H<sub>12</sub>BrNO<sub>2</sub>+H<sup>+</sup>: 342.0124 [*M*+H<sup>+</sup>]; found: 342.0123.

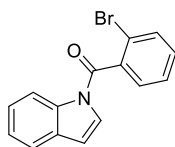

(2-Bromophenyl)(1H-indol-1-yl)methanone (**R19**)<sup>S10</sup>

**R19** was synthesized by **General Procedure 1** on a 1 mmol scale and isolated by flash chromatography (petroleum ether/ethyl acetate v/v =5:1) yielding a colorless oil (249.1 mg, 83% yield). <sup>1</sup>H NMR (400 MHz, CDCl<sub>3</sub>) δ 8.45 (s, 1H), 7.70 (d, *J* = 7.9 Hz, 1H), 7.59 (d, *J* = 7.7 Hz, 1H), 7.50-7.47 (m, 2H), 7.44-7.38 (m, 2H), 7.33 (td, *J* = 7.6 Hz, 0.8 Hz, 1H), 6.96 (s (br), 1H), 6.61 (d, *J* = 3.8 Hz, 1H).

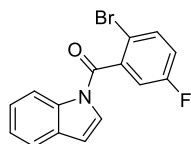

(2-Bromo-5-fluorophenyl)(1H-indol-1-yl)methanone (**R20**)

**R20** was synthesized by **General Procedure 1** on a 1 mmol scale and isolated by flash chromatography (petroleum ether/ethyl acetate v/v =40:1) yielding a white solid (286.3 mg, 90% yield). <sup>1</sup>H NMR (400 MHz, CDCl<sub>3</sub>) δ 8.49 (s (br), 1H), 7.64 (dd, *J* = 8.8 Hz, 4.8 Hz, 1H), 7.58 (d, *J* = 7.7 Hz, 1H), 7.40 (t, *J* = 7.6 Hz, 1H), 7.33 (t, *J* = 7.5 Hz, 1H), 7.24-7.20 (m, 1H), 7.13 (td, *J* = 8.5 Hz, 3.0 Hz, 1H), 6.92 (s (br), 1H), 6.62 (d, *J* = 3.8 Hz, 1H). <sup>13</sup>C NMR (125 MHz, CDCl<sub>3</sub>) δ 165.19, 161.68 (d, *J* = 249.4 Hz), 138.40 (d, *J* = 27.4 Hz), 135.40, 134.93 (d, *J* = 32.2 Hz), 131.09, 126.33, 125.51, 124.66, 121.24, 119.18 (d, *J* = 89.4 Hz), 116.58, 116.33 (d, *J* = 96.7 Hz), 114.07 (d, *J* = 14.3 Hz), 110.35. <sup>19</sup>F NMR (375 MHz, CDCl<sub>3</sub>) δ -112.5. HRMS (ESI): *m/z* calcd for C<sub>15</sub>H<sub>9</sub>BrFNO+H<sup>+</sup>: 317.9924 [*M*+H<sup>+</sup>]; found: 317.9926.

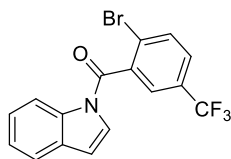

(2-Bromo-5-(trifluoromethyl)phenyl)(1H-indol-1-yl)methanone (**R21**)

**R21** was synthesized by **General Procedure 1** on a 2 mmol scale and isolated by flash chromatography (petroleum ether/ethyl acetate v/v =50:1) yielding colorless oil (221.4 mg, 60% yield). <sup>1</sup>H NMR (500 MHz, CDCl<sub>3</sub>) δ 8.48 (s, 1H), 7.76 (d, *J* = 8.4 Hz, 1H), 7.68 (d, *J* = 2.0 Hz, 1H), 7.58 (dd, *J* = 8.4 Hz, 1.9 Hz, 1H), 7.52 (d, *J* = 7.9 Hz, 1H), 7.34 (s, 1H), 7.27 (t, *J* = 7.5 Hz, 1H), 6.77 (s, 1H), 6.57 (d, *J* = 3.7 Hz, 1H). <sup>13</sup>C NMR (125 MHz, CDCl<sub>3</sub>) δ 165.3, 137.9, 135.5, 134.1, 131.2, 130.6 (q, *J* = 3.4 Hz), 128.4 (q, *J* = 3.4 Hz), 126.2, 126.0 (q, *J* = 3.7 Hz), 125.7, 124.9, 123.9, 123.1 (q, *J* = 270.8 Hz), 121.3, 116.8, 110.7. <sup>19</sup>F NMR (300 MHz, CDCl<sub>3</sub>) δ -62.8. HRMS (ESI): *m/z* calcd for C<sub>16</sub>H<sub>9</sub>BrF<sub>3</sub>NO+H<sup>+</sup>: 367.9892 [*M*+H<sup>+</sup>]; found: 367.9894.

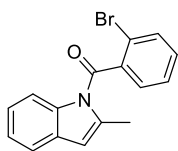

(2-Bromophenyl)(2-methyl-1H-indol-1-yl) methanone **R22**<sup>S9</sup>

**R22** was synthesized by **General Procedure 1** on a 1 mmol scale and isolated by flash chromatography (petroleum ether/ethyl acetate v/v=40:1) yielding colorless oil (94.3 mg, 30% yield). <sup>1</sup>H NMR (500 MHz, CDCl<sub>3</sub>) δ 7.66 (d, *J* = 7.7 Hz, 1H), 7.48-7.40 (m, 4H), 7.36 (d, *J* = 8.3 Hz, 1H), 7.20 (td, *J* = 7.5 Hz, 0.9 Hz, 1H), 7.11 (td, *J* = 7.8 Hz, 1.2 Hz, 1H), 6.41 (s, 1H), 3.39 (d, *J* = 0.9 Hz, 3H).

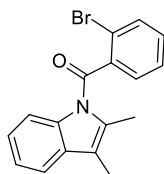

(2-Bromophenyl)(2,3-dimethyl-1H-indol-1-yl) methanone (**R23**)<sup>S10</sup>

**R23** was synthesized by **General Procedure 1** on a 1 mmol scale and isolated by flash chromatography (petroleum ether/ethyl acetate v/v=100:1) yielding colorless oil (98.5 mg, 30% yield). <sup>1</sup>H NMR (500 MHz, CDCl<sub>3</sub>) δ 7.66 (d, *J* = 7.9 Hz, 1H), 7.46–7.45 (m, 2H), 7.43–7.38 (m, 2H), 7.29 (d, *J* = 8.1 Hz, 1H), 7.24 (ddd, *J* = 7.8, 7.2, 0.7 Hz, 1H), 7.11 (ddd, *J* = 8.4, 7.2, 1.1 Hz, 1H), 2.20 (s, 6H).

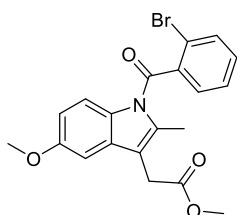

Methyl 2-(1-(2-bromobenzoyl)-5-methoxy-2-methyl-1H-indol-3-yl)acetate (**R24**)

**R24** was synthesized by **General Procedure 1** on a 1 mmol scale and isolated by flash chromatography (petroleum ether/ethyl acetate v/v=10:1) yielding a yellow oil (149.8 mg, 36% yield). <sup>1</sup>H NMR (500 MHz, CDCl<sub>3</sub>) δ 7.65 (d, *J* = 7.8 Hz, 1H), 7.46-7.43 (m, 2H), 7.41-7.38 (m, 1H), 7.21 (d, *J* = 9.0 Hz, 1H), 7.94 (d, *J* = 2.5 Hz, 1H), 6.72 (dd, *J* = 9.0 Hz, 2.5 Hz, 1H), 3.83 (s, 3H), 3.68 (s, 3H), 3.64 (s, 2H), 2.22 (s, 1H). <sup>13</sup>C NMR (125 MHz, CDCl<sub>3</sub>) δ 171.2, 167.2, 156.6, 138.5, 135.4, 133.5, 132.0, 131.3, 130.4, 129.3, 127.9, 120.2, 115.7, 113.8, 112.0, 101.5, 55.7, 52.2, 30.2, 13.7. HRMS (ESI): *m/z* calcd for C<sub>20</sub>H<sub>18</sub>BrNO<sub>4</sub>+H<sup>+</sup>: 416.0492 [*M*+H<sup>+</sup>]; found: 416.0492.

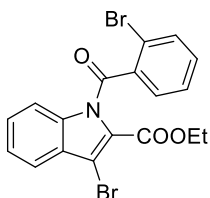

Ethyl 3-bromo-1-(2-bromobenzoyl)-1H-indole-2-carboxylate (**R25**)

**R25** was synthesized by **General Procedure 1** on a 0.9 mmol scale and isolated by flash chromatography (petroleum ether/ethyl acetate v/v=5:1) yielding a colorless oil (337.0 mg, 83% yield). <sup>1</sup>H NMR (400 MHz, CDCl<sub>3</sub>) δ 7.73 (d, *J* = 8.2 Hz, 1H), 7.70-7.66 (m, 2H), 7.45 (td, *J* = 7.2 Hz, 1.4 Hz, 1H), 7.41-7.38 (m, 4H), 4.04 (q, *J* = 7.1

Hz, 2H), 1.22 (t,  $J = 7.1$  Hz, 3H).  $^{13}\text{C}$  NMR (100 MHz,  $\text{CDCl}_3$ )  $\delta$  166.1, 160.3, 136.4, 136.3, 134.0, 132.8, 130.7, 128.6, 128.3, 128.2, 127.4, 124.8, 121.6, 121.4, 114.8, 107.1, 62.0, 14.0. HRMS (ESI):  $m/z$  calcd for  $\text{C}_{18}\text{H}_{13}\text{Br}_2\text{NO}_3+\text{Na}^+$ : 471.9154 [ $M+\text{Na}^+$ ]; found: 471.9162

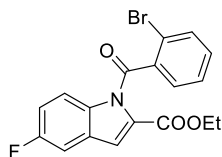

Ethyl 1-(2-bromobenzoyl)-5-fluoro-1H-indole-2-carboxylate (**R26**)

**R26** was synthesized by **General Procedure 1** on a 0.6 mmol scale and isolated by flash chromatography (petroleum ether/ethyl acetate v/v =5:1) yielding a white solid (215.4 mg, 92% yield).  $^1\text{H}$  NMR (500 MHz,  $\text{CDCl}_3$ )  $\delta$  8.01 (dd,  $J = 9.2$  Hz, 4.6 Hz, 1H), 7.67-7.66 (m, 1H), 7.37-7.34 (m, 3H), 7.32 (dd,  $J = 8.4$  Hz, 2.6 Hz, 1H), 7.25 (s, 1H), 7.19 (td,  $J = 9.1$  Hz, 2.6 Hz, 1H), 3.97 (q,  $J = 7.2$  Hz, 2H), 1.14 (t,  $J = 7.2$  Hz, 3H).  $^{13}\text{C}$  NMR (125 MHz,  $\text{CDCl}_3$ )  $\delta$  167.1, 160.6, 159.9 (d,  $J = 240.0$  Hz), 136.9, 135.1, 134.0, 132.5, 132.3, 130.6, 128.3 (d,  $J = 10.1$  Hz), 127.1, 121.6, 116.6 (d,  $J = 4.1$  Hz), 116.4 (d,  $J = 9.1$  Hz), 116.0 (d,  $J = 25.0$  Hz), 107.6 (d,  $J = 23.7$  Hz), 61.6, 14.0.  $^{19}\text{F}$  NMR (375 MHz,  $\text{CDCl}_3$ )  $\delta$  -118.3. HRMS (ESI):  $m/z$  calcd for  $\text{C}_{18}\text{H}_{13}\text{FBrNO}_3+\text{H}^+$ : 390.0136 [ $M+\text{H}^+$ ]; found: 390.0131.

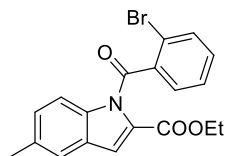

Ethyl 1-(2-bromobenzoyl)-5-methyl-1H-indole-2-carboxylate (**R27**)

**R27** was synthesized by **General Procedure 1** on a 0.6 mmol scale and isolated by flash chromatography (petroleum ether/ethyl acetate v/v =10:1) yielding a white solid (171.5 mg, 74% yield).  $^1\text{H}$  NMR (500 MHz,  $\text{CDCl}_3$ )  $\delta$  7.87 (d,  $J = 8.6$  Hz, 1H), 7.67-7.65 (m, 1H), 7.44 (s, 1H), 7.34-7.32 (m, 3H), 7.26 (dd,  $J = 8.4$  Hz, 1.0 Hz, 1H), 7.23 (s, 1H), 3.97 (q,  $J = 7.2$  Hz, 2H), 2.46 (s, 3H), 1.14 (t,  $J = 7.2$  Hz, 3H).  $^{13}\text{C}$  NMR (125 MHz,  $\text{CDCl}_3$ )  $\delta$  167.1, 161.0, 137.2, 137.1, 133.9, 133.9, 132.3, 130.9, 130.5, 129.4, 127.8, 127.1, 122.1, 121.6, 117.3, 114.7, 61.4, 21.3, 14.1. HRMS (ESI):  $m/z$  calcd for  $\text{C}_{19}\text{H}_{16}\text{BrNO}_3+\text{H}^+$ : 386.0386 [ $M+\text{H}^+$ ]; found: 386.0388.

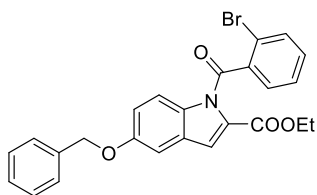

Ethyl 5-(benzyloxy)-1-(2-bromobenzoyl)-1H-indole-2-carboxylate (**R28**)

**R28** was synthesized by **General Procedure 1** on a 0.8 mmol scale and isolated by flash chromatography (petroleum ether/ethyl acetate v/v =5:1) yielding a white solid (306.2 mg, 80% yield).  $^1\text{H}$  NMR (500 MHz,  $\text{CDCl}_3$ )  $\delta$  7.95 (d,  $J = 9.9$  Hz, 1H), 7.67-7.65 (m, 1H), 7.47 (d,  $J = 7.4$  Hz, 2H), 7.41 (t,  $J = 7.5$  Hz, 2H), 7.36-7.33 (m, 4H), 7.22 (s, 1H), 7.16-7.15 (m, 2H), 5.13 (s, 2H), 3.96 (q,  $J = 7.1$  Hz, 2H), 1.14 (t,  $J = 7.1$  Hz, 3H).  $^{13}\text{C}$  NMR (100 MHz,  $\text{CDCl}_3$ )  $\delta$  167.0, 160.9, 156.0, 137.2, 136.9, 133.9, 133.8, 132.3, 131.4, 130.5, 128.7, 128.4, 128.1, 127.5, 127.1, 121.6, 117.9, 117.3, 116.2, 105.4, 70.6, 61.5, 14.0. HRMS (ESI):  $m/z$  calcd for  $\text{C}_{25}\text{H}_{20}\text{BrNO}_4+\text{H}^+$ : 478.0648 [ $M+\text{H}^+$ ]; found: 478.0645

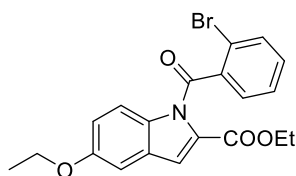

Ethyl 1-(2-bromobenzoyl)-5-ethoxy-1H-indole-2-carboxylate (**R29**)

**R29** was synthesized by **General Procedure 1** on a 0.7 mmol scale and isolated by flash chromatography (petroleum ether/ethyl acetate v/v =5:1) yielding a white solid (273.9 mg, 94% yield).  $^1\text{H}$  NMR (500 MHz,  $\text{CDCl}_3$ )  $\delta$  7.93 (d,  $J$  = 9.8 Hz, 1H), 7.67-7.65 (m, 1H), 7.34 (m, 3H), 7.22 (s, 1H), 7.07-7.05 (m, 2H), 4.08 (q,  $J$  = 7.0 Hz, 2H), 3.96 (q,  $J$  = 7.1 Hz, 2H), 1.45 (t,  $J$  = 7.0 Hz, 3H), 1.13 (t,  $J$  = 7.1 Hz, 3H).  $^{13}\text{C}$  NMR (100 MHz,  $\text{CDCl}_3$ )  $\delta$  167.0, 160.9, 156.2, 137.2, 133.9, 133.6, 132.3, 131.3, 130.5, 128.4, 127.1, 121.6, 117.6, 117.3, 116.1, 104.8, 64.0, 61.4, 14.9, 14.0. HRMS (ESI):  $m/z$  calcd for  $\text{C}_{20}\text{H}_{18}\text{BrNO}_4 + \text{H}^+$ : 416.0492 [ $M + \text{H}^+$ ]; found: 416.0499.

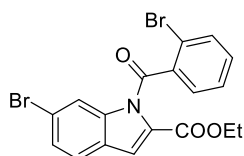

Ethyl 6-bromo-1-(2-bromobenzoyl)-1H-indole-2-carboxylate (**R30**)

**R30** was synthesized by **General Procedure 1** on a 0.9 mmol scale and isolated by flash chromatography (petroleum ether/ethyl acetate v/v =5:1) yielding a white solid (373.5 mg, 92% yield).  $^1\text{H}$  NMR (400 MHz,  $\text{CDCl}_3$ )  $\delta$  8.30 (s, 1H), 7.67-7.65 (m, 1H), 7.53 (d,  $J$  = 8.4 Hz, 1H), 7.45 (dd,  $J$  = 8.4 Hz, 1.7 Hz, 1H), 7.36-7.32 (m, 3H), 7.25 (s, 1H), 3.95 (q,  $J$  = 7.1 Hz, 2H), 1.13 (t,  $J$  = 7.1 Hz, 3H).  $^{13}\text{C}$  NMR (125 MHz,  $\text{CDCl}_3$ )  $\delta$  167.1, 160.5, 139.3, 136.8, 134.0, 132.6, 131.3, 130.6, 127.8, 127.1, 126.3, 123.5, 121.8, 121.7, 118.3, 116.8, 61.6, 14.0. HRMS (ESI):  $m/z$  calcd for  $\text{C}_{18}\text{H}_{13}\text{Br}_2\text{NO}_3 + \text{H}^+$ : 449.9335 [ $M + \text{H}^+$ ]; found: 449.9327.

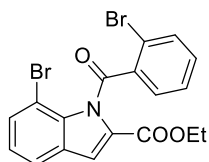

Ethyl 7-bromo-1-(2-bromobenzoyl)-1H-indole-2-carboxylate (**R31**)

**R31** was synthesized by **General Procedure 1** on a 2 mmol scale and isolated by flash chromatography (petroleum ether/ethyl acetate v/v =5:1) yielding a white solid (117.3 mg, 13% yield).  $^1\text{H}$  NMR (500 MHz,  $\text{CDCl}_3$ )  $\delta$  7.78 (d,  $J$  = 7.9 Hz, 1H), 7.70 (d,  $J$  = 7.9 Hz, 1H), 7.55 (d,  $J$  = 7.6 Hz, 1H), 7.44 (dd,  $J$  = 7.8 Hz, 1.6 Hz, 1H), 7.40 (s, 1H), 7.38 (td,  $J$  = 7.5 Hz, 1.2 Hz, 1H), 7.30 (t,  $J$  = 7.4 Hz, 1H), 7.12 (t,  $J$  = 7.8 Hz, 1H), 4.23 (q,  $J$  = 7.1 Hz, 2H), 1.23 (t,  $J$  = 7.1 Hz, 3H).  $^{13}\text{C}$  NMR (125 MHz,  $\text{CDCl}_3$ )  $\delta$  167.6, 160.6, 136.2, 135.6, 135.1, 134.0, 133.4, 131.0, 130.6, 129.4, 127.4, 124.2, 123.2, 122.0, 112.6, 105.2, 61.6, 14.1. HRMS (ESI):  $m/z$  calcd for  $\text{C}_{18}\text{H}_{13}\text{Br}_2\text{NO}_3 + \text{Na}^+$ : 471.9154 [ $M + \text{Na}^+$ ]; found: 471.9156.

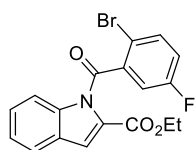

Ethyl 1-(2-bromo-5-fluorobenzoyl)-1H-indole-2-carboxylate (**R32**)

**R32** was synthesized by **General Procedure 1** on a 1 mmol scale and isolated by flash chromatography (petroleum ether/ethyl acetate v/v=5:1) yielding a white solid (296.6 mg, 76% yield).  $^1\text{H}$  NMR (500 MHz,  $\text{CDCl}_3$ )  $\delta$  8.01 (dd,  $J$  = 8.5 Hz, 0.6 Hz, 1H), 7.67 (d,  $J$  = 7.9 Hz, 1H), 7.60 (dd,  $J$  = 8.8 Hz, 5.0 Hz, 1H), 7.46 (ddd,  $J$  = 8.4 Hz, 7.3 Hz, 1.2 Hz, 1H), 7.36-7.33 (m, 2H), 7.11 (dd,  $J$  = 8.2 Hz, 3.0 Hz, 1H), 7.07 (dd,  $J$  = 8.7 Hz, 7.7 Hz, 3.0 Hz, 1H), 4.05 (q,  $J$  = 7.1 Hz, 2H), 1.17 (t,  $J$  = 7.1 Hz, 3H).  $^{13}\text{C}$  NMR (100 MHz,  $\text{CDCl}_3$ )  $\delta$  166.10 (d,  $J$  = 1.0 Hz), 162.45, 161.21 (d,  $J$  = 249 Hz), 160.73, 138.79, 138.67 (d,  $J$  = 6.8 Hz), 135.28 (d,  $J$  = 7.7 Hz), 130.58, 128.07, 127.57, 124.48, 122.62, 119.64 (d,  $J$  = 22.1 Hz), 118.04 (d,  $J$  = 2.8 Hz), 117.78, 115.86 (d,  $J$  = 3.4 Hz), 115.04, 61.55, 14.06.  $^{19}\text{F}$  NMR (300 MHz,  $\text{CDCl}_3$ )  $\delta$  -113.48. HRMS (ESI):  $m/z$  calcd for  $\text{C}_{18}\text{H}_{13}\text{FBrNO}_3 + \text{H}^+$ : 390.0136 [ $M + \text{H}^+$ ]; found: 390.0136.

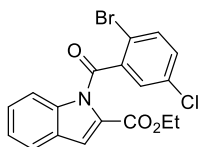

Ethyl 1-(2-bromo-5-chlorobenzoyl)-1H-indole-2-carboxylate (**R33**)

**R33** was synthesized by **General Procedure 1** on a 1 mmol scale and isolated by flash chromatography (petroleum ether/ethyl acetate v/v=2:1) yielding a white solid (394.5 mg, 97% yield).  $^1\text{H}$  NMR (500 MHz,  $\text{CDCl}_3$ )  $\delta$  8.04 (dd,  $J$  = 8.5 Hz, 0.6 Hz, 1H), 7.68 (d,  $J$  = 7.8 Hz, 1H), 7.58 (d,  $J$  = 8.5 Hz, 1H), 7.47 (ddd,  $J$  = 8.5 Hz, 7.3 Hz, 1.2 Hz, 1H), 7.37-7.30 (m, 4H), 4.05 (q,  $J$  = 7.1 Hz, 2H), 1.18 (t,  $J$  = 7.1 Hz, 3H).  $^{13}\text{C}$  NMR (125 MHz,  $\text{CDCl}_3$ )  $\delta$  166.0, 160.8, 138.8, 138.6, 135.0, 133.4, 132.2, 130.6, 130.4, 128.1, 127.6, 124.5, 122.6, 119.5, 118.0, 115.1, 61.6, 14.0. HRMS (ESI):  $m/z$  calcd for  $\text{C}_{18}\text{H}_{13}\text{ClBrNO}_3 + \text{Na}^+$ : 427.9660 [ $M + \text{Na}^+$ ]; found: 427.9669.

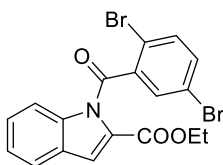

Ethyl 1-(2,5-dibromobenzoyl)-1H-indole-2-carboxylate (**R34**)

**R34** was synthesized by **General Procedure 1** on a 0.5 mmol scale and isolated by flash chromatography (petroleum ether/ethyl acetate v/v=5:1) yielding a white solid (176.0 mg, 78% yield).  $^1\text{H}$  NMR (400 MHz,  $\text{CDCl}_3$ )  $\delta$  7.98 (dd,  $J$  = 8.4 Hz, 0.6 Hz, 1H), 7.61 (d,  $J$  = 7.8 Hz, 1H), 7.44 (d,  $J$  = 8.3 Hz, 1H), 7.43-7.37 (m, 3H), 7.29 (t,  $J$  = 7.7 Hz, 1H), 7.26 (s, 1H), 3.96 (q,  $J$  = 7.1 Hz, 2H), 1.11 (t,  $J$  = 7.1 Hz, 3H).  $^{13}\text{C}$  NMR (125 MHz,  $\text{CDCl}_3$ )  $\delta$  165.85, 160.78, 138.80, 138.77, 135.21, 135.18, 133.12, 130.61, 128.10, 127.59, 124.54, 122.62, 120.89, 120.32, 118.04, 115.14, 61.62, 14.06. HRMS (ESI):  $m/z$  calcd for  $\text{C}_{18}\text{H}_{13}\text{Br}_2\text{NO}_3 + \text{Na}^+$ : 471.9154 [ $M + \text{Na}^+$ ]; found: 471.9160.

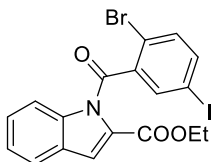

Ethyl 1-(2-bromo-5-iodobenzoyl)-1H-indole-2-carboxylate (**R35**)

**R35** was synthesized by **General Procedure 1** on a 1 mmol scale and isolated by flash chromatography (petroleum ether/ethyl acetate v/v=5:1) yielding a white solid (433.4 mg, 87% yield).  $^1\text{H}$  NMR (500 MHz,  $\text{CDCl}_3$ )  $\delta$  8.05 (d,  $J$  = 8.5 Hz, 1H), 7.67 (d,  $J$  = 7.8 Hz, 1H), 7.65-7.62 (m, 2H), 7.47 (ddd,  $J$  = 8.4 Hz, 7.3 Hz, 1.2 Hz, 1H), 7.38-7.34 (m, 2H), 7.33 (s, 1H), 4.03 (q,  $J$  = 7.2 Hz, 2H), 1.19 (t,  $J$  = 7.2 Hz, 3H).  $^{13}\text{C}$  NMR (125 MHz,  $\text{CDCl}_3$ )  $\delta$  165.7, 160.8, 141.1, 138.9, 138.8, 138.8, 135.4, 130.7, 128.1, 127.6, 124.5, 122.6, 121.5, 118.0, 115.2, 91.4, 61.6, 14.1. HRMS

(ESI):  $m/z$  calcd for  $C_{18}H_{13}BrINO_3+Na^+$ : 519.9016 [ $M+Na^+$ ]; found: 519.9017.

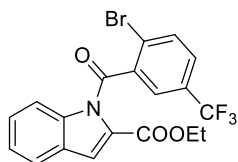

Ethyl 1-(2-bromo-5-(trifluoromethyl)benzoyl)-1H-indole-2-carboxylate (**R36**)

**R36** was synthesized by **General Procedure 1** on a 1 mmol scale and isolated by flash chromatography (petroleum ether/ethyl acetate v/v =10:1) yielding a white solid (220.1 mg, 50% yield).  $^1H$  NMR (500 MHz,  $CDCl_3$ )  $\delta$  8.13 (dd,  $J$  = 8.4 Hz, 0.7 Hz, 1H), 7.80 (d,  $J$  = 8.0 Hz, 1H), 7.69 (d,  $J$  = 7.8 Hz, 1H), 7.58-7.57 (m, 2H), 7.50 (ddd,  $J$  = 8.5 Hz, 7.3 Hz, 1.2 Hz, 1H), 7.38 (t,  $J$  = 7.6 Hz, 1H), 7.35 (d,  $J$  = 0.5 Hz, 1H), 3.97 (q,  $J$  = 7.2 Hz, 2H), 1.12 (t,  $J$  = 7.2 Hz, 3H).  $^{13}C$  NMR (100 MHz,  $CDCl_3$ )  $\delta$  166.0, 160.7, 138.9, 138.1, 134.5, 130.4, 129.5, 128.5 (q,  $J$  = 3.2 Hz), 128.3, 127.6, 127.1 (q,  $J$  = 3.7 Hz), 125.9 (q,  $J$  = 270.7 Hz), 125.7, 124.7, 122.7, 118.4, 115.3.  $^{19}F$  NMR (300 MHz,  $CDCl_3$ )  $\delta$  -62.9. HRMS (ESI):  $m/z$  calcd for  $C_{19}H_{13}F_3BrNO_3+H^+$ : 440.0104 [ $M+H^+$ ]; found: 440.0110.

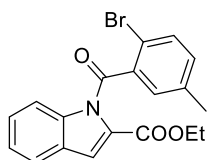

Ethyl 1-(2-bromo-5-methylbenzoyl)-1H-indole-2-carboxylate (**R37**)

**R37** was synthesized by **General Procedure 1** on a 1 mmol scale and isolated by flash chromatography (petroleum ether/ethyl acetate v/v =5:1) yielding a white solid (297.4 mg, 77% yield).  $^1H$  NMR (500 MHz,  $CDCl_3$ )  $\delta$  7.94 (d,  $J$  = 8.4 Hz, 1H), 7.67 (d,  $J$  = 7.8 Hz, 1H), 7.54 (d,  $J$  = 8.8 Hz, 1H), 7.43 (t,  $J$  = 7.5 Hz, 1H), 7.33 (t,  $J$  = 7.3 Hz, 1H), 7.30 (s, 1H), 7.16-7.15 (m, 2H), 4.00 (q,  $J$  = 7.2 Hz, 2H), 2.30 (s, 3H), 1.16 (t,  $J$  = 7.2 Hz, 3H).  $^{13}C$  NMR (100 MHz,  $CDCl_3$ )  $\delta$  167.3, 161.0, 138.7, 137.4, 136.7, 133.8, 133.3, 131.1, 131.0, 127.7, 127.6, 124.2, 122.5, 118.4, 117.1, 115.0, 61.5, 20.7, 14.0. HRMS (ESI):  $m/z$  calcd for  $C_{19}H_{16}BrNO_3+H^+$ : 386.0386 [ $M+H^+$ ]; found: 386.0379.

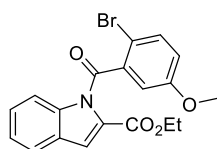

Ethyl 1-(2-bromo-5-methoxybenzoyl)-1H-indole-2-carboxylate (**R38**)

**R38** was synthesized by **General Procedure 1** on a 1 mmol scale and isolated by flash chromatography (petroleum ether/ethyl acetate v/v =5:1) yielding a white solid (360.0 mg, 90% yield).  $^1H$  NMR (500 MHz,  $CDCl_3$ )  $\delta$  7.95 (d,  $J$  = 8.5 Hz, 1H), 7.64 (d,  $J$  = 7.8 Hz, 1H), 7.50 (d,  $J$  = 9.6 Hz, 1H), 7.41 (t,  $J$  = 7.8 Hz, 1H), 7.30 (t,  $J$  = 7.6 Hz, 1H), 7.28 (s, 1H), 6.89-6.87 (m, 2H), 4.01 (q,  $J$  = 7.1 Hz, 2H), 3.73 (s, 3H), 1.15 (t,  $J$  = 7.1 Hz, 3H).  $^{13}C$  NMR (125 MHz,  $CDCl_3$ )  $\delta$  166.9, 160.9, 158.6, 138.6, 137.6, 134.7, 131.1, 127.7, 127.6, 124.3, 122.5, 118.8, 117.2, 115.9, 111.9, 61.5, 55.7, 14.1. HRMS (ESI):  $m/z$  calcd for  $C_{19}H_{16}BrNO_4+H^+$ : 402.0335 [ $M+H^+$ ]; found: 402.0330.

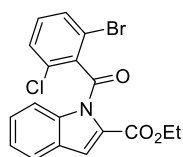

Ethyl 1-(2-bromo-6-chlorobenzoyl)-1H-indole-2-carboxylate (**R39**)

**R39** was synthesized on a 1 mmol scale and isolated by flash chromatography (petroleum ether/ethyl acetate v/v =5:1) yielding a white solid (370.1 mg, 91% yield). <sup>1</sup>H NMR (400 MHz, CDCl<sub>3</sub>) δ 8.04 (d, *J* = 8.4 Hz, 1H), 7.67 (d, *J* = 7.8 Hz, 1H), 7.58 (d, *J* = 8.4 Hz, 1H), 7.55 (ddd, *J* = 8.4 Hz, 7.3 Hz, 1.1 Hz, 1H), 7.38-7.30 (m, 4H), 4.04 (q, *J* = 7.1 Hz, 2H), 1.18 (t, *J* = 7.1 Hz, 3H). <sup>13</sup>C NMR (125 MHz, CDCl<sub>3</sub>) δ 166.0, 160.8, 138.8, 138.5, 135.0, 133.4, 132.3, 130.6, 130.3, 128.1, 127.6, 124.5, 122.6, 119.5, 118.1, 115.1, 61.6, 14.0. HRMS (ESI): *m/z* calcd for C<sub>18</sub>H<sub>13</sub>ClBrNO<sub>3</sub>+H<sup>+</sup>: 405.9840 [*M*+H<sup>+</sup>]; found: 405.9829.

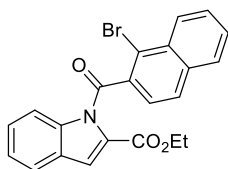

Ethyl 1-(1-bromo-2-naphthoyl)-1H-indole-2-carboxylate (**R40**)

**R40** was synthesized by **General Procedure 1** on a 0.5 mmol scale and isolated by flash chromatography (petroleum ether/ethyl acetate v/v =4:1) yielding a white solid (204.8 mg, 97% yield). <sup>1</sup>H NMR (500 MHz, CDCl<sub>3</sub>) δ 8.37 (d, *J* = 8.3 Hz, 1H), 8.02 (d, *J* = 8.5 Hz, 1H), 7.89-7.86 (m, 2H), 7.69-7.62 (m, 3H), 7.56 (d, *J* = 8.4 Hz, 1H), 7.45 (t, *J* = 7.8 Hz, 1H), 7.35 (t, *J* = 7.6 Hz, 1H), 7.30 (s, 1H), 3.80 (q, *J* = 7.1 Hz, 2H), 0.90 (t, *J* = 7.1 Hz, 3H). <sup>13</sup>C NMR (125 MHz, CDCl<sub>3</sub>) δ 168.3, 161.0, 138.6, 135.3, 135.0, 131.8, 131.1, 128.5, 128.3, 128.2, 127.9, 127.9, 127.8, 126.6, 124.3, 122.5, 117.6, 115.3, 61.4, 13.8. HRMS (ESI): *m/z* calcd for C<sub>22</sub>H<sub>17</sub>BrNO<sub>3</sub><sup>+</sup>: 422.0386; found: 422.0394.

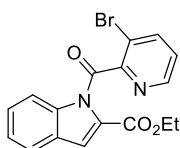

Ethyl 1-(3-bromopyridin-2-yl)-1H-indole-2-carboxylate (**R41**)

**R41** was synthesized by **General Procedure 1** on a 0.5 mmol scale and isolated by flash chromatography (petroleum ether/ethyl acetate v/v =4:1) yielding a white solid (108.2 mg, 58% yield). <sup>1</sup>H NMR (500 MHz, CDCl<sub>3</sub>) δ 8.41 (d, *J* = 3.5 Hz, 1H), 8.35 (d, *J* = 8.5 Hz, 1H), 8.08 (d, *J* = 7.8 Hz, 1H), 7.67 (d, *J* = 7.8 Hz, 1H), 7.50 (t, *J* = 7.8 Hz, 1H), 7.36-7.33 (m, 2H), 7.27-7.25 (m, 1H), 3.94 (q, *J* = 7.1 Hz, 2H), 1.14 (t, *J* = 7.1 Hz, 3H). <sup>13</sup>C NMR (125 MHz, CDCl<sub>3</sub>) δ 165.5, 161.1, 152.0, 146.4, 142.1, 139.3, 131.1, 128.1, 127.6, 126.1, 124.5, 122.5, 120.9, 117.4, 115.8, 61.3, 14.1. HRMS (ESI): *m/z* calcd for C<sub>17</sub>H<sub>13</sub>BrN<sub>2</sub>O<sub>3</sub>+H<sup>+</sup>: 373.0182 [*M*+H<sup>+</sup>]; found: 373.0188.

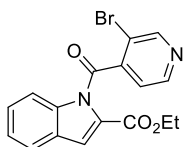

Ethyl 1-(3-bromoisonicotinoyl)-1H-indole-2-carboxylate (**R42**)

**R42** was synthesized by **General Procedure 1** on a 0.5 mmol scale and isolated by flash chromatography (petroleum ether/ethyl acetate v/v =4:1) yielding a white solid (76.5 mg, 41% yield). <sup>1</sup>H NMR (500 MHz, CDCl<sub>3</sub>) δ 8.83 (s, 1H), 8.59 (d, *J* = 4.9 Hz, 1H), 8.16 (d, *J* = 8.5 Hz, 1H), 7.69 (d, *J* = 8.5 Hz, 1H), 7.51 (ddd, *J* = 8.5 Hz, 7.3 Hz, 1.2 Hz, 1H), 7.39-7.37 (m, 2H), 7.25 (d, *J* = 4.9 Hz, 1H), 4.00 (q, *J* = 7.1 Hz, 2H), 1.14 (t, *J* = 7.1 Hz, 3H). <sup>13</sup>C NMR (125 MHz, CDCl<sub>3</sub>) δ 165.6, 160.6, 153.1, 148.2, 144.0, 138.9, 130.2, 128.5, 127.6, 124.8, 123.5, 122.7, 118.8, 118.7, 115.3, 61.7, 14.0. HRMS (ESI): *m/z* calcd for C<sub>17</sub>H<sub>13</sub>BrN<sub>2</sub>O<sub>3</sub>+H<sup>+</sup>: 373.0182 [*M*+H<sup>+</sup>]; found: 373.0178.

## 6. Synthesis and characterization of dearomative products

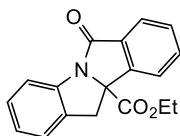

Ethyl 6-oxo-6H-isoindolo[2,1-a]indole-10b(11H)-carboxylate (**1**)<sup>S11</sup>

Purification by flash chromatography (petroleum ether/ethyl acetate v/v =10:1) yielding a white solid (X = Br, 56.9 mg, 97%; X = Cl, 77%; X = I, 86%). <sup>1</sup>H NMR (500 MHz, CDCl<sub>3</sub>)  $\delta$  7.88 (d,  $J$  = 7.5 Hz, 1H), 7.72 (d,  $J$  = 7.5 Hz, 1H), 7.67-7.60 (m, 2H), 7.56-7.52 (td,  $J$  = 7.4 Hz, 1.4 Hz, 1H), 7.31 (t,  $J$  = 7.9 Hz, 1H), 7.23-7.21 (d,  $J$  = 7.5 Hz, 1H), 7.07 (td,  $J$  = 7.5 Hz, 0.6 Hz, 1H), 4.13 (q,  $J$  = 7.1 Hz, 2H), 3.96 (d,  $J$  = 15.8 Hz, 1H), 3.32 (d,  $J$  = 15.8 Hz, 1H), 1.15 (t,  $J$  = 7.1 Hz, 3H).

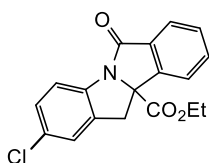

Ethyl 2-chloro-6-oxo-6H-isoindolo[2,1-a]indole-10b(11H)-carboxylate (**2**)

Purification by flash chromatography (petroleum ether/ethyl acetate v/v =10:1) yielding yellow oil (X = Br, 64.9 mg, 99%; X = Cl, 75%; X = I, 84%). <sup>1</sup>H NMR (400 MHz, CDCl<sub>3</sub>)  $\delta$  7.84 (d,  $J$  = 0.9 Hz, 1H), 7.70 (d,  $J$  = 7.8 Hz, 1H), 7.61-7.56 (m, 2H), 7.30 (t,  $J$  = 7.7 Hz, 1H), 7.22 (d,  $J$  = 7.4 Hz, 1H), 7.09 (t,  $J$  = 7.5 Hz, 1H), 4.13 (q,  $J$  = 7.1 Hz, 2H), 3.94 (d,  $J$  = 15.8 Hz, 1H), 3.30 (d,  $J$  = 15.8 Hz, 1H), 1.16 (t,  $J$  = 7.1 Hz, 3H). <sup>13</sup>C NMR (125 MHz, CDCl<sub>3</sub>)  $\delta$  170.8, 166.8, 142.6, 139.7, 136.2, 135.2, 134.0, 133.2, 128.4, 125.3, 125.1, 125.1, 124.3, 116.7, 76.5, 62.8, 38.0, 13.9. HRMS (ESI):  $m/z$  calcd for C<sub>18</sub>H<sub>14</sub>ClNO<sub>3</sub>+H<sup>+</sup>: 328.0735 [ $M$ +H<sup>+</sup>]; found: 328.0745.

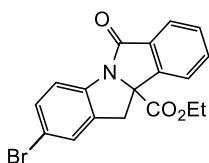

Ethyl 2-bromo-6-oxo-6H-isoindolo[2,1-a]indole-10b(11H)-carboxylate (**3**)

Purification by flash chromatography (petroleum ether/ethyl acetate v/v =10:1) yielding colorless oil (X = Br, 68.5 mg, 92%; X = Cl, 80%; X = I, 99%). <sup>1</sup>H NMR (400 MHz, CDCl<sub>3</sub>)  $\delta$  7.88 (d,  $J$  = 7.5 Hz, 1H), 7.65-7.62 (m, 2H), 7.58 (d,  $J$  = 8.3 Hz, 1H), 7.55 (ddd,  $J$  = 7.8 Hz, 6.0 Hz, 2.5 Hz, 1H), 7.42 (d,  $J$  = 8.3 Hz, 1H), 7.36 (s, 1H), 4.15 (q,  $J$  = 7.1 Hz, 2H), 3.96 (d,  $J$  = 16 Hz, 1H), 3.32 (d,  $J$  = 16 Hz, 1H), 1.16 (t,  $J$  = 7.1 Hz, 3H). <sup>13</sup>C NMR (125 MHz, CDCl<sub>3</sub>)  $\delta$  170.9, 168.2, 144.3, 139.1, 136.4, 133.4, 133.0, 131.2, 129.9, 128.3, 125.2, 123.1, 118.0, 117.7, 76.8, 62.8, 37.8, 13.9. HRMS (ESI):  $m/z$  calcd for C<sub>18</sub>H<sub>14</sub>BrNO<sub>3</sub>+H<sup>+</sup>: 372.0230 [ $M$ +H<sup>+</sup>]; found: 372.0235.

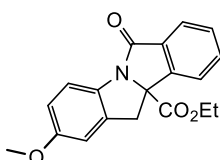

Ethyl 2-methoxy-6-oxo-6H-isoindolo[2,1-a]indole-10b(11H)-carboxylate (**4**)

Purification by flash chromatography (petroleum ether/ethyl acetate v/v =10:1) yielding yellow oil (X = Br, 59.5 mg, 92%; X = Cl, 71%; X = I, 94%). <sup>1</sup>H NMR (400 MHz, CDCl<sub>3</sub>)  $\delta$  7.86 (d,  $J$  = 7.5 Hz, 1H), 7.64-7.58 (m, 3H), 7.52 (td,  $J$  = 7.2 Hz, 1.4 Hz, 1H), 6.83-6.80 (m, 2H), 4.14 (q,  $J$  = 7.1 Hz, 2H), 3.92 (d,  $J$  = 15.8 Hz, 1H), 3.78 (s, 3H), 3.29 (d,  $J$  = 15.8 Hz, 1H), 1.15 (t,  $J$  = 7.1 Hz, 3H). <sup>13</sup>C NMR (100 MHz, CDCl<sub>3</sub>)  $\delta$  171.3, 168.3, 157.3, 144.4, 135.8, 133.6,

133.4, 132.9, 129.7, 124.9, 122.9, 117.2, 112.7, 111.8, 77.2, 62.5, 55.7, 38.2, 13.9. HRMS (ESI):  $m/z$  calcd for  $C_{19}H_{17}NO_4+H^+$ : 324.1230 [ $M+H^+$ ]; found: 324.1238.

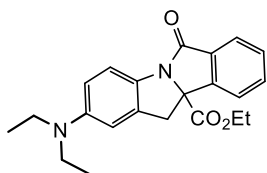

Ethyl 2-(diethylamino)-6-oxo-6H-indolo[2,1-a]indole-10b(11H)-carboxylate (**5**)

Purification by flash chromatography (petroleum ether/ethyl acetate v/v =10:1) yielding yellow oil (51.0 mg, 70% yield).  $^1H$  NMR (500 MHz,  $CDCl_3$ )  $\delta$  7.85 (d,  $J$  = 7.5 Hz, 1H), 7.61 (d,  $J$  = 7.4 Hz, 1H), 7.59-7.54 (m, 2H), 7.51 (td,  $J$  = 7.5 Hz, 1.2 Hz, 1H), 6.60-6.57 (m, 2H), 4.11 (qd,  $J$  = 7.1 Hz, 1.6 Hz, 2H), 3.88 (d,  $J$  = 15.6 Hz, 1H), 3.31 (q,  $J$  = 7.1 Hz, 4H), 3.25 (d,  $J$  = 15.6 Hz, 1H), 1.12-1.16 (m, 9H).  $^{13}C$  NMR (100 MHz,  $CDCl_3$ )  $\delta$  171.6, 168.2, 146.0, 144.4, 135.8, 133.8, 132.6, 129.6, 124.7, 122.7, 117.4, 111.4, 109.3, 77.1, 62.5, 44.8, 38.4, 13.9, 12.5. HRMS (ESI):  $m/z$  calcd for  $C_{22}H_{24}N_2O_3+H^+$ : 365.1860 [ $M+H^+$ ]; found: 365.1856.

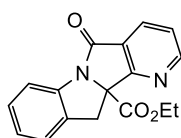

Ethyl 5-oxo-5H-pyrido[2',3':3,4]pyrrolo[1,2-a]indole-11a(11H)-carboxylate (**6**)

Purification by flash chromatography (petroleum ether/ethyl acetate v/v =10:1) yielding a white solid (X = Br, 50.4 mg, 86%; X = Cl, 70%).  $^1H$  NMR (500 MHz,  $CDCl_3$ )  $\delta$  8.79 (dd,  $J$  = 4.9 Hz, 1.5 Hz, 1H), 8.17 (dd,  $J$  = 7.7 Hz, 1.5 Hz, 1H), 7.69 (d,  $J$  = 7.8 Hz, 1H), 7.48 (dd,  $J$  = 7.7 Hz, 5.0 Hz, 1H), 7.32-7.27 (m, 2H), 7.12 (t,  $J$  = 7.4 Hz, 1H), 4.19-4.12 (m, 3H), 3.38 (d,  $J$  = 16.0 Hz, 1H), 1.13 (t,  $J$  = 7.1 Hz, 3H).  $^{13}C$  NMR (125 MHz,  $CDCl_3$ )  $\delta$  169.3, 166.9, 164.2, 153.8, 139.5, 134.3, 133.3, 128.2, 127.6, 125.5, 125.3, 124.5, 116.9, 77.6, 62.9, 35.4, 13.9. HRMS (ESI):  $m/z$  calcd for  $C_{17}H_{14}N_2O_3+H^+$ : 295.1077 [ $M+H^+$ ]; found: 295.10779.

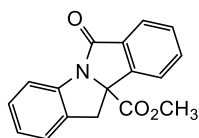

Methyl 6-oxo-6H-indolo[2,1-a]indole-10b(11H)-carboxylate (**7**)

Purification by flash chromatography (petroleum ether/ethyl acetate v/v =10:1) yielding a yellow solid (38.5 mg, 69% yield).  $^1H$  NMR (500 MHz,  $CDCl_3$ )  $\delta$  7.88 (d,  $J$  = 7.6 Hz, 1H), 7.71 (d,  $J$  = 7.8 Hz, 1H), 7.66-7.60 (m, 2H), 7.54 (td,  $J$  = 7.5 Hz, 1.3 Hz, 1H), 7.31 (t,  $J$  = 7.5 Hz, 1H), 7.22 (d,  $J$  = 7.5 Hz, 1H), 7.09 (td,  $J$  = 7.5 Hz, 0.8 Hz, 1H), 3.97 (d,  $J$  = 15.8 Hz, 1H), 3.68 (s, 3H), 3.32 (d,  $J$  = 15.8 Hz, 1H).  $^{13}C$  NMR (125 MHz,  $CDCl_3$ )  $\delta$  172.0, 168.3, 144.5, 140.0, 134.1, 133.3, 133.2, 129.8, 128.3, 125.2, 125.1, 124.9, 123.1, 116.8, 76.7, 53.5, 38.0. HRMS (ESI):  $m/z$  calcd for  $C_{17}H_{13}NO_3+H^+$ : 280.0968 [ $M+H^+$ ]; found: 280.0969.

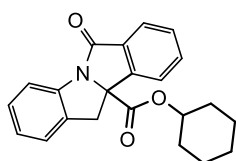

Cyclohexyl 6-oxo-6H-indolo[2,1-a]indole-10b(11H)-carboxylate (**8**)

Purification by flash chromatography (petroleum ether/ethyl acetate v/v =10:1) yielding a white solid (64.6 mg, 93% yield). <sup>1</sup>H NMR (500 MHz, CDCl<sub>3</sub>) δ 7.88 (d, *J* = 7.6 Hz, 1H), 7.72 (d, *J* = 7.8 Hz, 1H), 7.65 (d, *J* = 7.6 Hz, 1H), 7.61 (td, *J* = 7.6 Hz, 1.1 Hz, 1H), 7.53 (td, *J* = 7.5 Hz, 1.1 Hz, 1H), 7.30 (t, *J* = 7.7 Hz, 1H), 7.22 (d, *J* = 7.5 Hz, 1H), 7.08 (td, *J* = 7.5 Hz, 0.8 Hz, 1H), 4.77-4.74 (m, 1H), 3.93 (d, *J* = 15.8 Hz, 1H), 3.33 (d, *J* = 15.8 Hz, 1H), 1.66-1.63 (m, 2H), 1.54-1.48 (m, 2H), 1.43-1.36 (m, 2H), 1.35-1.24 (m, 4H). <sup>13</sup>C NMR (125 MHz, CDCl<sub>3</sub>) δ 170.4, 168.2, 144.7, 140.1, 134.2, 133.4, 133.0, 129.6, 128.2, 125.1, 125.0, 124.7, 123.0, 116.7, 74.7, 37.9, 30.9, 25.2, 23.0. HRMS (ESI): *m/z* calcd for C<sub>22</sub>H<sub>21</sub>NO<sub>3</sub>+H<sup>+</sup>: 348.1594 [*M*+H<sup>+</sup>]; found: 348.1594.

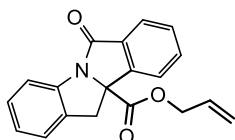

Allyl 6-oxo-6H-isoindolo[2,1-a]indole-10b(11H)-carboxylate (**9**)

Purification by flash chromatography (petroleum ether/ethyl acetate v/v =10:1) yielding colorless oil (52.0 mg, 85% yield). <sup>1</sup>H NMR (500 MHz, CDCl<sub>3</sub>) δ 7.88 (d, *J* = 7.5 Hz, 1H), 7.72 (d, *J* = 7.8 Hz, 1H), 7.65 (d, *J* = 7.5 Hz, 1H), 7.62 (td, *J* = 7.5 Hz, 1.2 Hz, 1H), 7.54 (td, *J* = 7.5 Hz, 1.2 Hz, 1H), 7.31 (t, *J* = 7.7 Hz, 1H), 7.22 (d, *J* = 7.5 Hz, 1H), 7.09 (td, *J* = 7.6 Hz, 0.9 Hz, 1H), 5.79-5.71 (m, 1H), 5.13-5.06 (m, 2H), 4.57 (dt, *J* = 5.5 Hz, 1.5 Hz, 1H), 3.98 (d, *J* = 15.8 Hz, 1H), 3.34 (d, *J* = 15.8 Hz, 1H). <sup>13</sup>C NMR (125 MHz, CDCl<sub>3</sub>) δ 171.0, 168.3, 144.4, 140.0, 134.1, 133.3, 133.2, 131.0, 129.8, 128.3, 125.2, 125.1, 124.9, 123.1, 118.4, 116.8, 76.8, 66.6, 38.0. HRMS (ESI): *m/z* calcd for C<sub>19</sub>H<sub>15</sub>NO<sub>3</sub>+H<sup>+</sup>: 306.1125 [*M*+H<sup>+</sup>]; found: 306.1130.

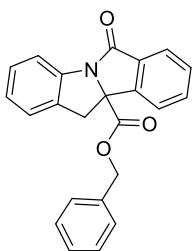

Benzyl 6-oxo-6H-isoindolo[2,1-a]indole-10b(11H)-carboxylate (**10**)

Purification by flash chromatography (petroleum ether/ethyl acetate v/v =10:1) yielding yellow oil (59.0 mg, 83% yield). <sup>1</sup>H NMR (400 MHz, CDCl<sub>3</sub>) δ 7.88 (d, *J* = 7.4 Hz, 1H), 7.73 (d, *J* = 7.8 Hz, 1H), 7.58 (d, *J* = 3.9 Hz, 2H), 7.55-7.52 (m, 1H), 7.32 (t, *J* = 7.7 Hz, 1H), 7.26-7.23 (m, 3H), 7.21 (d, *J* = 7.5 Hz, 1H), 7.11-7.06 (m, 3H), 5.11 (d, *J* = 3.2 Hz, 2H), 3.96 (d, *J* = 15.8 Hz, 1H), 3.34 (d, *J* = 15.8 Hz, 1H). <sup>13</sup>C NMR (100 MHz, CDCl<sub>3</sub>) δ 171.1, 168.2, 144.2, 140.0, 135.0, 134.1, 133.4, 133.1, 129.8, 128.5, 128.3, 128.3, 127.5, 125.2, 125.1, 124.9, 123.1, 116.8, 76.9, 67.8, 37.9. HRMS (ESI): *m/z* calcd for C<sub>23</sub>H<sub>17</sub>NO<sub>3</sub>+H<sup>+</sup>: 356.1281 [*M*+H<sup>+</sup>]; found: 356.1273.

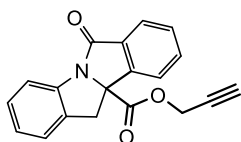

Prop-2-yn-1-yl 6-oxo-6H-isoindolo[2,1-a]indole-10b(11H)-carboxylate (**11**)

Purification by flash chromatography (petroleum ether/ethyl acetate v/v =10:1) yielding a white solid (34.6 mg, 57% yield). <sup>1</sup>H NMR (400 MHz, CDCl<sub>3</sub>) δ 7.89 (d, *J* = 7.5 Hz, 1H), 7.73 (d, *J* = 7.8 Hz, 1H), 7.67 (d, *J* = 7.4 Hz, 1H), 7.63 (td, *J* = 7.2 Hz, 1.0 Hz, 1H), 7.55 (td, *J* = 7.5 Hz, 1.3 Hz, 1H), 7.31 (t, *J* = 7.6 Hz, 1H), 7.23 (d, *J* = 7.5 Hz, 1H), 7.09 (td, *J* = 7.5 Hz, 0.6 Hz, 1H), 4.72-4.62 (m, 2H), 3.98 (d, *J* = 15.9 Hz, 1H), 3.35 (d, *J* = 15.9 Hz, 1H), 2.42 (t, *J*

= 2.4 Hz, 1H).  $^{13}\text{C}$  NMR (125 MHz,  $\text{CDCl}_3$ )  $\delta$  170.6, 168.3, 144.0, 140.0, 133.9, 133.3, 133.2, 130.0, 128.4, 125.2, 125.2, 124.9, 123.2, 116.9, 76.7, 76.5, 75.8, 53.8, 38.0. HRMS (ESI):  $m/z$  calcd for  $\text{C}_{19}\text{H}_{13}\text{NO}_3+\text{H}^+$ : 304.0968 [ $M+\text{H}^+$ ]; found: 304.0962.

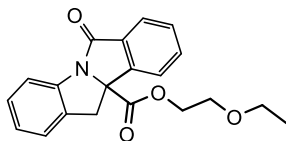

2-Ethoxyethyl 6-oxo-6H-isoindolo[2,1-a]indole-10b(11H)-carboxylate (**12**)

Purification by flash chromatography (petroleum ether/ethyl acetate v/v =10:1) yielding a white solid (60.0 mg, 89% yield).  $^1\text{H}$  NMR (400 MHz,  $\text{CDCl}_3$ )  $\delta$  7.88 (d,  $J$  = 7.5 Hz, 1H), 7.71 (t,  $J$  = 7.5 Hz, 2H), 7.62 (td,  $J$  = 7.5 Hz, 1.1 Hz, 1H), 7.54 (td,  $J$  = 7.5 Hz, 1.0 Hz, 1H), 7.31 (t,  $J$  = 7.6 Hz, 1H), 7.22 (d,  $J$  = 7.5 Hz, 1H), 7.09 (td,  $J$  = 7.5 Hz, 1.1 Hz, 1H), 4.29-4.20 (m, 2H), 3.98 (d,  $J$  = 15.8 Hz, 1H), 3.56-3.47 (m, 2H), 3.36-3.29 (m, 3H), 1.05 (t,  $J$  = 7.0 Hz, 3H).  $^{13}\text{C}$  NMR (125 MHz,  $\text{CDCl}_3$ )  $\delta$  171.1, 168.3, 144.4, 140.0, 134.2, 133.3, 133.1, 129.8, 128.3, 125.2, 125.0, 124.8, 123.3, 116.8, 76.9, 67.8, 66.6, 65.6, 38.1, 15.1. HRMS (ESI):  $m/z$  calcd for  $\text{C}_{20}\text{H}_{19}\text{NO}_4+\text{H}^+$ : 338.1387 [ $M+\text{H}^+$ ]; found: 338.1387.

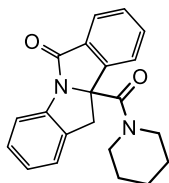

10b-(Piperidine-1-carbonyl)-10b,11-dihydro-6H-isoindolo[2,1-a]indol-6-one (**13**)

Purification by flash chromatography (petroleum ether/ethyl acetate v/v =10:1) yielding yellow oil (50.5 mg, 76% yield).  $^1\text{H}$  NMR (500 MHz,  $\text{CDCl}_3$ )  $\delta$  7.90 (d,  $J$  = 7.6 Hz, 1H), 7.67-7.62 (m, 3H), 7.54 (td,  $J$  = 7.0 Hz, 1.7 Hz, 1H), 7.29 (t,  $J$  = 7.7 Hz, 1H), 7.24 (d,  $J$  = 7.5 Hz, 1H), 7.11 (t,  $J$  = 7.5 Hz, 1H), 4.55 (d,  $J$  = 15.5 Hz, 1H), 3.44 (br, 2H), 3.34 (br, 2H), 3.03 (d,  $J$  = 15.5 Hz, 1H), 1.45-1.43 (quint,  $J$  = 0.8 Hz, 2H), 1.32-1.26 (m, 4H).  $^{13}\text{C}$  NMR (125 MHz,  $\text{CDCl}_3$ )  $\delta$  170.0, 167.2, 146.8, 139.9, 136.8, 133.7, 132.0, 129.5, 127.7, 125.4, 125.2, 125.1, 123.1, 117.5, 79.7, 46.6, 41.0, 26.0, 24.4. HRMS (ESI):  $m/z$  calcd for  $\text{C}_{21}\text{H}_{20}\text{N}_2\text{O}_2+\text{H}^+$ : 333.1598 [ $M+\text{H}^+$ ]; found: 333.1603.

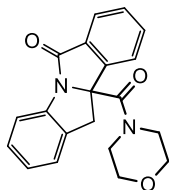

10b-(Morpholine-4-carbonyl)-10b,11-dihydro-6H-isoindolo[2,1-a]indol-6-one (**14**)

Purification by flash chromatography (petroleum ether/ethyl acetate v/v =10:1) yielding a white solid (60.2 mg, 90% yield).  $^1\text{H}$  NMR (500 MHz,  $\text{CDCl}_3$ )  $\delta$  7.90 (d,  $J$  = 7.6 Hz, 1H), 7.68 (d,  $J$  = 4.0, 2H), 7.63 (d,  $J$  = 7.8, 1H), 7.58-7.55 (m, 1H), 7.31 (t,  $J$  = 7.7 Hz, 1H), 7.25 (d,  $J$  = 7.7, 1H), 7.14 (t,  $J$  = 7.4, 1H), 4.50 (d,  $J$  = 15.5, 1H), 3.62-3.58 (m, 2H), 3.41 (m, 6H), 3.07 (d,  $J$  = 15.5, 1H).  $^{13}\text{C}$  NMR (125 MHz,  $\text{CDCl}_3$ )  $\delta$  169.9, 168.0, 146.4, 139.7, 136.6, 134.0, 131.8, 129.8, 127.9, 125.6, 125.3, 125.2, 123.2, 117.5, 79.5, 66.7, 45.9, 41.0. HRMS (ESI):  $m/z$  calcd for  $\text{C}_{20}\text{H}_{18}\text{N}_2\text{O}_3+\text{H}^+$ : 335.1390 [ $M+\text{H}^+$ ]; found: 335.1397.

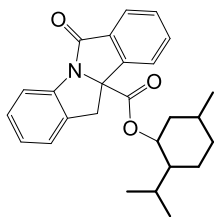

2-Isopropyl-5-methylcyclohexyl 6-oxo-6H-isoindolo[2,1-a]indole-10b(11H)-carboxylate (**15**)

Purification by flash chromatography (petroleum ether/ethyl acetate v/v =10:1) yielding a white solid (37.1mg, 46% yield).  $^1\text{H}$  NMR (400 MHz,  $\text{CDCl}_3$ )  $\delta$  7.88 (d,  $J$  = 7.5 Hz, 1H), 7.68 (dd,  $J$  = 7.5 Hz, 4.0 Hz, 1H), 7.61 (td,  $J$  = 7.4 Hz, 0.9 Hz, 1H), 7.54 (t,  $J$  = 7.4 Hz, 1H), 7.29 (t,  $J$  = 7.8 Hz, 1H), 7.21 (d,  $J$  = 7.4 Hz, 1H), 7.07 (t,  $J$  = 7.5 Hz, 1H), 4.57 (td,  $J$  = 10.9 Hz, 4.4 Hz, 1H), 3.88 (d,  $J$  = 15.6 Hz, 1H), 3.30 (d,  $J$  = 15.6 Hz, 1H), 1.77 (d,  $J$  = 12.2 Hz, 1H), 1.62-1.55 (m, 3H), 1.41-1.37 (m, 1H), 1.31-1.24 (m, 2H), 0.98-0.87 (m, 1H), 0.84-0.79 (m, 4H), 0.66 (d,  $J$  = 6.8 Hz, 3H), 0.45 (d,  $J$  = 6.9 Hz, 3H).  $^{13}\text{C}$  NMR (100 MHz,  $\text{CDCl}_3$ )  $\delta$  171.1, 167.8, 144.1, 140.0, 134.3, 133.5, 132.9, 129.6, 128.2, 125.1, 124.9, 124.7, 123.2, 116.7, 76.9, 46.8, 40.0, 38.7, 34.0, 31.3, 25.8, 23.2, 21.9, 20.5, 15.8. HRMS (ESI):  $m/z$  calcd for  $\text{C}_{26}\text{H}_{29}\text{NO}_3 + \text{H}^+$ : 404.2220 [ $M + \text{H}^+$ ]; found: 404.2223.

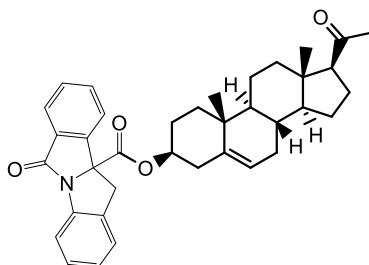

(3S,8S,9S,10R,13S,14S,17S)-17-Acetyl-10,13-dimethyl-2,3,4,7,8,9,10,11,12,13,14,15,16,17-tetradecahydro-1H-cyclopenta[a]phenanthren-3-yl 6-oxo-6H-isoindolo[2,1-a]indole-10b(11H)-carboxylate (**16**)

Purification by flash chromatography (petroleum ether/ethyl acetate v/v =10:1) yielding a white solid (99.2 mg, 88% yield).  $^1\text{H}$  NMR (500 MHz,  $\text{CDCl}_3$ )  $\delta$  7.88 (d,  $J$  = 7.5 Hz, 1H), 7.72 (d,  $J$  = 7.8 Hz, 1H), 7.65-7.60 (m, 2H), 7.53 (t,  $J$  = 7.5 Hz, 1H), 7.30 (t,  $J$  = 7.6 Hz, 1H), 7.21 (d,  $J$  = 7.5 Hz, 1H), 7.08 (t,  $J$  = 7.5 Hz, 1H), 5.30 (s, 1H), 7.60-7.56 (m, 1H), 3.94 (d,  $J$  = 15.8 Hz, 1H), 3.32 (d,  $J$  = 15.8 Hz, 1H), 2.51 (t,  $J$  = 8.7 Hz, 1H), 2.25-2.16 (m, 3H), 2.11 (s, 3H), 2.03-1.94 (m, 2H), 1.82-1.79 (m, 1H), 1.71-1.60 (m, 5H), 1.58-1.53 (m, 2H), 1.50-1.41 (m, 3H), 1.26-1.18 (m, 1H), 1.15-1.07 (m, 2H), 0.97 (s, 3H), 0.61 (s, 3H).  $^{13}\text{C}$  NMR (125 MHz,  $\text{CDCl}_3$ )  $\delta$  209.6, 170.5, 168.3, 144.6, 140.0, 139.1, 134.2, 133.4, 133.1, 129.7, 128.2, 125.1, 125.0, 124.8, 122.9, 122.7, 116.7, 76.9, 76.1, 63.6, 56.8, 49.8, 44.0, 38.7, 37.9, 37.6, 37.5, 36.8, 36.5, 31.7, 31.6, 27.3, 24.5, 22.8, 21.0, 19.3, 13.2. HRMS (ESI):  $m/z$  calcd for  $\text{C}_{37}\text{H}_{41}\text{NO}_4 + \text{H}^+$ : 564.3108 [ $M + \text{H}^+$ ]; found: 564.31049.

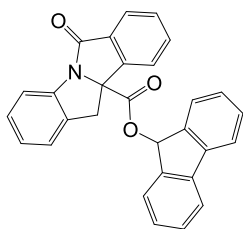

9H-Fluoren-9-yl 6-oxo-6H-isoindolo[2,1-a]indole-10b(11H)-carboxylate (**17**)

Purification by flash chromatography (petroleum ether/ethyl acetate v/v =10:1) yielding a yellow solid (43.8 mg, 51% yield).  $^1\text{H}$  NMR (500 MHz,  $\text{CDCl}_3$ )  $\delta$  7.87 (d,  $J$  = 7.4 Hz, 1H), 7.73 (d,  $J$  = 7.8 Hz, 1H), 7.64 (dd,  $J$  = 7.5 Hz,

3.0 Hz, 2H), 7.61-7.56 (m, 2H), 7.53 (td,  $J = 7.0$  Hz, 1.6 Hz, 1H), 7.40-7.37 (m, 2H), 7.33 (t,  $J = 7.7$  Hz, 1H), 7.25-7.15 (m, 5H), 7.11 (td,  $J = 7.5$  Hz, 0.7 Hz, 1H), 6.72 (s, 1H), 3.93 (d,  $J = 15.8$  Hz, 1H), 3.34 (d,  $J = 15.8$  Hz, 1H).  $^{13}\text{C}$  NMR (125 MHz,  $\text{CDCl}_3$ )  $\delta$  171.8, 168.1, 144.0, 141.2, 141.0, 141.0, 140.9, 140.0, 133.9, 133.4, 133.1, 129.9, 129.8, 129.7, 128.4, 128.0, 127.9, 125.6, 125.5, 125.2, 124.9, 123.3, 120.2, 116.9, 77.3, 76.9, 38.2. HRMS (ESI):  $m/z$  calcd for  $\text{C}_{29}\text{H}_{19}\text{NO}_3 + \text{H}^+$ : 430.1438 [ $M + \text{H}^+$ ]; found: 430.1442.

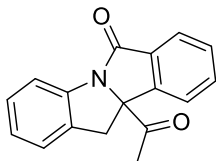

10b-Acetyl-10b,11-dihydro-6H-isoindolo[2,1-a]indol-6-one (**18**)

Purification by flash chromatography (petroleum ether/ethyl acetate v/v = 10:1) yielding a white solid (37.9 mg, 75% yield).  $^1\text{H}$  NMR (500 MHz,  $\text{CDCl}_3$ )  $\delta$  7.92 (d,  $J = 7.5$  Hz, 1H), 7.72 (d,  $J = 7.8$  Hz, 1H), 7.62 (td,  $J = 7.5$  Hz, 0.9 Hz, 1H), 7.56 (td,  $J = 7.5$  Hz, 0.7 Hz, 1H), 7.49 (d,  $J = 7.6$  Hz, 1H), 7.31 (t,  $J = 7.7$  Hz, 1H), 7.21 (d,  $J = 7.5$  Hz, 1H), 7.10 (t,  $J = 7.5$  Hz, 1H), 4.07 (d,  $J = 15.7$  Hz, 1H), 3.05 (d,  $J = 15.7$  Hz, 1H), 2.04 (s, 3H).  $^{13}\text{C}$  NMR (125 MHz,  $\text{CDCl}_3$ )  $\delta$  207.3, 169.4, 143.8, 139.5, 135.0, 133.6, 133.3, 129.9, 128.2, 125.4, 125.3, 125.2, 123.2, 116.8, 82.1, 36.0, 24.5. HRMS (ESI):  $m/z$  calcd for  $\text{C}_{17}\text{H}_{13}\text{NO}_2 + \text{H}^+$ : 264.1019 [ $M + \text{H}^+$ ]; found: 264.1015.

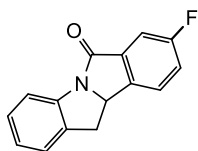

8-Fluoro-10b,11-dihydro-6H-isoindolo[2,1-a]indol-6-one (**20**)

Purification by flash chromatography (petroleum ether/ethyl acetate v/v = 10:1) yielding a yellow solid (47.4 mg, 99% yield).  $^1\text{H}$  NMR (400 MHz,  $\text{CDCl}_3$ )  $\delta$  7.66 (d,  $J = 7.8$  Hz, 1H), 7.55 (dd,  $J = 7.6$  Hz, 2.3 Hz, 1H), 7.49 (dd,  $J = 8.2$  Hz, 4.4 Hz, 1H), 7.33-7.25 (m, 3H), 7.09 (t,  $J = 7.5$  Hz, 1H), 5.59 (t,  $J = 9.4$  Hz, 1H), 3.45 (dd,  $J = 15.1$  Hz, 8.6 Hz, 1H), 3.03 (dd,  $J = 15.1$  Hz, 10.3 Hz, 1H).  $^{13}\text{C}$  NMR (100 MHz,  $\text{CDCl}_3$ )  $\delta$  141.41, 140.38, 136.50, 136.41, 135.90, 128.12, 125.46, 124.75, 124.41, 124.32, 120.16, 119.93, 116.52, 111.66, 111.43, 65.11, 33.85.  $^{19}\text{F}$  NMR (300 MHz,  $\text{CDCl}_3$ )  $\delta$  -112.07. HRMS (ESI):  $m/z$  calcd for  $\text{C}_{15}\text{H}_{10}\text{FNO} + \text{H}^+$ : 240.0819 [ $M + \text{H}^+$ ]; found: 240.0824.

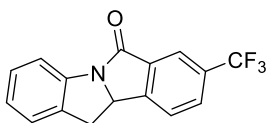

8-(Trifluoromethyl)-10b,11-dihydro-6H-isoindolo[2,1-a]indol-6-one (**21**)<sup>S12</sup>

Purification by flash chromatography (petroleum ether/ethyl acetate v/v = 20:1) yielding a yellow solid (23.7 mg, 41% yield).  $^1\text{H}$  NMR (400 MHz,  $\text{CDCl}_3$ )  $\delta$  8.16 (s, 1H), 7.87 (d,  $J = 7.8$  Hz, 1H), 7.69 (d,  $J = 8.2$  Hz, 1H), 7.66 (d,  $J = 8.3$  Hz, 1H), 7.31 (t,  $J = 7.7$  Hz, 1H), 7.26 (d,  $J = 6.8$  Hz, 1H), 7.11 (t,  $J = 7.5$  Hz, 1H), 5.67 (t,  $J = 9.5$  Hz, 1H), 3.51 (dd,  $J = 15.1$  Hz, 8.7 Hz, 1H), 3.08 (dd,  $J = 15.0$  Hz, 10.4 Hz, 1H).  $^{19}\text{F}$  NMR (300 MHz,  $\text{CDCl}_3$ )  $\delta$  -62.4. HRMS (ESI):  $m/z$  calcd for  $\text{C}_{16}\text{H}_{10}\text{F}_3\text{NO} + \text{H}^+$ : 290.0787 [ $M + \text{H}^+$ ]; found: 290.0797.

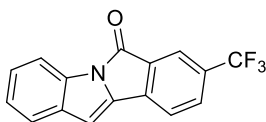

8-(Trifluoromethyl)-6H-isoindolo[2,1-a]indol-6-one (**21A**).

Purification by flash chromatography (petroleum ether/ethyl acetate v/v =20:1) yielding a yellow solid (18.4 mg, 32% yield). <sup>1</sup>H NMR (400 MHz, CDCl<sub>3</sub>) δ 7.98 (s, 1H), 7.88 (d, *J* = 7.9 Hz, 1H), 7.75 (d, *J* = 7.9 Hz, 1H), 7.60 (d, *J* = 7.9 Hz, 1H), 7.47 (d, *J* = 7.8 Hz, 1H), 7.31 (td, *J* = 7.7 Hz, 0.9 Hz, 1H), 7.18 (td, *J* = 7.6 Hz, 0.8 Hz, 1H), 6.71 (s, 1H). <sup>13</sup>C NMR (125 MHz, CDCl<sub>3</sub>) δ 161.1, 137.5, 137.3, 134.3, 134.2, 133.8, 131.0 (q, *J* = 33.0 Hz), 130.7 (q, *J* = 3.6 Hz), 127.2, 124.4, 123.5 (q, *J* = 270.6 Hz), 122.8, 122.4 (q, *J* = 3.7 Hz), 121.4, 113.6, 105.6. <sup>19</sup>F NMR (300 MHz, CDCl<sub>3</sub>) δ -62.7. HRMS (ESI): *m/z* calcd for C<sub>16</sub>H<sub>8</sub>F<sub>3</sub>NO+H<sup>+</sup> 288.0631 [*M*+H<sup>+</sup>]; found: 288.0638.

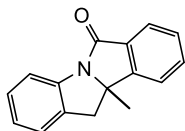

10b-Methyl-10b,11-dihydro-6H-isoindolo[2,1-a]indol-6-one (**22**)<sup>S9</sup>

Purification by flash chromatography (petroleum ether/ethyl acetate v/v =20:1) yielding a yellow solid (25.4 mg, 54% yield). <sup>1</sup>H NMR (500 MHz, CDCl<sub>3</sub>) δ 7.87-7.86 (m, 1H), 7.68 (d, *J* = 7.8 Hz, 1H), 7.60 (td, *J* = 7.5 Hz, 1.1 Hz, 1H), 7.49-7.46 (m, 2H), 7.45 (t, *J* = 7.7 Hz, 1H), 7.23 (d, *J* = 7.5 Hz, 1H), 7.08 (td, *J* = 7.5 Hz, 0.9 Hz, 1H), 3.10 (d, *J* = 15.1 Hz, 1H), 3.18 (d, *J* = 15.1 Hz, 1H), 1.64 (s, 3H). <sup>13</sup>C NMR (125 MHz, CDCl<sub>3</sub>) δ 168.2, 151.3, 139.5, 135.8, 132.8, 132.7, 128.6, 128.0, 125.7, 125.0, 124.5, 121.9, 117.3, 71.9, 40.4, 27.2.

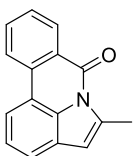

5-Methyl-7H-pyrrolo[3,2,1-de]phenanthridin-7-one (**22A**)

Purification by flash chromatography (petroleum ether/ethyl acetate v/v =20:1) yielding a yellow solid (17.6 mg, 38% yield). <sup>1</sup>H NMR (400 MHz, CDCl<sub>3</sub>) δ 8.53 (d, *J* = 8.0 Hz, 1H), 8.19 (d, *J* = 8.0 Hz, 1H), 7.89 (d, *J* = 7.7 Hz, 1H), 7.74 (t, *J* = 7.8 Hz, 1H), 7.58-7.54 (m, 2H), 7.39 (td, *J* = 7.7 Hz, 0.6 Hz, 1H), 6.51 (s, 1H), 2.88 (s, 3H). <sup>13</sup>C NMR (100 MHz, CDCl<sub>3</sub>) δ 160.5, 139.2, 132.9, 132.2, 129.3, 127.9, 127.6, 123.8, 122.3, 121.1, 117.1, 116.2, 109.5, 16.0. HRMS (ESI): *m/z* calcd for C<sub>16</sub>H<sub>11</sub>NO+H<sup>+</sup> 234.0913 [*M*+H<sup>+</sup>]; found: 234.0920.

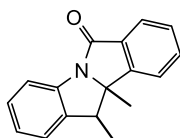

10b, 11-Dimethyl-10b,11-dihydro-6H-isoindolo[2,1-a]indol-6-one (**23**)

Purification by flash chromatography (petroleum ether/ethyl acetate v/v =20:1) yielding yellow oil (21.9 mg, 44% yield). <sup>1</sup>H NMR (500 MHz, CDCl<sub>3</sub>) δ 7.90-7.88 (m, 1H), 7.63-7.57 (m, 2H), 7.49 (t, *J* = 9.4 Hz, 2H), 7.32-7.27 (m, 1H), 7.16-7.10 (m, 2H), 3.31 (q, *J* = 8.9 Hz, 1H), 1.56 (d, *J* = 8.9 Hz, 3H), 1.49 (s, 3H). <sup>13</sup>C NMR (125 MHz, CDCl<sub>3</sub>) δ 167.4, 151.1, 141.1, 138.9, 132.6, 128.7, 128.0, 125.1, 124.7, 123.6, 121.5, 117.2, 75.4, 44.3, 20.8, 11.6. HRMS (ESI): *m/z* calcd for C<sub>17</sub>H<sub>15</sub>NO+H<sup>+</sup> 250.1226 [*M*+H<sup>+</sup>]; found: 250.1234.

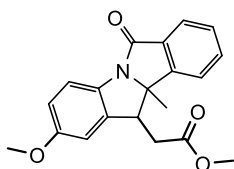

Methyl 2-(2-methoxy-10b-methyl-6-oxo-10b,11-dihydro-6H-isoindolo[2,1-a]indol-11-yl)acetate (**24**)

Purification by flash chromatography (petroleum ether/ethyl acetate v/v =20:1) yielding a white solid (19.5 mg, 0.15 mmol, 29% yield). <sup>1</sup>H NMR (400 MHz, CDCl<sub>3</sub>) δ 8.86 (d, *J* = 7.6 Hz, 1H), 7.59-7.53 (m, 2H), 7.48 (t, *J* = 7.2 Hz, 1H), 7.39 (d, *J* = 7.6 Hz, 1H), 6.82 (dd, *J* = 8.4 Hz, 2.2 Hz, 1H), 6.69 (s, 1H), 3.79-3.78 (m, 6H), 3.75-3.70 (m, 1H), 3.00-2.87 (m, 2H), 1.52 (s, 3H). <sup>13</sup>C NMR (100 MHz, CDCl<sub>3</sub>) δ 172.4, 167.3, 157.4, 150.0, 140.2, 132.7, 132.5, 132.2, 128.9, 124.9, 122.1, 117.9, 112.2, 111.3, 75.2, 55.7, 52.2, 46.4, 33.0, 21.3. HRMS (ESI): *m/z* calcd for C<sub>20</sub>H<sub>19</sub>NO<sub>4</sub>+H<sup>+</sup> 338.1387 [*M*+H<sup>+</sup>]; found: 338.1388.

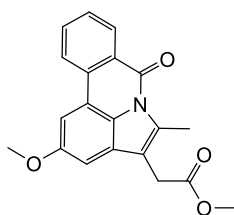

Methyl 2-(2-methoxy-5-methyl-7-oxo-7H-pyrrolo[3,2,1-de]phenanthridin-4-yl)acetate (**24A**)

Purification by flash chromatography (petroleum ether/ethyl acetate v/v =20:1) yielding a yellow solid (20.8 mg, 31% yield). <sup>1</sup>H NMR (400 MHz, CDCl<sub>3</sub>) δ 8.53 (d, *J* = 8.0 Hz, 1H), 8.13 (d, *J* = 7.6 Hz, 1H), 7.75 (t, *J* = 7.6 Hz, 1H), 7.58 (t, *J* = 7.6 Hz, 1H), 7.47 (s, 1H), 7.15 (s, 1H), 3.95 (s, 3H), 3.72 (s, 5H), 2.84 (s, 3H). <sup>13</sup>C NMR (125 MHz, CDCl<sub>3</sub>) δ 171.2, 160.0, 157.4, 137.0, 133.9, 132.8, 129.5, 128.6, 128.1, 128.0, 126.4, 122.4, 116.5, 113.8, 105.0, 104.4, 56.2, 52.3, 30.0, 13.3. HRMS (ESI): *m/z* calcd for C<sub>20</sub>H<sub>17</sub>NO<sub>4</sub>+H<sup>+</sup> 336.1230 [*M*+H<sup>+</sup>]; found: 336.1232.

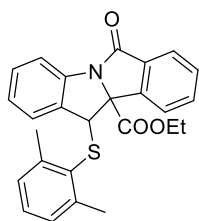

Ethyl 11-((2,6-dimethylphenyl)thio)-6-oxo-6H-isoindolo[2,1-a]indole-10b(11H)-carboxylate (**25A**)

Purification by flash chromatography (petroleum ether/ethyl acetate v/v =20:1) yielding a white solid (29.2 mg, 34% yield). <sup>1</sup>H NMR (500 MHz, CDCl<sub>3</sub>) δ 7.94 (d, *J* = 6.7 Hz, 1H), 7.75 (d, *J* = 7.7 Hz, 1H), 7.60-7.58 (m, 3H), 7.33 (t, *J* = 7.3 Hz, 1H), 7.13 (t, *J* = 7.3 Hz, 1H), 7.00 (d, *J* = 7.2 Hz, 2H), 6.81 (t, *J* = 7.4 Hz, 1H), 6.18 (d, *J* = 7.2 Hz, 1H), 5.22 (s, 1H), 4.12 (q, *J* = 6.7 Hz, 2H), 2.11 (s, 6H), 1.13 (t, *J* = 6.7 Hz, 3H). <sup>13</sup>C NMR (125 MHz, CDCl<sub>3</sub>) δ 170.1, 167.6, 144.2, 140.2, 138.9, 134.7, 134.5, 132.4, 130.2, 129.4, 129.0, 128.1, 125.2, 124.7, 124.6, 124.0, 116.7, 80.4, 62.8, 50.8, 21.6, 13.8. HRMS (ESI): *m/z* calcd for C<sub>26</sub>H<sub>23</sub>NO<sub>3</sub>S+H<sup>+</sup> 430.1471 [*M*+H<sup>+</sup>]; found: 430.1475.

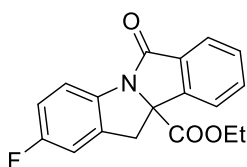

Ethyl 2-fluoro-6-oxo-6H-isoindolo[2,1-a]indole-10b(11H)-carboxylate (**26**)

Purification by flash chromatography (petroleum ether/ethyl acetate v/v =10:1) yielding yellow oil (61.6 mg, 99% yield). <sup>1</sup>H NMR (400 MHz, CDCl<sub>3</sub>) δ 7.81 (d, *J* = 7.6 Hz, 1H), 7.59-7.53 (m, 3H), 7.81 (ddd, *J* = 7.6 Hz, 6.0 Hz, 2.5 Hz, 1H), 6.93 (td, *J* = 8.8 Hz, 2.5 Hz, 1H), 6.88 (d, *J* = 8.1 Hz, 1H), 4.08 (q, *J* = 7.1 Hz, 2H), 3.88 (d, *J* = 16.0 Hz, 1H), 3.24 (d, *J* = 16.0 Hz, 1H), 1.09 (t, *J* = 7.1 Hz, 3H). <sup>13</sup>C NMR (100 MHz, CDCl<sub>3</sub>) δ 171.0, 168.4, 160.3 (d, *J* = 241.6 Hz), 144.4, 136.2, 136.1, 133.3, 133.0, 129.9, 125.1, 123.0, 117.5 (d, *J* = 8.7 Hz), 114.7 (d, *J* = 23.4 Hz), 112.8 (d, *J* = 24.6 Hz), 77.2, 62.7, 38.1 (d, *J* = 1.5 Hz), 13.9. <sup>19</sup>F NMR (300 MHz, CDCl<sub>3</sub>) δ -117.8. HRMS (ESI): *m/z* calcd for C<sub>18</sub>H<sub>14</sub>FNO<sub>3</sub>+H<sup>+</sup>: 312.1030 [*M*+H<sup>+</sup>]; found: 312.1030.

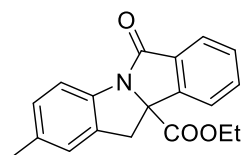

Ethyl 2-methyl-6-oxo-6H-isoindolo[2,1-a]indole-10b(11H)-carboxylate (**27**)

Purification by flash chromatography (petroleum ether/ethyl acetate v/v =10:1) yielding a white solid (52.8 mg, 86% yield). <sup>1</sup>H NMR (500 MHz, CDCl<sub>3</sub>) δ 7.86 (d, *J* = 7.6 Hz, 1H), 7.64-7.58 (m, 3H), 7.52 (td, *J* = 7.3 Hz, 1.1 Hz, 1H), 7.10 (d, *J* = 7.9 Hz, 1H), 7.03 (s, 1H), 4.12 (q, *J* = 7.1 Hz, 2H), 3.92 (d, *J* = 15.8 Hz, 1H), 3.28 (d, *J* = 15.8 Hz, 1H), 2.31 (s, 3H), 1.14 (t, *J* = 7.1 Hz, 3H). <sup>13</sup>C NMR (125 MHz, CDCl<sub>3</sub>) δ 171.4, 168.3, 144.5, 137.6, 134.6, 134.3, 133.4, 133.0, 129.7, 128.6, 125.9, 125.0, 122.9, 116.4, 77.0, 62.5, 38.0, 21.1, 13.9. HRMS (ESI): *m/z* calcd for C<sub>19</sub>H<sub>17</sub>NO<sub>3</sub>+H<sup>+</sup>: 308.1281 [*M*+H<sup>+</sup>]; found: 308.1291.

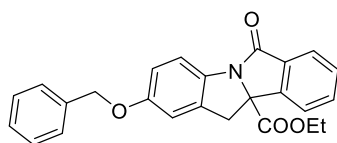

Ethyl 2-(benzyloxy)-6-oxo-6H-isoindolo[2,1-a]indole-10b(11H)-carboxylate (**28**)

Purification by flash chromatography (petroleum ether/ethyl acetate v/v =10:1) yielding yellow oil (69.5 mg, 87% yield). <sup>1</sup>H NMR (500 MHz, CDCl<sub>3</sub>) δ 7.87 (d, *J* = 7.6 Hz, 1H), 7.63-7.58 (m, 3H), 7.53 (td, *J* = 7.6 Hz, 1.4 Hz, 1H), 7.42-7.37 (m, 4H), 7.32 (t, *J* = 7.1 Hz, 1H), 6.91-6.87 (m, 2H), 5.03 (s, 2H), 4.13 (q, *J* = 7.2 Hz, 2H), 3.92 (d, *J* = 15.8 Hz, 1H), 3.29 (d, *J* = 15.8 Hz, 1H), 1.15 (t, *J* = 7.1 Hz, 3H). <sup>13</sup>C NMR (125 MHz, CDCl<sub>3</sub>) δ 171.3, 168.4, 156.5, 144.5, 136.9, 135.8, 133.8, 133.4, 133.0, 129.7, 128.6, 128.0, 127.4, 125.0, 122.9, 117.2, 113.8, 112.8, 77.2, 70.6, 62.6, 38.2, 13.9. HRMS (ESI): *m/z* calcd for C<sub>25</sub>H<sub>21</sub>NO<sub>4</sub>+H<sup>+</sup>: 400.1543 [*M*+H<sup>+</sup>]; found: 400.1541.

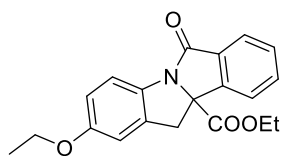

Ethyl 2-ethoxy-6-oxo-6H-isoindolo[2,1-a]indole-10b(11H)-carboxylate (**29**)

Purification by flash chromatography (petroleum ether/ethyl acetate v/v =10:1) yielding yellow oil (58.7 mg, 87% yield). <sup>1</sup>H NMR (500 MHz, CDCl<sub>3</sub>) δ 7.85 (d, *J* = 7.6 Hz, 1H), 7.62-7.57 (m, 3H), 7.51 (t, *J* = 7.5 Hz, 1H), 6.81-6.78 (m, 2H), 4.12 (q, *J* = 7.1 Hz, 2H), 3.98 (q, *J* = 7.1 Hz, 2H), 3.90 (d, *J* = 15.8 Hz, 1H), 3.27 (d, *J* = 15.8 Hz, 1H), 1.38 (t, *J* = 7.1 Hz, 3H), 1.14 (t, *J* = 7.1 Hz, 3H). <sup>13</sup>C NMR (100 MHz, CDCl<sub>3</sub>) δ 171.3, 168.3, 156.7, 144.4, 135.8, 133.4, 133.4, 132.9, 129.7, 124.9, 122.9, 117.2, 113.4, 112.4, 77.2, 64.0, 62.5, 38.2, 14.9, 13.9. HRMS (ESI): *m/z* calcd for C<sub>20</sub>H<sub>19</sub>NO<sub>4</sub>+H<sup>+</sup>: 338.1387 [*M*+H<sup>+</sup>]; found: 338.1386.

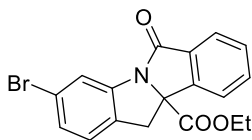

Ethyl 3-bromo-6-oxo-6H-isoindolo[2,1-a]indole-10b(11H)-carboxylate (**30**)

Purification by flash chromatography (petroleum ether/ethyl acetate v/v = 10:1) yielding a white solid (70.7 mg, 95% yield). <sup>1</sup>H NMR (400 MHz, CDCl<sub>3</sub>) δ 7.69-7.86 (m, 2H), 7.65-7.63 (m, 2H), 7.57-7.53 (m, 1H), 7.20 (dd, *J* = 8.0 Hz, 1.7 Hz, 1H), 7.07 (d, *J* = 8.0 Hz, 1H), 4.13 (q, *J* = 7.1 Hz, 2H), 3.91 (d, *J* = 16.0 Hz, 1H), 3.24 (d, *J* = 16.0 Hz, 1H), 1.16 (t, *J* = 7.1 Hz, 3H). <sup>13</sup>C NMR (100 MHz, CDCl<sub>3</sub>) δ 170.9, 168.2, 144.4, 141.2, 133.4, 133.2, 132.8, 129.9, 127.7, 126.3, 125.2, 123.1, 121.6, 120.0, 77.0, 62.8, 37.6, 13.9. HRMS (ESI): *m/z* calcd for C<sub>18</sub>H<sub>14</sub>BrNO<sub>3</sub>+H<sup>+</sup>: 372.0230 [*M*+H<sup>+</sup>]; found: 372.0221.

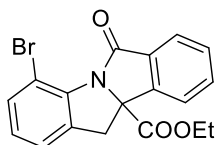

Ethyl 4-bromo-6-oxo-6H-isoindolo[2,1-a]indole-10b(11H)-carboxylate (**31**)

Purification by flash chromatography (petroleum ether/ethyl acetate v/v = 10:1) yielding a white solid (35.0 mg, 0.15 mmol, 47% yield). <sup>1</sup>H NMR (500 MHz, CDCl<sub>3</sub>) δ 7.81 (d, *J* = 7.5 Hz, 1H), 7.60-7.55 (m, 2H), 7.49 (t, *J* = 7.4 Hz, 1H), 7.40 (d, *J* = 8.1 Hz, 1H), 7.08 (d, *J* = 7.3 Hz, 1H), 6.92 (t, *J* = 7.7 Hz, 1H), 4.09-4.04 (m, 2H), 3.81 (d, *J* = 15.7 Hz, 1H), 3.22 (d, *J* = 15.7 Hz, 1H), 1.10 (t, *J* = 7.1 Hz, 3H). <sup>13</sup>C NMR (100 MHz, CDCl<sub>3</sub>) δ 170.7, 168.0, 143.7, 140.5, 138.2, 133.3, 132.7, 132.7, 129.9, 126.9, 125.3, 123.9, 122.9, 112.2, 77.8, 62.6, 39.5, 13.9. HRMS (ESI): *m/z* calcd for C<sub>18</sub>H<sub>14</sub>BrNO<sub>3</sub>+H<sup>+</sup>: 372.0230 [*M*+H<sup>+</sup>]; found: 372.0233.

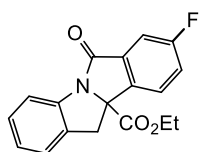

Ethyl 8-fluoro-6-oxo-6H-isoindolo[2,1-a]indole-10b(11H)-carboxylate (**32**)

Purification by flash chromatography (petroleum ether/ethyl acetate v/v = 10:1) yielding colorless oil (61.6 mg, 99% yield). <sup>1</sup>H NMR (400 MHz, CDCl<sub>3</sub>) δ 7.70 (d, *J* = 7.8 Hz, 1H), 7.63 (dd, *J* = 8.4 Hz, 4.4 Hz, 1H), 7.54 (dd, *J* = 7.4 Hz, 2.4 Hz, 1H), 7.31 (td, *J* = 8.4 Hz, 2.2 Hz, 2H), 7.22 (d, *J* = 7.4 Hz, 1H), 7.10 (td, *J* = 7.5 Hz, 0.8 Hz, 1H), 4.15 (q, *J* = 7.1 Hz, 2H), 3.94 (d, *J* = 15.8 Hz, 1H), 3.31 (d, *J* = 15.8 Hz, 1H), 1.16 (t, *J* = 7.1 Hz, 3H). <sup>13</sup>C NMR (125 MHz, CDCl<sub>3</sub>) δ 170.96, 166.92, 163.74 (d, *J* = 248.8 Hz), 140.02 (d, *J* = 2.4 Hz), 139.76, 135.70 (d, *J* = 8.4 Hz), 134.10, 128.33, 125.15 (d, *J* = 23.8 Hz), 124.74, 124.67, 120.53 (d, *J* = 23.8 Hz), 116.73, 111.79 (d, *J* = 23.8 Hz), 76.44, 62.69, 38.03, 13.89. <sup>19</sup>F NMR (375 MHz, CDCl<sub>3</sub>) δ 110.38. HRMS (ESI): *m/z* calcd for C<sub>18</sub>H<sub>14</sub>FNO<sub>3</sub>+H<sup>+</sup>: 312.1030 [*M*+H<sup>+</sup>]; found: 312.1035.

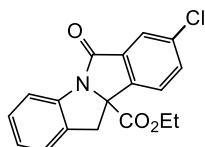

Ethyl 8-chloro-6-oxo-6H-isoindolo[2,1-a]indole-10b(11H)-carboxylate (**33**)

Purification by flash chromatography (petroleum ether/ethyl acetate v/v = 10:1) yielding colorless oil (60.9 mg, 93% yield). <sup>1</sup>H NMR (400 MHz, CDCl<sub>3</sub>) δ 7.84-7.83 (m, 1H), 7.70 (d, *J* = 7.8 Hz, 1H), 7.61-7.56 (m, 2H), 7.30 (t, *J* = 7.6 Hz, 1H), 7.22 (d, *J* = 7.4 Hz, 1H), 7.09 (td, *J* = 7.5 Hz, 0.4 Hz, 1H), 4.14 (q, *J* = 7.1 Hz, 2H), 3.94 (d, *J* = 15.8 Hz, 1H), 3.30 (d, *J* = 15.8 Hz, 1H), 1.16 (t, *J* = 7.1 Hz, 3H). <sup>13</sup>C NMR (100 MHz, CDCl<sub>3</sub>) δ 170.8, 166.7, 142.6, 136.2, 139.7, 135.2, 134.0, 133.2, 128.3, 125.3, 125.1, 125.0, 124.3, 116.7, 76.5, 62.8, 38.0, 13.9. HRMS (ESI): *m/z* calcd for

$C_{18}H_{14}ClNO_3 + H^+$ : 328.0735 [ $M+H^+$ ]; found: 328.0742.

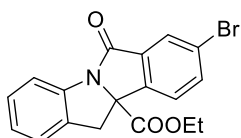

Ethyl 8-bromo-6-oxo-6H-isoindolo[2,1-a]indole-10b(11H)-carboxylate (**34**)

Purification by flash chromatography (petroleum ether/ethyl acetate v/v =10:1) yielding yellow oil (72.2 mg, 97% yield).  $^1H$  NMR (500 MHz,  $CDCl_3$ )  $\delta$  8.0 (d,  $J$  = 1.7 Hz, 1H), 7.73 (dd,  $J$  = 8.1 Hz, 1.8 Hz, 1H), 7.53 (d,  $J$  = 8.1 Hz, 1H), 7.31 (t,  $J$  = 7.6 Hz, 1H), 7.22 (d,  $J$  = 7.5 Hz, 1H), 7.10 (td,  $J$  = 7.5 Hz, 0.7 Hz, 1H), 4.14 (q,  $J$  = 7.2 Hz, 2H), 3.94 (d,  $J$  = 15.8 Hz, 1H), 3.31 (d,  $J$  = 15.8 Hz, 1H), 1.16 (t,  $J$  = 7.2 Hz, 3H).  $^{13}C$  NMR (100 MHz,  $CDCl_3$ )  $\delta$  169.7, 165.6, 142.1, 138.6, 135.0, 134.3, 133.0, 127.3, 127.1, 124.2, 124.1, 123.5, 123.0, 114.7, 75.6, 61.8, 36.9, 12.9. HRMS (ESI):  $m/z$  calcd for  $C_{18}H_{14}BrNO_3 + H^+$ : 372.0230 [ $M+H^+$ ]; found: 372.0222.

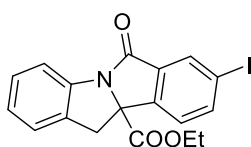

Ethyl 8-iodo-6-oxo-6H-isoindolo[2,1-a]indole-10b(11H)-carboxylate (**35**)

Purification by flash chromatography (petroleum ether/ethyl acetate v/v =20:1) yielding a white solid (29.3 mg, 35% yield).  $^1H$  NMR (400 MHz,  $CDCl_3$ )  $\delta$  8.14 (m, 1H), 7.86 (dd,  $J$  = 8.0 Hz, 1.0 Hz, 1H), 7.62 (d,  $J$  = 7.7 Hz, 1H), 7.33 (d,  $J$  = 8.0 Hz, 1H), 7.24 (t,  $J$  = 7.5 Hz, 1H), 7.14 (d,  $J$  = 7.5 Hz, 1H), 7.03 (t,  $J$  = 7.5 Hz, 1H), 4.06 (q,  $J$  = 7.1 Hz, 2H), 3.86 (d,  $J$  = 15.7 Hz, 1H), 3.23 (d,  $J$  = 15.7 Hz, 1H), 1.09 (t,  $J$  = 7.1 Hz, 3H).  $^{13}C$  NMR (100 MHz,  $CDCl_3$ )  $\delta$  170.7, 166.5, 143.8, 141.8, 139.6, 135.3, 134.1, 134.0, 128.4, 125.3, 125.1, 124.8, 116.8, 95.2, 76.7, 62.8, 37.9, 13.9. HRMS (ESI):  $m/z$  calcd for  $C_{18}H_{14}INO_3 + H^+$ : 420.0091 [ $M+H^+$ ]; found: 420.0092.

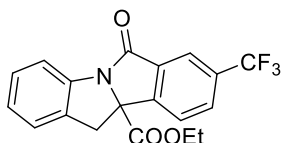

Ethyl 6-oxo-8-(trifluoromethyl)-6H-isoindolo[2,1-a]indole-10b(11H)-carboxylate (**36**)

Purification by flash chromatography (petroleum ether/ethyl acetate v/v =10:1) yielding a white solid (52.0 mg, 72% yield).  $^1H$  NMR (400 MHz,  $CDCl_3$ )  $\delta$  8.15 (s, 1H), 7.89 (d,  $J$  = 8.0 Hz, 1H), 7.80 (d,  $J$  = 8.0 Hz, 1H), 7.73 (d,  $J$  = 7.8 Hz, 1H), 7.33 (t,  $J$  = 7.6 Hz, 1H), 7.24 (d,  $J$  = 7.5 Hz, 1H), 7.13 (t,  $J$  = 7.0 Hz, 1H), 4.16 (q,  $J$  = 7.1 Hz, 2H), 3.98 (d,  $J$  = 15.8 Hz, 1H), 3.35 (d,  $J$  = 15.8 Hz, 1H), 1.17 (t,  $J$  = 7.1 Hz, 3H).  $^{13}C$  NMR (125 MHz,  $CDCl_3$ )  $\delta$  170.48, 166.60, 147.57, 139.59, 134.33, 133.80, 132.55 (q,  $J$  = 33.5 Hz, 1H), 129.97 (q,  $J$  = 3.5 Hz), 128.48, 125.29, 125.25, 123.83, 123.49 (q,  $J$  = 271.0 Hz), 122.29 (q,  $J$  = 3.8 Hz), 116.84, 76.84, 62.98, 37.95, 13.88.  $^{19}F$  NMR (300 MHz,  $CDCl_3$ )  $\delta$  -62.5. HRMS (ESI):  $m/z$  calcd for  $C_{19}H_{14}F_3NO_3 + H^+$ : 362.0999 [ $M+H^+$ ]; found: 290.0797.

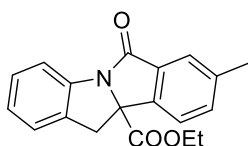

Ethyl 8-methyl-6-oxo-6H-isoindolo[2,1-a]indole-10b(11H)-carboxylate (**37**)

Purification by flash chromatography (petroleum ether/ethyl acetate v/v =10:1) yielding a white solid (60.8 mg, 99% yield).  $^1H$  NMR (400 MHz,  $CDCl_3$ )  $\delta$  7.72-7.68 (m, 2H), 7.52 (d,  $J$  = 7.8 Hz, 1H), 7.42 (d,  $J$  = 7.8 Hz, 1H), 7.30

(t,  $J = 7.7$  Hz, 1H), 7.21 (d,  $J = 7.4$  Hz, 1H), 7.07 (t,  $J = 7.4$  Hz, 1H), 4.12 (q,  $J = 7.1$  Hz, 2H), 3.94 (d,  $J = 15.8$  Hz, 1H), 3.28 (d,  $J = 15.8$  Hz, 1H), 2.45 (s, 3H), 1.15 (t,  $J = 7.1$  Hz, 3H).  $^{13}\text{C}$  NMR (125 MHz,  $\text{CDCl}_3$ )  $\delta$  171.4, 168.5, 141.9, 140.1, 140.0, 134.3, 134.1, 133.4, 128.2, 125.2, 125.1, 124.7, 122.7, 116.7, 76.6, 62.5, 38.0, 21.4, 13.9. HRMS (ESI):  $m/z$  calcd for  $\text{C}_{19}\text{H}_{17}\text{NO}_3 + \text{H}^+$ : 308.1281 [ $M + \text{H}^+$ ]; found: 308.1278.

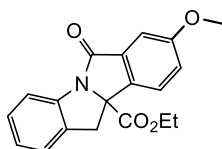

**Ethyl 8-methoxy-6-oxo-6H-isindolo[2,1-a]indole-10b(11H)-carboxylate (38)**

Purification by flash chromatography (petroleum ether/ethyl acetate v/v = 10:1) yielding colorless oil (50.4 mg, 78% yield).  $^1\text{H}$  NMR (500 MHz,  $\text{CDCl}_3$ )  $\delta$  7.71 (d,  $J = 7.8$  Hz, 1H), 7.53 (d,  $J = 8.4$  Hz, 1H), 7.34 (d,  $J = 2.5$  Hz, 1H), 7.30 (t,  $J = 7.7$  Hz, 1H), 7.21 (d,  $J = 7.5$  Hz, 1H), 7.15 (dd,  $J = 8.4$  Hz, 2.5 Hz, 1H), 7.08 (td,  $J = 7.5$  Hz, 1.0 Hz, 1H), 4.12 (q,  $J = 7.1$  Hz, 2H), 3.92 (d,  $J = 15.7$  Hz, 1H), 3.87 (s, 3H), 3.28 (d,  $J = 15.7$  Hz, 1H), 1.16 (t,  $J = 7.1$  Hz, 3H).  $^{13}\text{C}$  NMR (100 MHz,  $\text{CDCl}_3$ )  $\delta$  171.4, 168.2, 161.2, 140.0, 136.8, 134.9, 134.4, 128.2, 125.2, 124.8, 123.9, 121.1, 116.7, 107.7, 76.4, 62.5, 55.8, 38.0, 13.9. HRMS (ESI):  $m/z$  calcd for  $\text{C}_{19}\text{H}_{17}\text{NO}_4 + \text{H}^+$ : 324.1230 [ $M + \text{H}^+$ ]; found: 324.1235.

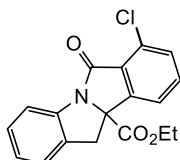

**Ethyl 7-chloro-6-oxo-6H-isindolo[2,1-a]indole-10b(11H)-carboxylate (39)**

Purification by flash chromatography (petroleum ether/ethyl acetate v/v = 10:1) yielding colorless oil (56.3 mg, 86% yield).  $^1\text{H}$  NMR (400 MHz,  $\text{CDCl}_3$ )  $\delta$  7.84 (d,  $J = 0.9$  Hz, 1H), 7.70 (d,  $J = 7.8$  Hz, 1H), 7.61-7.56 (m, 2H), 7.30 (t,  $J = 7.7$  Hz, 1H), 7.22 (d,  $J = 7.4$  Hz, 1H), 7.09 (t,  $J = 7.5$  Hz, 1H), 4.13 (q,  $J = 7.1$  Hz, 2H), 3.94 (d,  $J = 15.8$  Hz, 1H), 3.30 (d,  $J = 15.8$  Hz, 1H), 1.16 (t,  $J = 7.1$  Hz, 3H).  $^{13}\text{C}$  NMR (125 MHz,  $\text{CDCl}_3$ )  $\delta$  170.8, 166.8, 142.6, 139.7, 136.2, 135.2, 134.0, 133.2, 128.4, 125.3, 125.1, 125.1, 124.3, 116.7, 76.5, 62.8, 38.0, 13.9. HRMS (ESI):  $m/z$  calcd for  $\text{C}_{18}\text{H}_{14}\text{ClNO}_3 + \text{H}^+$ : 328.0735 [ $M + \text{H}^+$ ]; found: 328.07343.

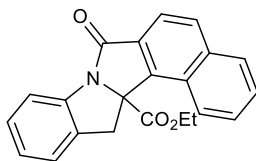

**Ethyl 7-oxo-7H-benzo[6,7]isindolo[2,1-a]indole-13a(13H)-carboxylate (40)**

Purification by flash chromatography (petroleum ether/ethyl acetate v/v = 10:1) yielding yellow oil (58.4 mg, 85% yield).  $^1\text{H}$  NMR (500 MHz,  $\text{CDCl}_3$ )  $\delta$  8.16-8.14 (m, 1H), 8.01-7.99 (m, 2H), 7.90 (d,  $J = 8.4$  Hz, 1H), 7.73 (d,  $J = 7.8$  Hz, 1H), 7.68-7.65 (m, 2H), 7.32 (t,  $J = 8.0$  Hz, 1H), 7.29 (d,  $J = 7.5$  Hz, 1H), 7.11 (td,  $J = 7.5$  Hz, 0.8 Hz, 1H), 4.46 (d,  $J = 15.6$  Hz, 1H), 4.08-4.00 (m, 2H), 3.41 (d,  $J = 15.6$  Hz, 1H), 0.99 (t,  $J = 7.1$  Hz, 3H).  $^{13}\text{C}$  NMR (125 MHz,  $\text{CDCl}_3$ )  $\delta$  171.1, 169.4, 144.1, 139.4, 136.0, 134.0, 131.4, 130.7, 129.3, 128.4, 128.2, 127.9, 127.3, 125.4, 124.8, 124.4, 62.7, 36.4, 13.8. HRMS (ESI):  $m/z$  calcd for  $\text{C}_{22}\text{H}_{17}\text{NO}_3 + \text{H}^+$ : 344.1281 [ $M + \text{H}^+$ ]; found: 344.1290.

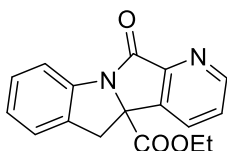

Ethyl 11-oxo-5H-pyrido[3',2':3,4]pyrrolo[1,2-a]indole-4b(11H)-carboxylate (**41**)

Purification by flash chromatography (petroleum ether/ethyl acetate v/v =10:1) yielding a white solid (31.1 mg, 53% yield). <sup>1</sup>H NMR (500 MHz, CDCl<sub>3</sub>) δ 8.87 (d, *J* = 4.6 Hz, 1H), 8.04 (dd, *J* = 7.8 Hz, 1.3 Hz, 1H), 7.80 (d, *J* = 7.9 Hz, 1H), 7.51 (dd, *J* = 7.8 Hz, 4.8 Hz, 1H), 7.33 (t, *J* = 7.7 Hz, 1H), 7.24 (d, *J* = 7.4 Hz, 1H), 7.12 (t, *J* = 7.5 Hz, 1H), 4.14 (q, *J* = 7.1 Hz, 2H), 3.97 (d, *J* = 15.7 Hz, 1H), 3.34 (d, *J* = 15.7 Hz, 1H), 1.15 (t, *J* = 7.1 Hz, 3H). <sup>13</sup>C NMR (125 MHz, CDCl<sub>3</sub>) δ 170.4, 165.8, 152.4, 151.2, 139.6, 139.0, 133.5, 131.5, 128.5, 126.4, 125.3, 125.2, 117.1, 74.5, 63.0, 38.1, 13.9. HRMS (ESI): *m/z* calcd for C<sub>17</sub>H<sub>14</sub>N<sub>2</sub>O<sub>3</sub>+H<sup>+</sup> 295.1077 [*M*+H<sup>+</sup>]; found: 295.1076.

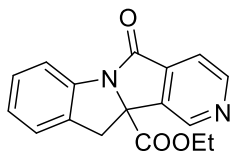

Ethyl 5-oxo-5H-pyrido[3',4':3,4]pyrrolo[1,2-a]indole-11a(11H)-carboxylate (**42**)

Purification by flash chromatography (petroleum ether/ethyl acetate v/v =10:1) yielding a white solid (34.6 mg, 59% yield). <sup>1</sup>H NMR (400 MHz, CDCl<sub>3</sub>) δ 9.03 (s, 1H), 8.87 (d, *J* = 4.8 Hz, 1H), 7.78 (d, *J* = 4.8 Hz, 1H), 7.73 (d, *J* = 7.8 Hz, 1H), 7.34 (t, *J* = 7.6 Hz, 1H), 7.26-7.25 (m, 1H), 7.14 (t, *J* = 7.4 Hz, 1H), 4.18 (q, *J* = 7.1 Hz, 2H), 3.97 (d, *J* = 15.8 Hz, 1H), 3.39 (d, *J* = 15.8 Hz, 1H), 1.19 (t, *J* = 7.1 Hz, 3H). <sup>13</sup>C NMR (125 MHz, CDCl<sub>3</sub>) δ 170.1, 165.9, 151.0, 145.3, 141.4, 139.2, 138.6, 134.0, 128.5, 125.5, 125.4, 118.5, 116.9, 76.4, 63.1, 37.9, 13.9. HRMS (ESI): *m/z* calcd for C<sub>17</sub>H<sub>14</sub>N<sub>2</sub>O<sub>3</sub>+H<sup>+</sup> 295.1077 [*M*+H<sup>+</sup>]; found: 295.1078.

## 7. Supplementary References

- [S1] Huang, H.; Ye, J.-H.; Zhu, L.; Ran, C.-K.; Miao, M.; Wang, W.; Chen, H.; Zhou, W.-J.; Lan, Y.; Yu B. and Yu. D.-G. Visible-Light-Driven Anti-Markovnikov Hydrocarboxylation of Acrylates and Styrenes with CO<sub>2</sub>. *CCS Chem.* **2020**, 2, 1746–1756.
- [S2] Deng, Y.; Wei, X.-J.; Wang, H.; Sun, Y.; Nođ, T.; Wang, X. Disulfide-Catalyzed Visible-Light-Mediated Oxidative Cleavage of C = C Bonds and Evidence of an Olefin–Disulfide Charge-Transfer Complex. *Angew. Chem., Int. Ed.* **2017**, 56, 832– 836.
- [S3] Chen, S.; Meervelt, Luc Van.; Eycken, E. V. Van der. and Sharma, U. K. Visible-Light-Driven Palladium-Catalyzed Radical Tandem Dearomatization of Indoles with Unactivated Alkenes. *Org. Lett.* **2022**, 24, 5, 1213–1218.
- [S4] Peng, Z.; Yin, H.; Zhang, H.; Jia, T. Regio- and Stereoselective Photoredox-Catalyzed Atom Transfer Radical Addition of Thiosulfonates to Aryl Alkynes. *Org. Lett.* **2020**, 22, 5885– 5889.
- [S5] Žula, A.; edziak, I. B.; Kikelj, D. and Ilaš, J. Synthesis and Evaluation of Spumigin Analogues Library with Thrombin Inhibitory Activity. *Mar. Drugs.* **2018**, 16, 413-432.
- [S6] Pereira, R.; Pfeifer, L.; Fournier, J.; Gouverneur, V.; Cvengroš, J. Twisting the ethano-Tröger's base: the bisamide. *Org. Biomol. Chem.* **2017**, 15, 628– 633.
- [S7] Zhang, W.; Chen, P.-H.; Liu, G.-S. Enantioselective Palladium(II)-Catalyzed Intramolecular Aminoarylation of Alkenes by Dual N-H and Aryl C-H Bond Cleavage. *Angew. Chem., Int. Ed.* **2017**, 56, 5336– 5340.
- [S8] Marchese, A. D.; Lind, F.; Mahon, Á. E.; Yoon, H.; Lautens, M. Forming Benzylic Iodides via a Nickel Catalyzed Diastereoselective Dearomative Carboiodination Reaction of Indoles. *Angew. Chem., Int. Ed.* **2019**, 58, 5095– 5099.
- [S9] Shen, C.; Liu, R.-R.; Fan, R.-J.; Li, Y.-L.; Xu, T.-F.; Gao, J.-R.; Jia, Y.-X. Enantioselective Arylative Dearomatization of Indoles via Pd-Catalyzed Intramolecular Reductive Heck Reactions. *J. Am. Chem. Soc.* **2015**, 137, 4936– 4939.
- [S10] Petrone, D. A.; Yen, A.; Zeidan, N.; Lautens, M. Dearomative Indole Bisfunctionalization via a Diastereoselective Palladium-Catalyzed Arylcyanation. *Org. Lett.* **2015**, 17, 4838– 4841.
- [S11] Qin, X.; Lee, M. W. Y.; Zhou, J. S. Nickel-Catalyzed Asymmetric Reductive Heck Cyclization of Aryl Halides to Afford Indolines. *Angew. Chem., Int. Ed.* **2017**, 56, 12723– 12726.
- [S12] Yu, D.; To, W.-P.; Liu, Y.; Wu, L.-L.; You, T.; Ling, J.; Che, C.-M. Direct Photo-Induced Reductive Heck Cyclization of Indoles for the Efficient Preparation of Polycyclic Indoliny Compounds. *Chem. Sci.* **2021**, 12, 14050– 14058.

## 8. X-ray crystal structure data of compounds R1a and 1

### 8.1 X-ray crystallographic data of **R1a** (CCDC 2183419)

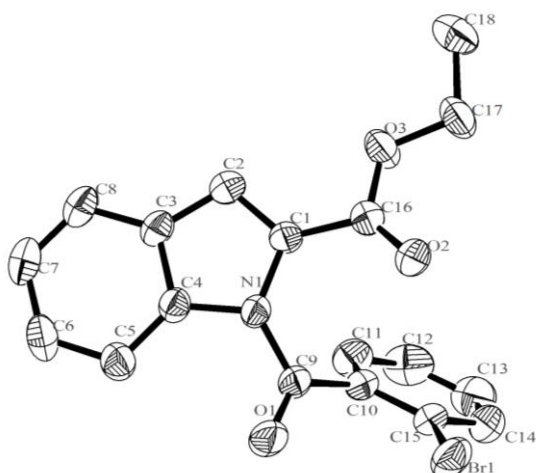

|                                                               |                                                   |                                                   |                                 |
|---------------------------------------------------------------|---------------------------------------------------|---------------------------------------------------|---------------------------------|
| Bond precision:                                               | C-C = 0.0069 Å                                    | Wavelength=1.54184                                |                                 |
| Cell:                                                         | a=7.8811(6)<br>alpha=66.055(6)                    | b=10.3618(5)<br>beta=78.039(6)                    | c=10.9560(8)<br>gamma=88.232(5) |
| Temperature:                                                  | 293 K                                             |                                                   |                                 |
|                                                               | Calculated                                        | Reported                                          |                                 |
| Volume                                                        | 798.52(10)                                        | 798.52(10)                                        |                                 |
| Space group                                                   | P -1                                              | P -1                                              |                                 |
| Hall group                                                    | -P 1                                              | -P 1                                              |                                 |
| Moiety formula                                                | C <sub>18</sub> H <sub>14</sub> BrNO <sub>3</sub> | C <sub>18</sub> H <sub>14</sub> BrNO <sub>3</sub> |                                 |
| Sum formula                                                   | C <sub>18</sub> H <sub>14</sub> BrNO <sub>3</sub> | C <sub>18</sub> H <sub>14</sub> BrNO <sub>3</sub> |                                 |
| Mr                                                            | 372.20                                            | 372.21                                            |                                 |
| Dx, g cm <sup>-3</sup>                                        | 1.548                                             | 1.548                                             |                                 |
| Z                                                             | 2                                                 | 2                                                 |                                 |
| Mu (mm <sup>-1</sup> )                                        | 3.635                                             | 3.635                                             |                                 |
| F000                                                          | 376.0                                             | 376.0                                             |                                 |
| F000                                                          | 375.61                                            |                                                   |                                 |
| h, k, lmax                                                    | 9, 12, 13                                         | 9, 12, 13                                         |                                 |
| Nref                                                          | 3199                                              | 3096                                              |                                 |
| Tmin, Tmax                                                    | 0.489, 0.559                                      | 0.460, 1.000                                      |                                 |
| Tmin'                                                         | 0.444                                             |                                                   |                                 |
| Correction method= # Reported T Limits: Tmin=0.460 Tmax=1.000 |                                                   |                                                   |                                 |
| AbsCorr = MULTI-SCAN                                          |                                                   |                                                   |                                 |
| Data completeness= 0.968                                      |                                                   | heta(max)= 73.234                                 |                                 |
| R(reflections)= 0.0673( 2967)                                 |                                                   | wR2(reflections)= 0.1707( 3096)                   |                                 |
| S = 1.029                                                     |                                                   | Npar= 209                                         |                                 |
| Displacement ellipsoids are drawn at 50% probability level    |                                                   |                                                   |                                 |

## 8.2 X-ray crystallographic data of **1** (CCDC 2162244)

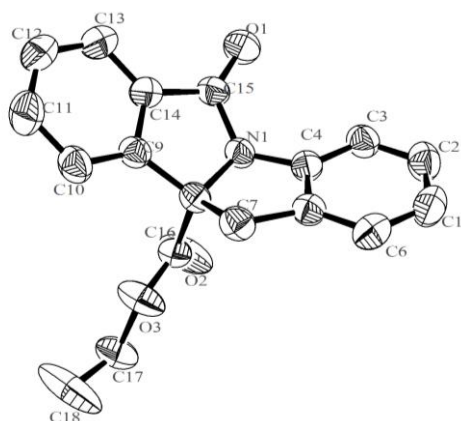

|                                                                |                                                 |                                                 |              |
|----------------------------------------------------------------|-------------------------------------------------|-------------------------------------------------|--------------|
| Bond precision:                                                | C-C = 0.0078 Å                                  | Wavelength=1.54184                              |              |
| Cell:                                                          | a=8.9025(3)                                     | b=5.6087(2)                                     | c=15.0571(5) |
|                                                                | alpha=90                                        | beta=100.429(3)                                 | gamma=90     |
| Temperature:                                                   | 293 K                                           |                                                 |              |
|                                                                | Calculated                                      | Reported                                        |              |
| Volume                                                         | 739.40(4)                                       | 739.40(5)                                       |              |
| Space group                                                    | P 21                                            | P 1 21 1                                        |              |
| Hall group                                                     | P 2yb                                           | P 2yb                                           |              |
| Moiety formula                                                 | C <sub>18</sub> H <sub>15</sub> NO <sub>3</sub> | C <sub>18</sub> H <sub>15</sub> NO <sub>3</sub> |              |
| Sum formula                                                    | C <sub>18</sub> H <sub>15</sub> NO <sub>3</sub> | C <sub>18</sub> H <sub>15</sub> NO <sub>3</sub> |              |
| Mr                                                             | 293.31                                          | 293.31                                          |              |
| Dx, g cm <sup>-3</sup>                                         | 1.317                                           | 1.317                                           |              |
| Z                                                              | 2                                               | 2                                               |              |
| Mu (mm <sup>-1</sup> )                                         | 0.734                                           | 0.734                                           |              |
| F000                                                           | 308.0                                           | 308.0                                           |              |
| F000                                                           | 308.96                                          |                                                 |              |
| h, k, lmax                                                     | 11, 6, 18                                       | 10, 6, 18                                       |              |
| Nref                                                           | 2925 [1620]                                     | 2660                                            |              |
| Tmin, Tmax                                                     | 0.845, 0.870                                    | 0.829, 1.000                                    |              |
| Tmin'                                                          | 0.845                                           |                                                 |              |
| Correction method= # Reported T Limits: Tmin= 0.829 Tmax=1.000 |                                                 |                                                 |              |
| AbsCorr = MULTI-SCAN                                           |                                                 |                                                 |              |
| Data completeness= 1.64/0.91                                   |                                                 | heta(max)= 72.752                               |              |
| R(reflections)= 0.0621( 2612)                                  |                                                 | wR2(reflections)= 0.1862( 2660)                 |              |
| S = 1.043                                                      |                                                 | Npar= 200                                       |              |
| Displacement ellipsoids are drawn at 50% probability level     |                                                 |                                                 |              |

## 9. NMR Spectra of related compounds

$^1\text{H}$  NMR Spectra of compound **R1a** (500 MHz,  $\text{CDCl}_3$ )

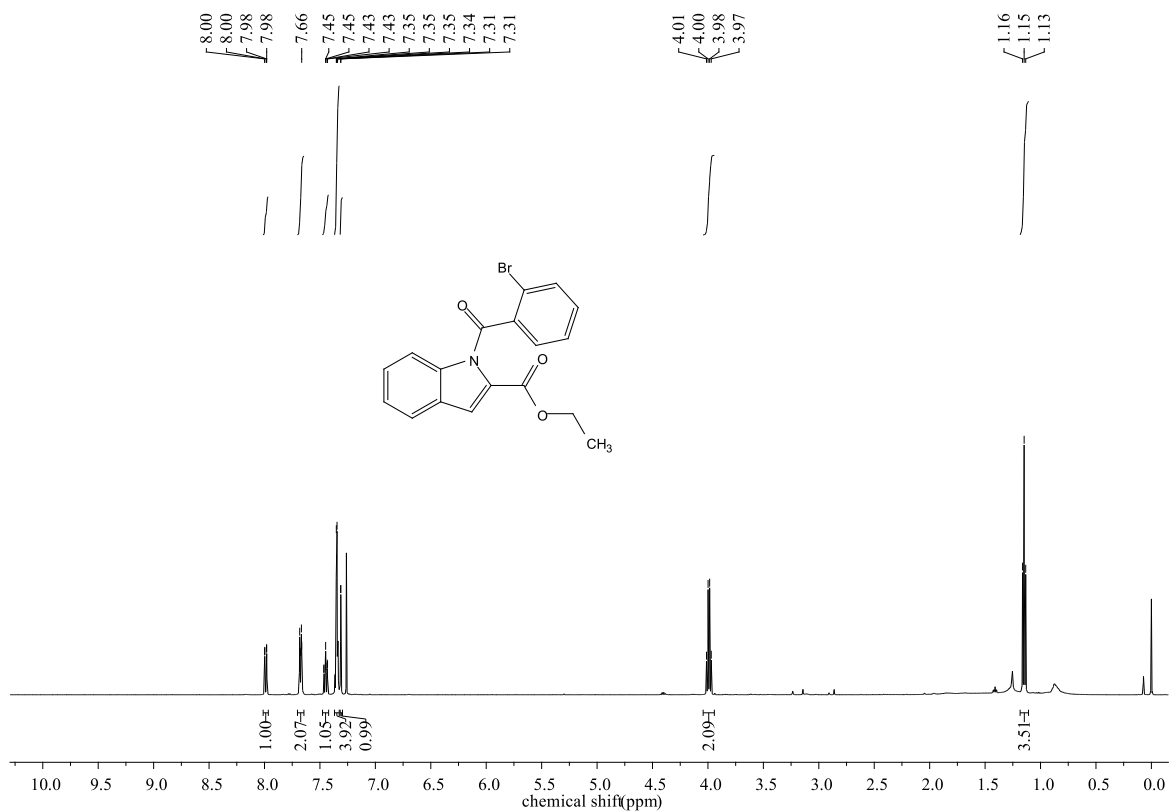

$^{13}\text{C}$  NMR Spectra of compound **R1a** (125 MHz,  $\text{CDCl}_3$ )

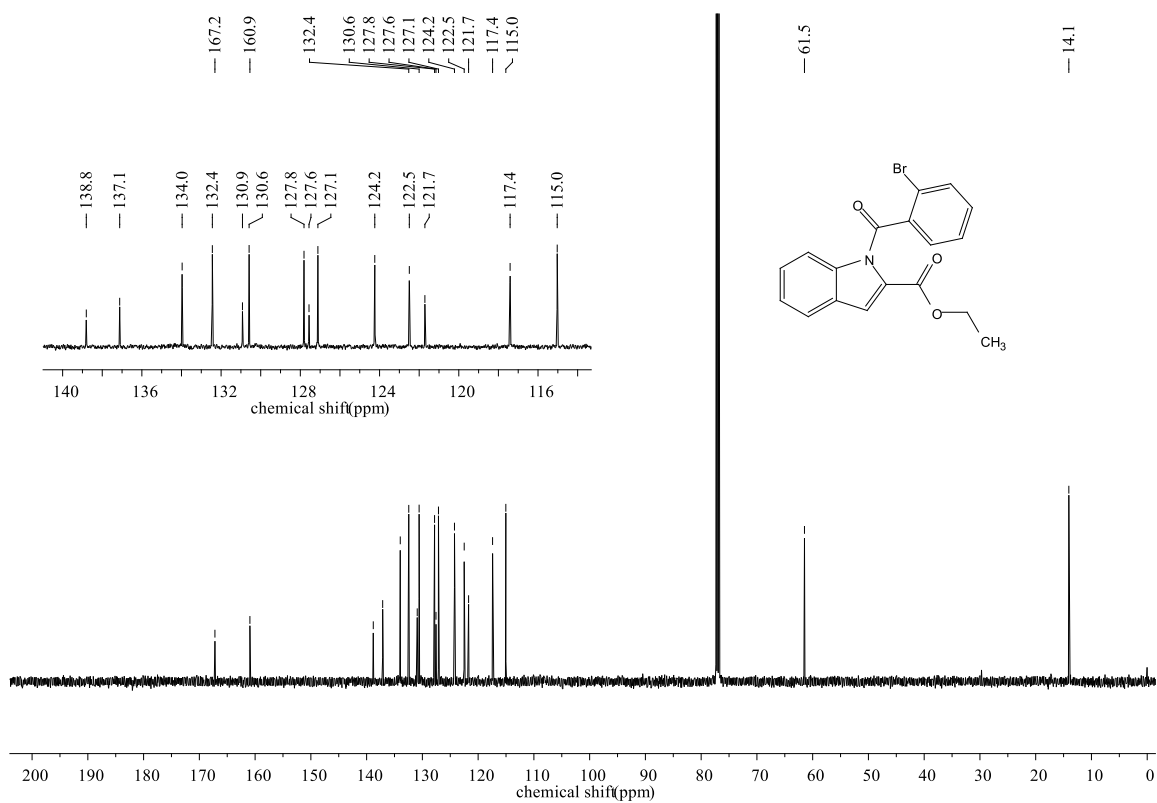

<sup>1</sup>H NMR Spectra of compound **R1b** (500 MHz, CDCl<sub>3</sub>)

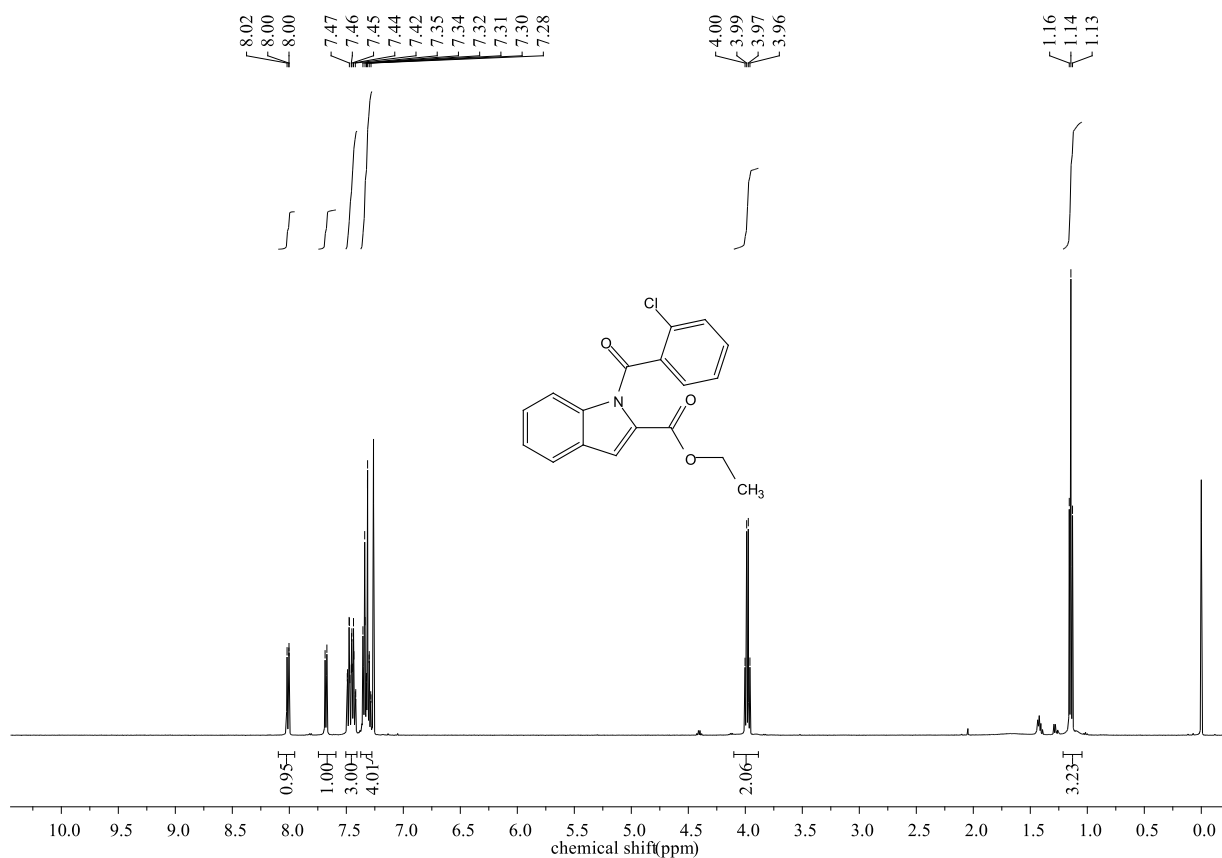

<sup>13</sup>C NMR Spectra of compound **R1b** (125 MHz, CDCl<sub>3</sub>)

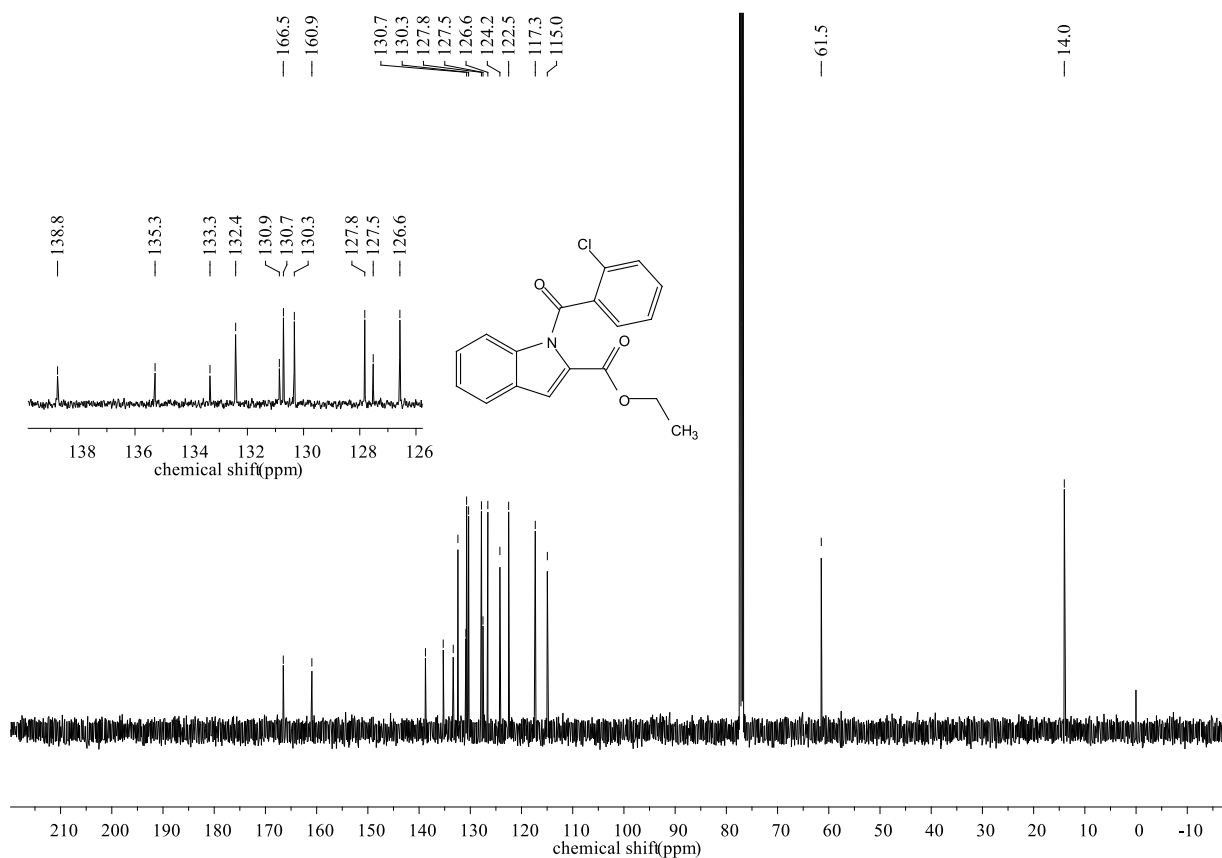

<sup>1</sup>H NMR Spectra of compound **R1c** (400 MHz, CDCl<sub>3</sub>)

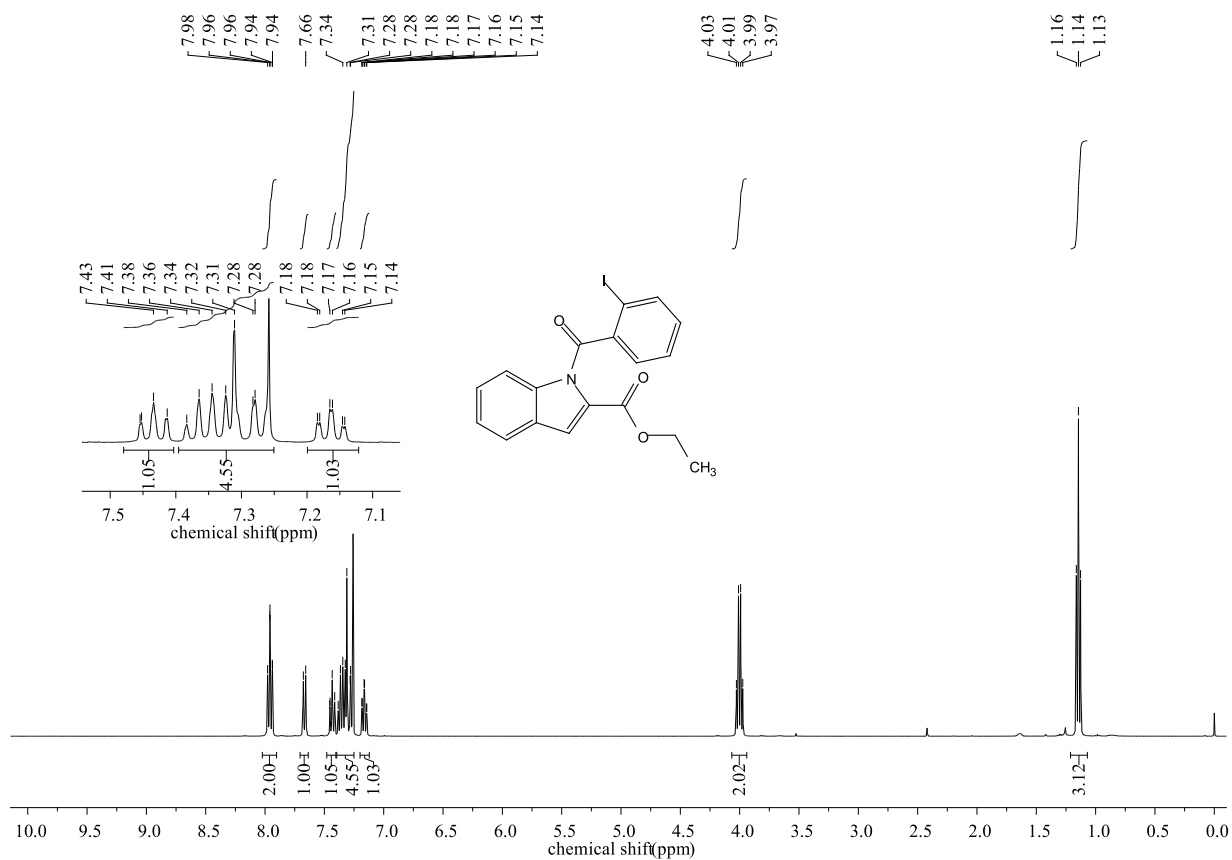

<sup>1</sup>H NMR Spectra of compound **R2a** (500 MHz, CDCl<sub>3</sub>)

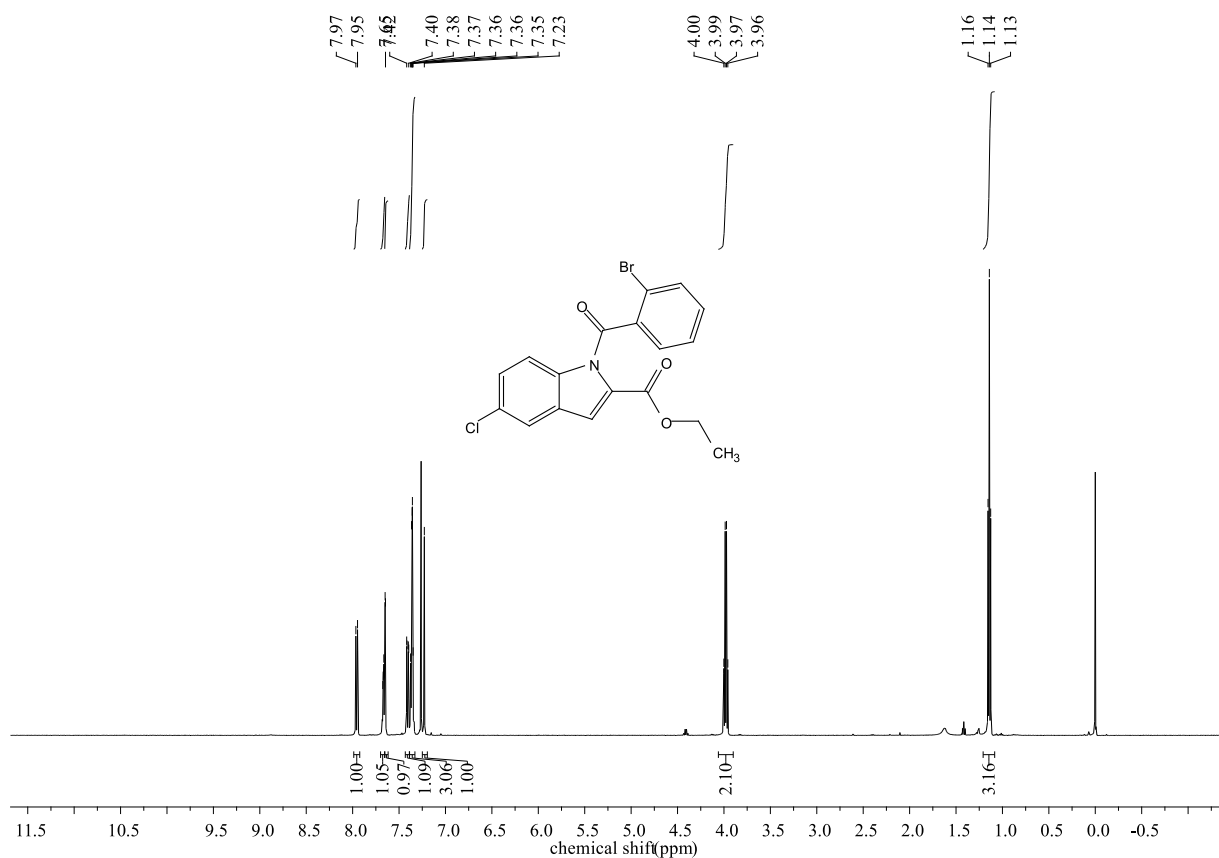

<sup>13</sup>C NMR Spectra of compound **R2a** (125 MHz, CDCl<sub>3</sub>)

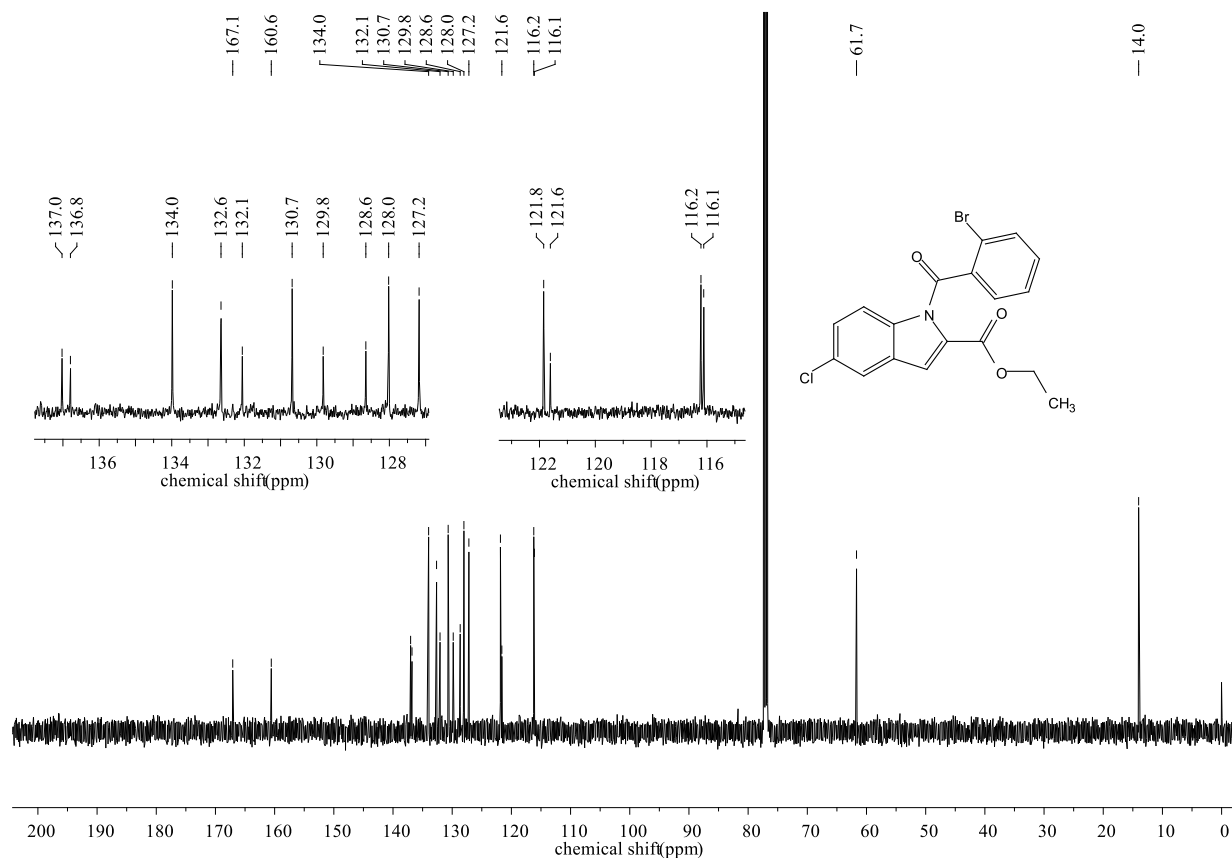

<sup>1</sup>H NMR Spectra of compound **R2b** (400 MHz, CDCl<sub>3</sub>)

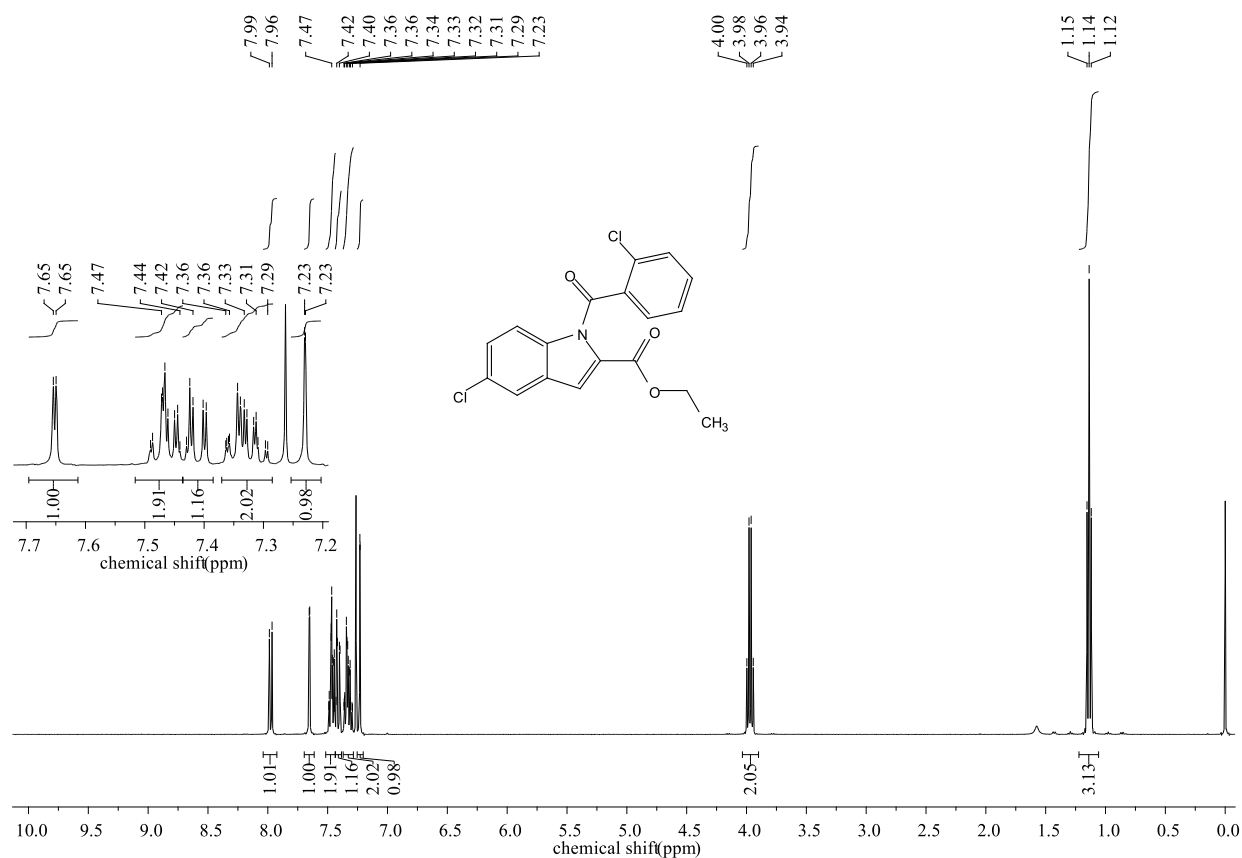

<sup>13</sup>C NMR Spectra of compound **R2b** (100 MHz, CDCl<sub>3</sub>)

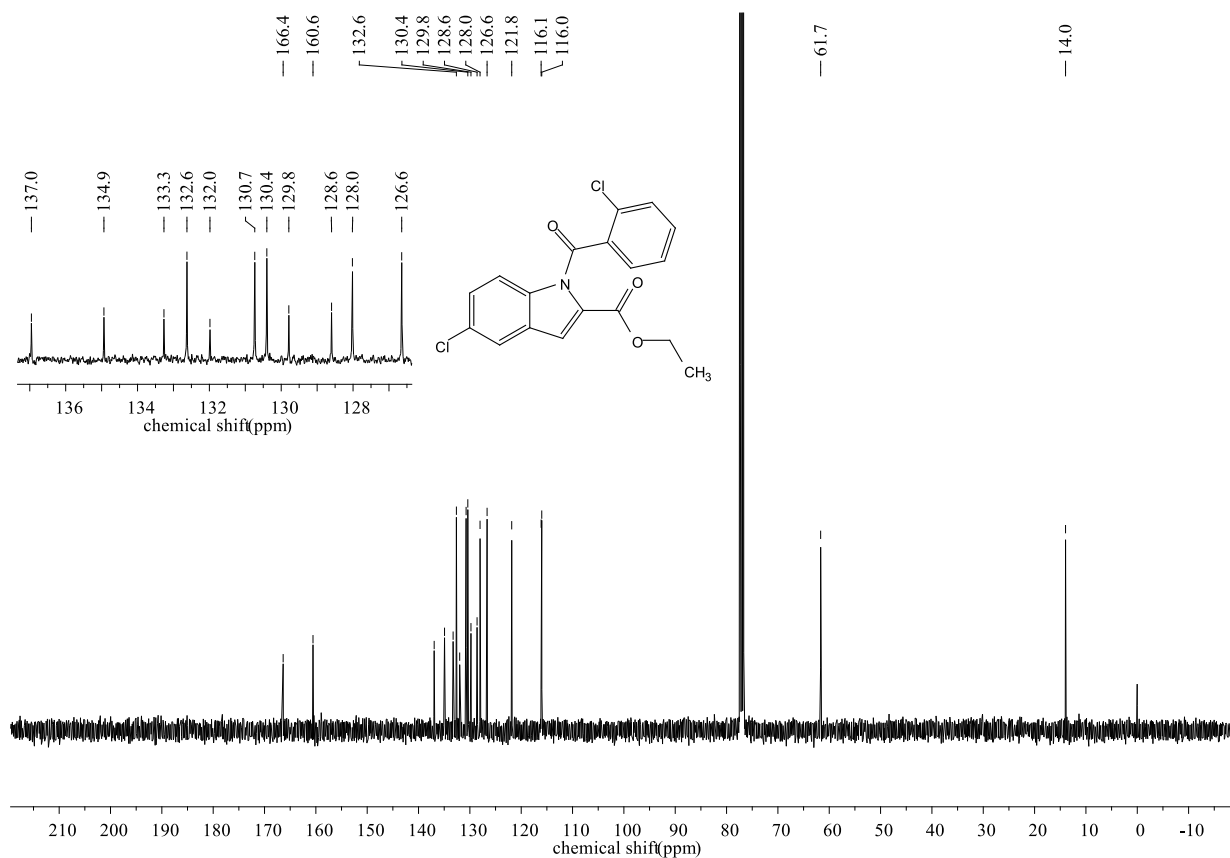

<sup>1</sup>H NMR Spectra of compound **R2c** (500 MHz, CDCl<sub>3</sub>)

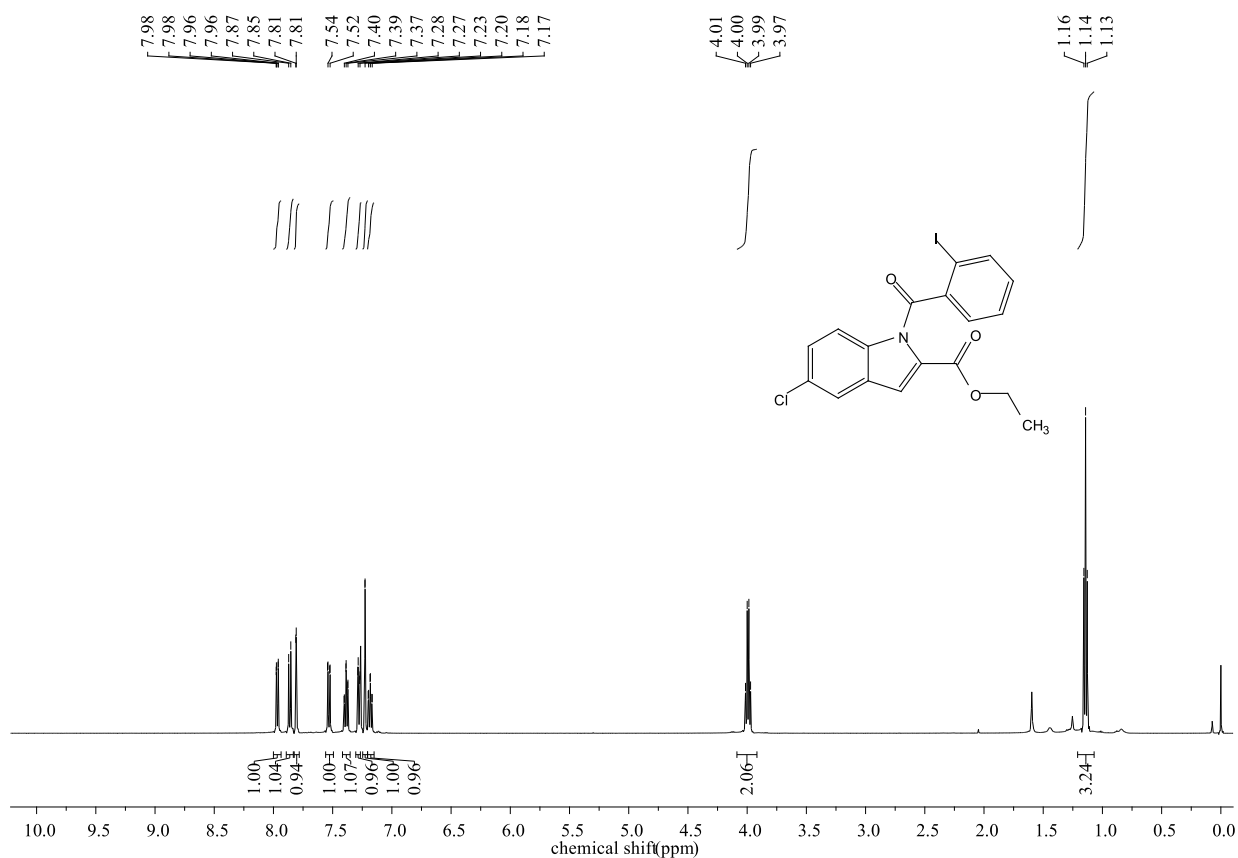

<sup>13</sup>C NMR Spectra of compound **R2c** (125 MHz, CDCl<sub>3</sub>)

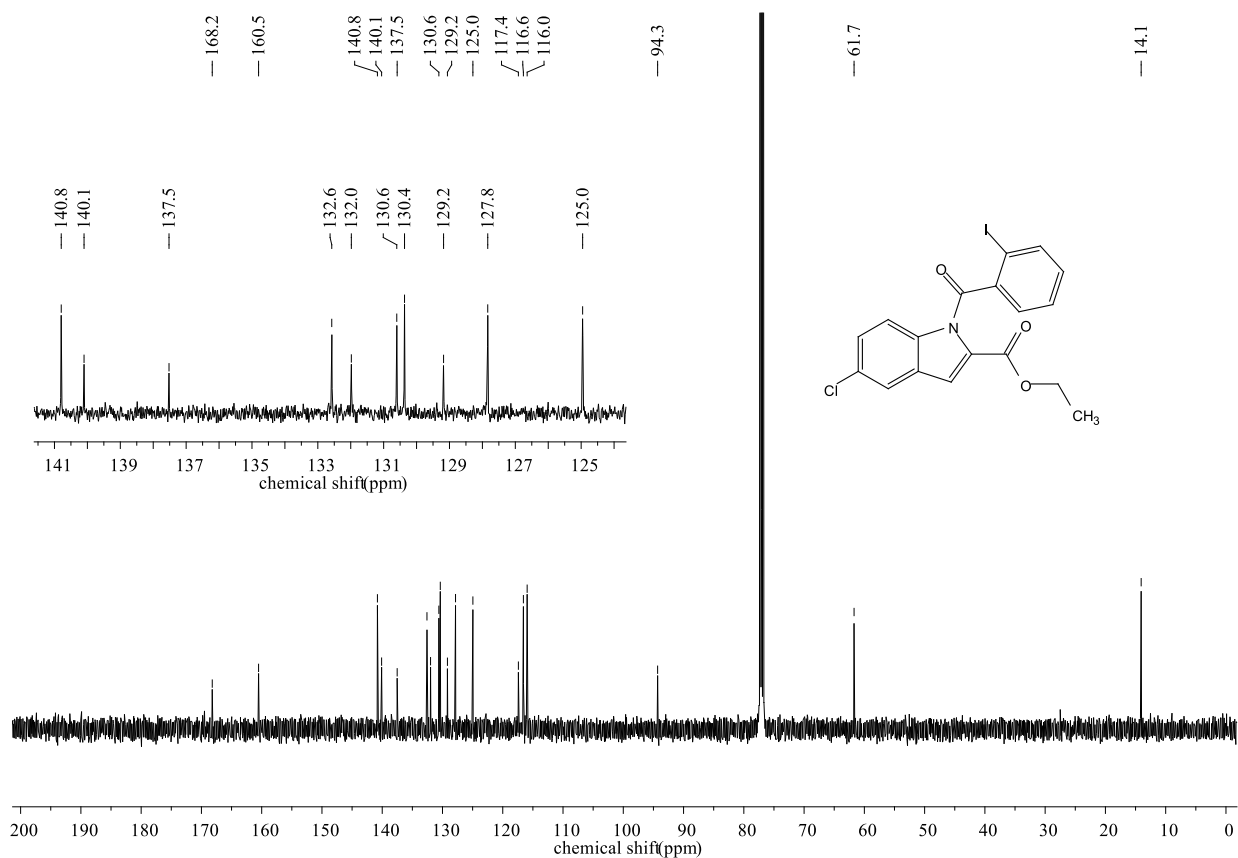

<sup>1</sup>H NMR Spectra of compound **R3a** (400 MHz, CDCl<sub>3</sub>)

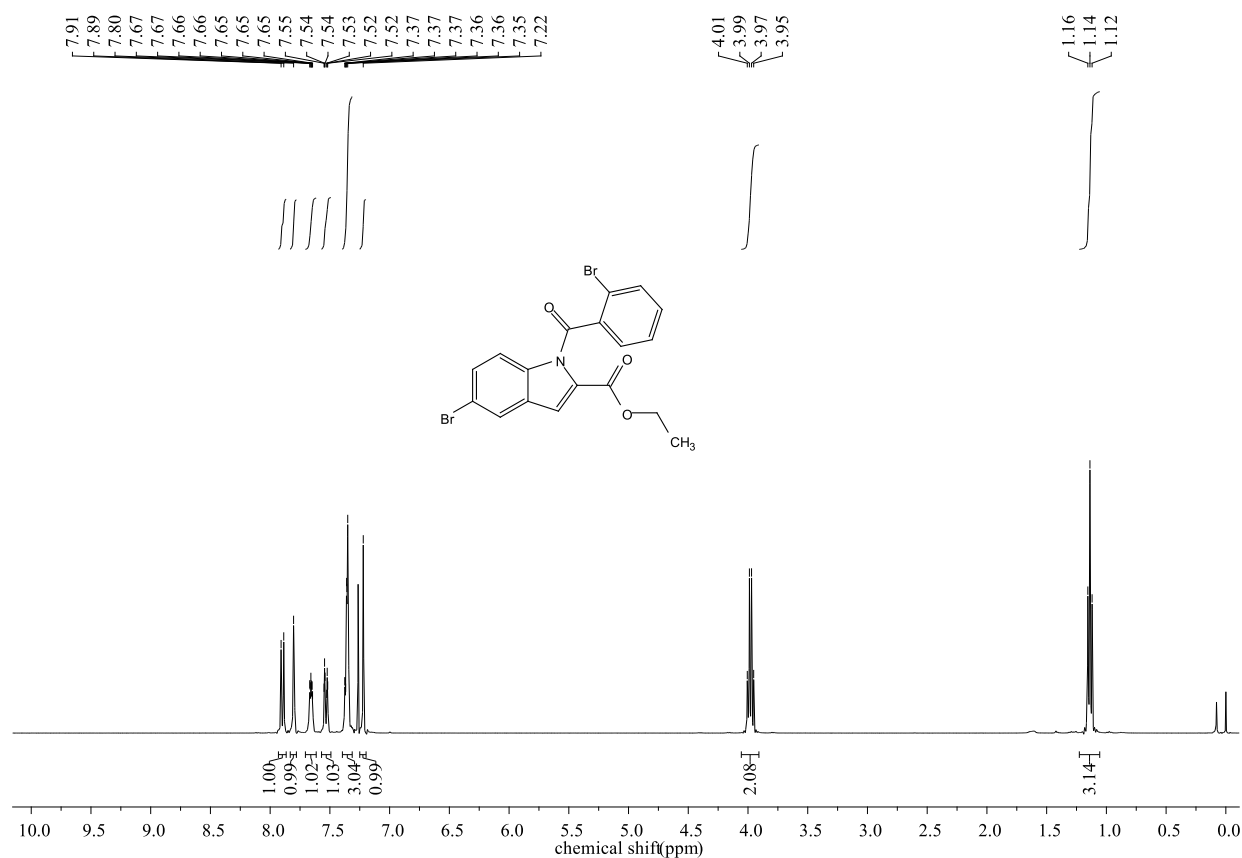

<sup>13</sup>C NMR Spectra of compound **R3a** (125 MHz, CDCl<sub>3</sub>)

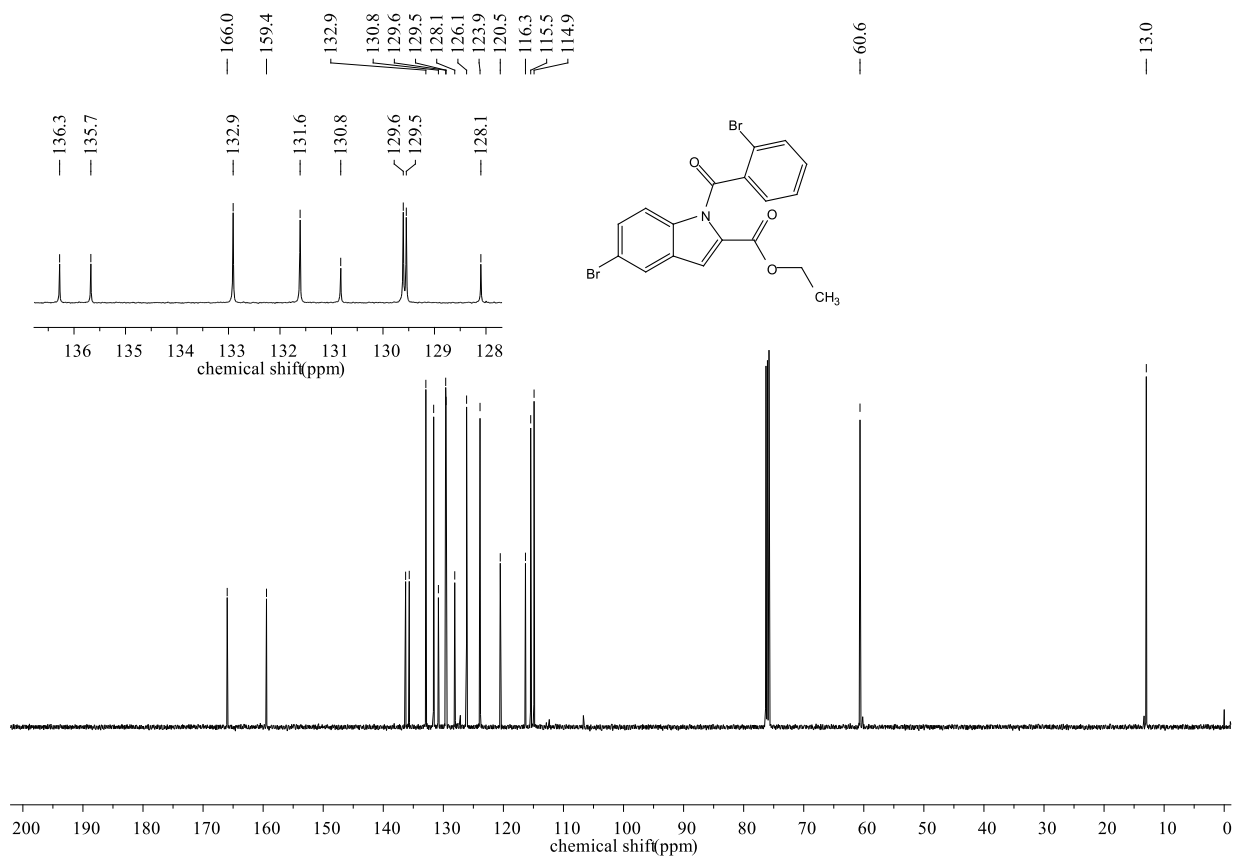

<sup>1</sup>H NMR Spectra of compound **R3b** (500 MHz, CDCl<sub>3</sub>)

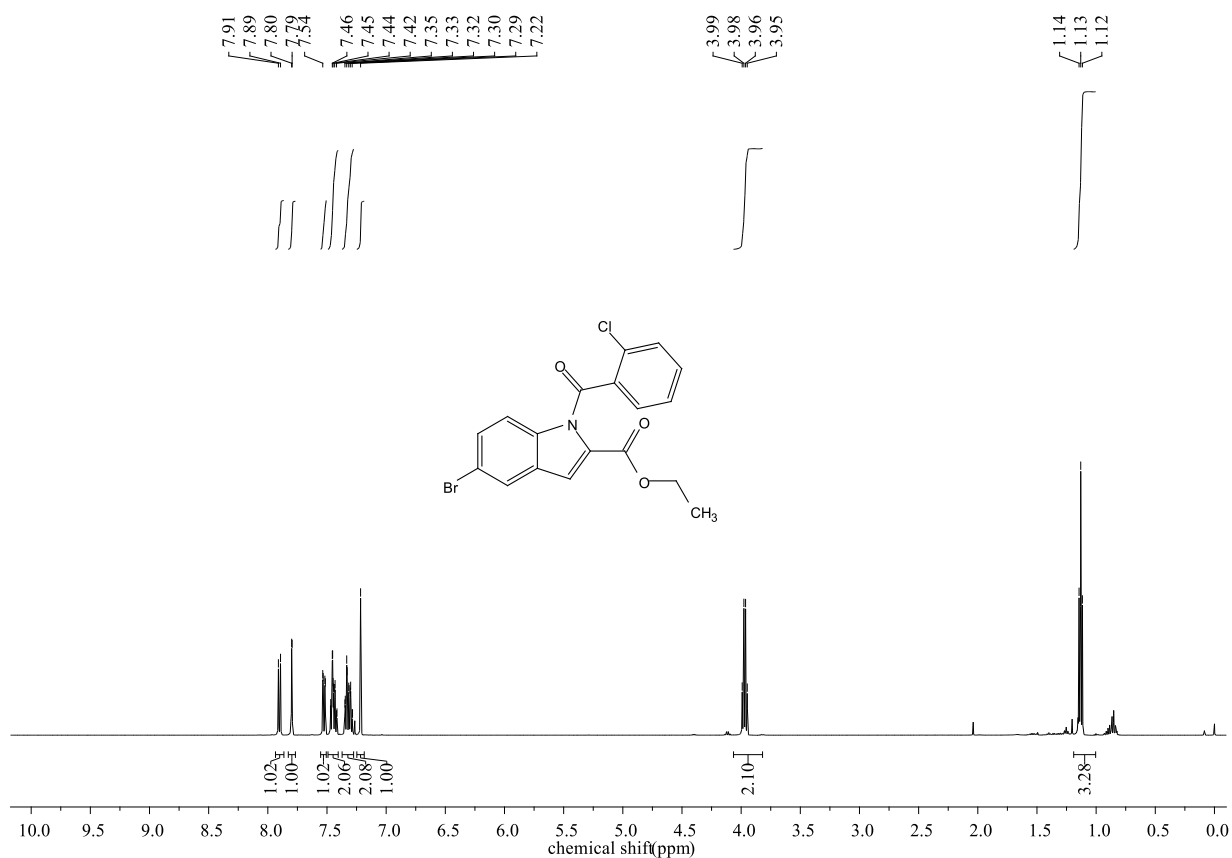

<sup>13</sup>C NMR Spectra of compound **R3b** (100 MHz, CDCl<sub>3</sub>)

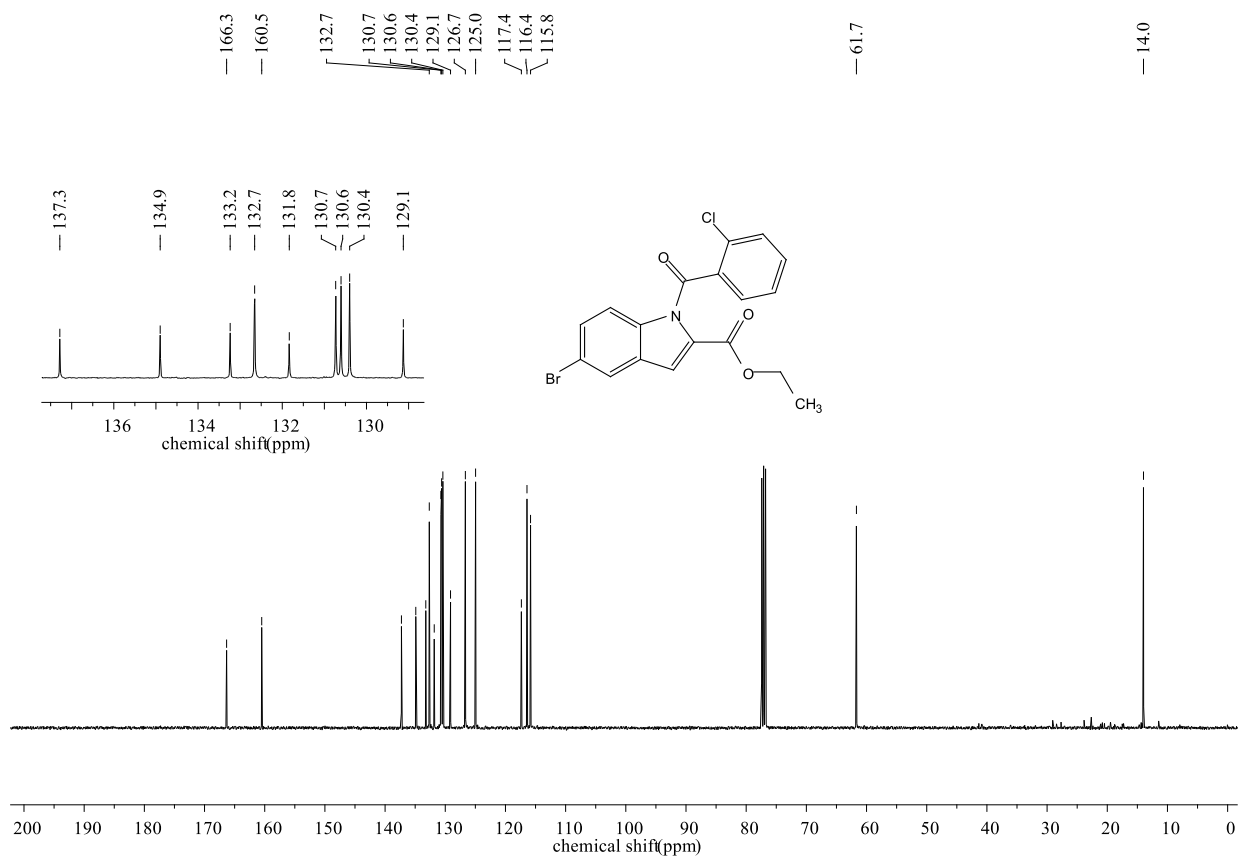

<sup>1</sup>H NMR Spectra of compound **R3c** (500 MHz, CDCl<sub>3</sub>)

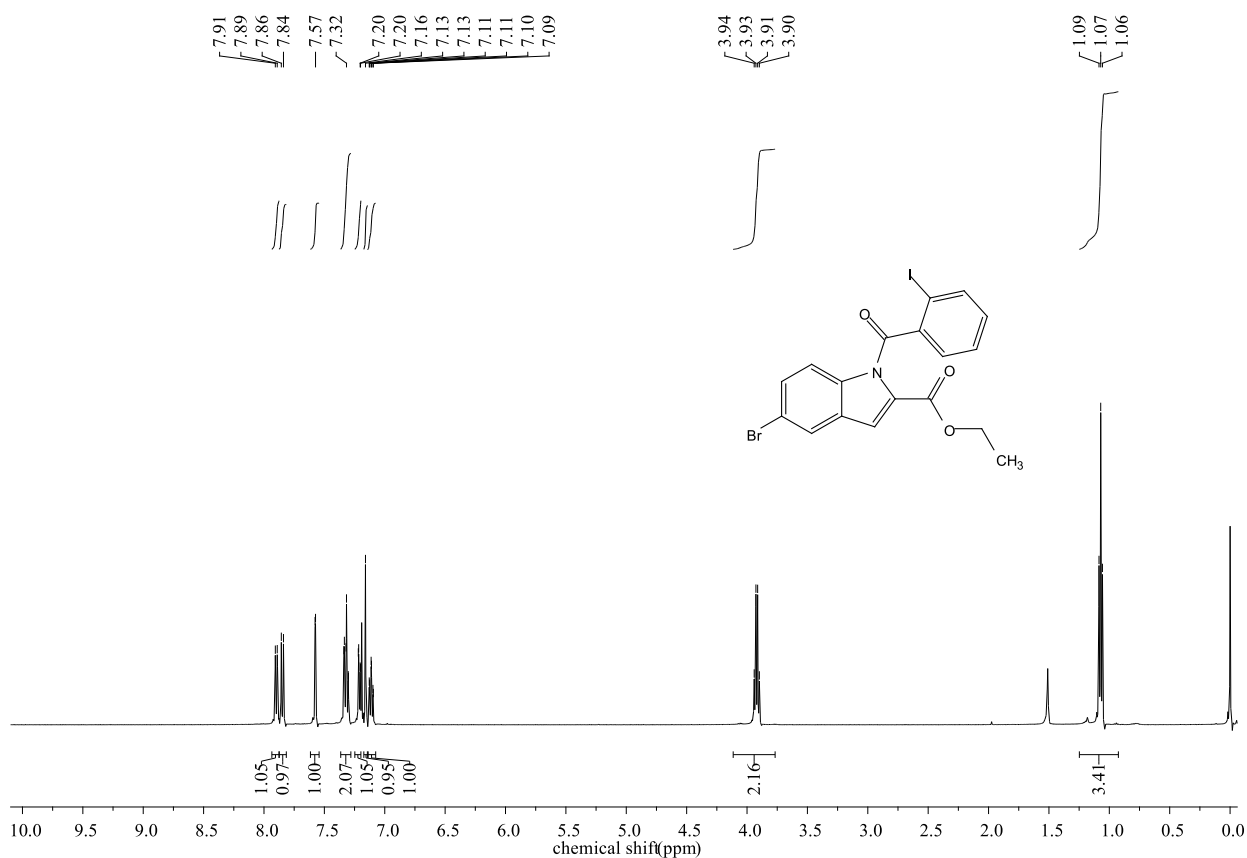

<sup>13</sup>C NMR Spectra of compound **R3c** (125 MHz, CDCl<sub>3</sub>)

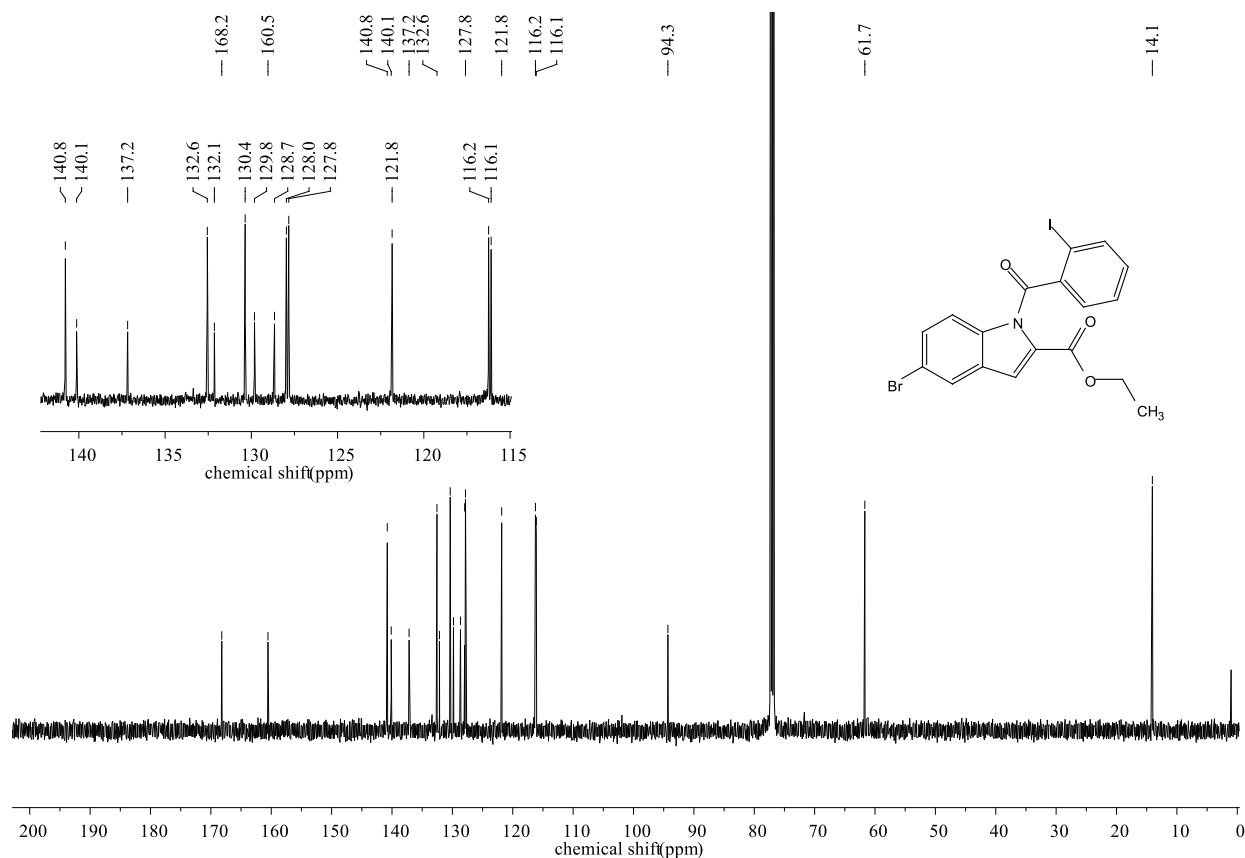

<sup>1</sup>H NMR Spectra of compound **R4a** (400 MHz, CDCl<sub>3</sub>)

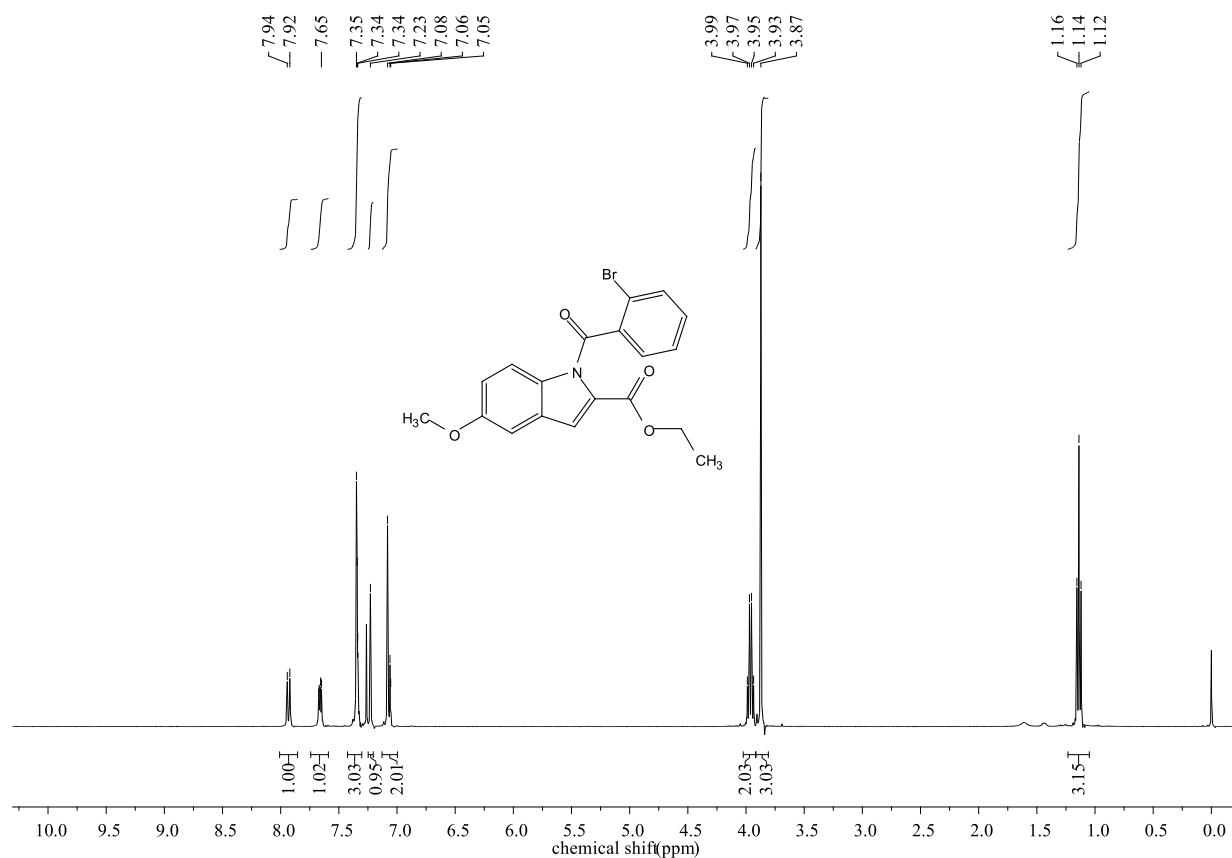

<sup>13</sup>C NMR Spectra of compound **R4a** (100 MHz, CDCl<sub>3</sub>)

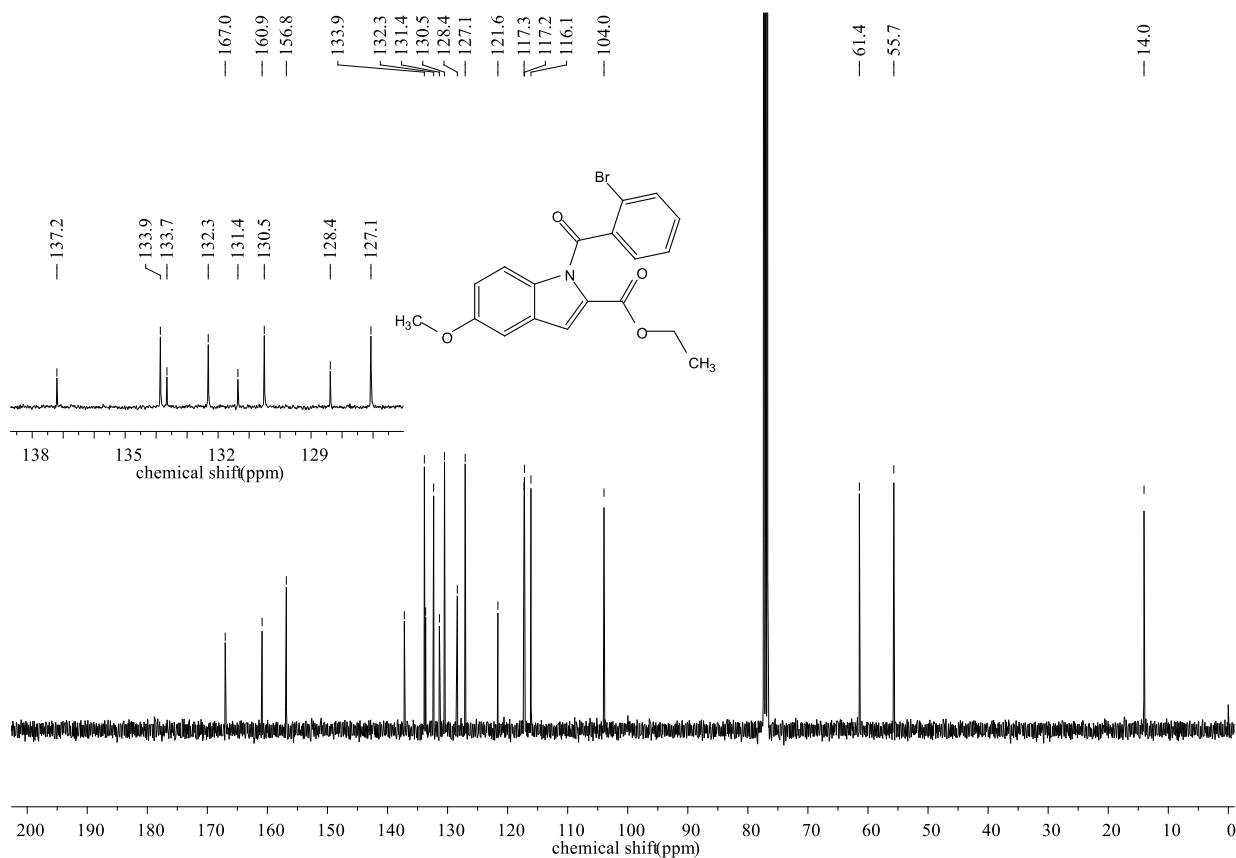

<sup>1</sup>H NMR Spectra of compound **R4b** (400 MHz, CDCl<sub>3</sub>)

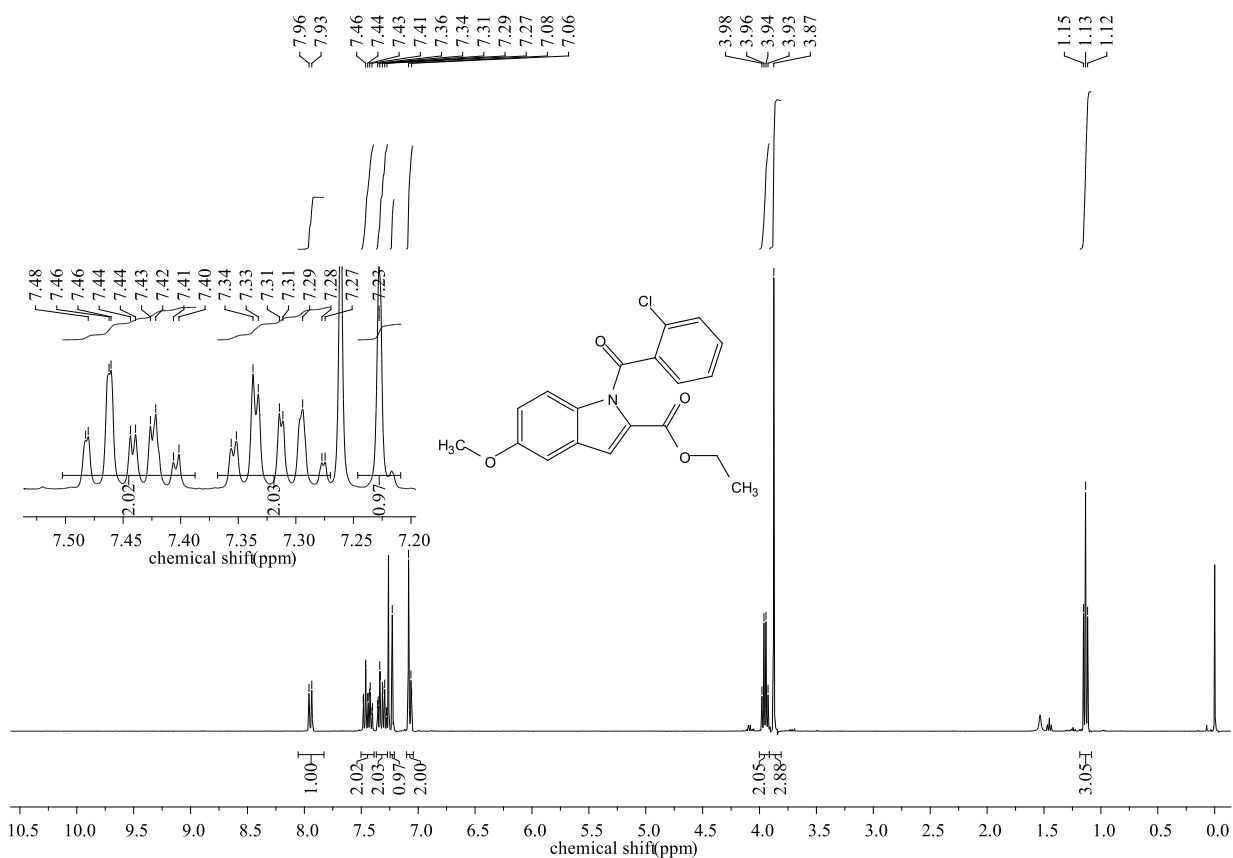

<sup>13</sup>C NMR Spectra of compound **R4b** (100 MHz, CDCl<sub>3</sub>)

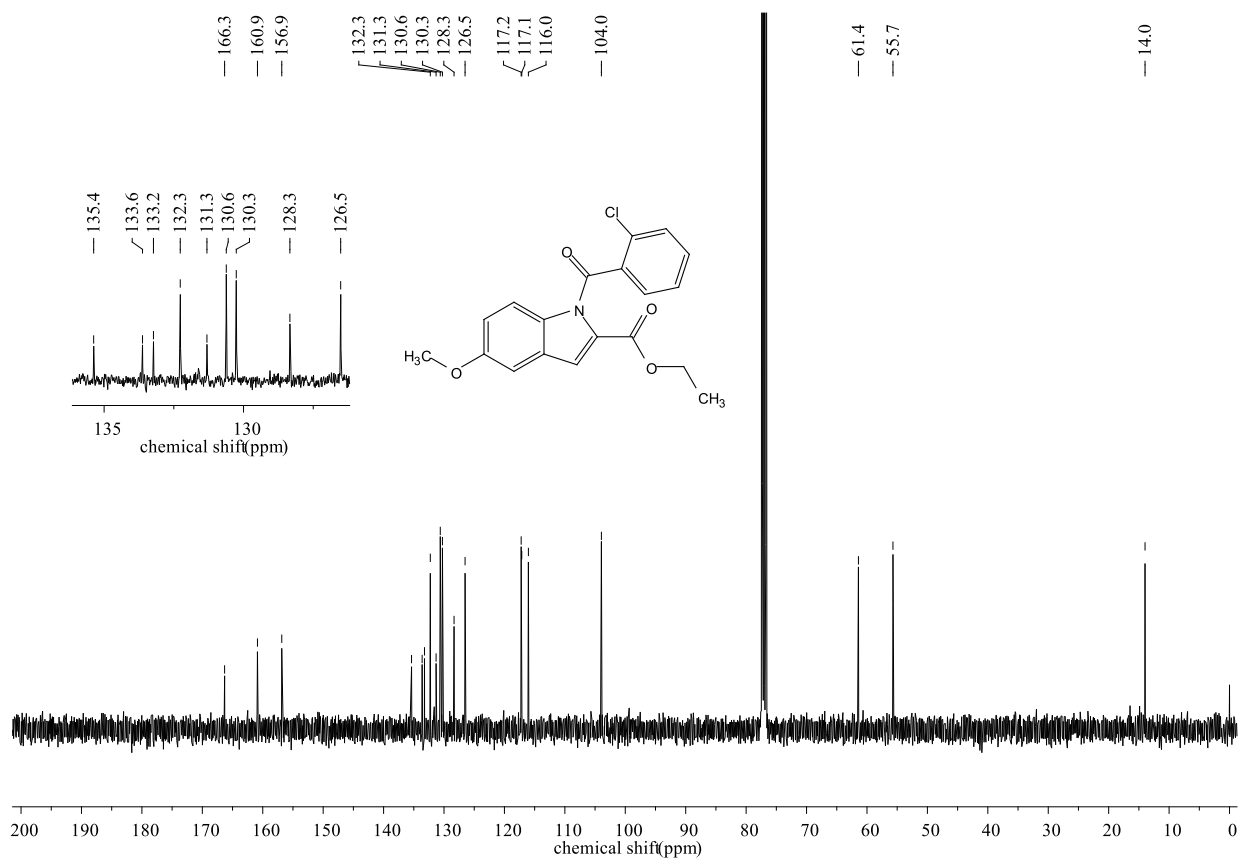

<sup>1</sup>H NMR Spectra of compound **R4c** (500 MHz, CDCl<sub>3</sub>)

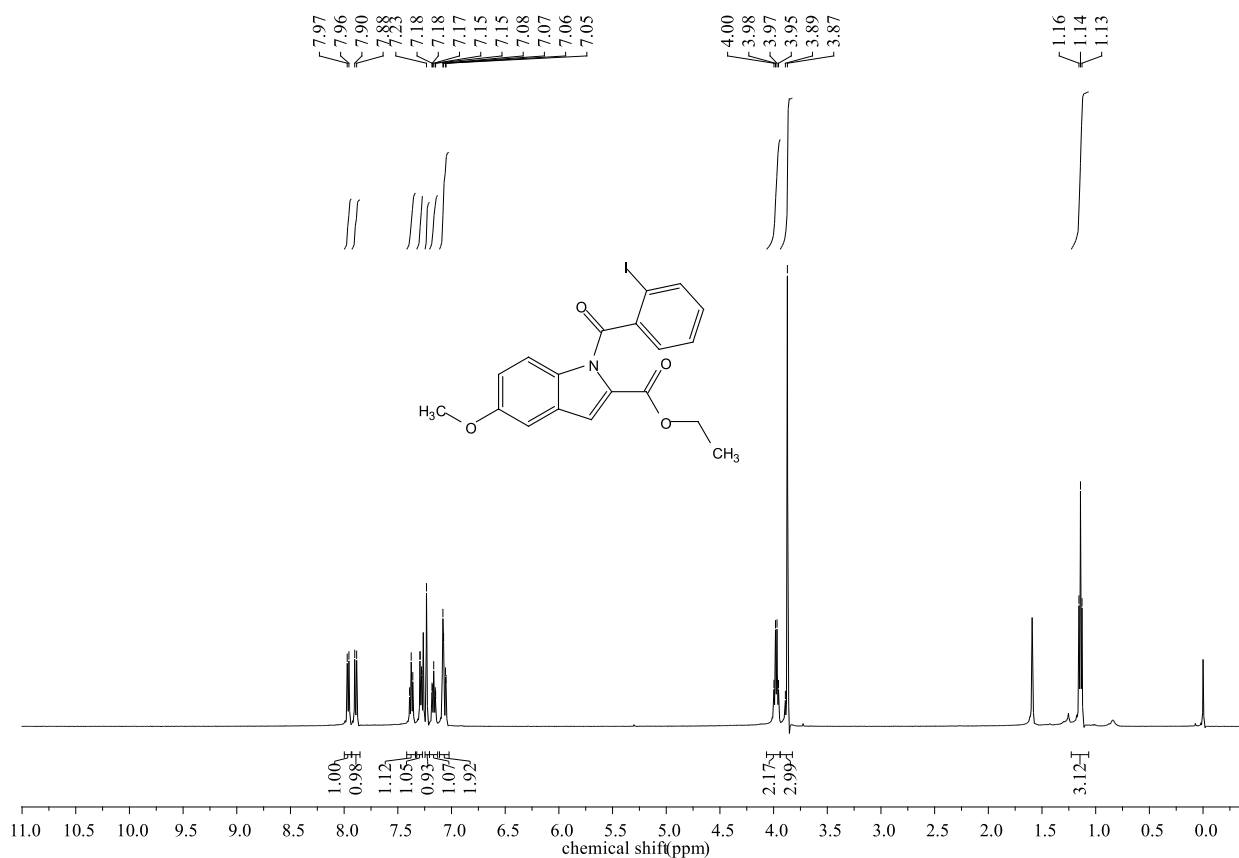

<sup>13</sup>C NMR Spectra of compound **R4c** (125 MHz, CDCl<sub>3</sub>)

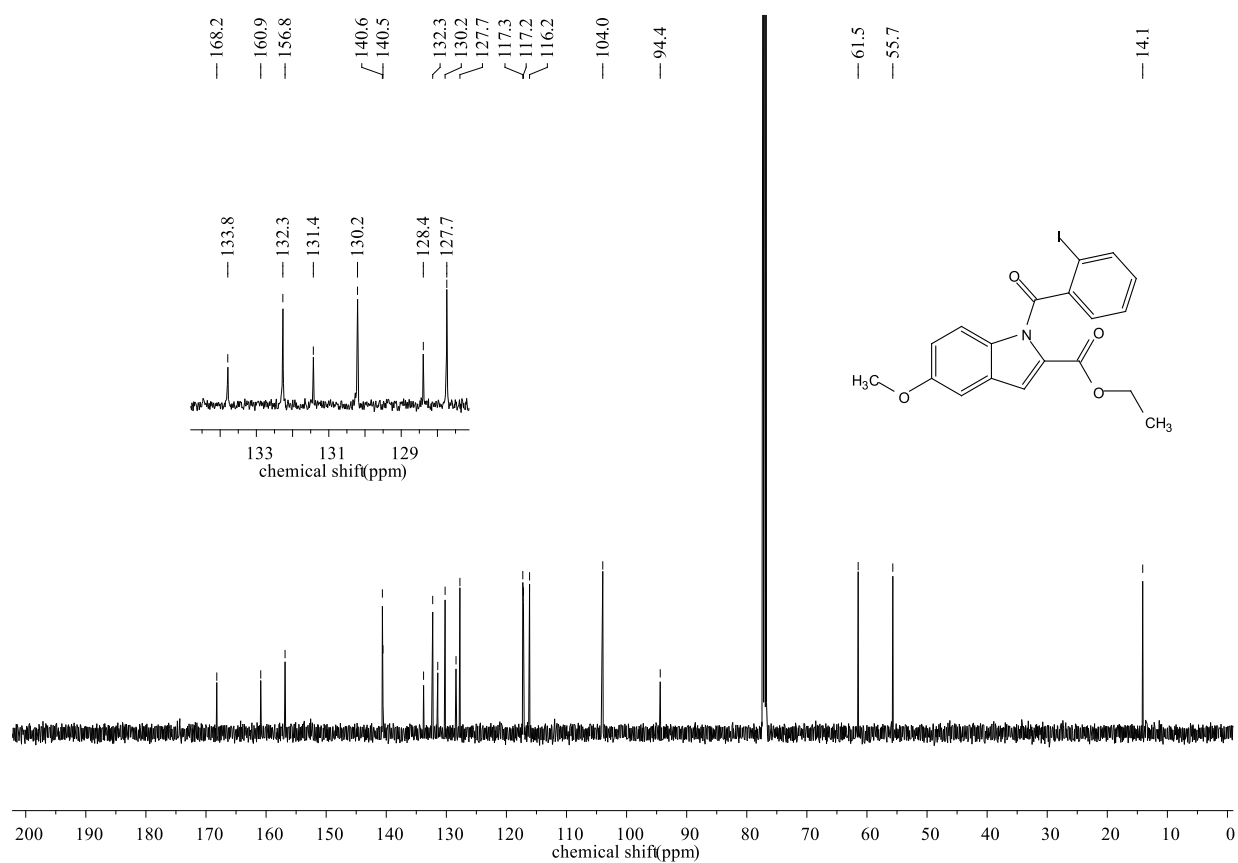

<sup>1</sup>H NMR Spectra of compound **R5a** (500 MHz, CDCl<sub>3</sub>)

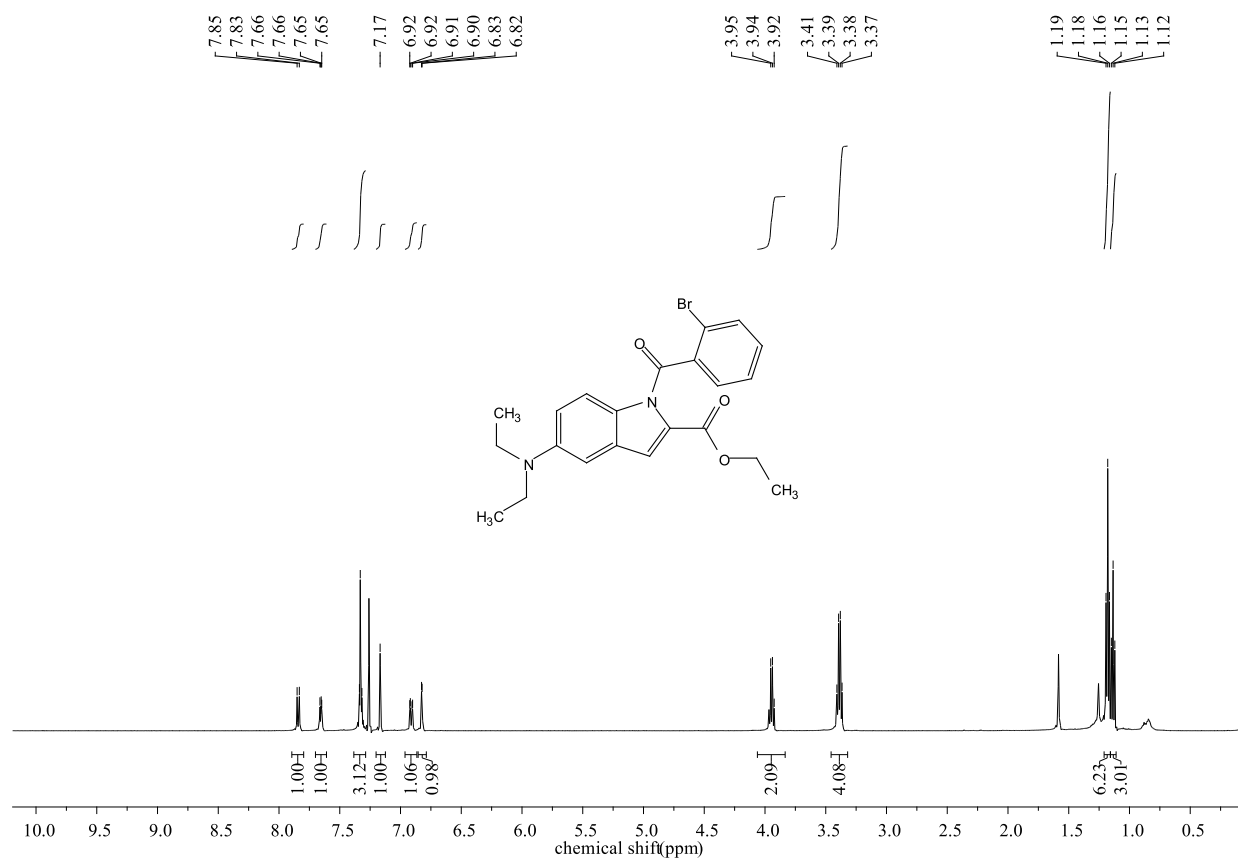

<sup>13</sup>C NMR Spectra of compound **R5a** (125 MHz, CDCl<sub>3</sub>)

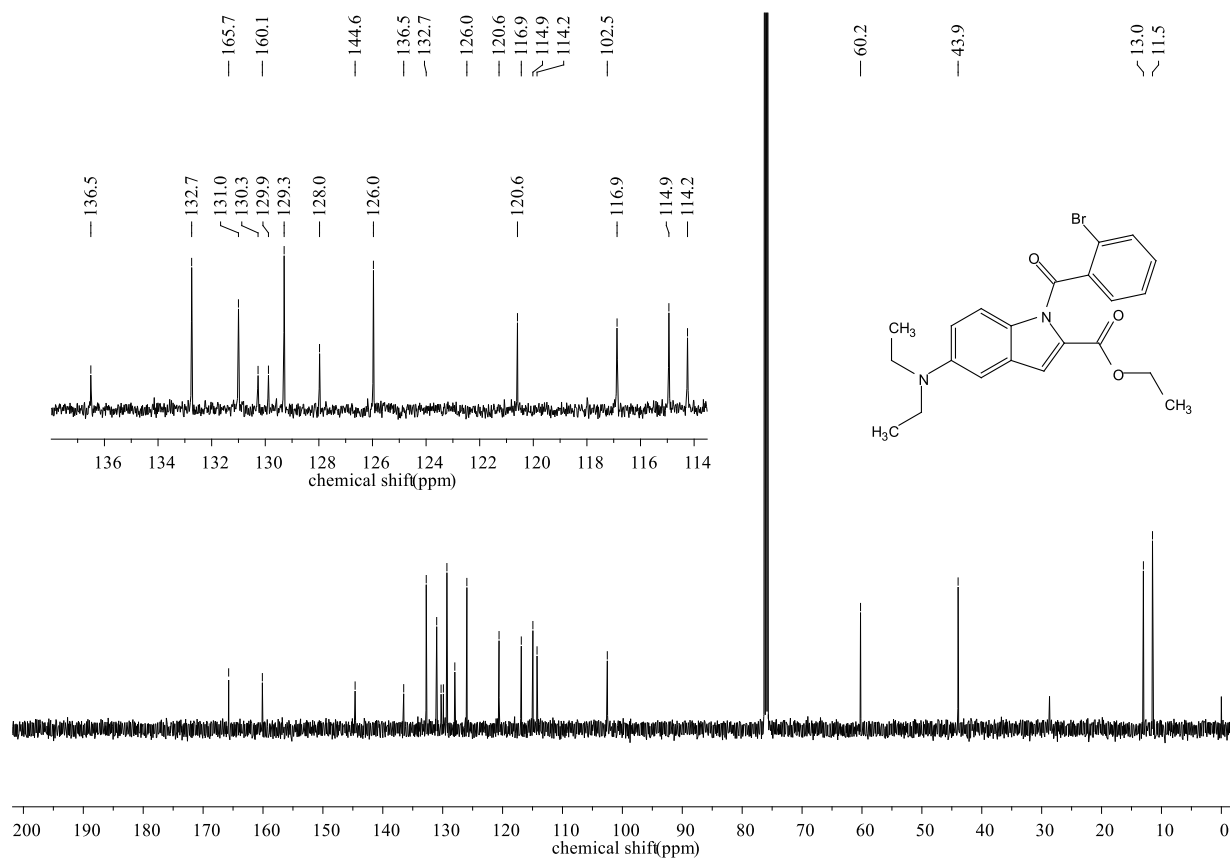

<sup>1</sup>H NMR Spectra of compound **R5b** (500 MHz, CDCl<sub>3</sub>)

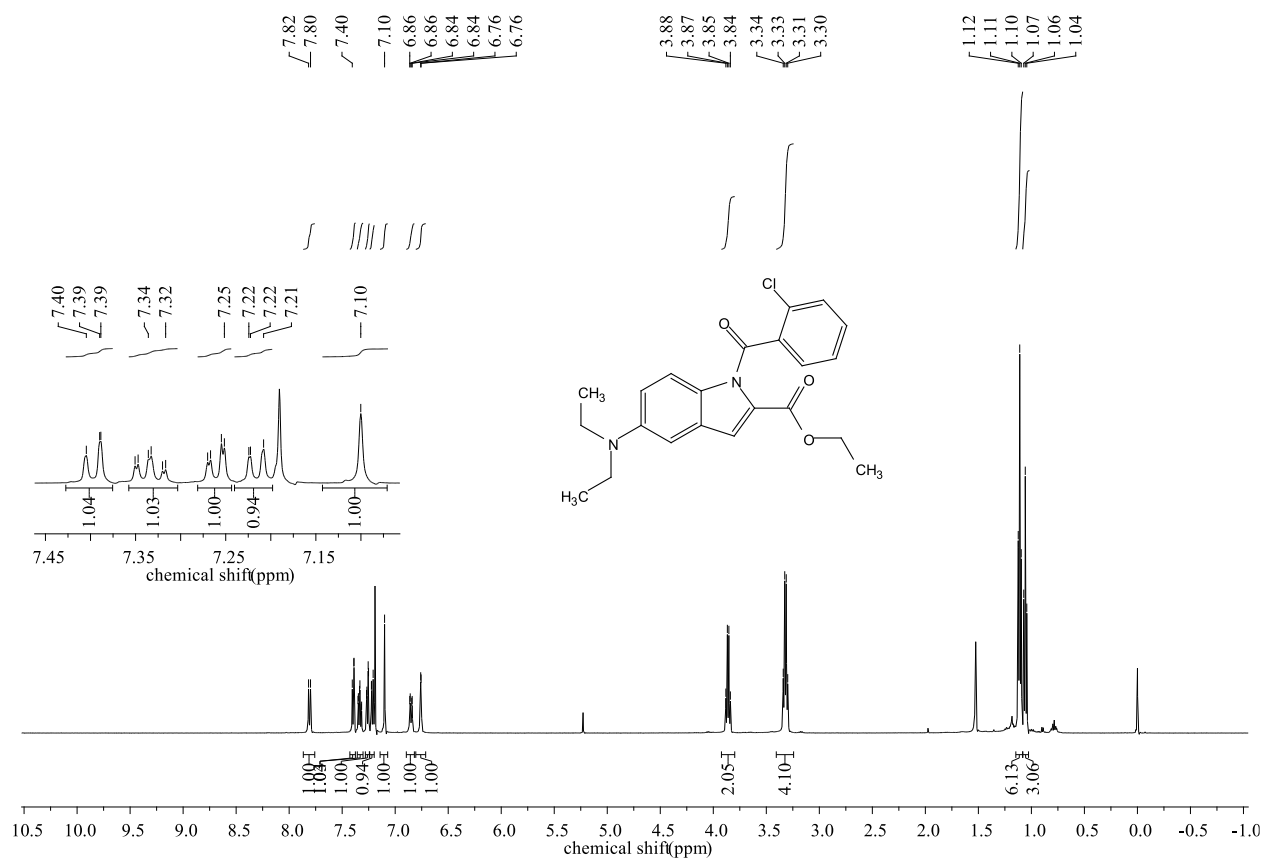

<sup>13</sup>C NMR Spectra of compound **R5b** (125 MHz, CDCl<sub>3</sub>)

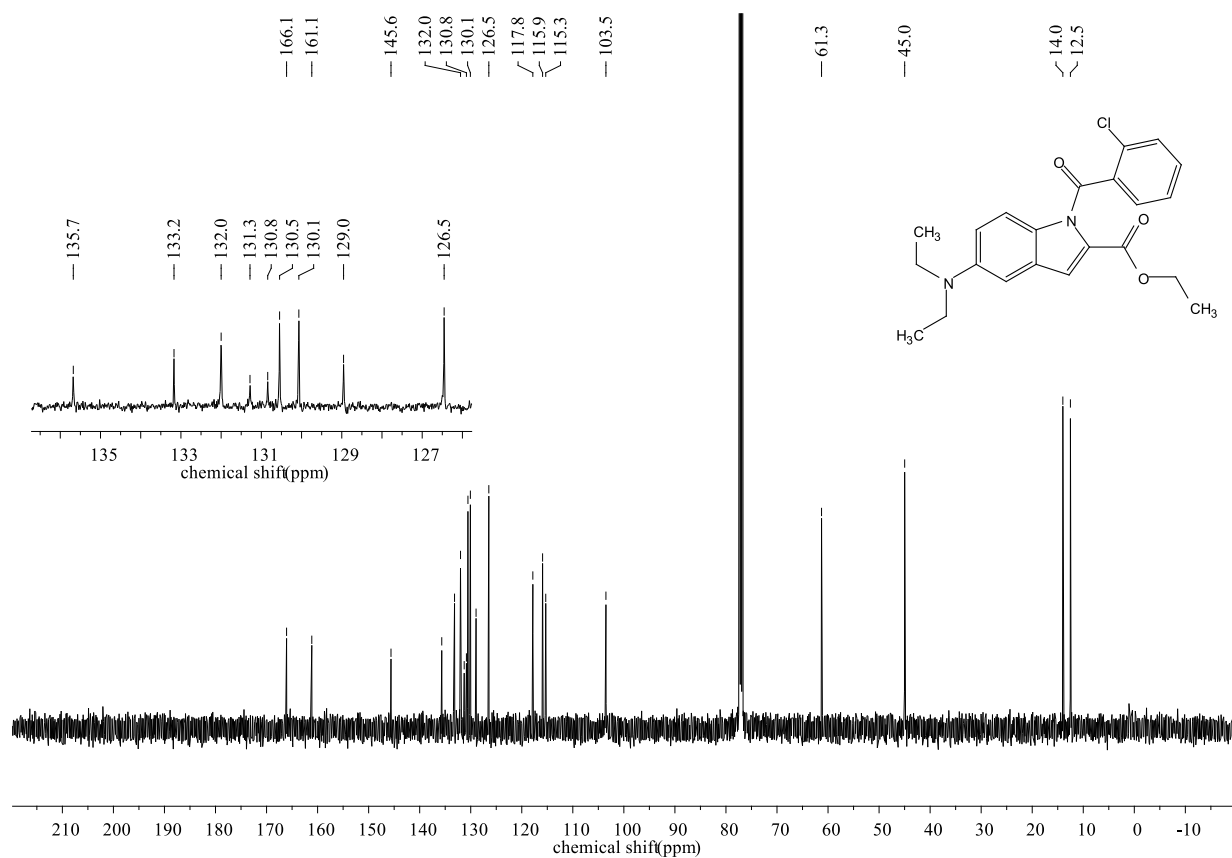

<sup>1</sup>H NMR Spectra of compound **R6a** (500 MHz, CDCl<sub>3</sub>)

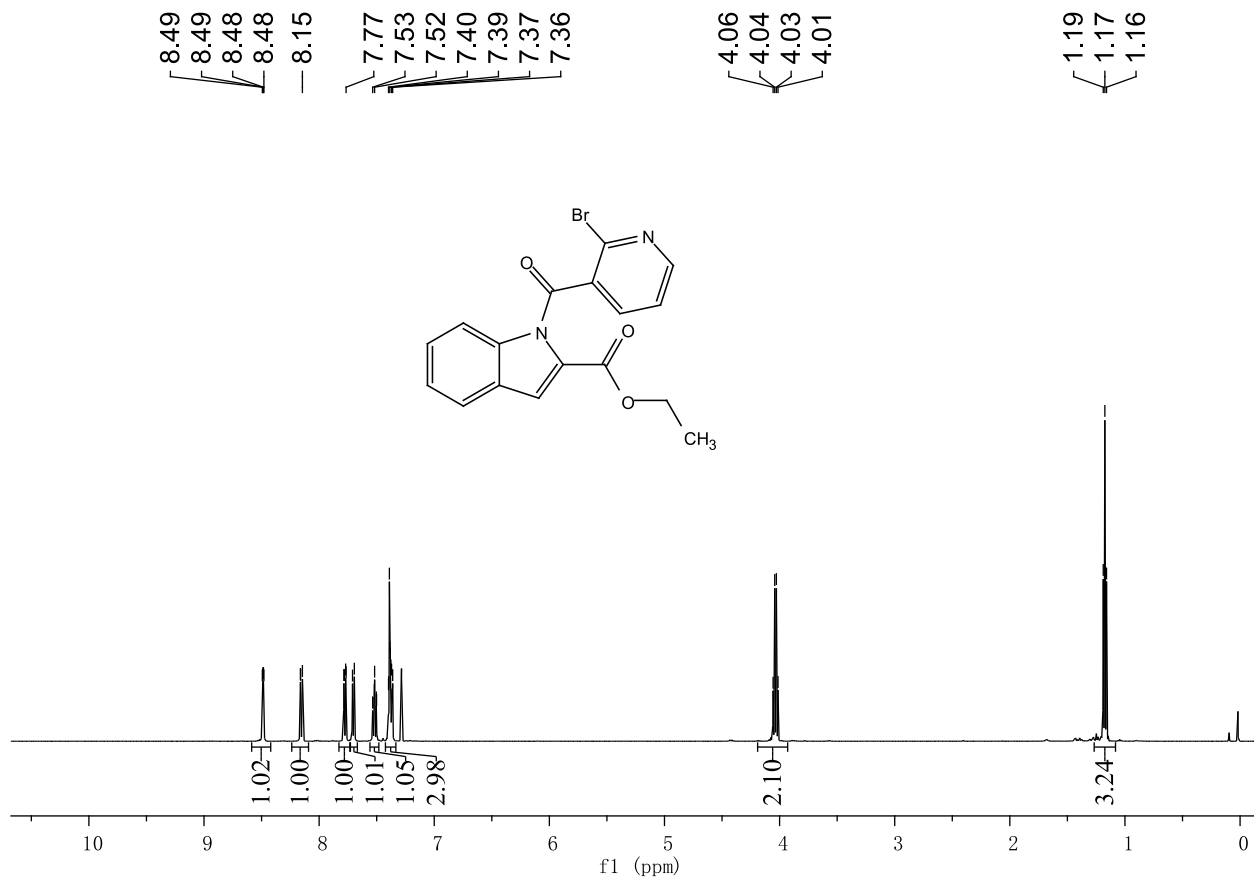

<sup>13</sup>C NMR Spectra of compound **R6a** (125 MHz, CDCl<sub>3</sub>)

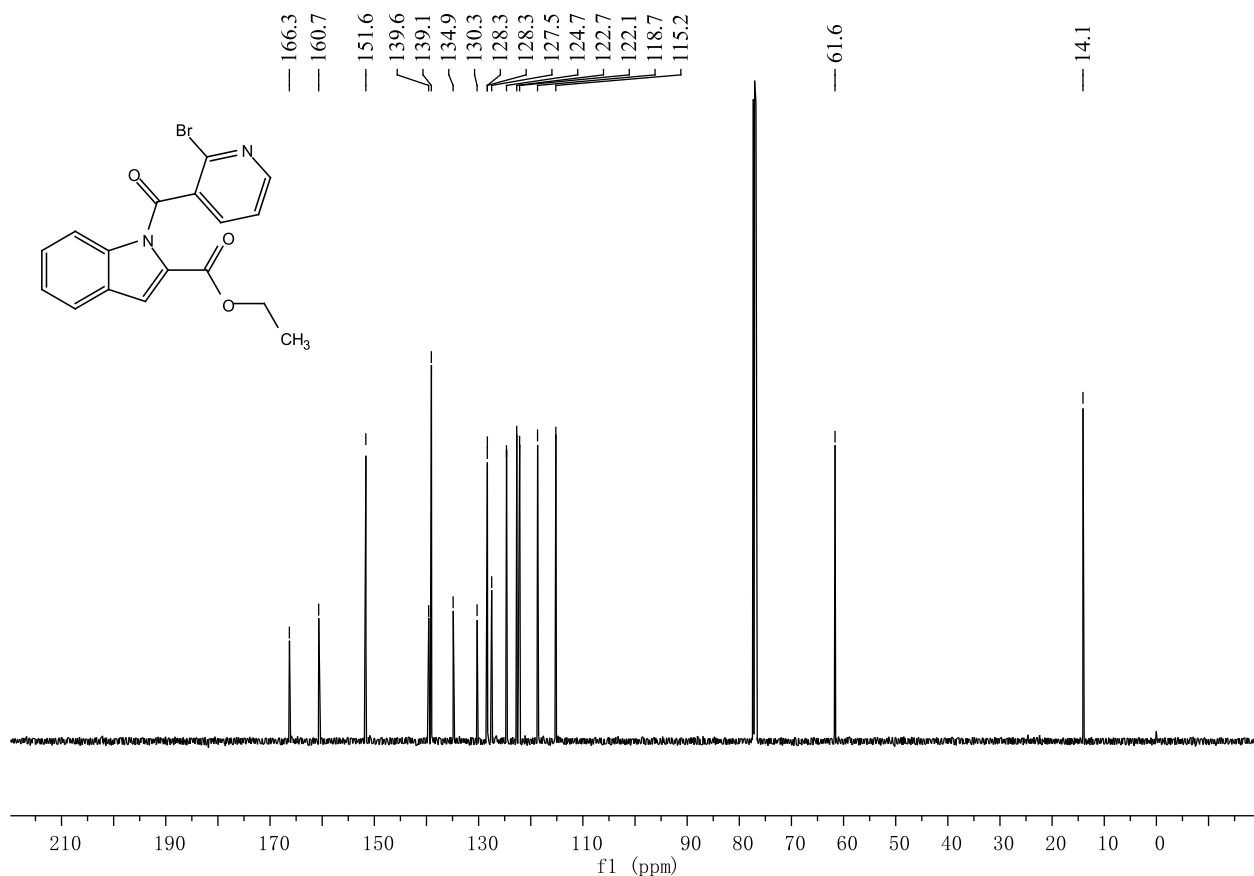

<sup>1</sup>H NMR Spectra of compound **R6b** (400 MHz, CDCl<sub>3</sub>)

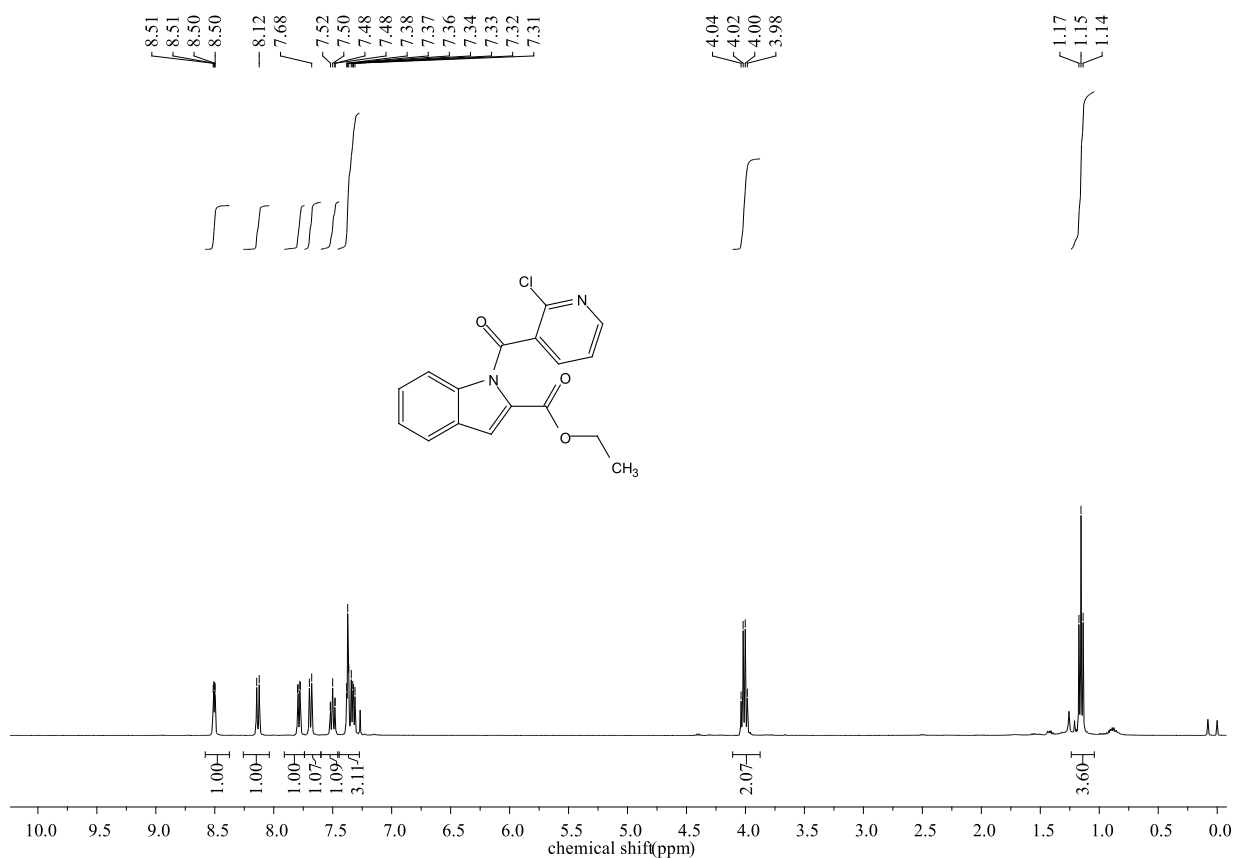

<sup>13</sup>C NMR Spectra of compound **R6b** (100 MHz, CDCl<sub>3</sub>)

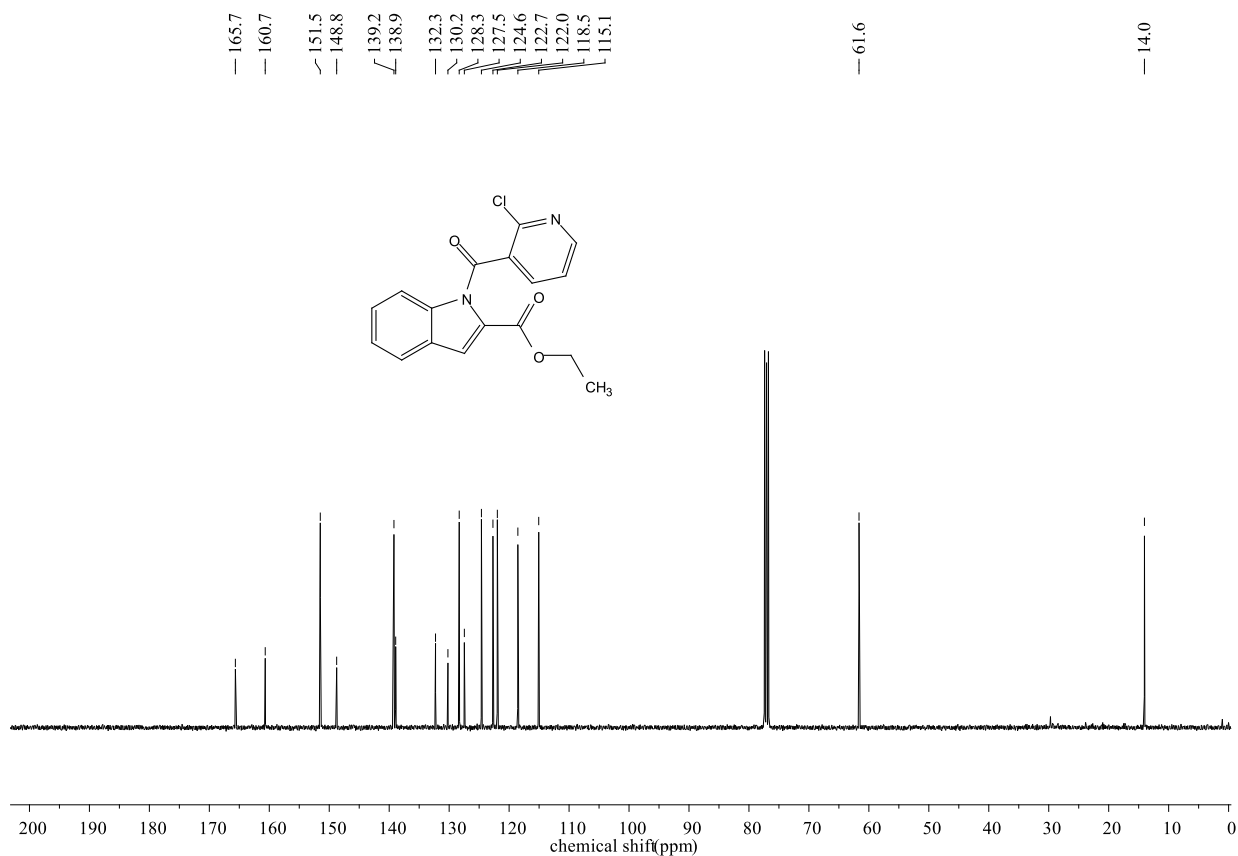

<sup>1</sup>H NMR Spectra of compound **R7** (400 MHz, CDCl<sub>3</sub>)

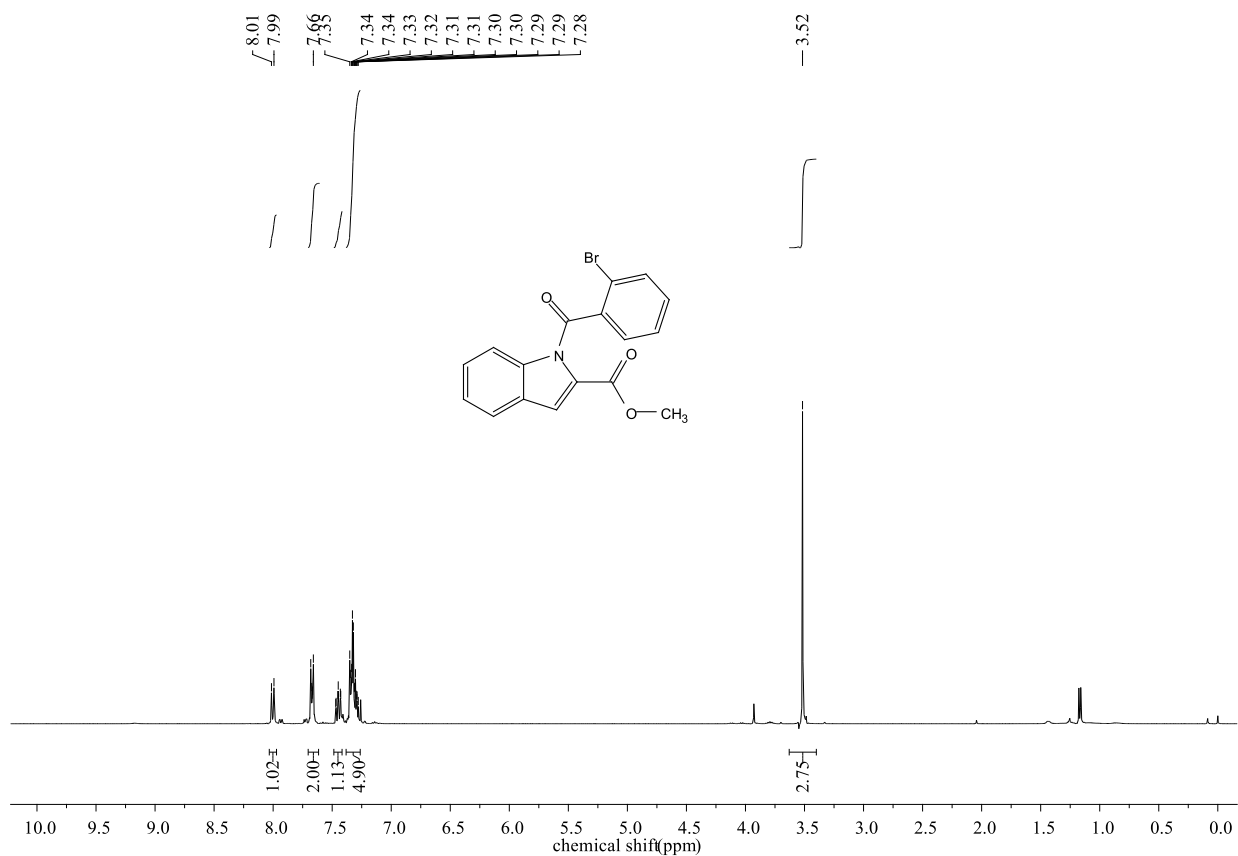

<sup>1</sup>H NMR Spectra of compound **R8** (400 MHz, CDCl<sub>3</sub>)

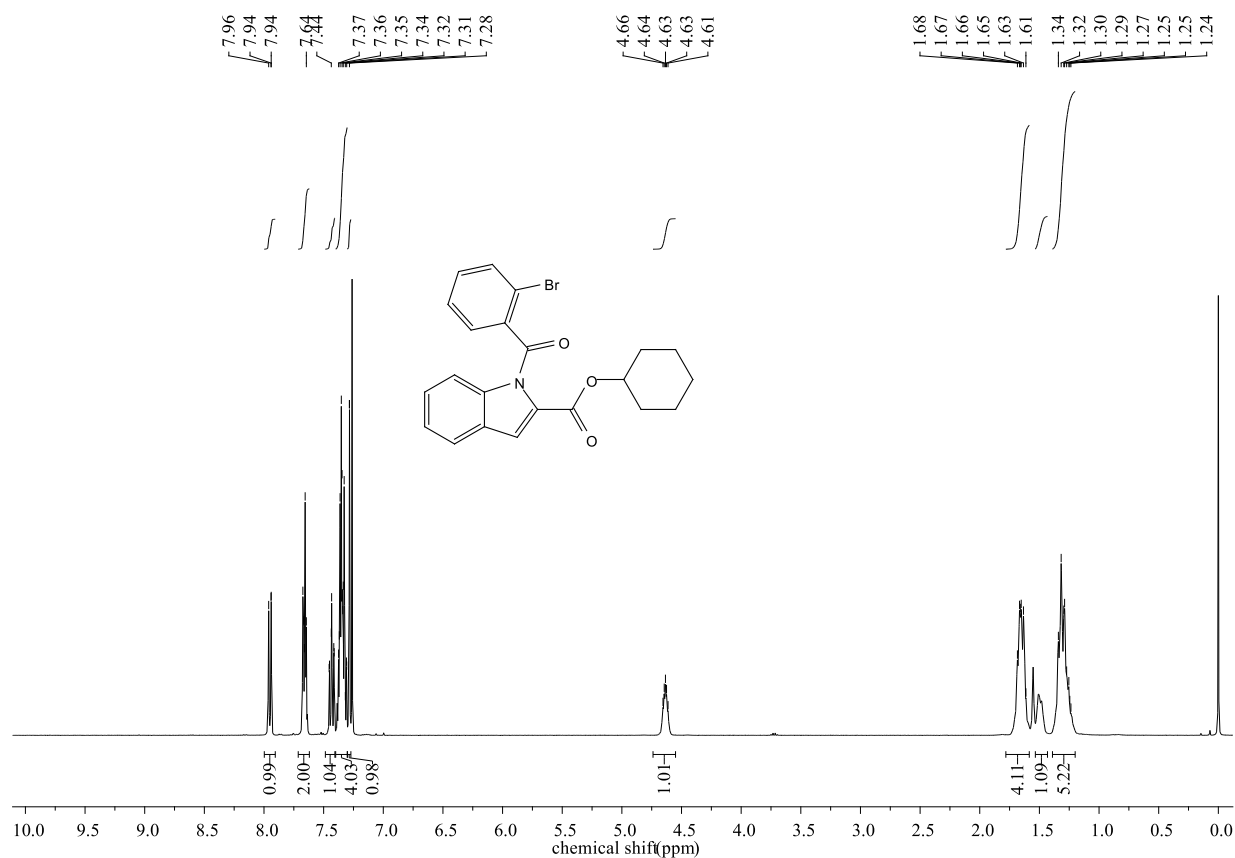

<sup>13</sup>C NMR Spectra of compound **R8** (125 MHz, CDCl<sub>3</sub>)

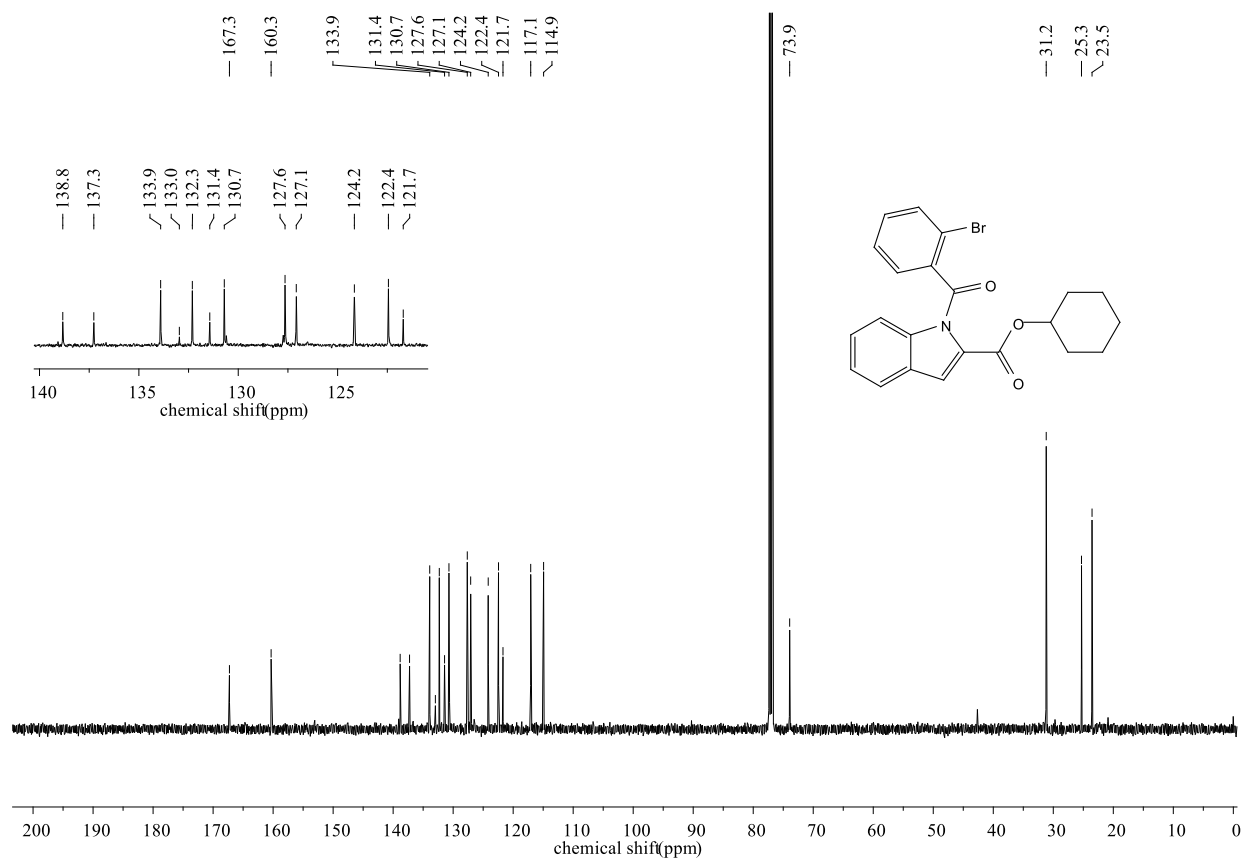

<sup>1</sup>H NMR Spectra of compound **R9** (400 MHz, CDCl<sub>3</sub>)

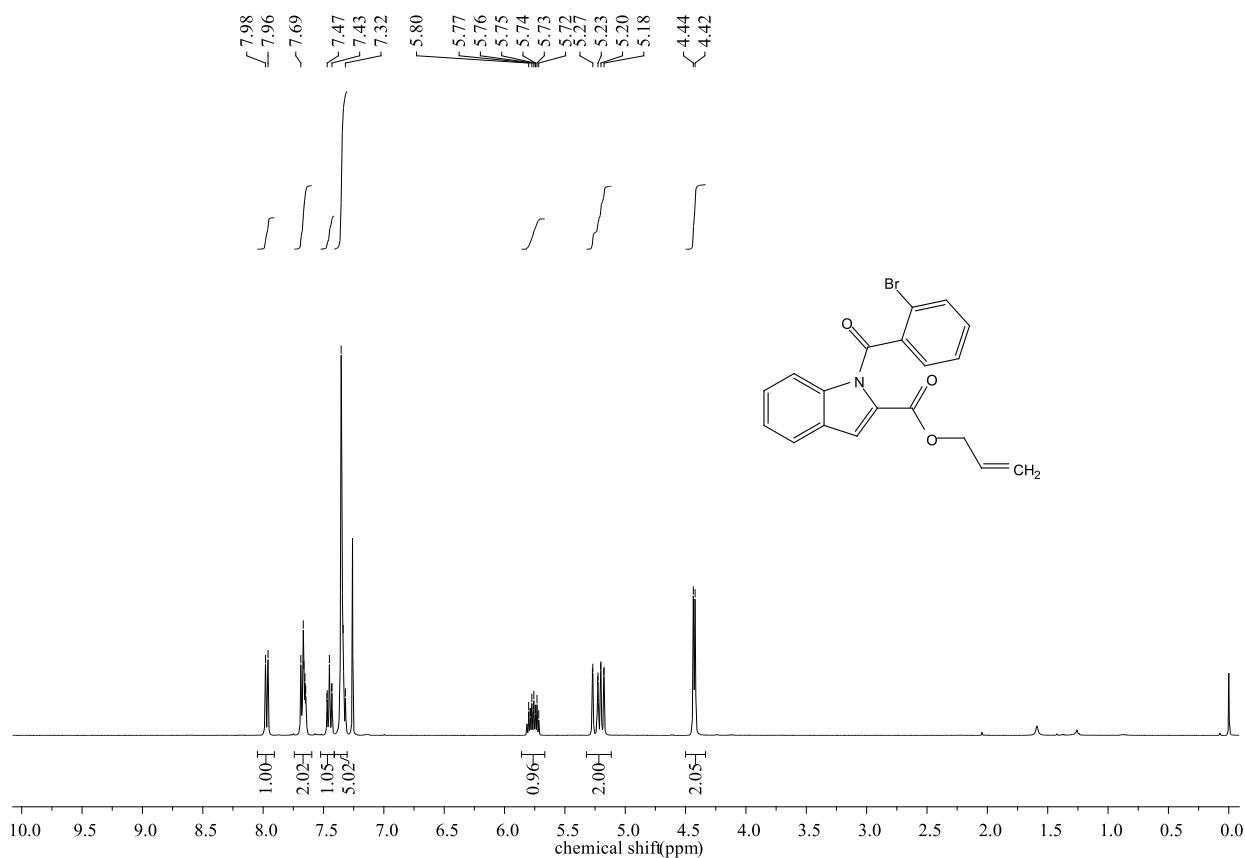

<sup>13</sup>C NMR Spectra of compound **R9** (125 MHz, CDCl<sub>3</sub>)

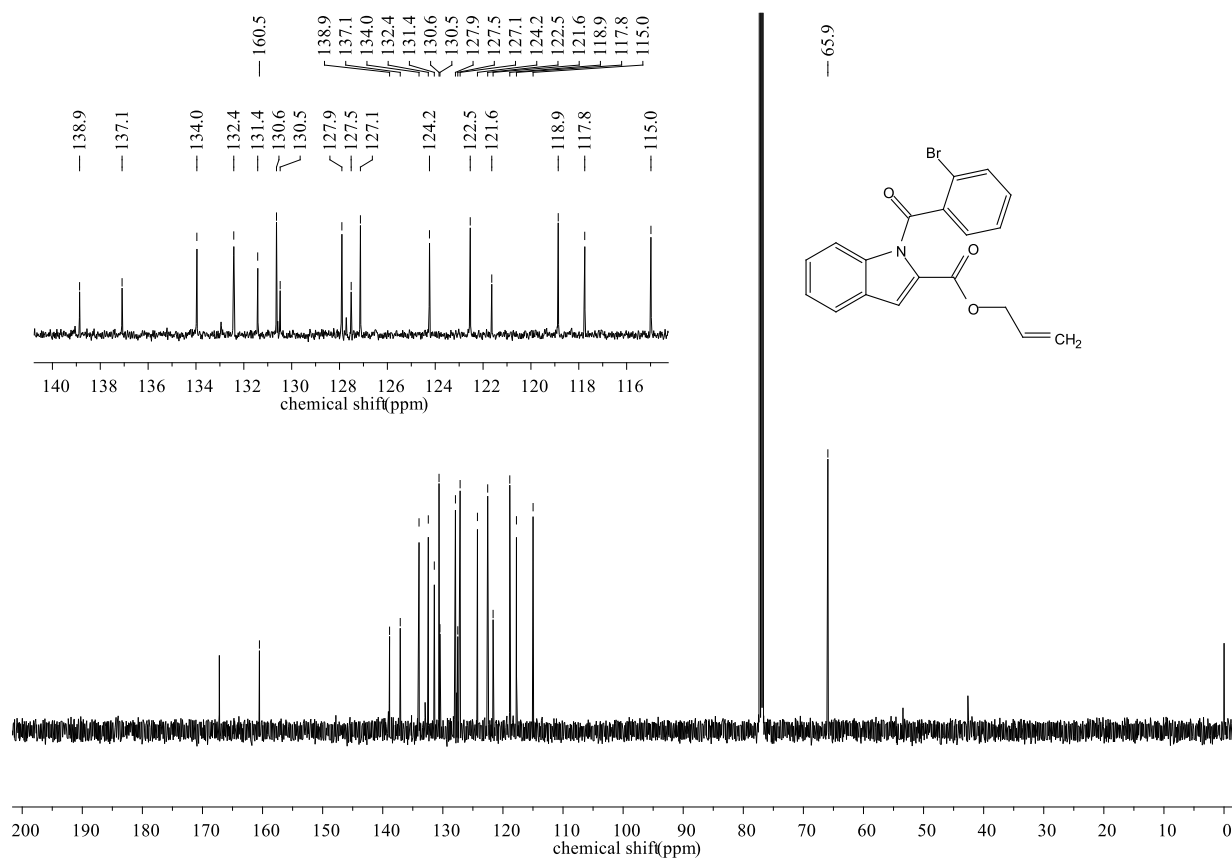

<sup>1</sup>H NMR Spectra of compound **R10** (400 MHz, CDCl<sub>3</sub>)

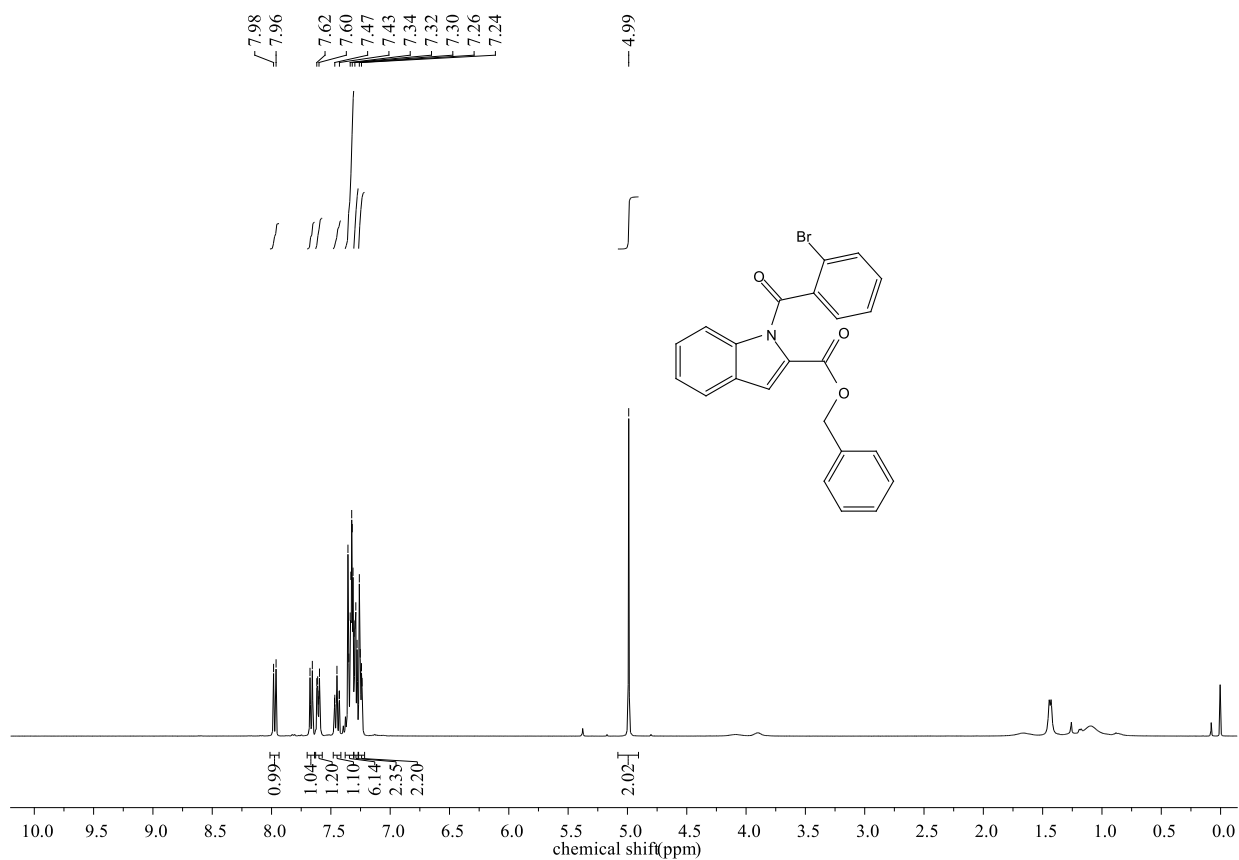

<sup>13</sup>C NMR Spectra of compound **R10** (100 MHz, CDCl<sub>3</sub>)

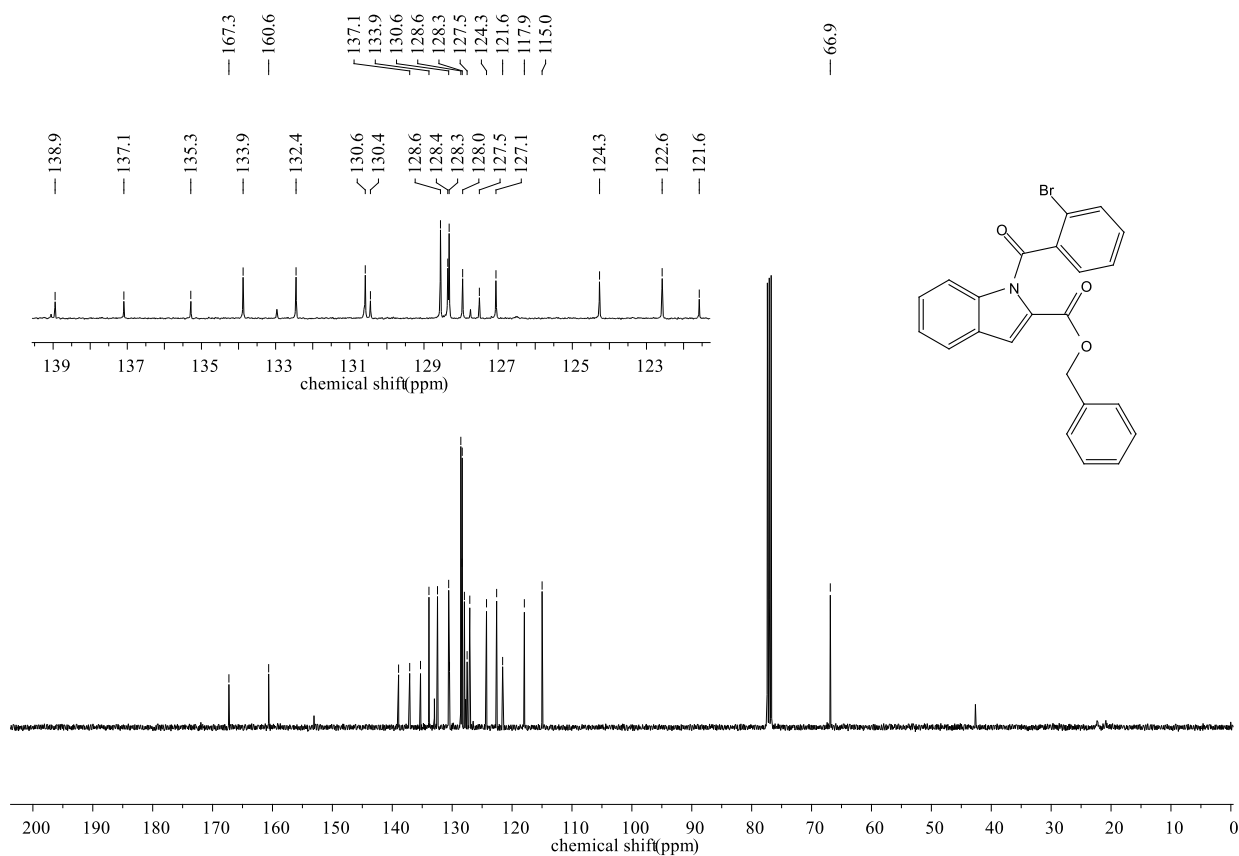

<sup>1</sup>H NMR Spectra of compound **R11** (400 MHz, CDCl<sub>3</sub>)

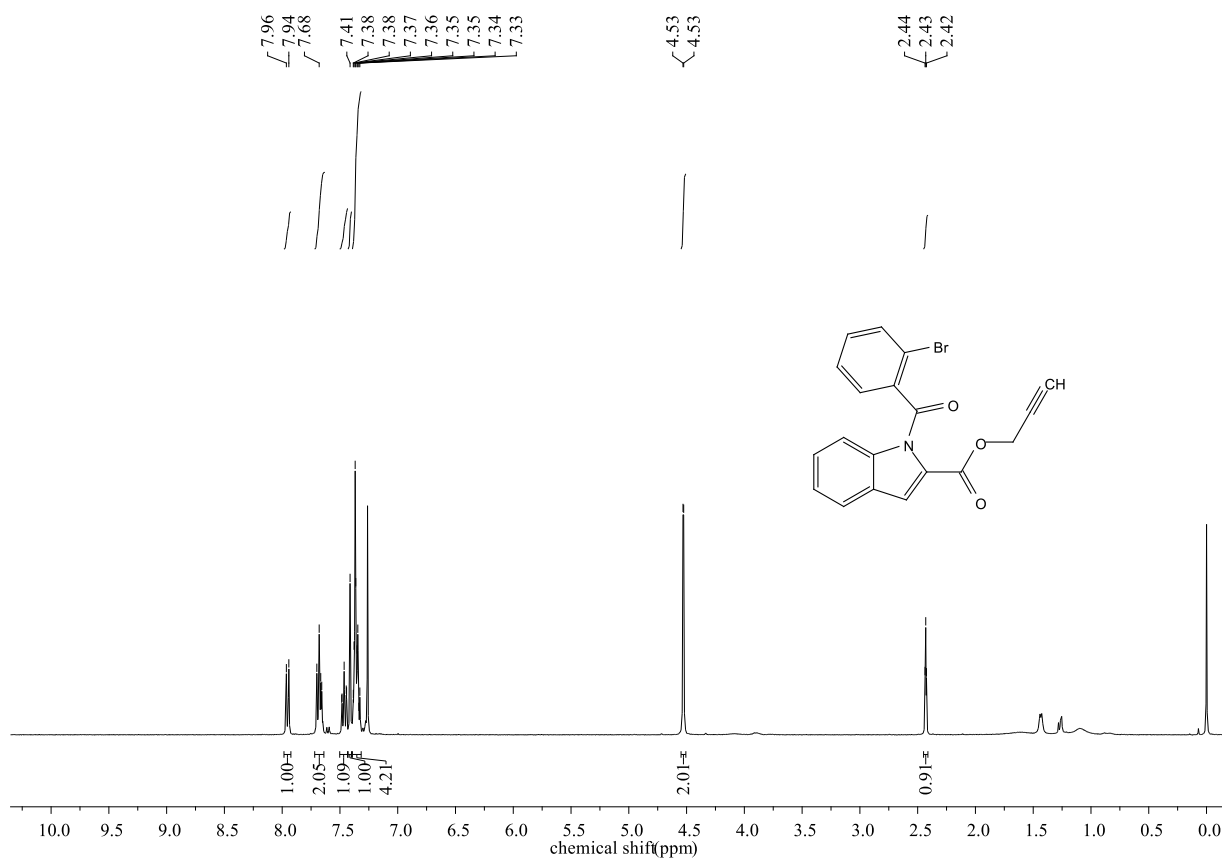

<sup>13</sup>C NMR Spectra of compound **R11** (100 MHz, CDCl<sub>3</sub>)

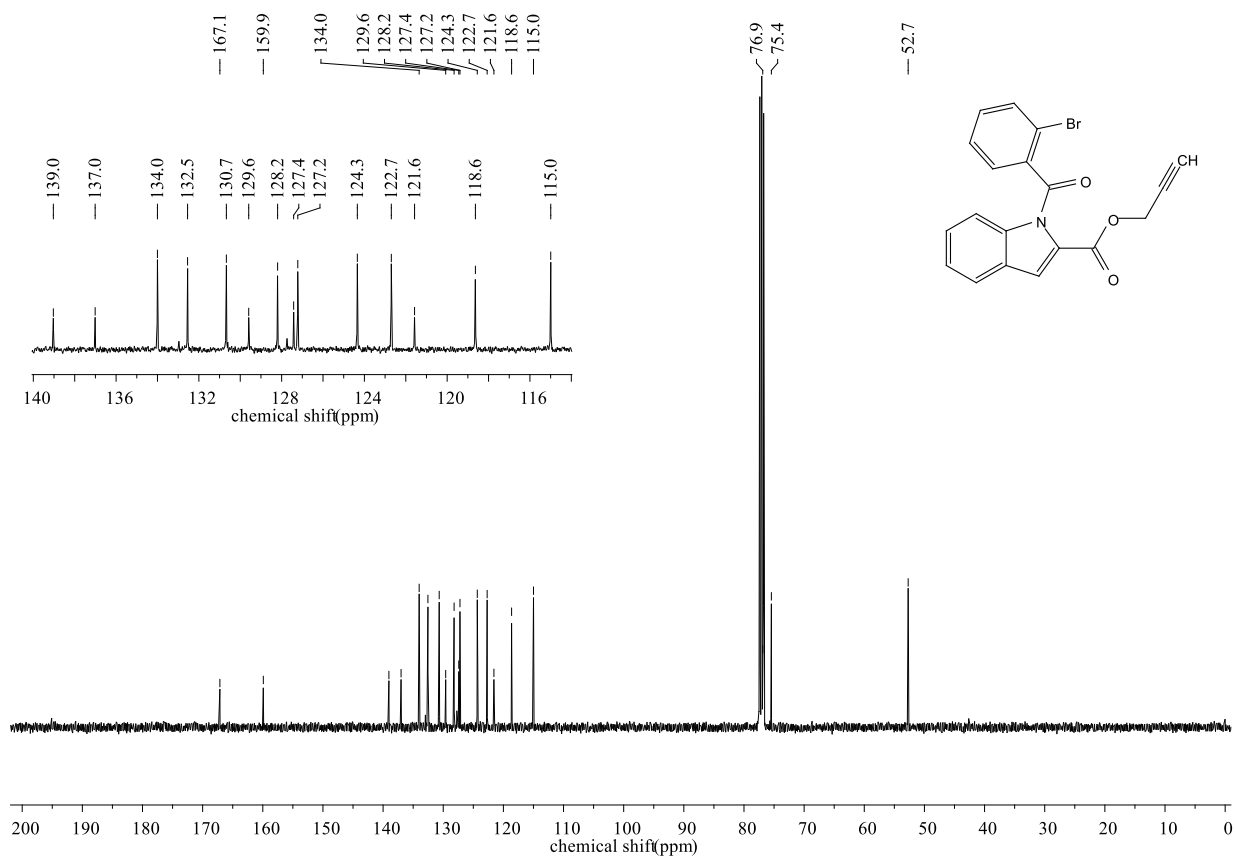

<sup>1</sup>H NMR Spectra of compound **R12** (400 MHz, CDCl<sub>3</sub>)

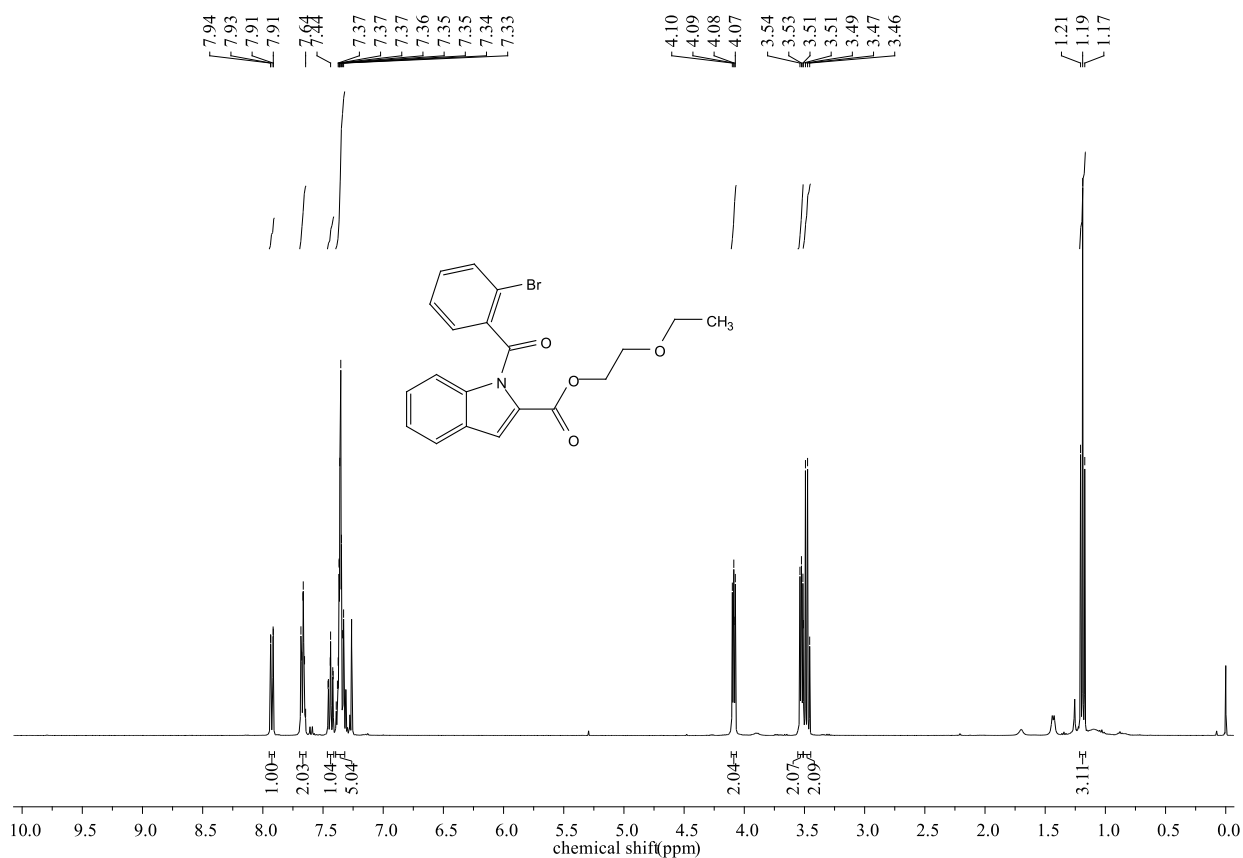

<sup>13</sup>C NMR Spectra of compound **R12** (125 MHz, CDCl<sub>3</sub>)

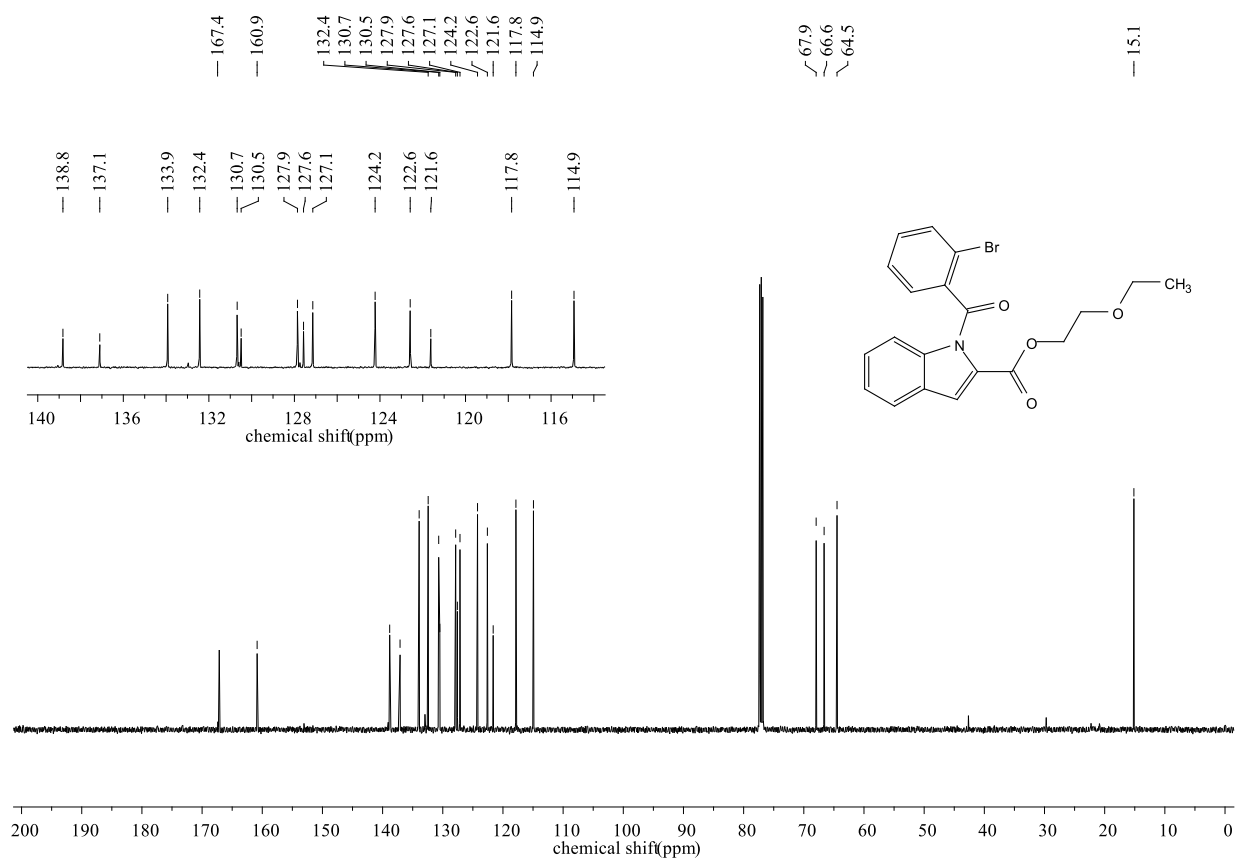

<sup>1</sup>H NMR Spectra of compound **R13** (400 MHz, CDCl<sub>3</sub>)

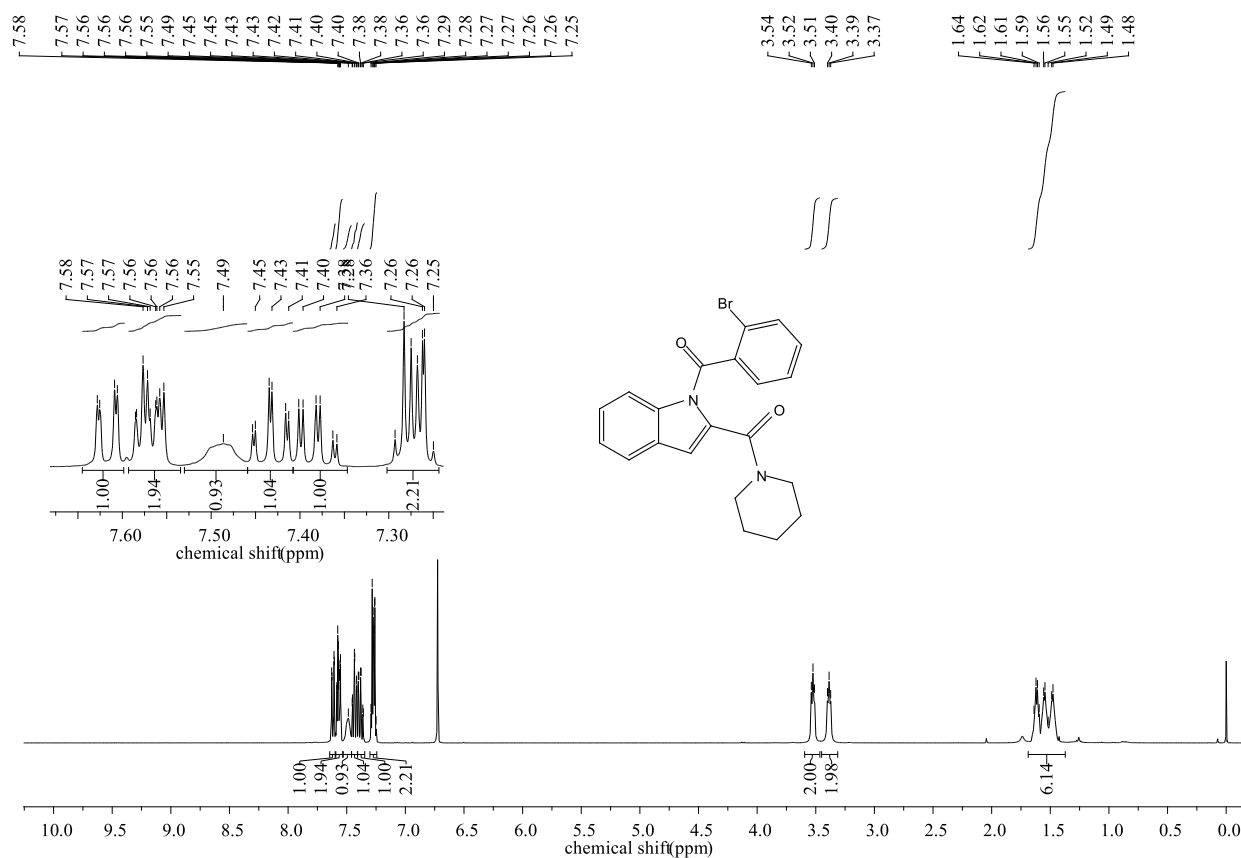

<sup>13</sup>C NMR Spectra of compound **R13** (100 MHz, CDCl<sub>3</sub>)

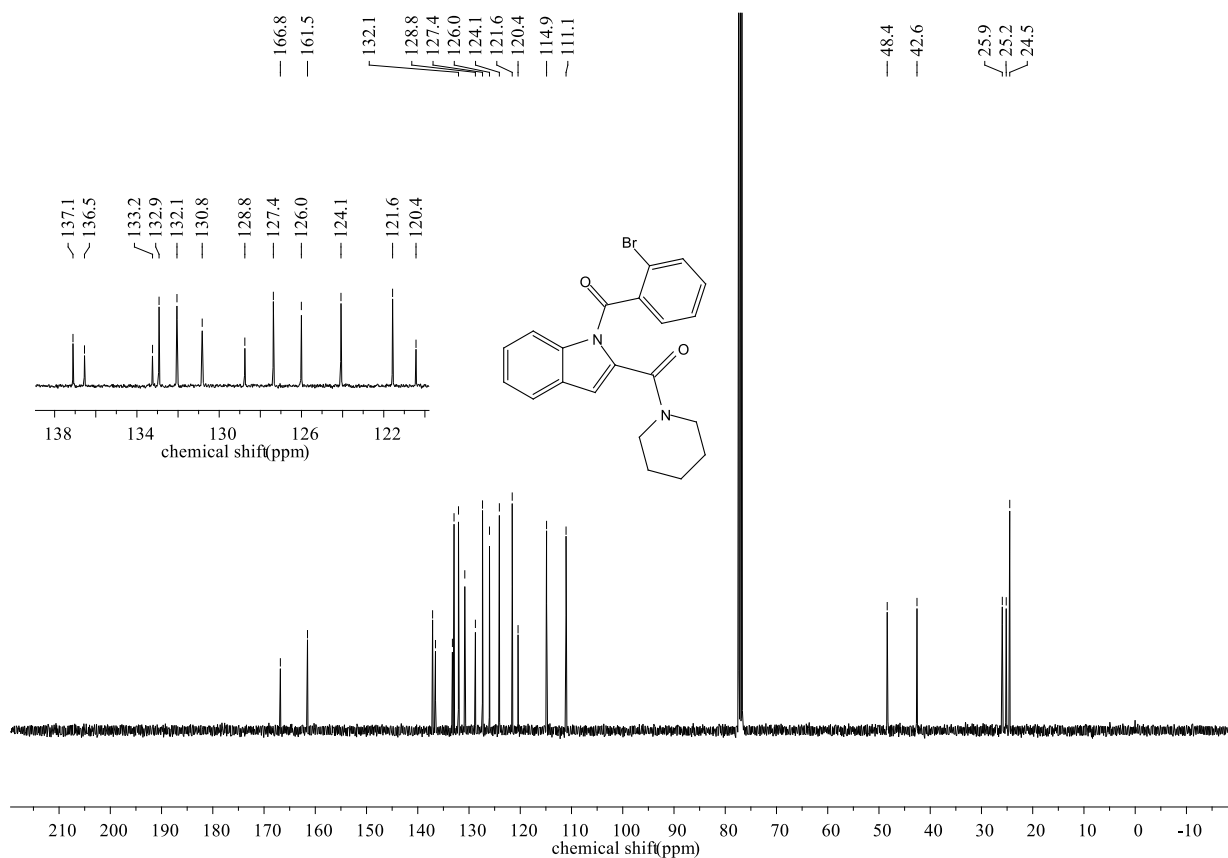

<sup>1</sup>H NMR Spectra of compound **R14** (500 MHz, CDCl<sub>3</sub>)

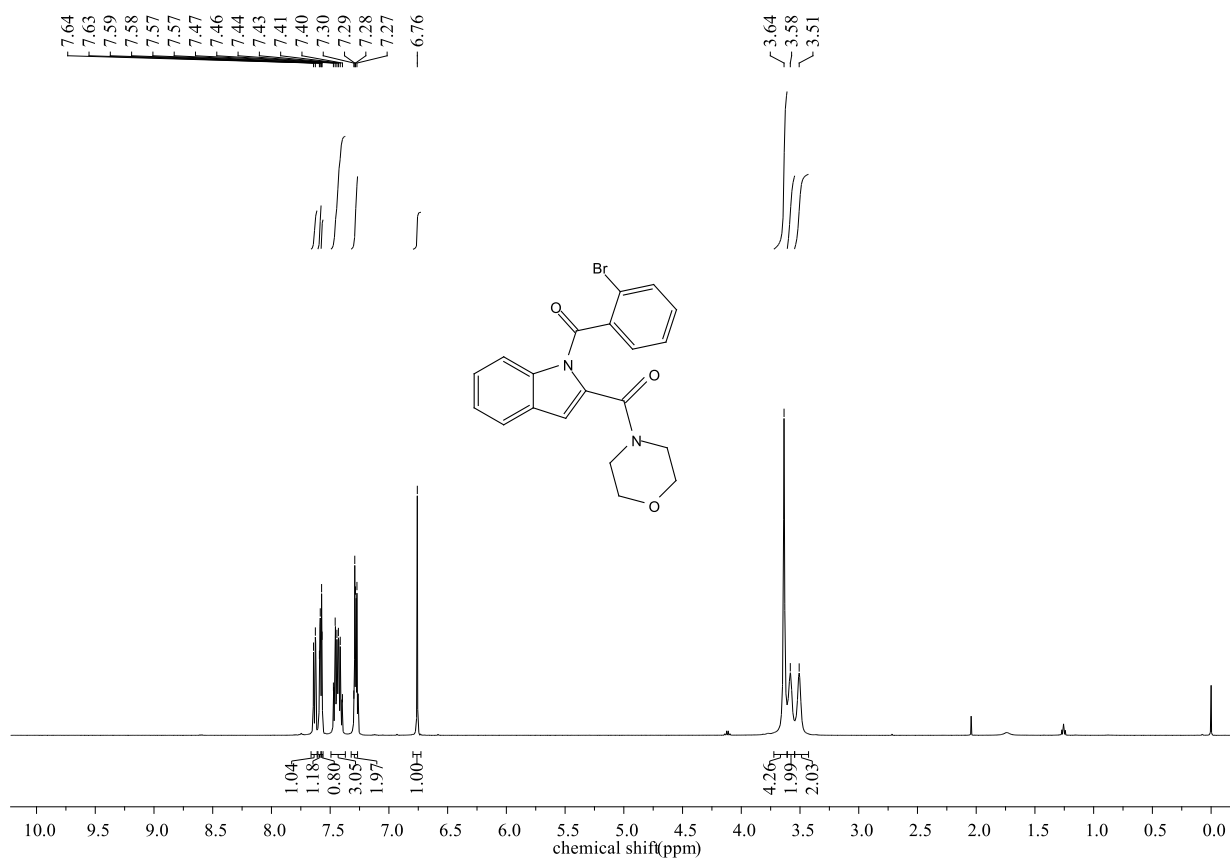

<sup>13</sup>C NMR Spectra of compound **R14** (125 MHz, CDCl<sub>3</sub>)

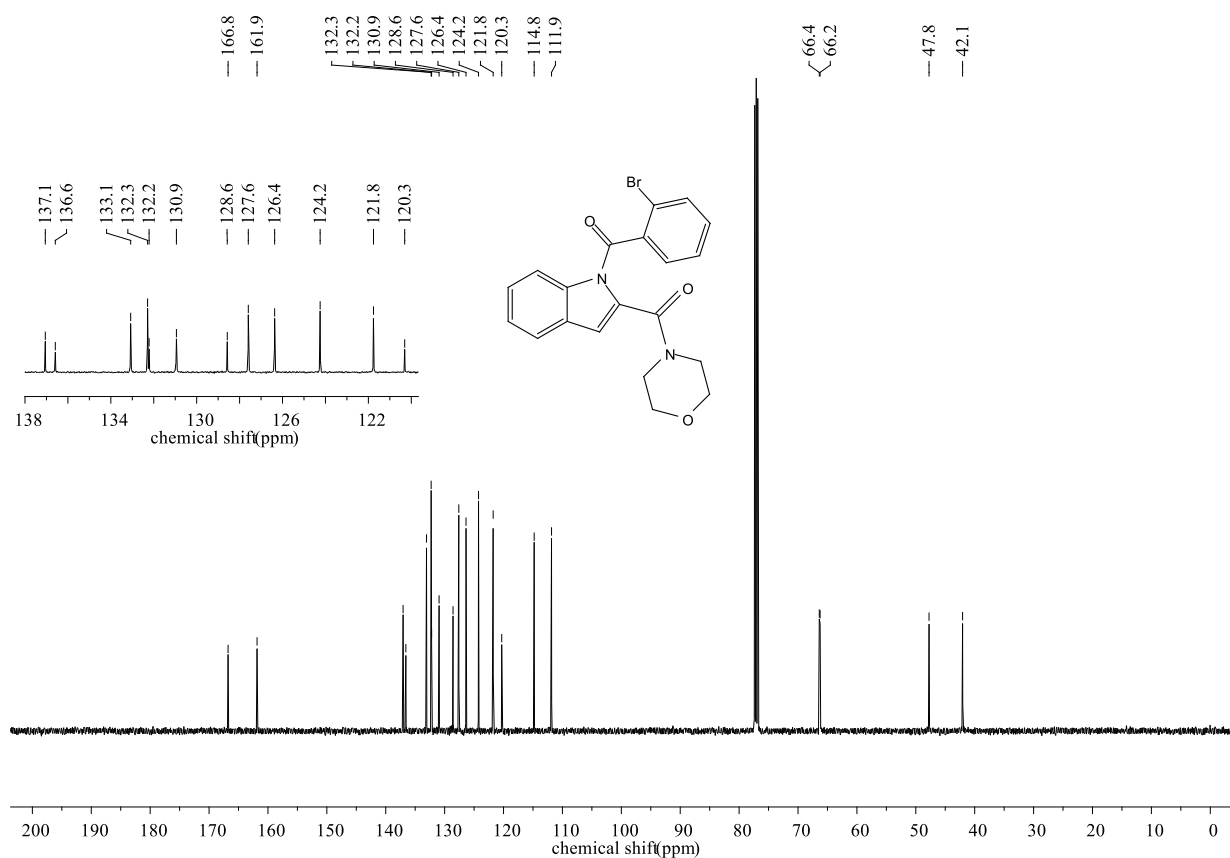

<sup>1</sup>H NMR Spectra of compound **R15** (400 MHz, CDCl<sub>3</sub>)

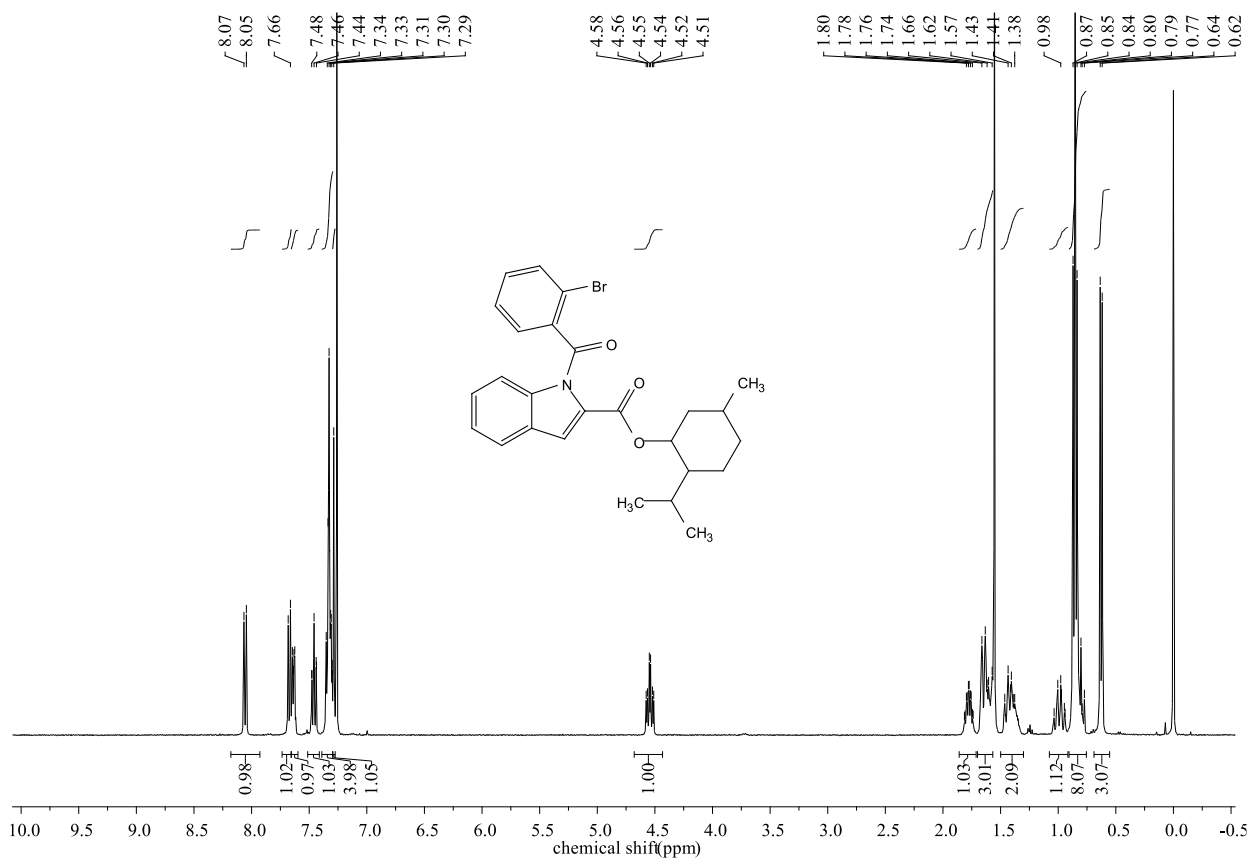

<sup>13</sup>C NMR Spectra of compound **R15** (125 MHz, CDCl<sub>3</sub>)

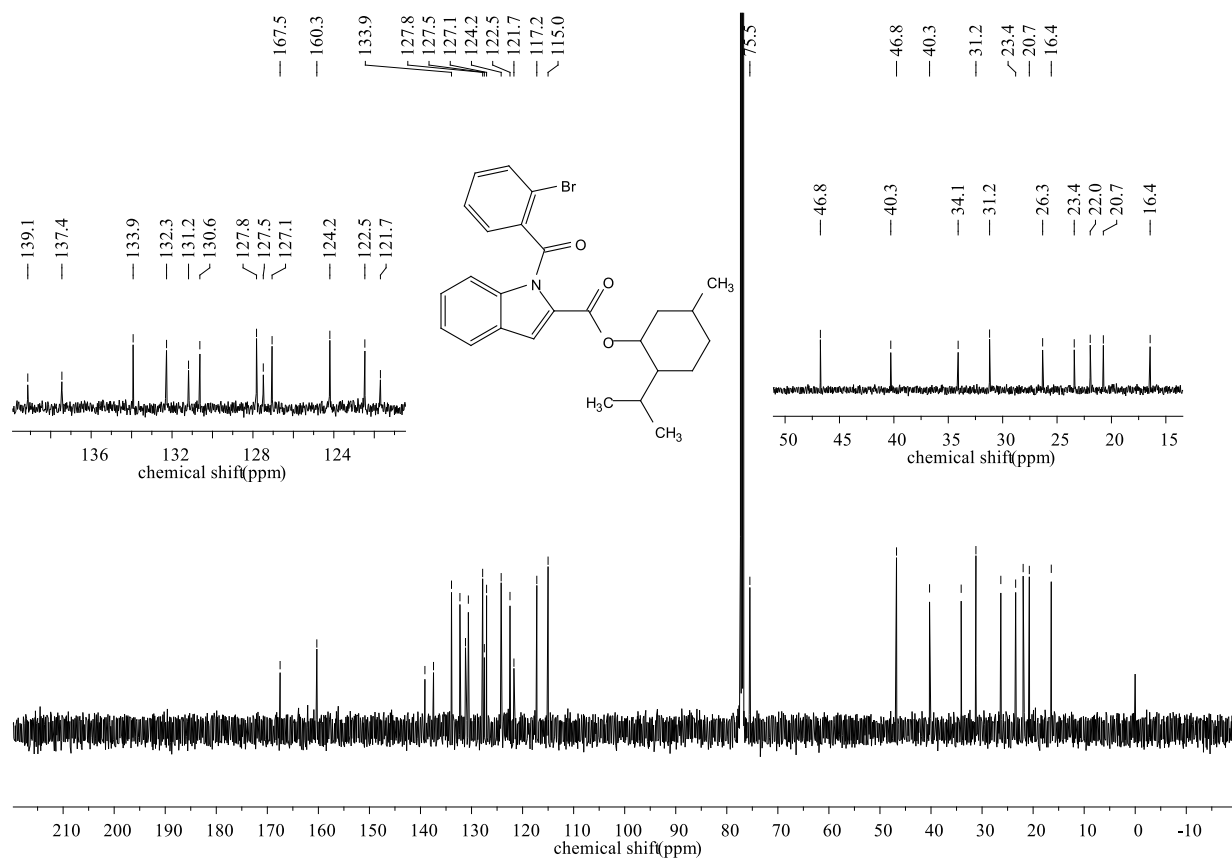

<sup>1</sup>H NMR Spectra of compound **R16** (400 MHz, CDCl<sub>3</sub>)

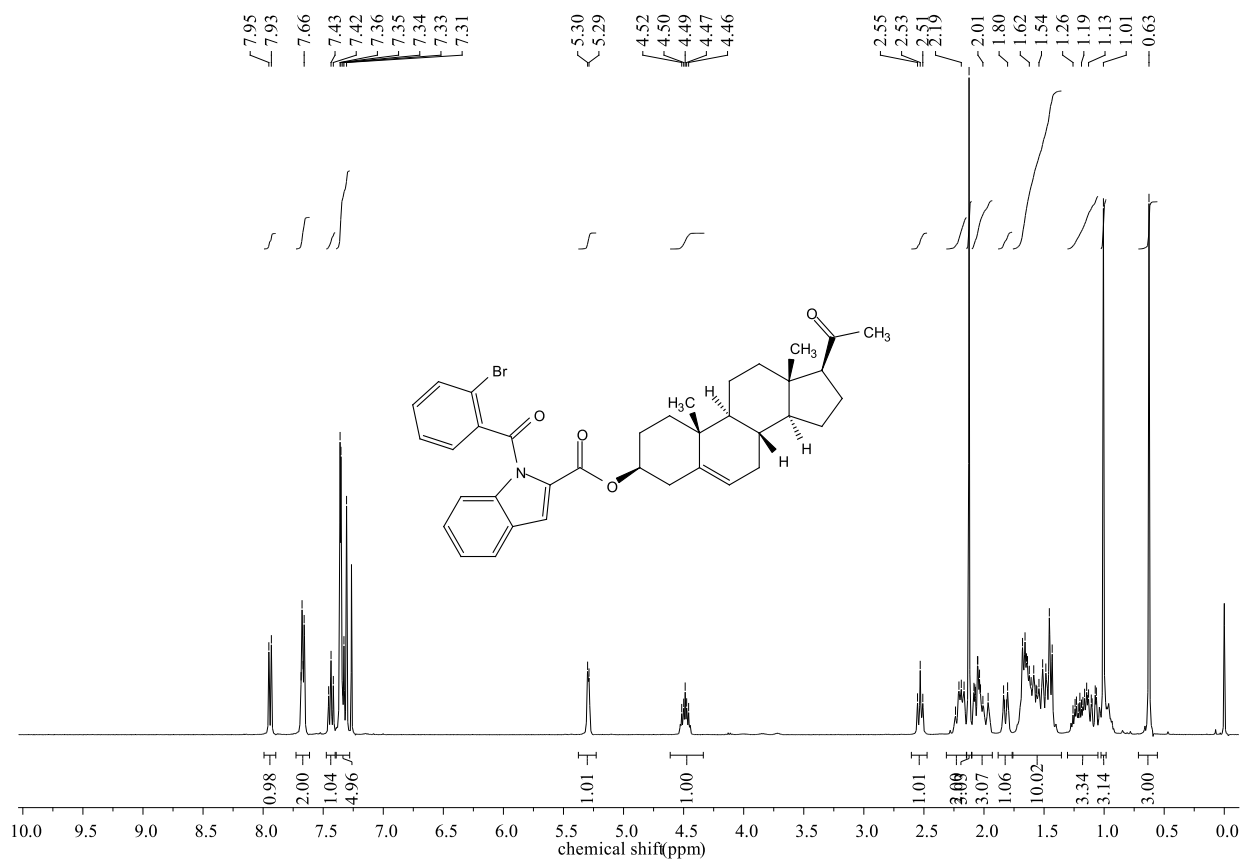

<sup>13</sup>C NMR Spectra of compound **R16** (125 MHz, CDCl<sub>3</sub>)

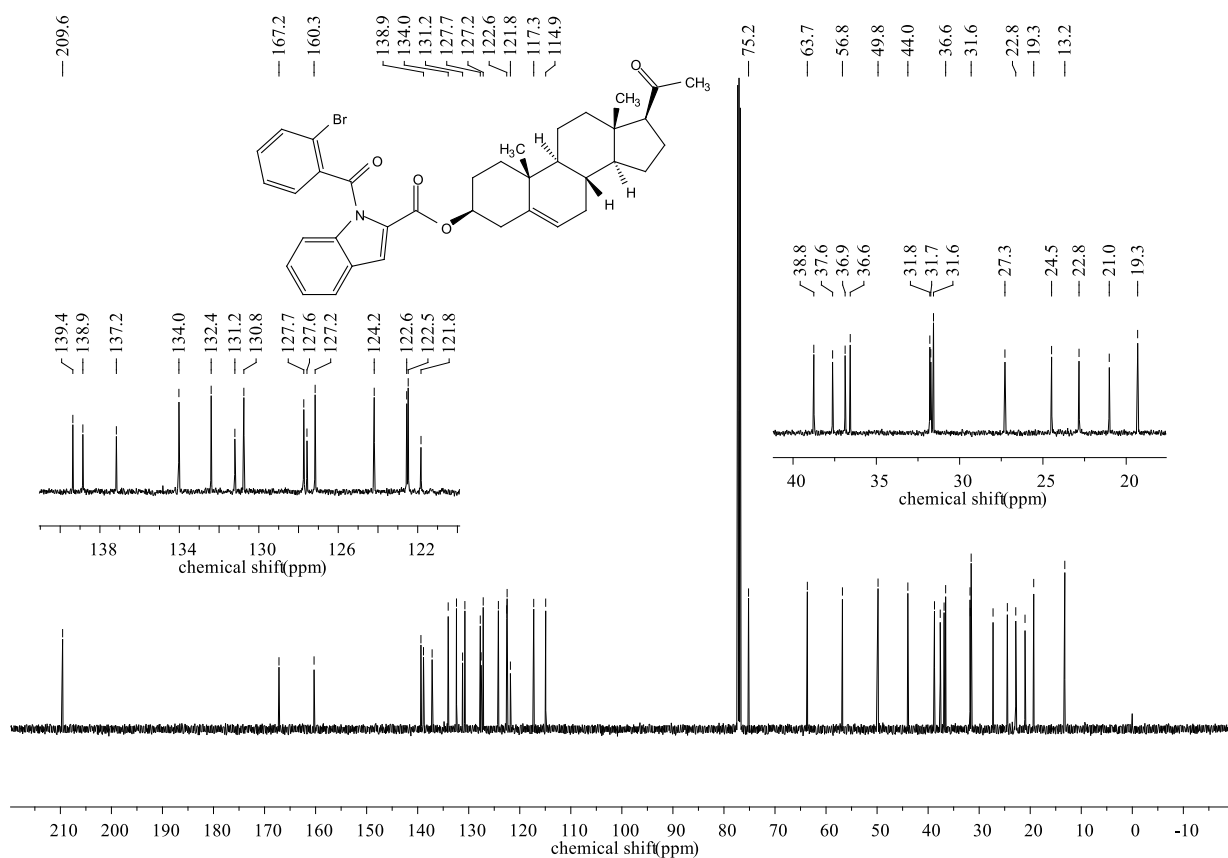

<sup>1</sup>H NMR Spectra of compound **R7** (500 MHz, CDCl<sub>3</sub>)

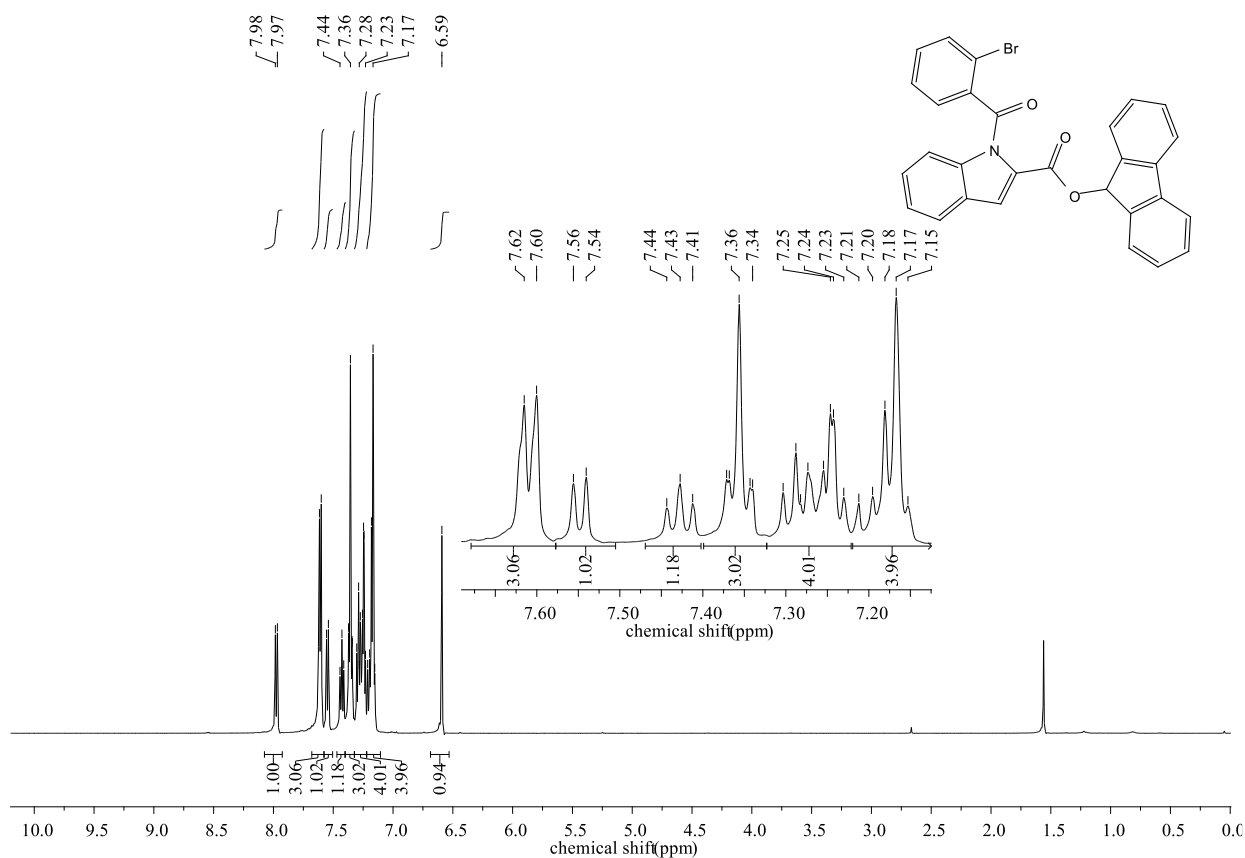

<sup>13</sup>C NMR Spectra of compound **R17** (125 MHz, CDCl<sub>3</sub>)

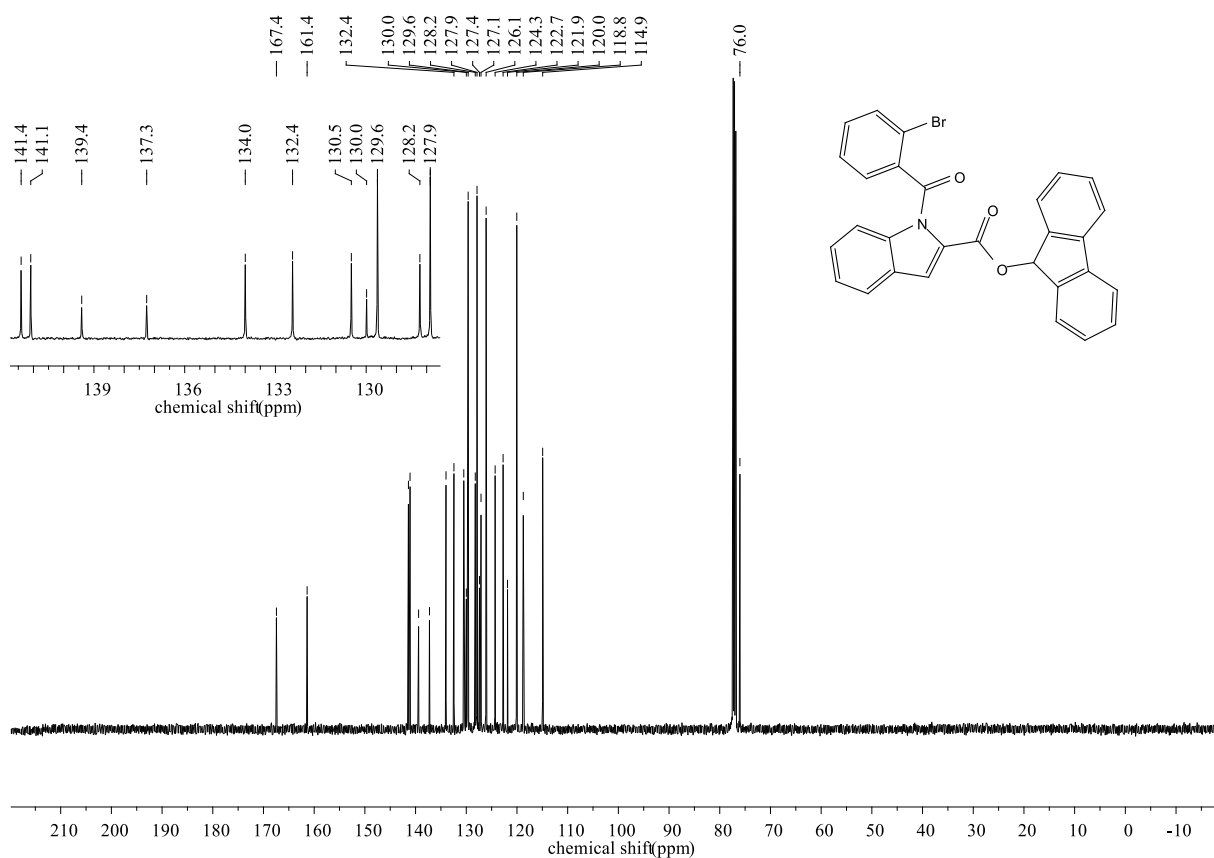

<sup>1</sup>H NMR Spectra of compound **R18** (500 MHz, CDCl<sub>3</sub>)

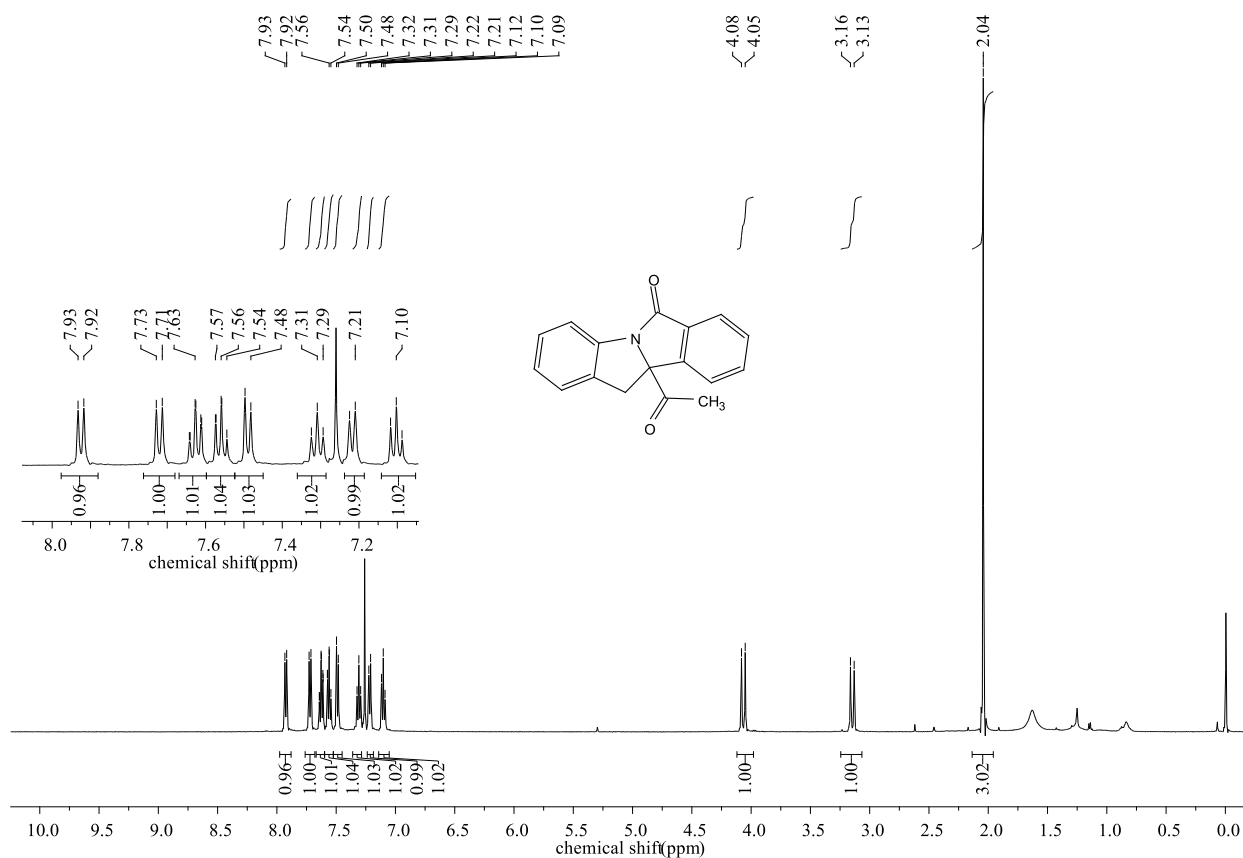

<sup>13</sup>C NMR Spectra of compound **R18** (125 MHz, CDCl<sub>3</sub>)

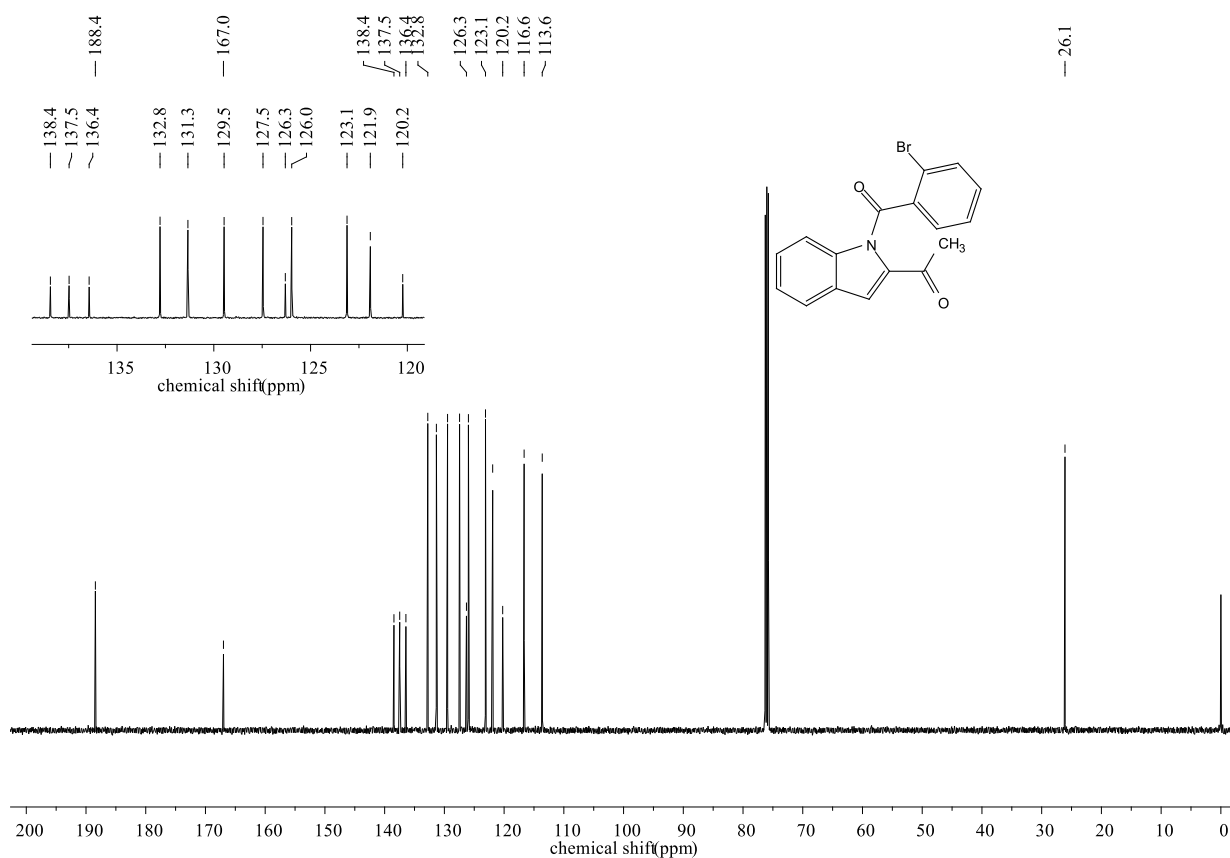

<sup>1</sup>H NMR Spectra of compound **R19** (400 MHz, CDCl<sub>3</sub>)

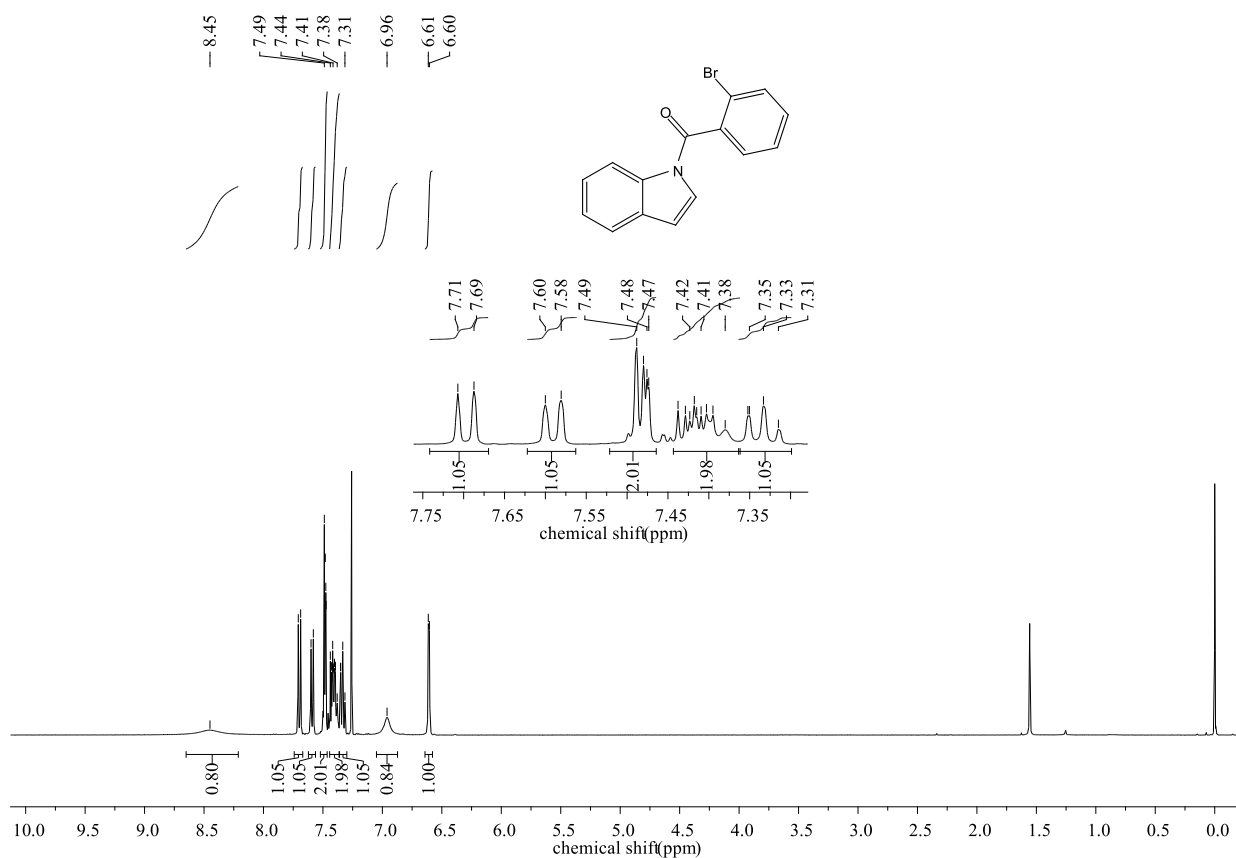

<sup>1</sup>H NMR Spectra of compound **R20** (400 MHz, CDCl<sub>3</sub>)

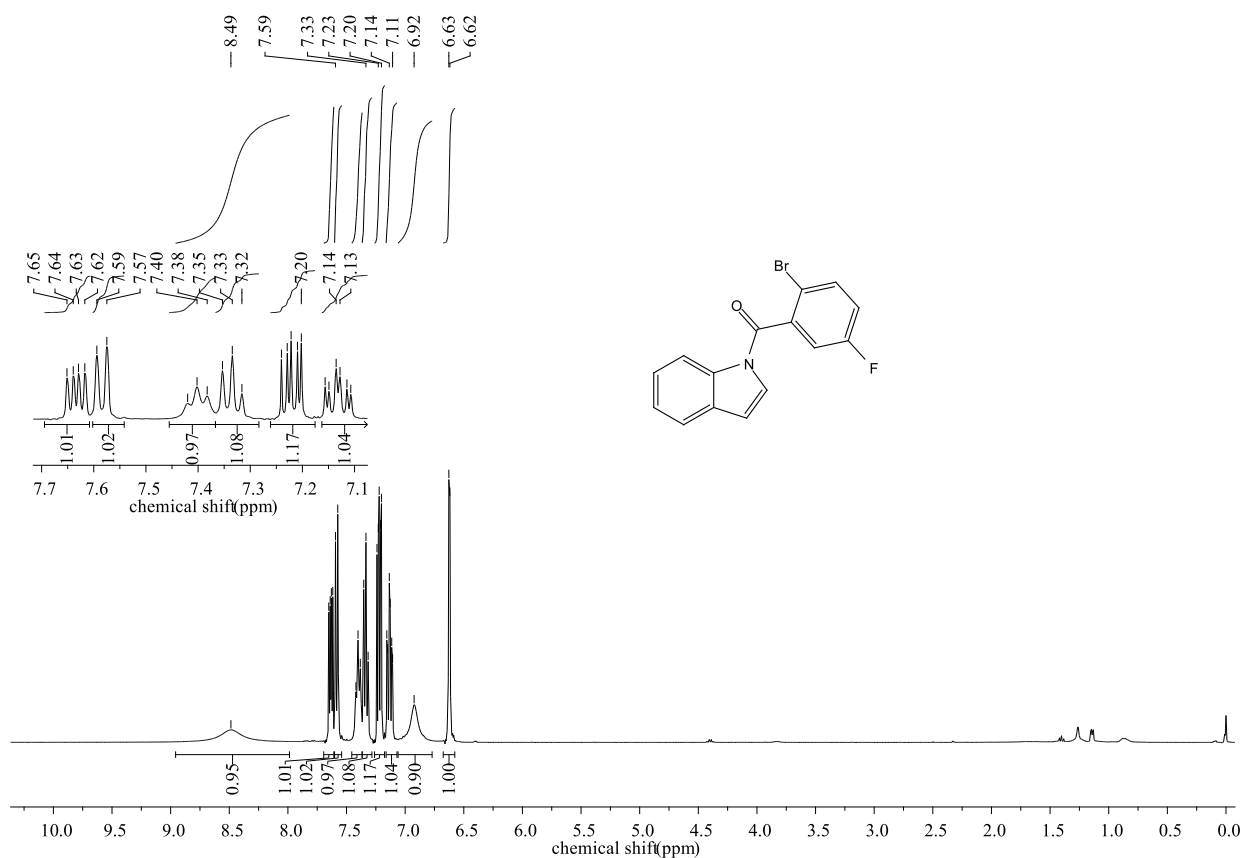

<sup>13</sup>C NMR Spectra of compound **R20** (125 MHz, CDCl<sub>3</sub>)

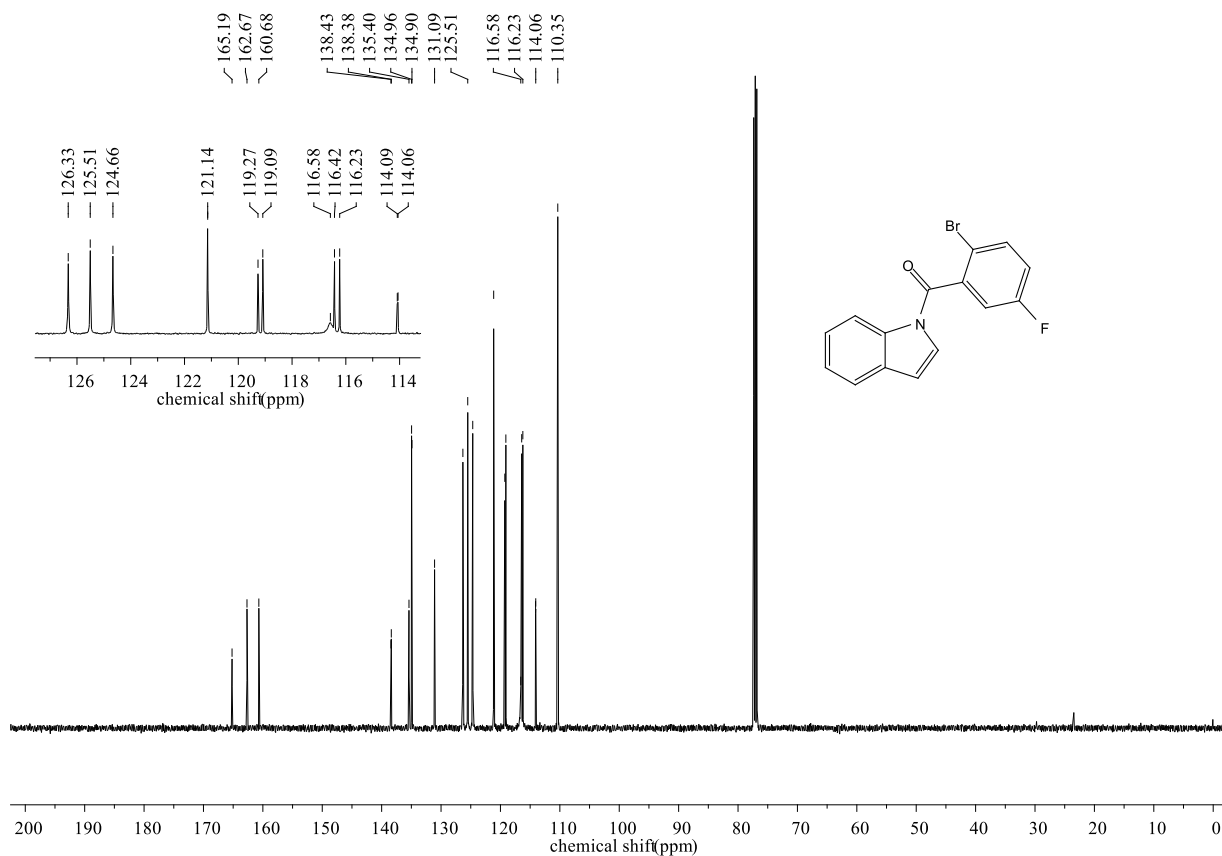

<sup>19</sup>F NMR Spectra of compound **R20** (375 MHz, CDCl<sub>3</sub>)

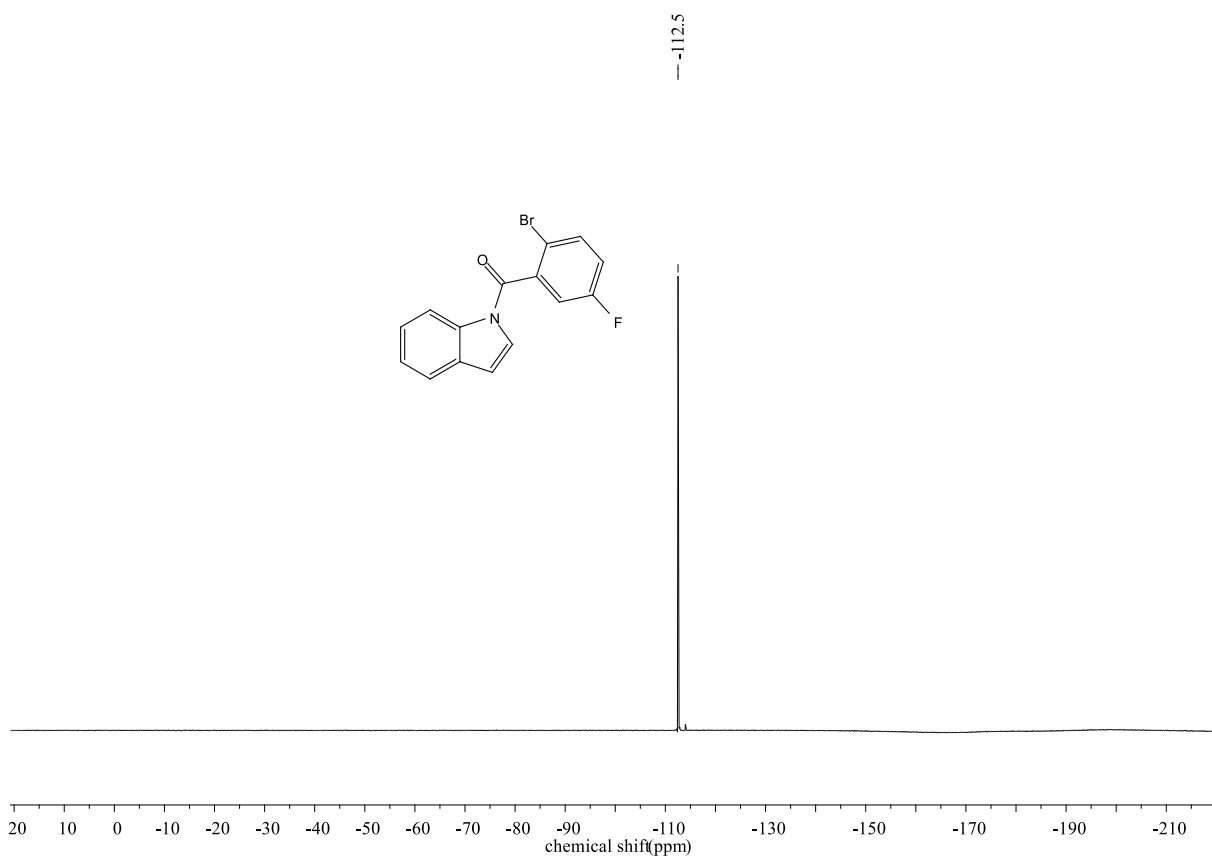

<sup>1</sup>H NMR Spectra of compound **R21** (500 MHz, CDCl<sub>3</sub>)

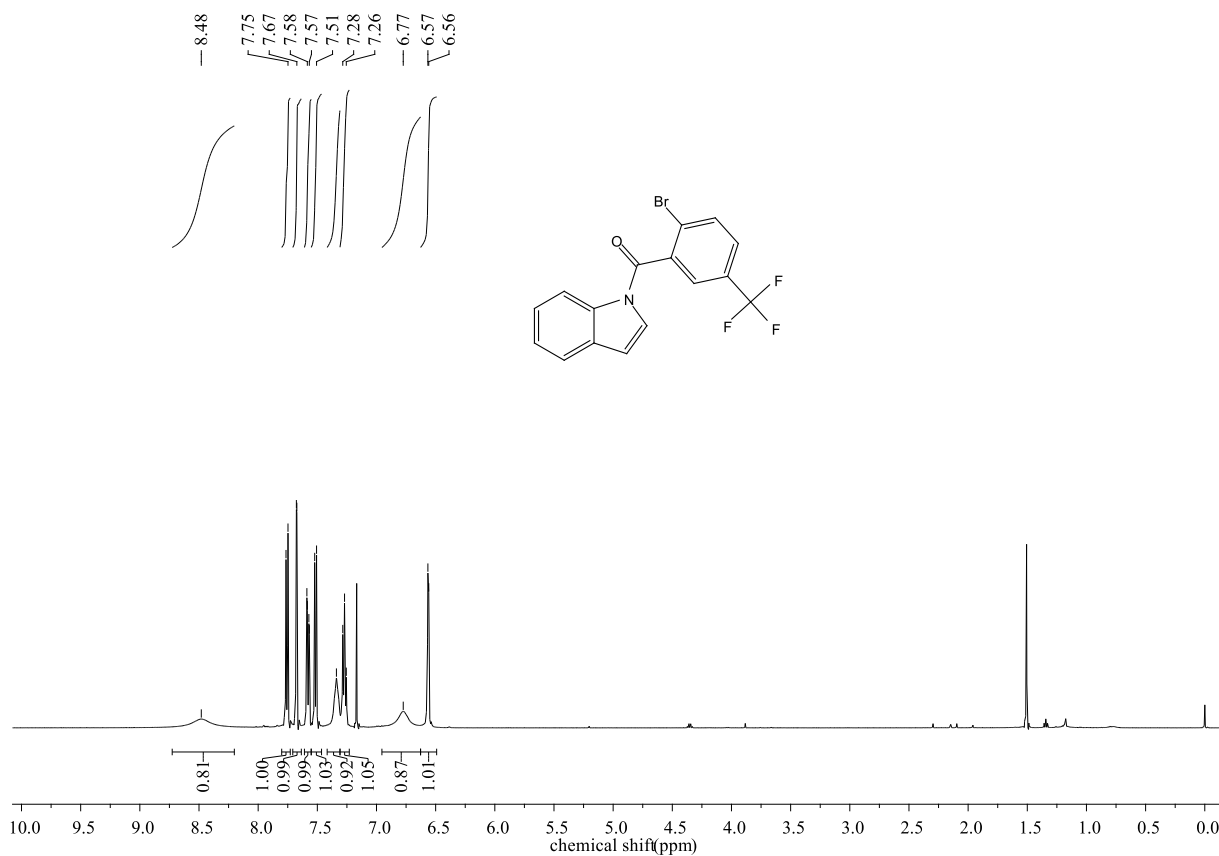

<sup>13</sup>C NMR Spectra of compound **R21** (125 MHz, CDCl<sub>3</sub>)

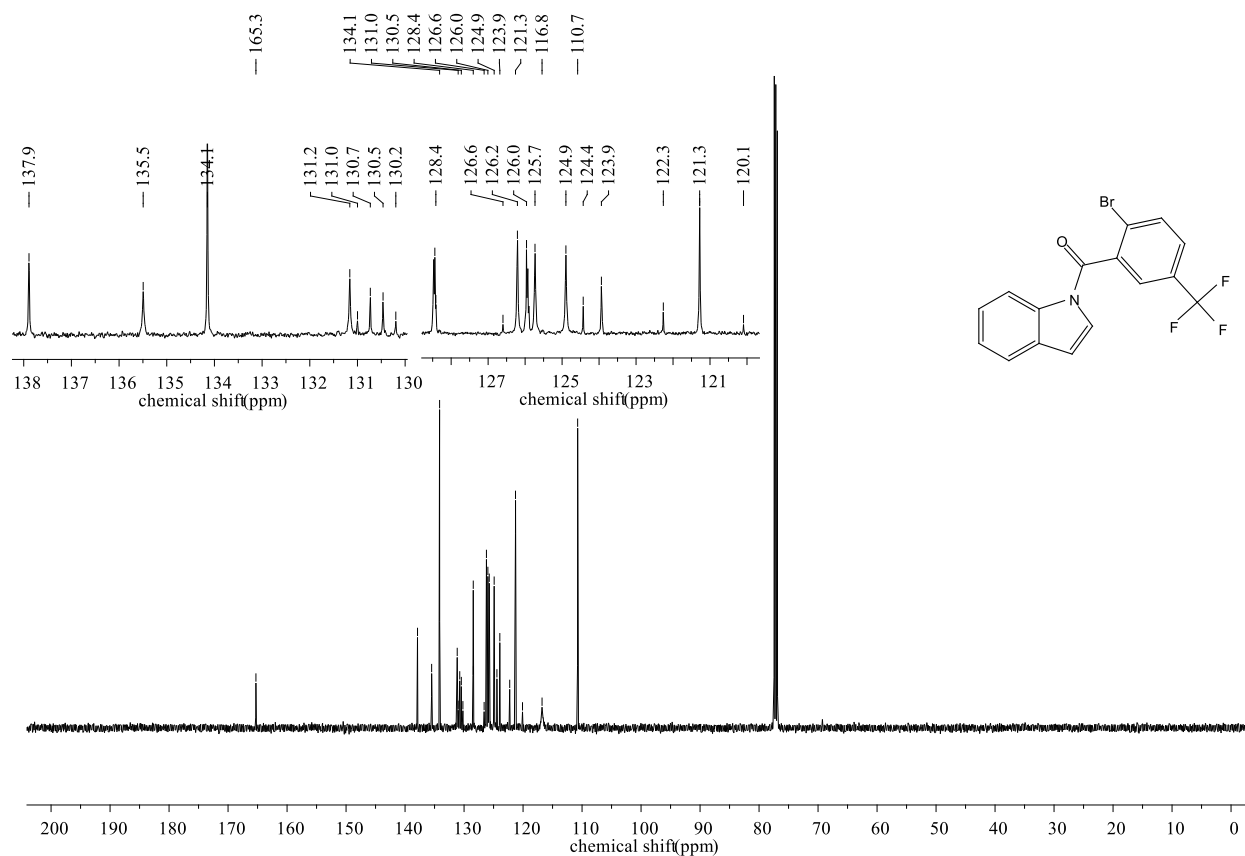

<sup>19</sup>F NMR Spectra of compound **R21** (300 MHz, CDCl<sub>3</sub>)

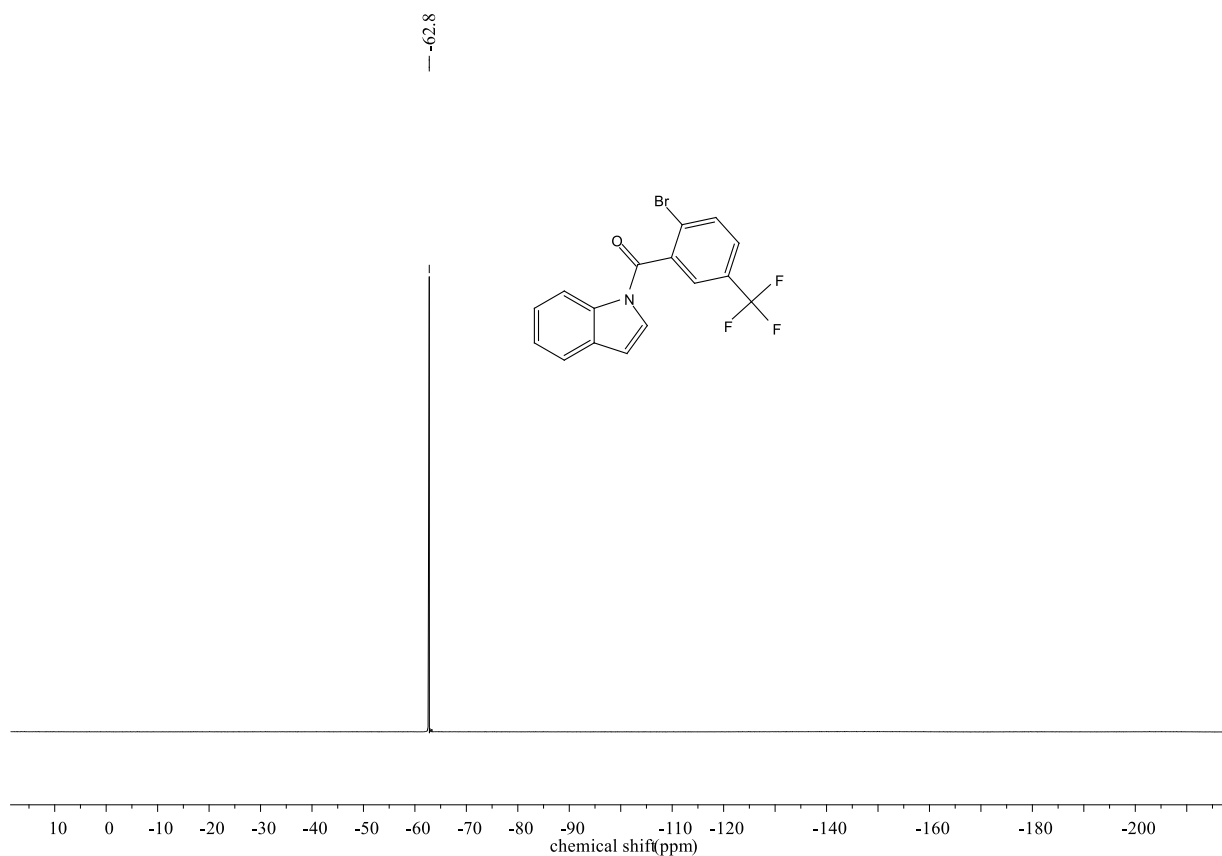

<sup>1</sup>H NMR Spectra of compound **R22** (500 MHz, CDCl<sub>3</sub>)

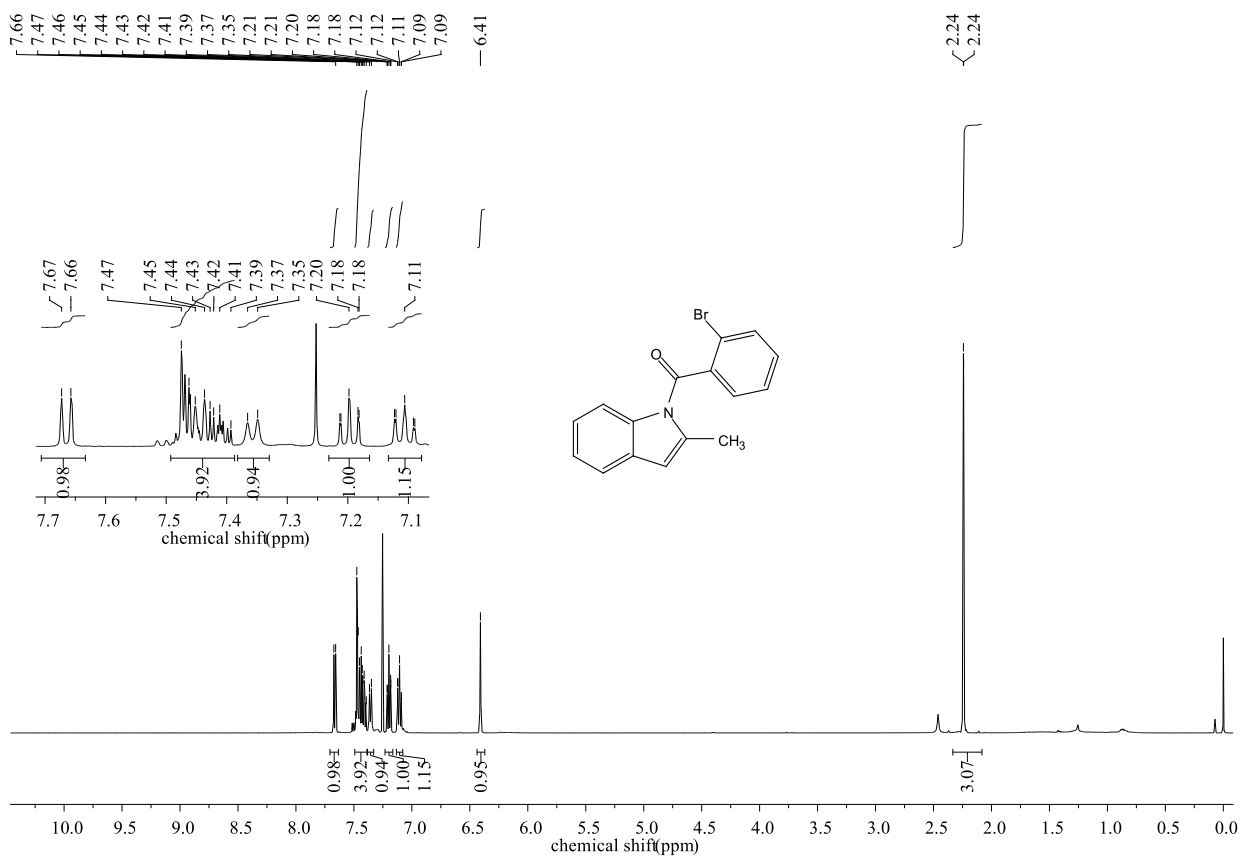

<sup>1</sup>H NMR Spectra of compound **R23** (500 MHz, CDCl<sub>3</sub>)

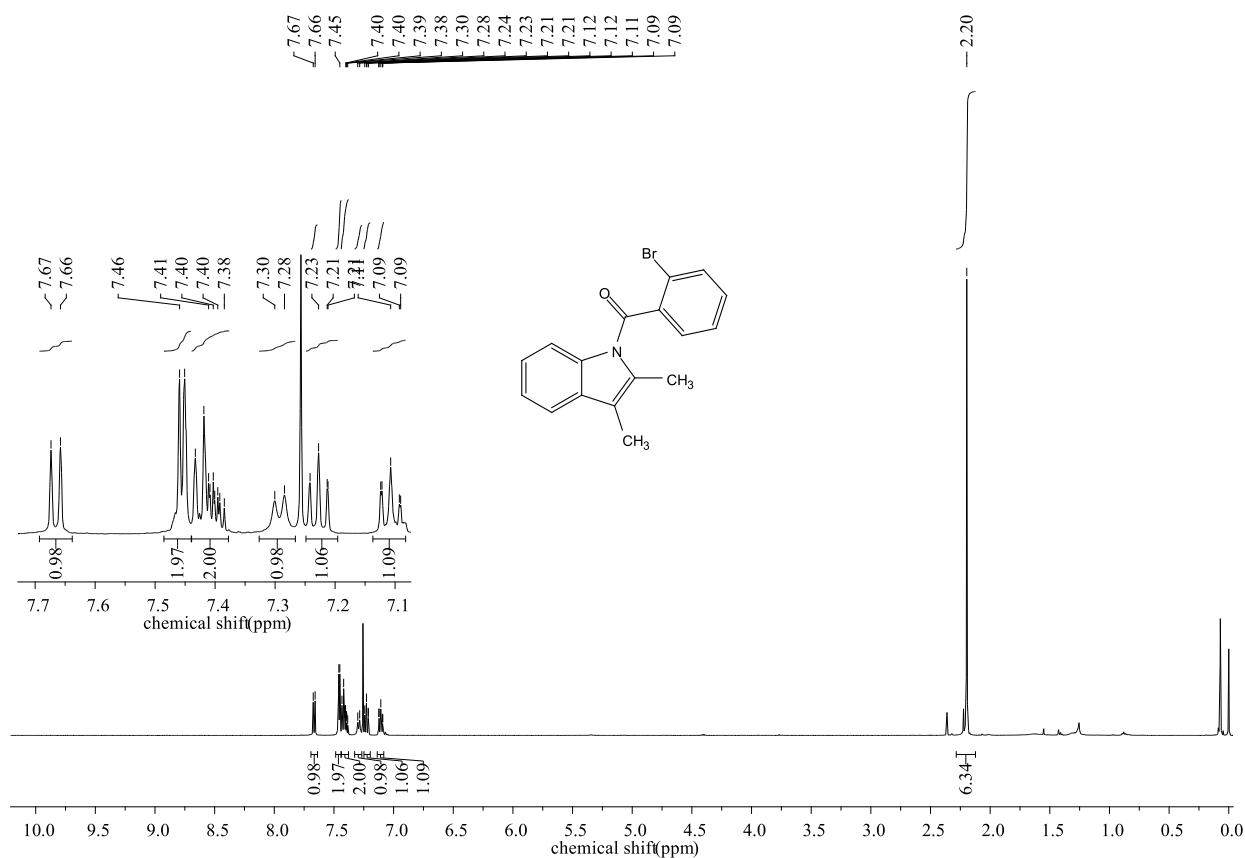

<sup>1</sup>H NMR Spectra of compound **R24** (500 MHz, CDCl<sub>3</sub>)

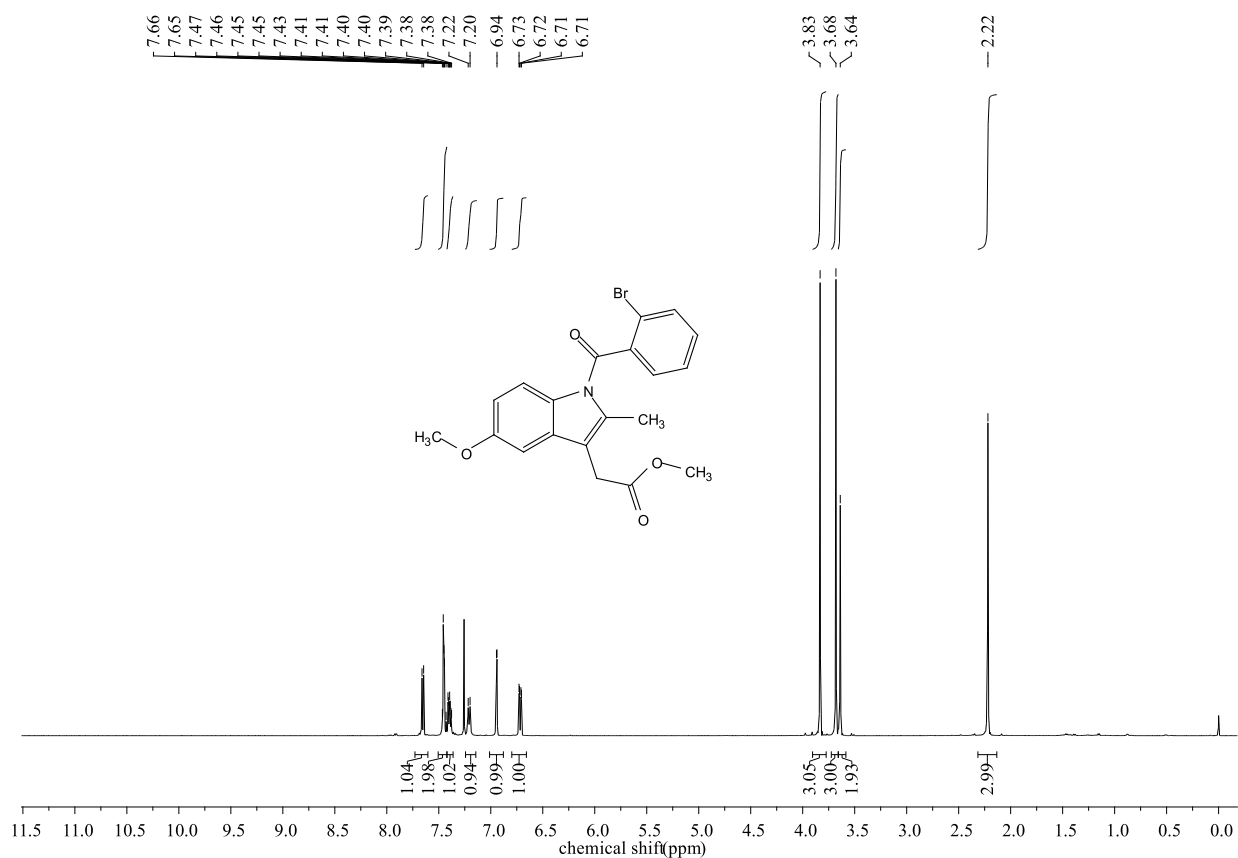

<sup>13</sup>C NMR Spectra of compound **R24** (125 MHz, CDCl<sub>3</sub>)

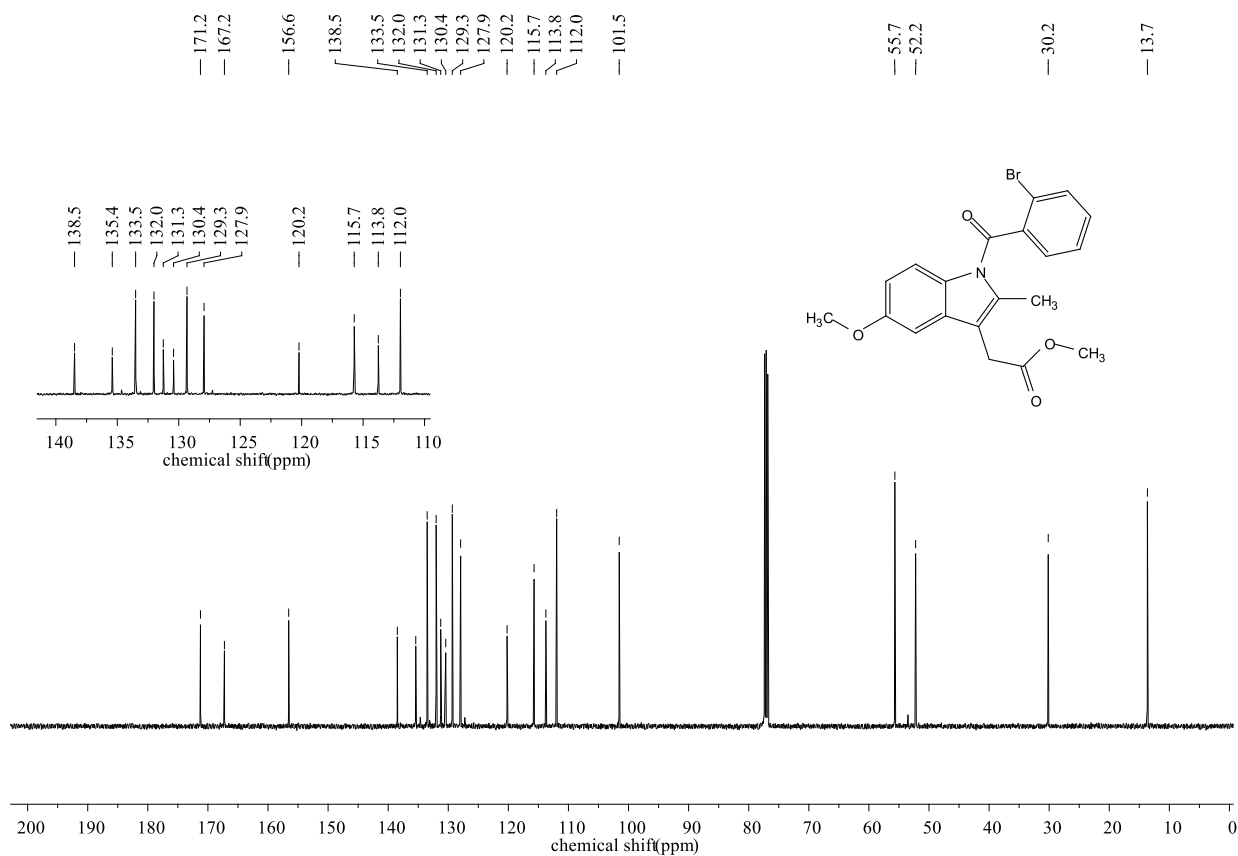

<sup>1</sup>H NMR Spectra of compound **R25** (400 MHz, CDCl<sub>3</sub>)

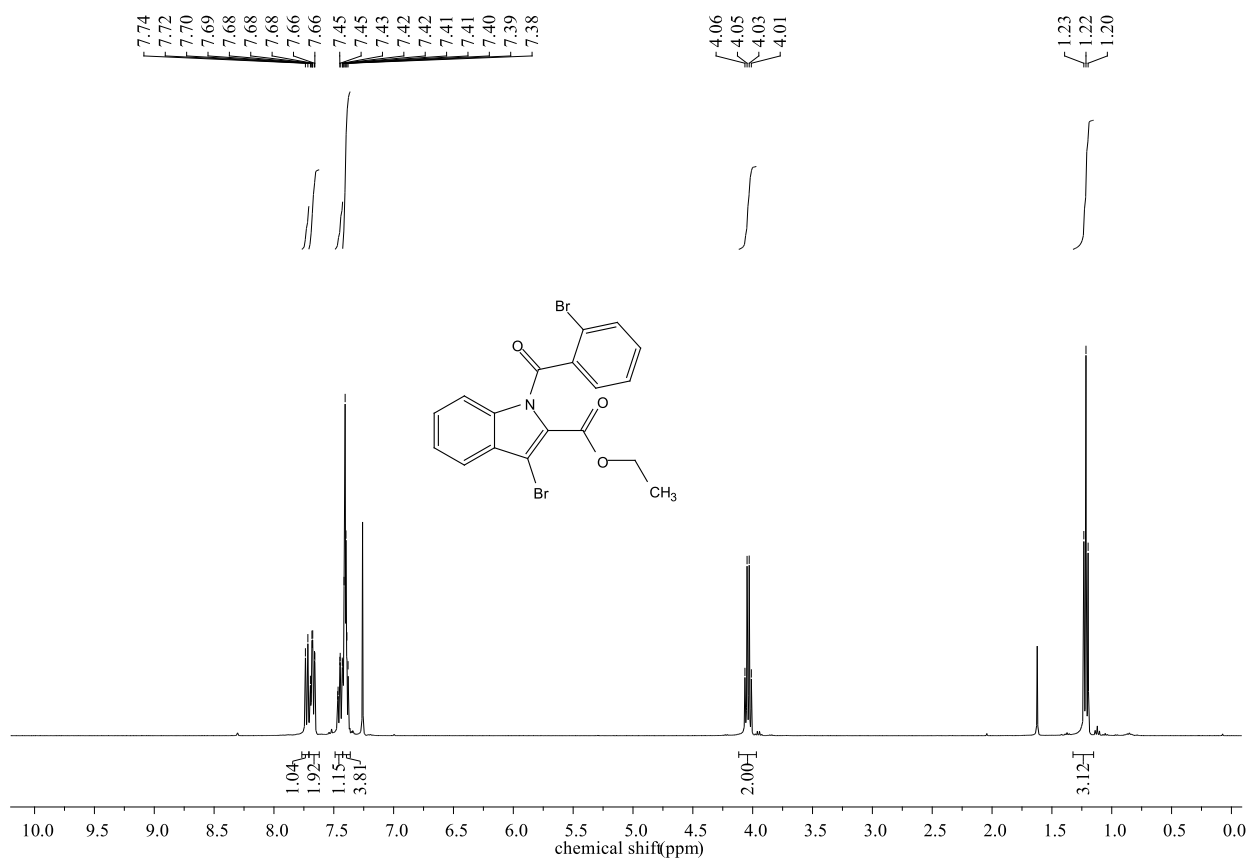

$^{13}\text{C}$  NMR Spectra of compound **R25** (100 MHz,  $\text{CDCl}_3$ )

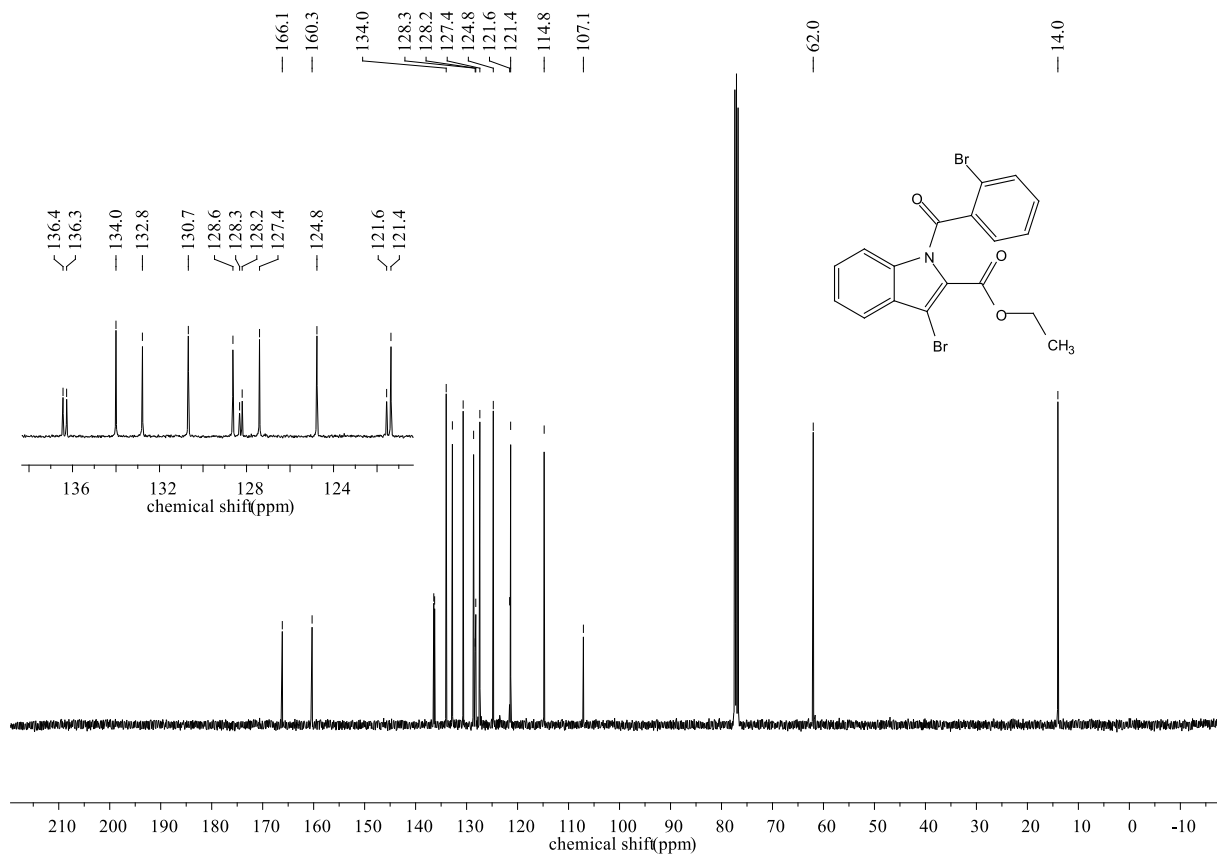

$^1\text{H}$  NMR Spectra of compound **R26** (500 MHz,  $\text{CDCl}_3$ )

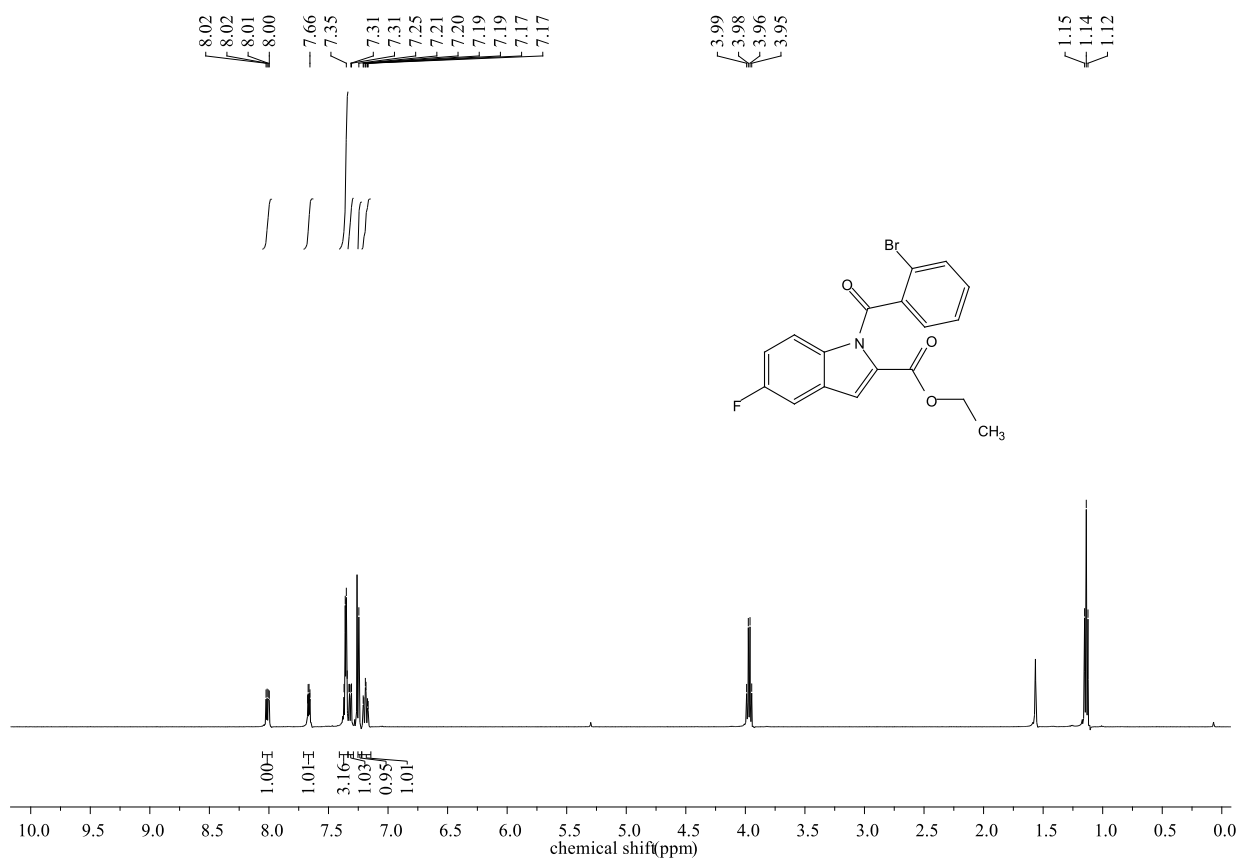

<sup>13</sup>C NMR Spectra of compound **R26** (125 MHz, CDCl<sub>3</sub>)

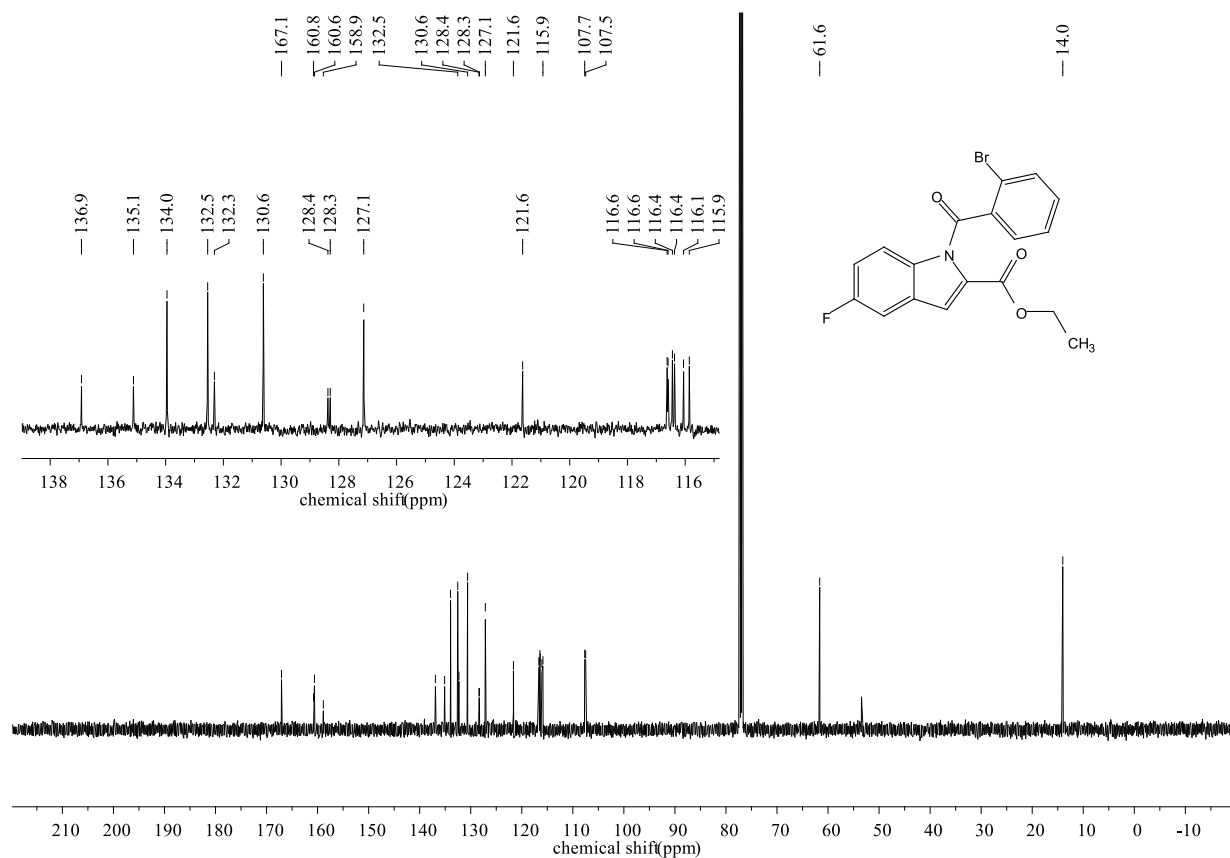

<sup>19</sup>F NMR Spectra of compound **R26** (375 MHz, CDCl<sub>3</sub>).

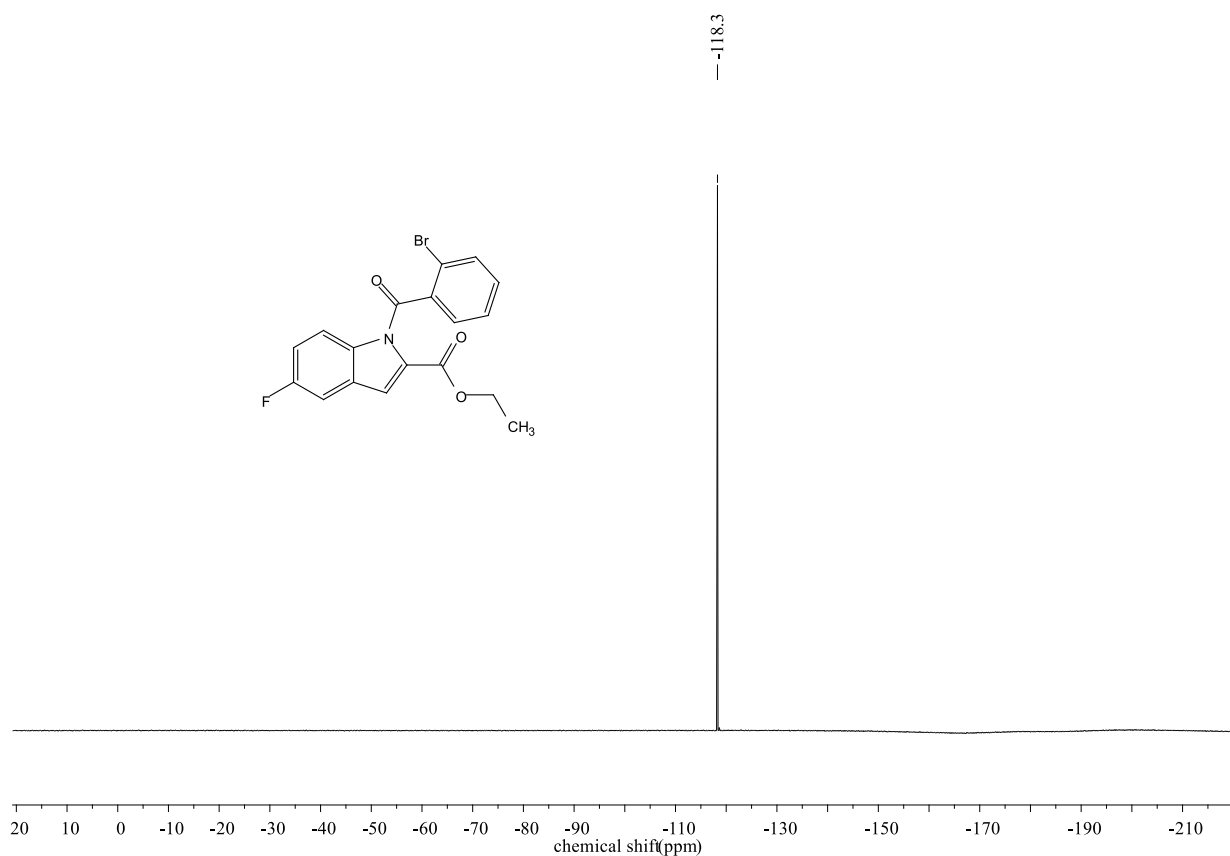

<sup>1</sup>H NMR Spectra of compound **R27** (500 MHz, CDCl<sub>3</sub>)

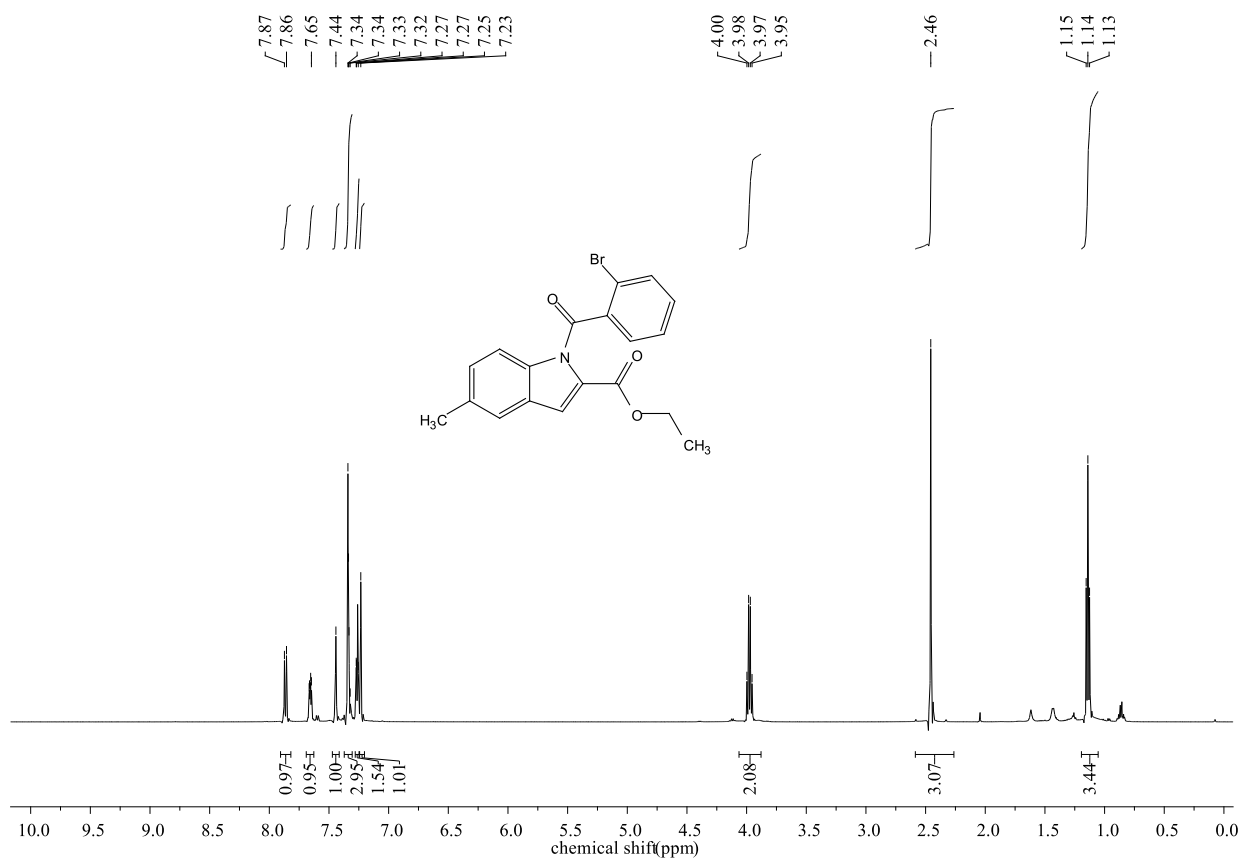

<sup>13</sup>C NMR Spectra of compound **R27** (125 MHz, CDCl<sub>3</sub>)

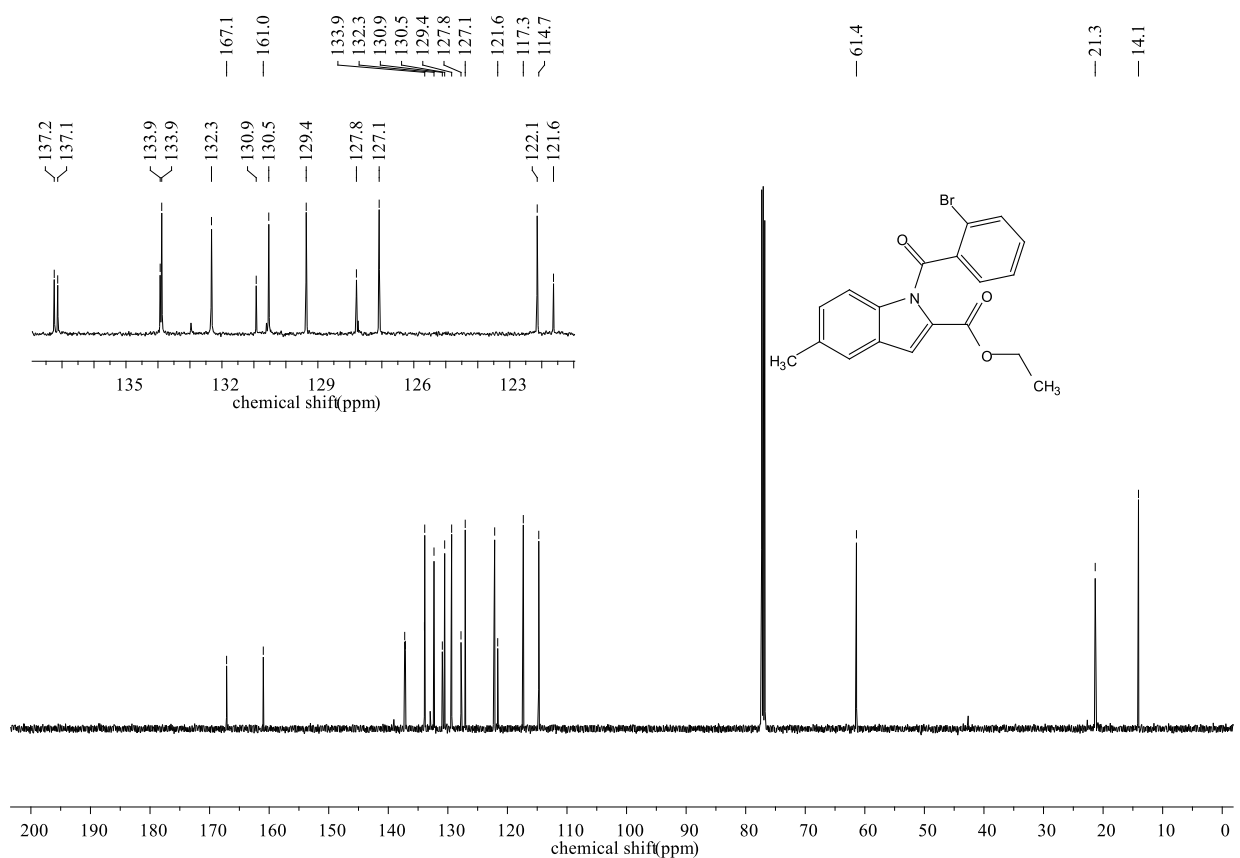

<sup>1</sup>H NMR Spectra of compound **R28** (500 MHz, CDCl<sub>3</sub>)

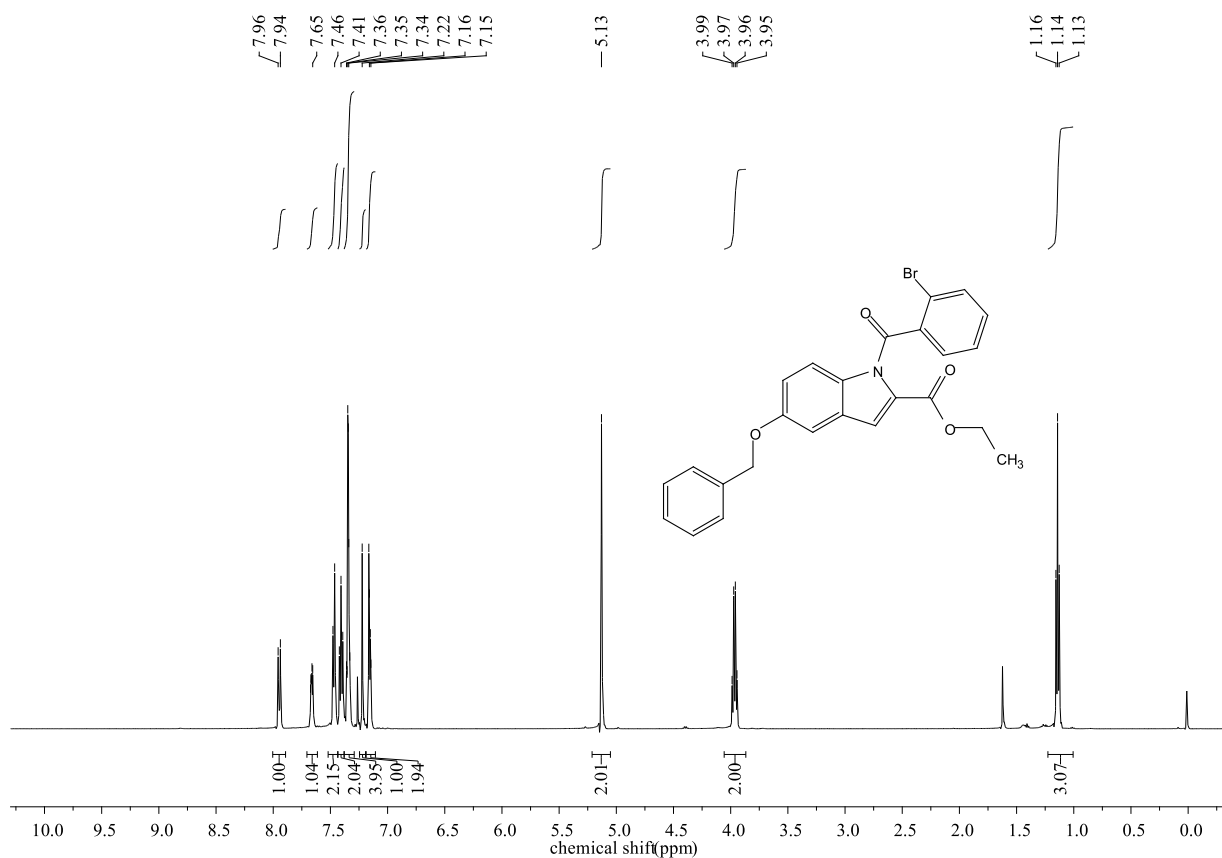

<sup>13</sup>C NMR Spectra of compound **R28** (100 MHz, CDCl<sub>3</sub>)

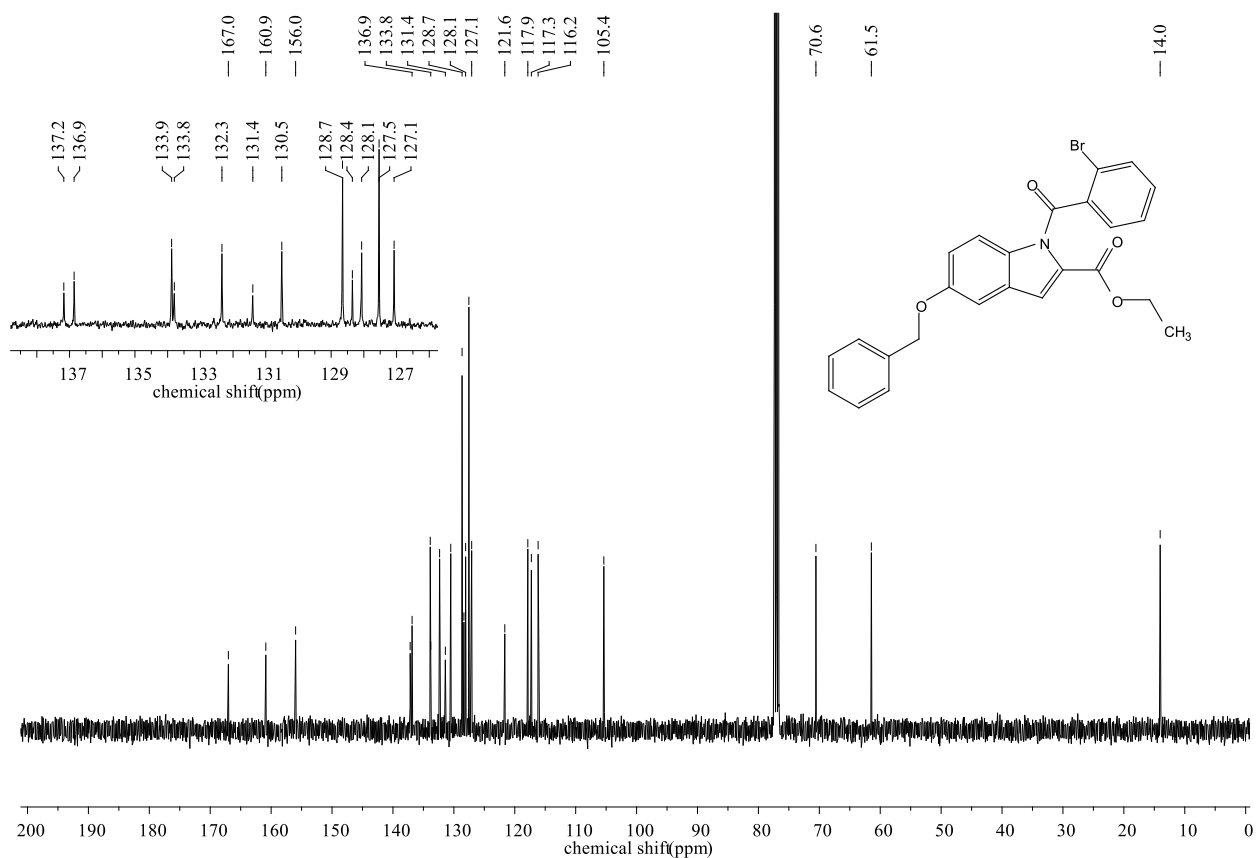

<sup>1</sup>H NMR Spectra of compound **R29** (500 MHz, CDCl<sub>3</sub>)

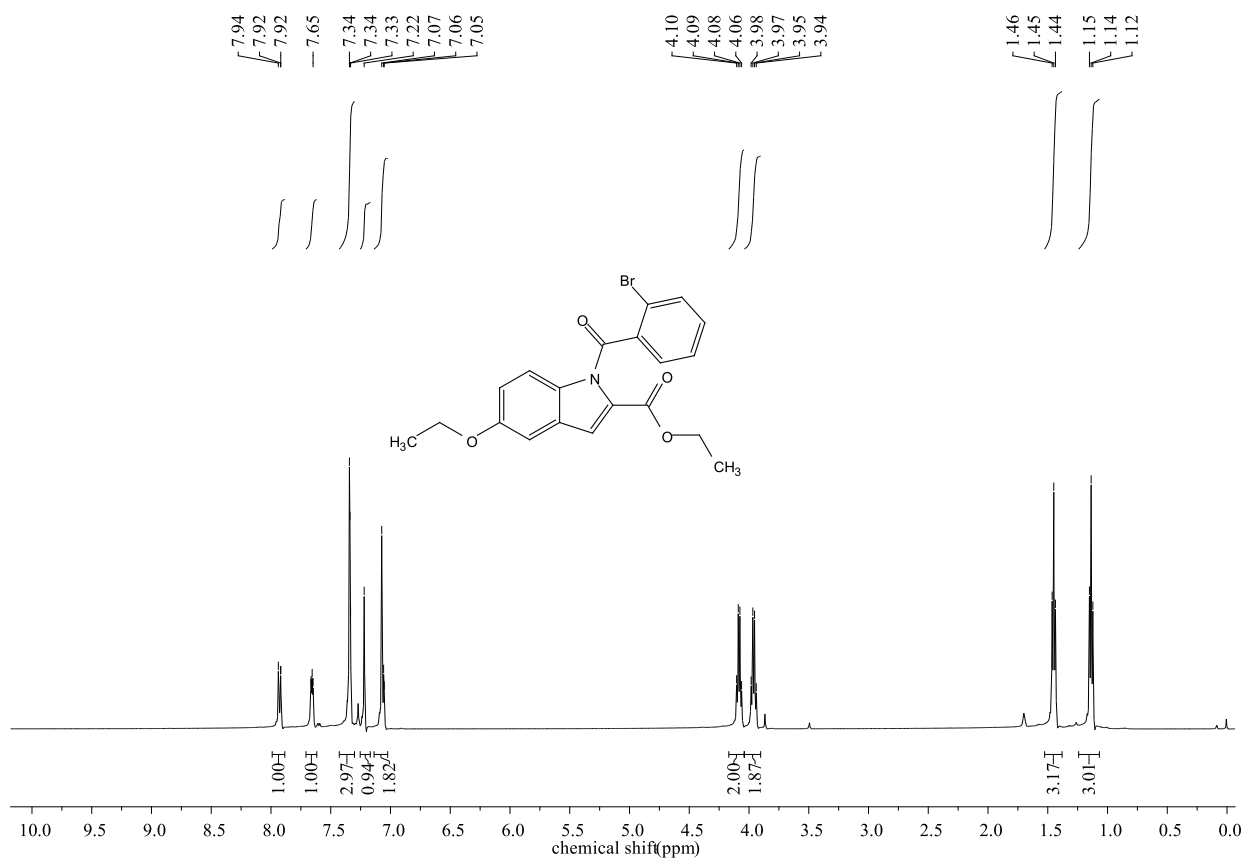

<sup>13</sup>C NMR Spectra of compound **R29** (100 MHz, CDCl<sub>3</sub>)

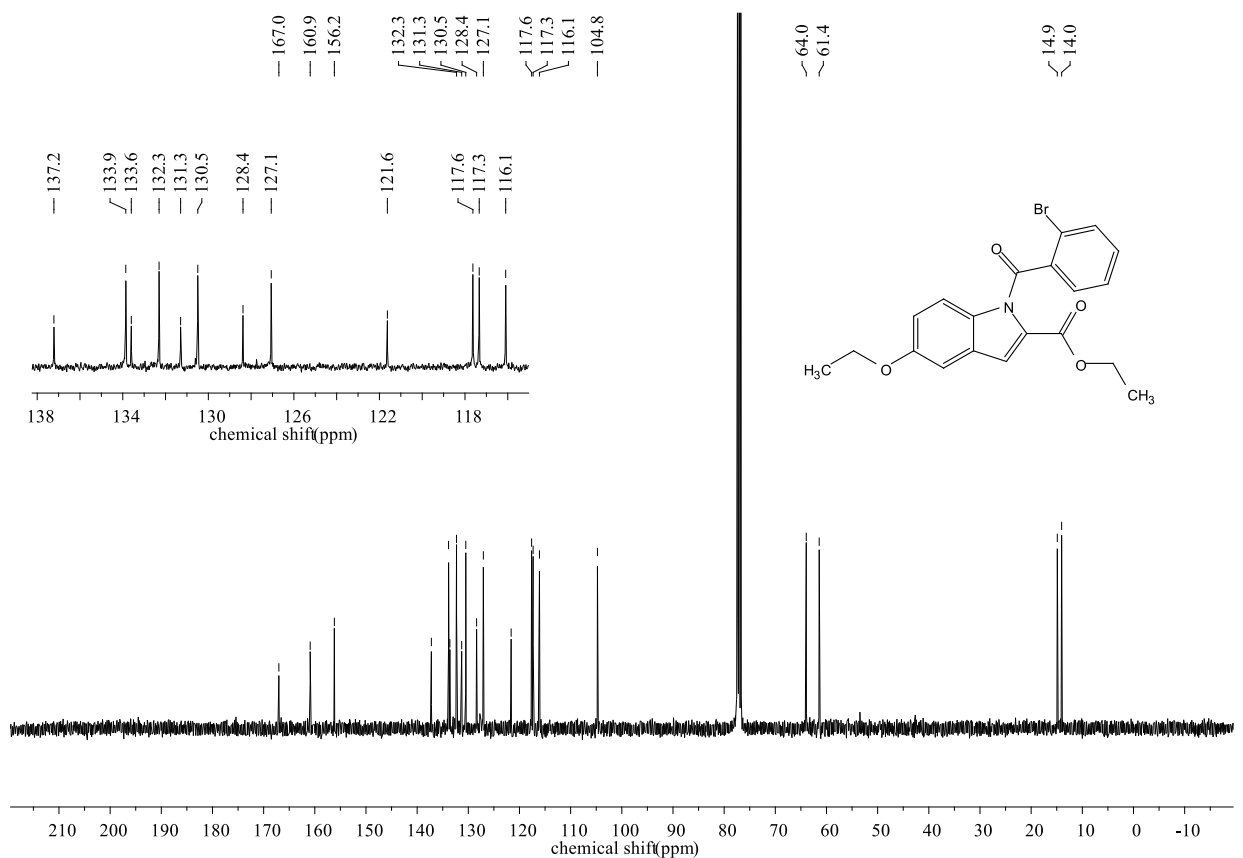

<sup>1</sup>H NMR Spectra of compound **R30** (400 MHz, CDCl<sub>3</sub>)

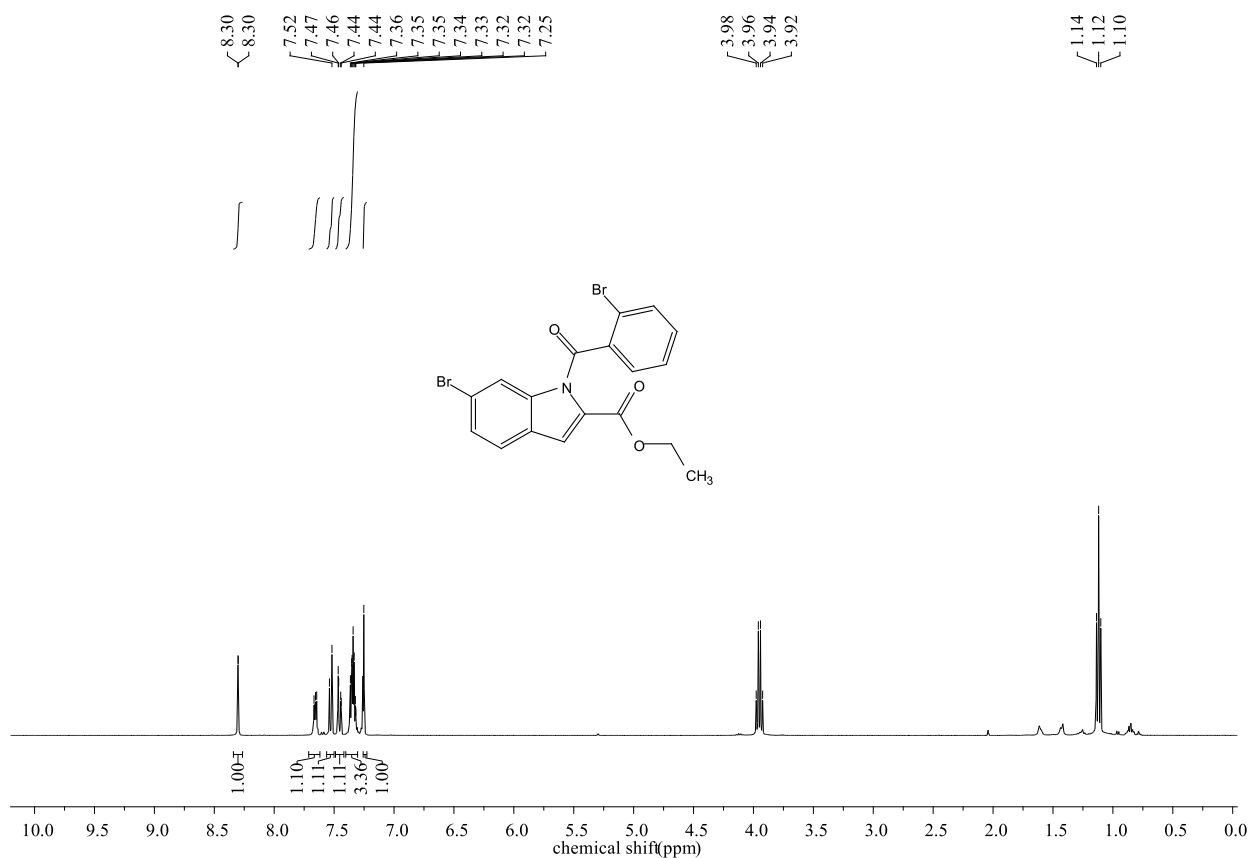

<sup>13</sup>C NMR Spectra of compound **R30** (125 MHz, CDCl<sub>3</sub>)

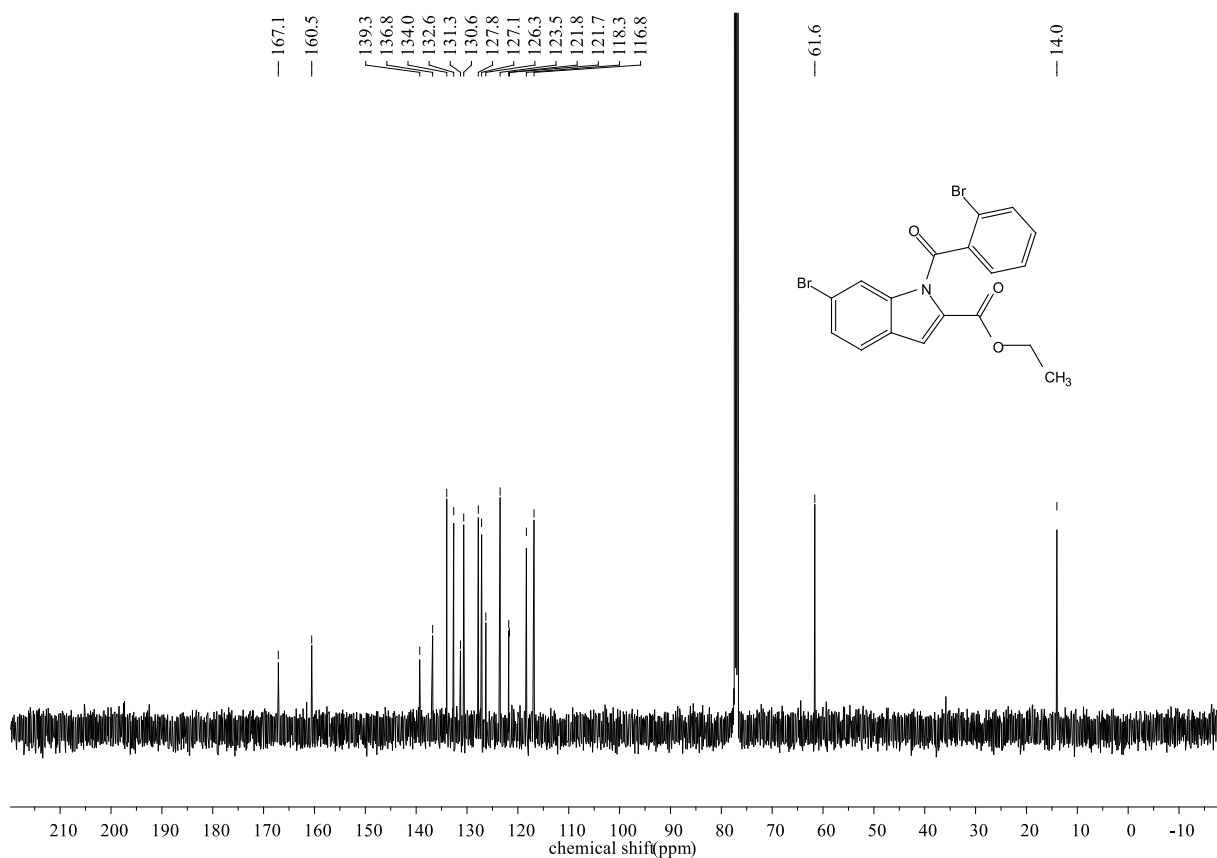

<sup>1</sup>H NMR Spectra of compound **R31** (500 MHz, CDCl<sub>3</sub>)

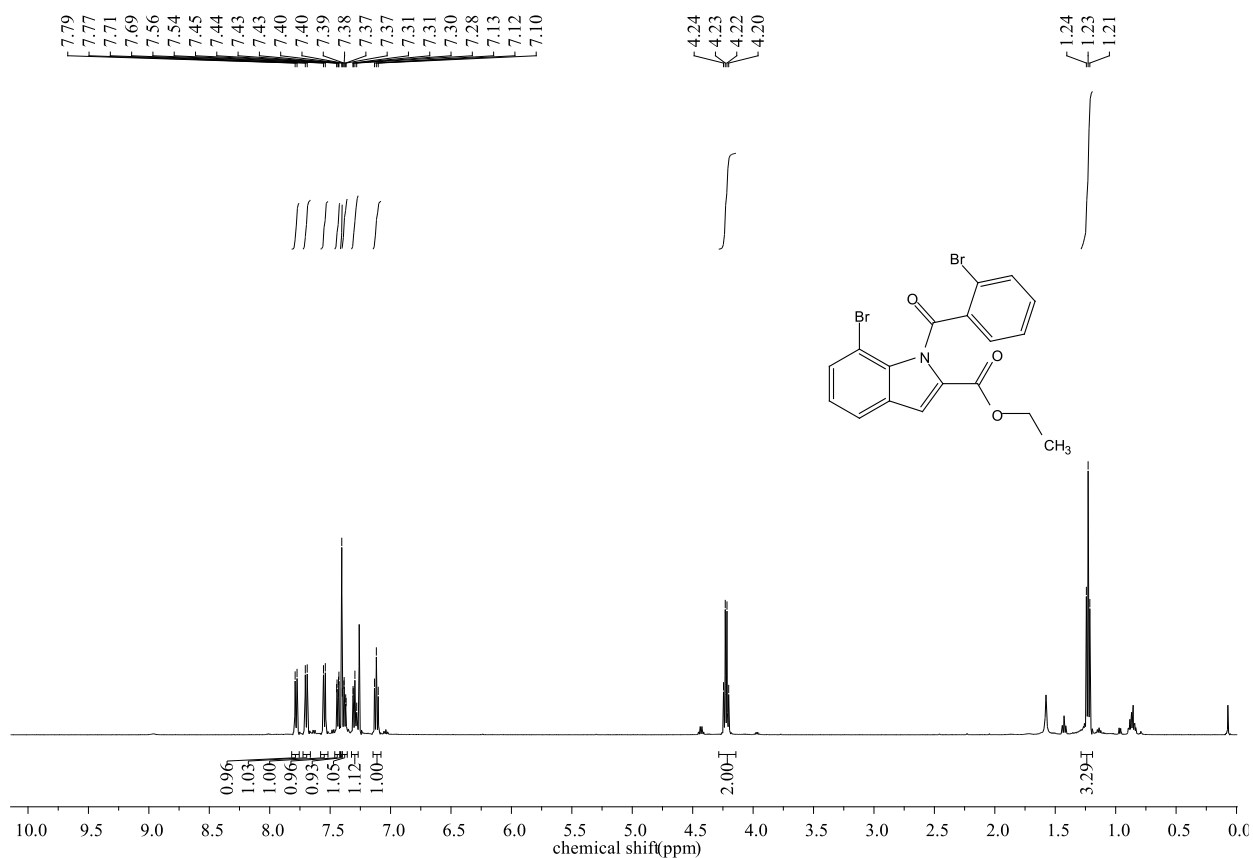

<sup>13</sup>C NMR Spectra of compound **R31** (125 MHz, CDCl<sub>3</sub>)

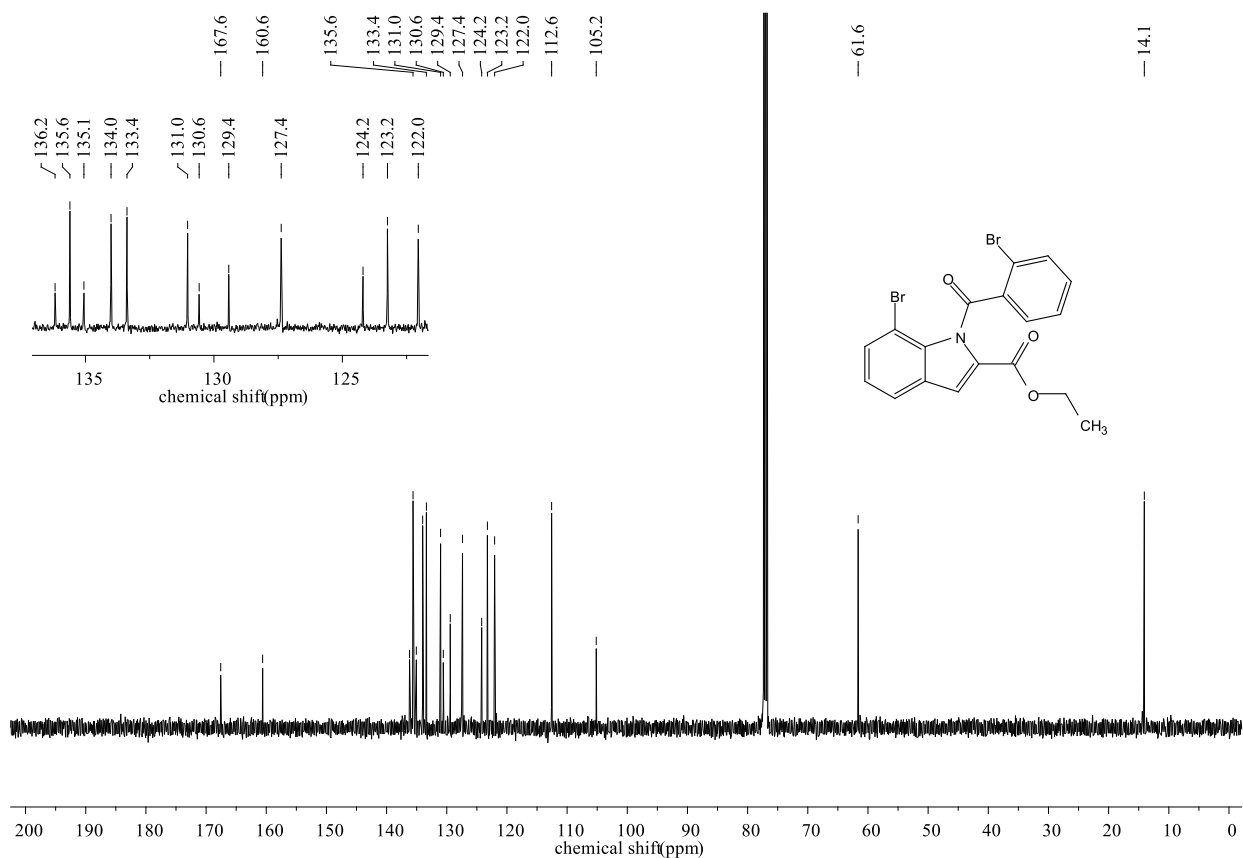

<sup>1</sup>H NMR Spectra of compound **R32** (500 MHz, CDCl<sub>3</sub>)

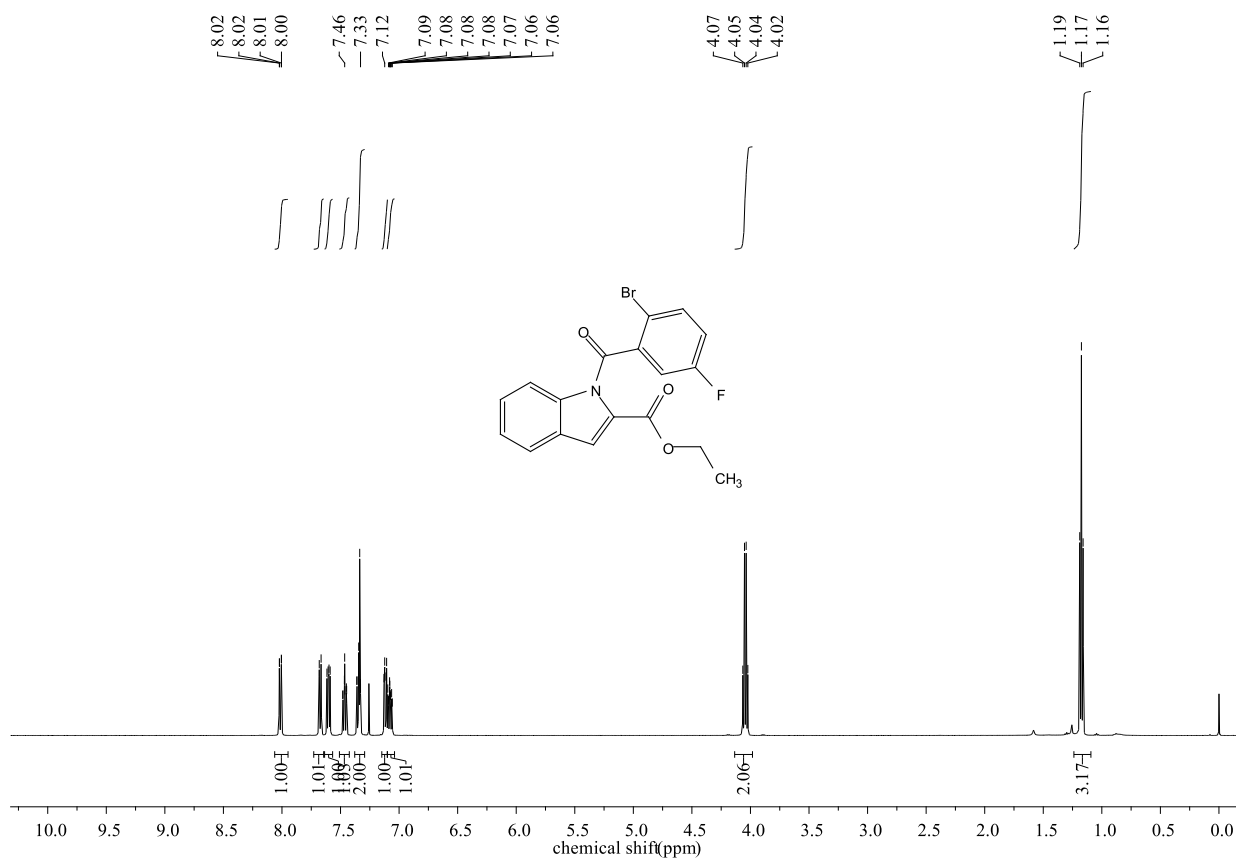

<sup>13</sup>C NMR Spectra of compound **R32** (100 MHz, CDCl<sub>3</sub>)

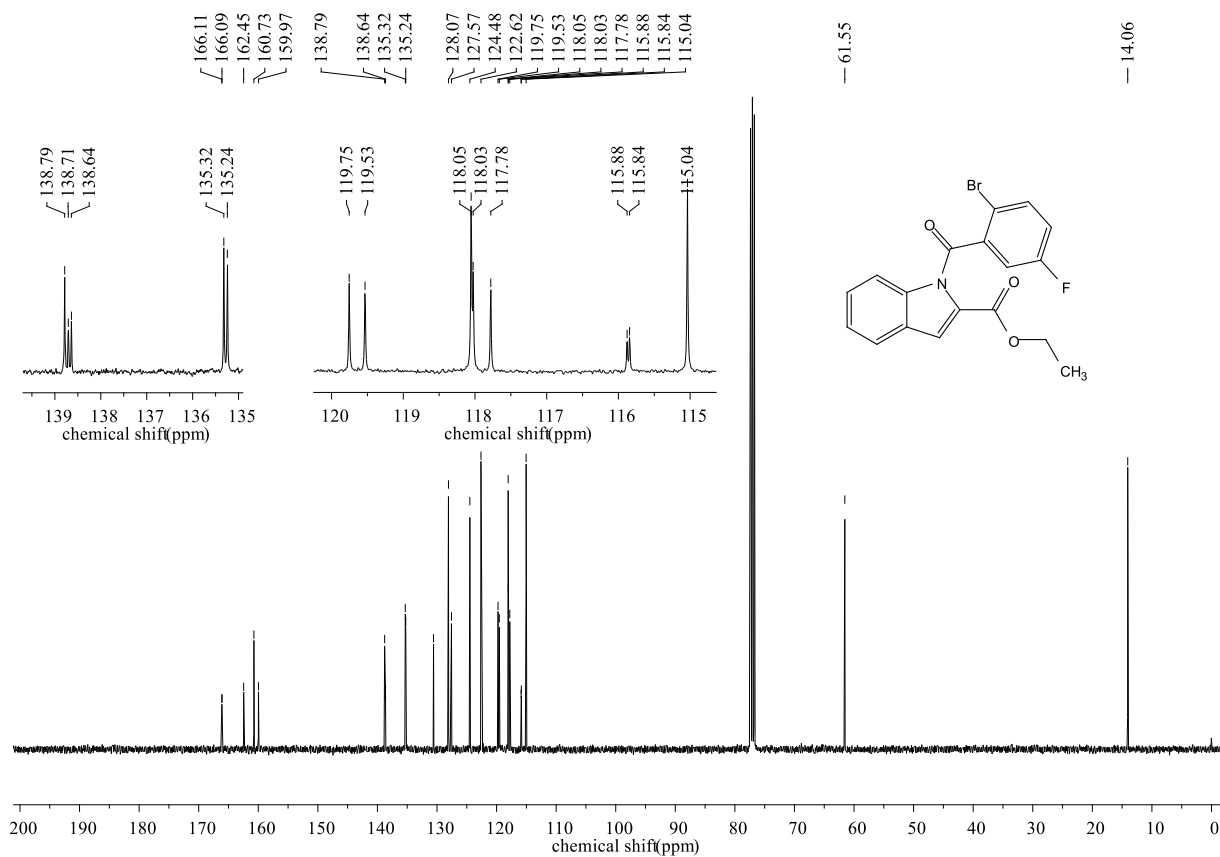

<sup>19</sup>F NMR Spectra of compound **R32** (300 MHz, CDCl<sub>3</sub>)

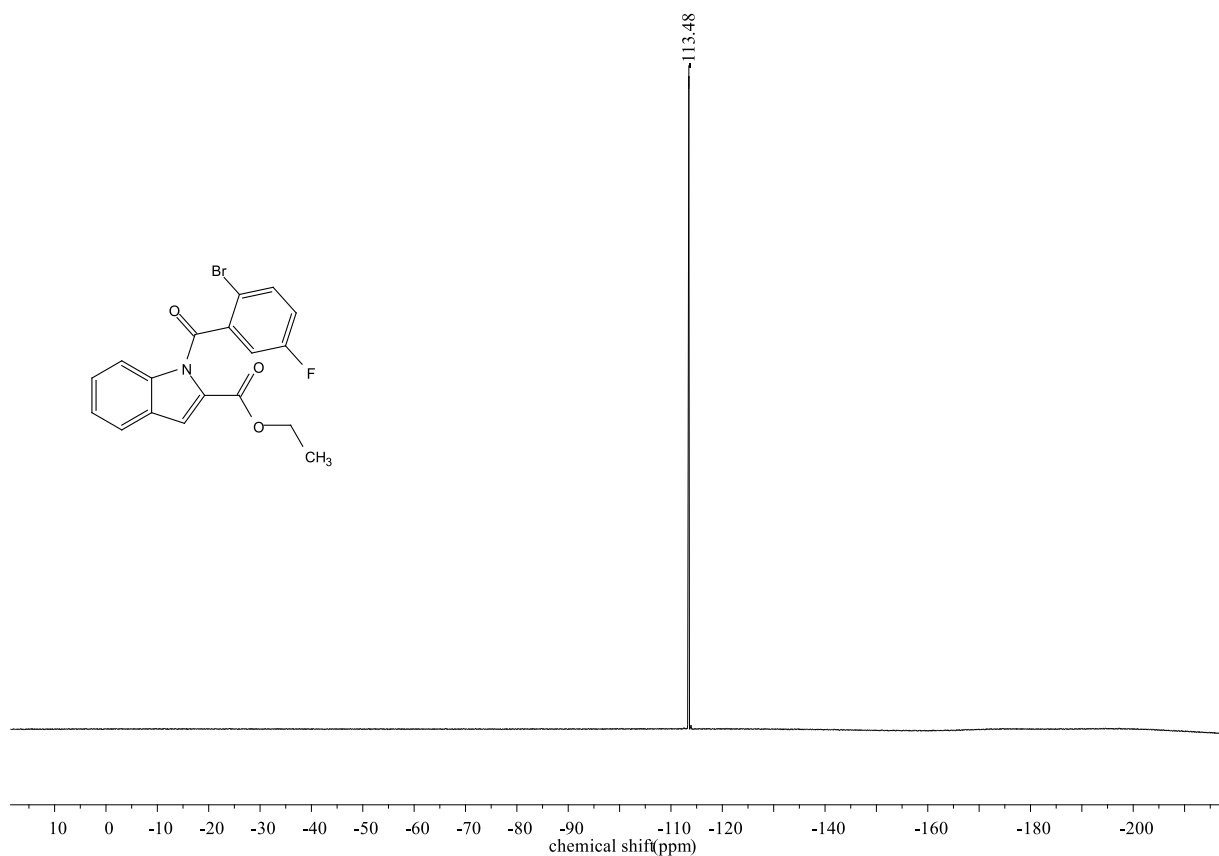

<sup>1</sup>H NMR Spectra of compound **R33** (500 MHz, CDCl<sub>3</sub>)

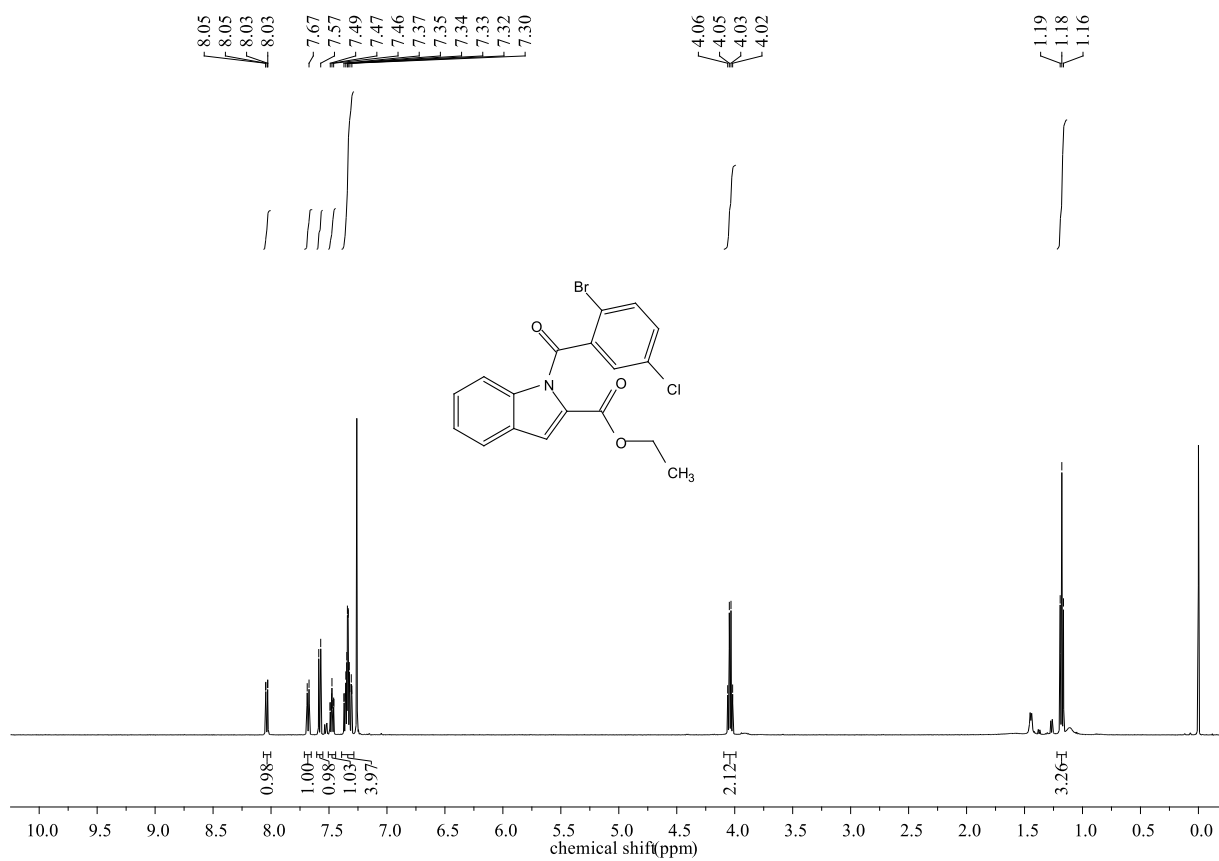

$^{13}\text{C}$  NMR Spectra of compound **R33** (125 MHz,  $\text{CDCl}_3$ )

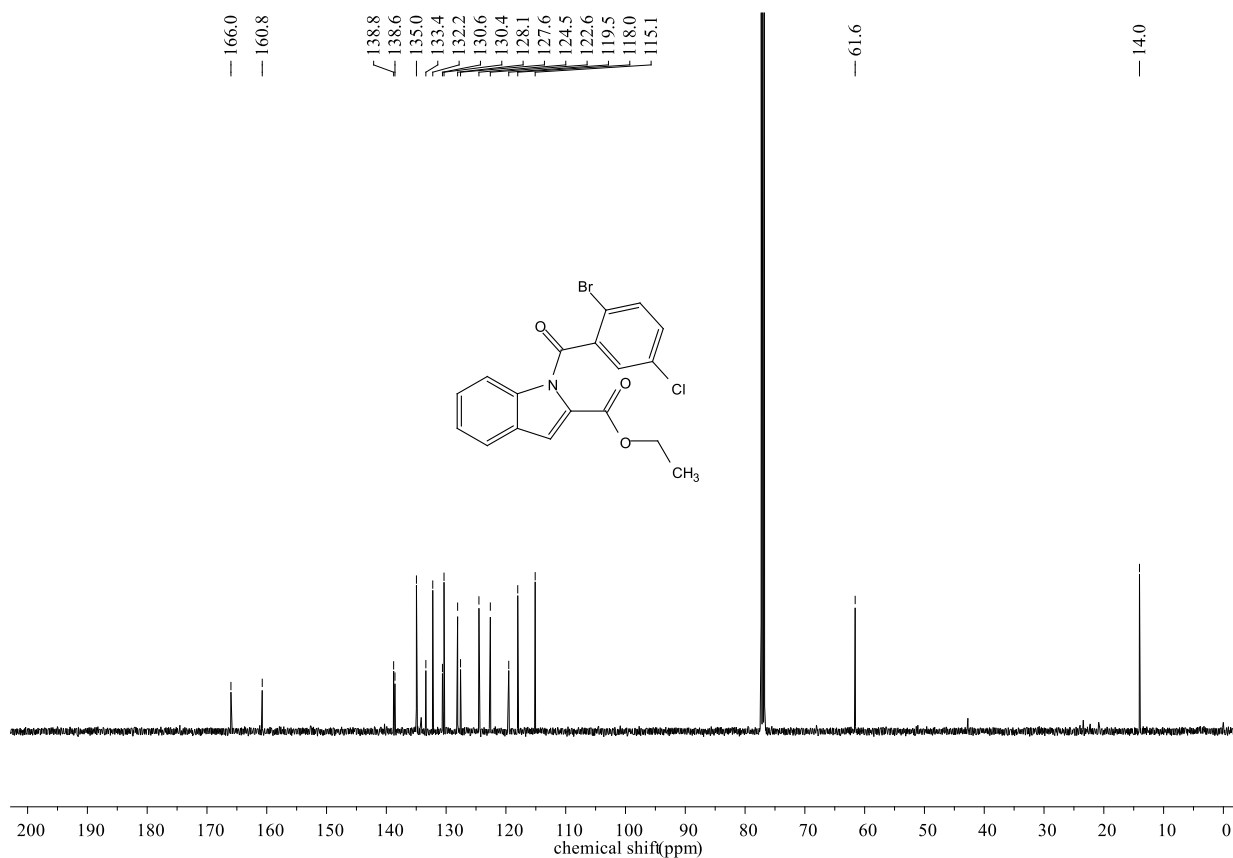

$^1\text{H}$  NMR Spectra of compound **R34** (400 MHz,  $\text{CDCl}_3$ )

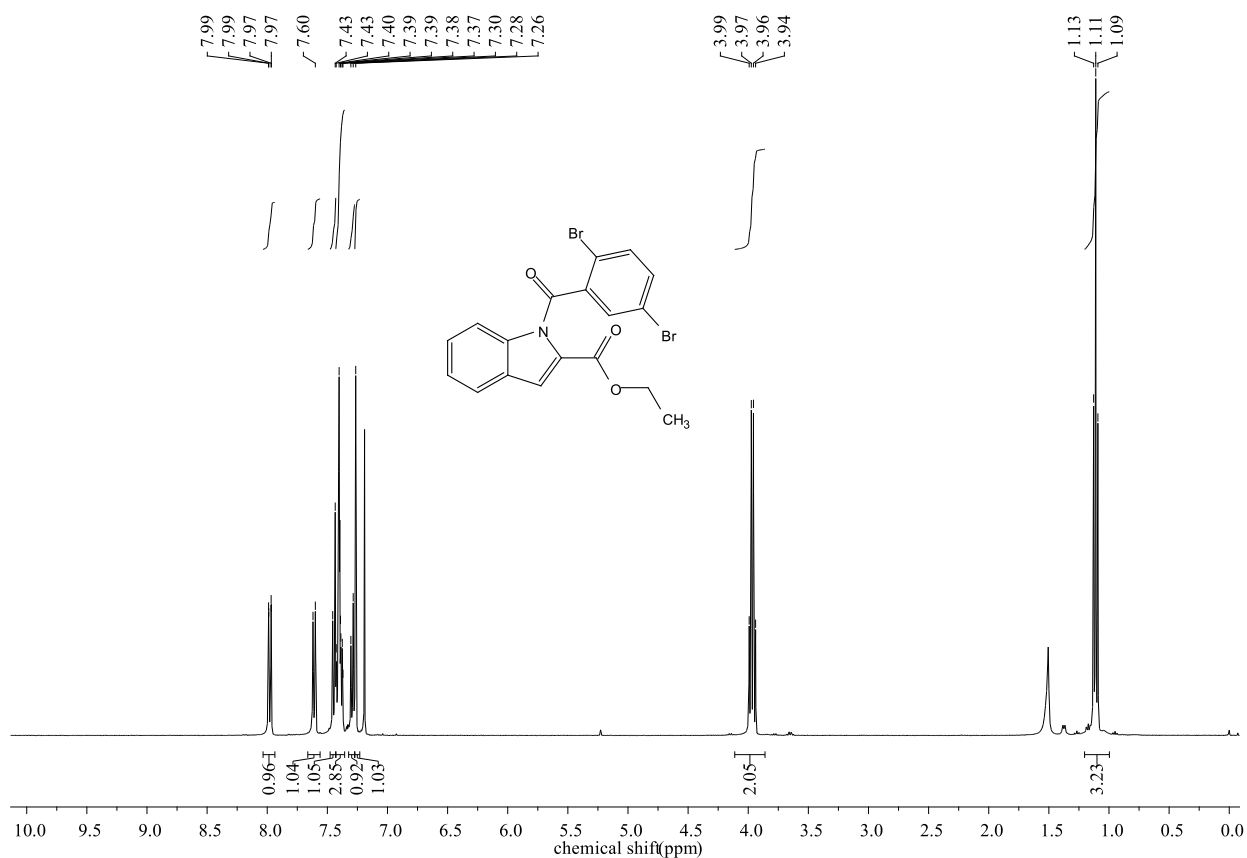

<sup>13</sup>C NMR Spectra of compound **R34** (125 MHz, CDCl<sub>3</sub>)

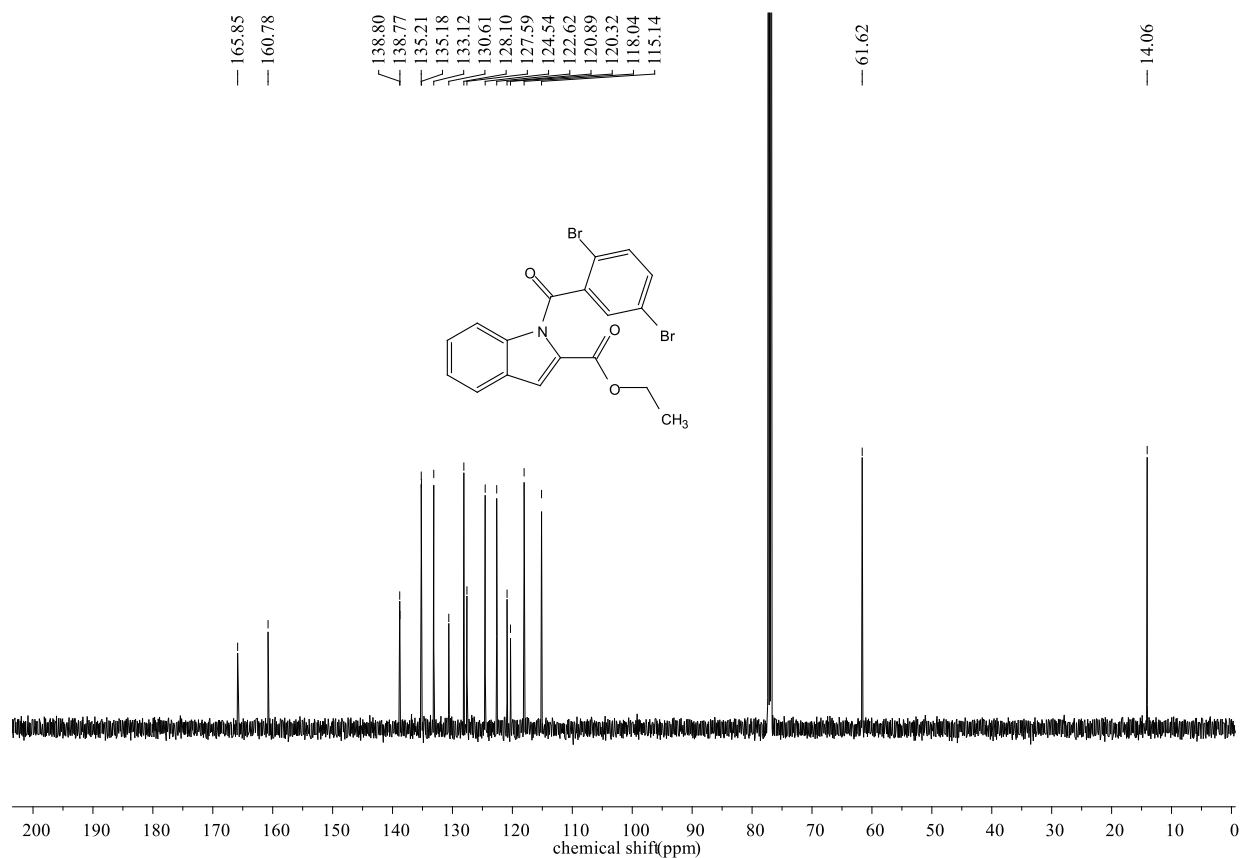

<sup>1</sup>H NMR Spectra of compound **R35** (500 MHz, CDCl<sub>3</sub>)

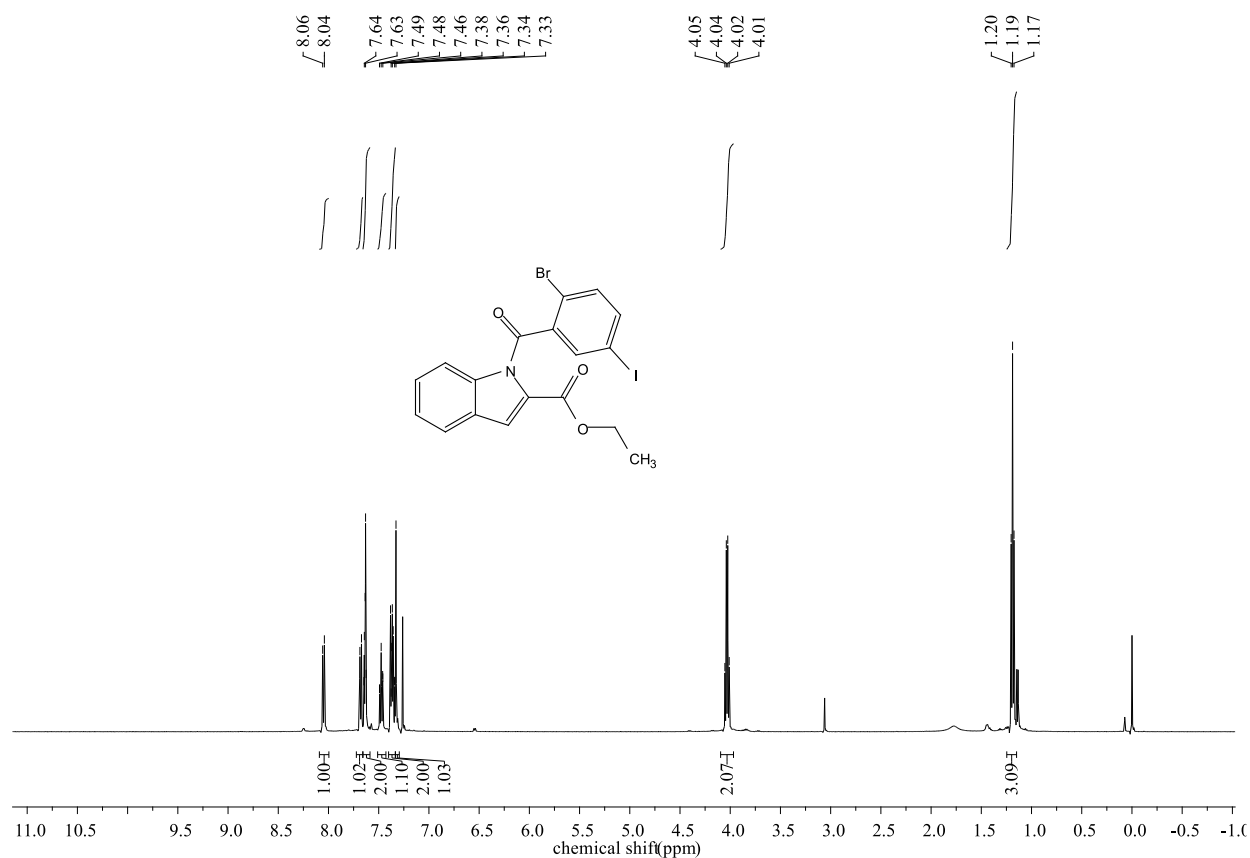

<sup>13</sup>C NMR Spectra of compound **R35** (125 MHz, CDCl<sub>3</sub>)

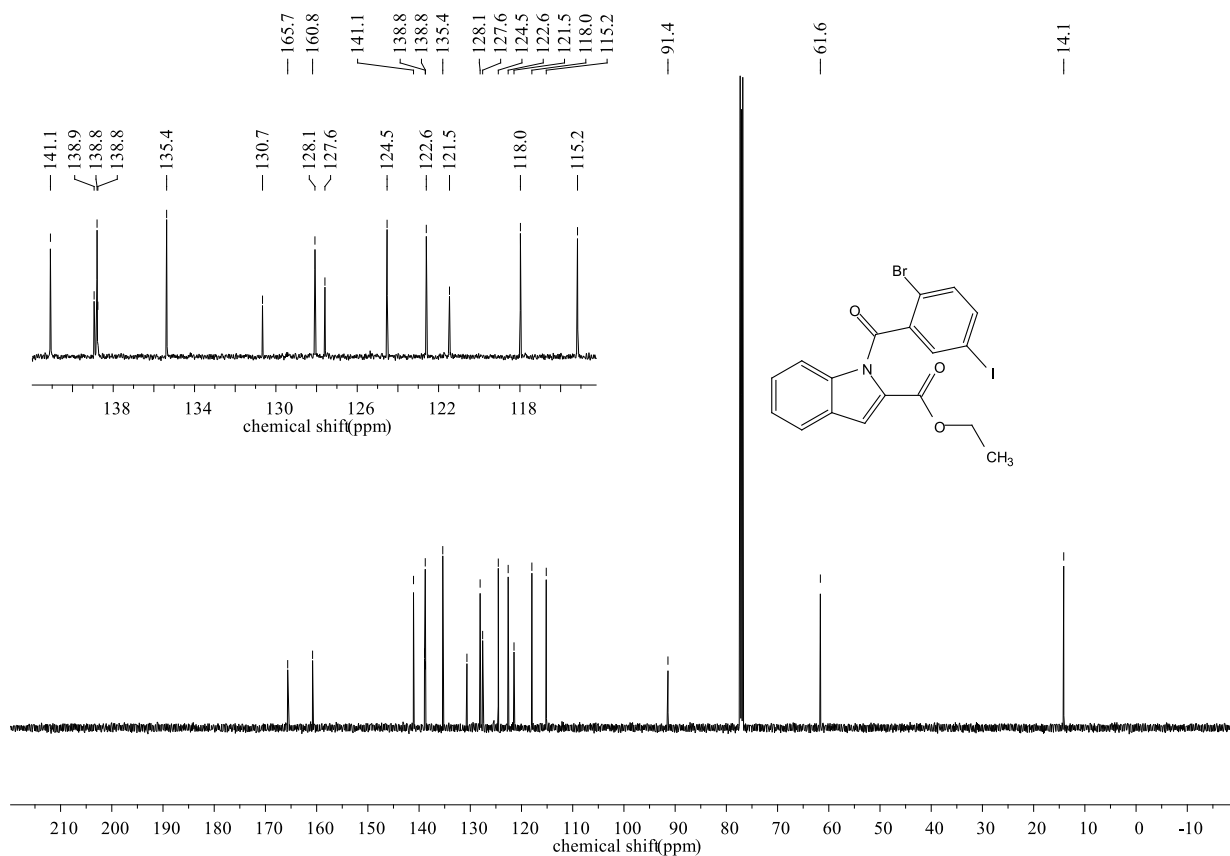

<sup>1</sup>H NMR Spectra of compound **R36** (500 MHz, CDCl<sub>3</sub>)

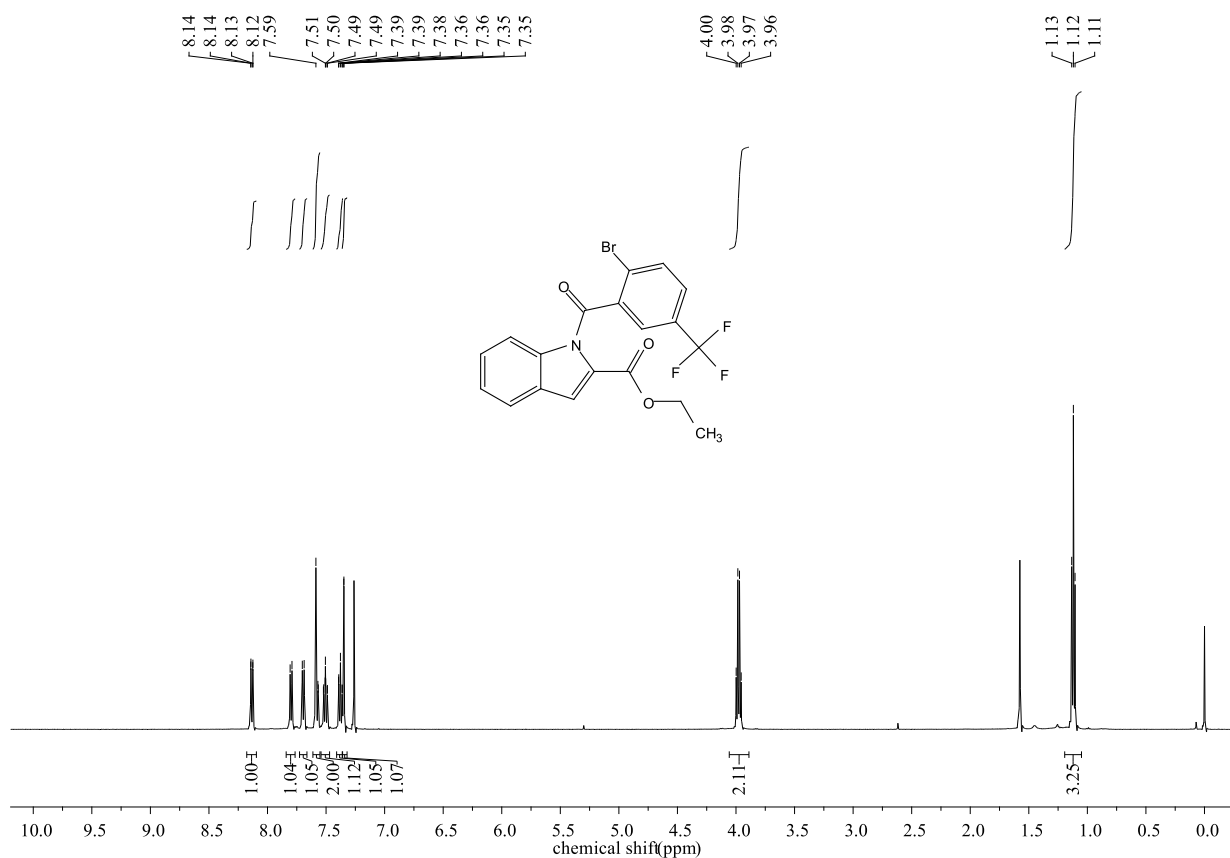

<sup>13</sup>C NMR Spectra of compound **R36** (100 MHz, CDCl<sub>3</sub>)

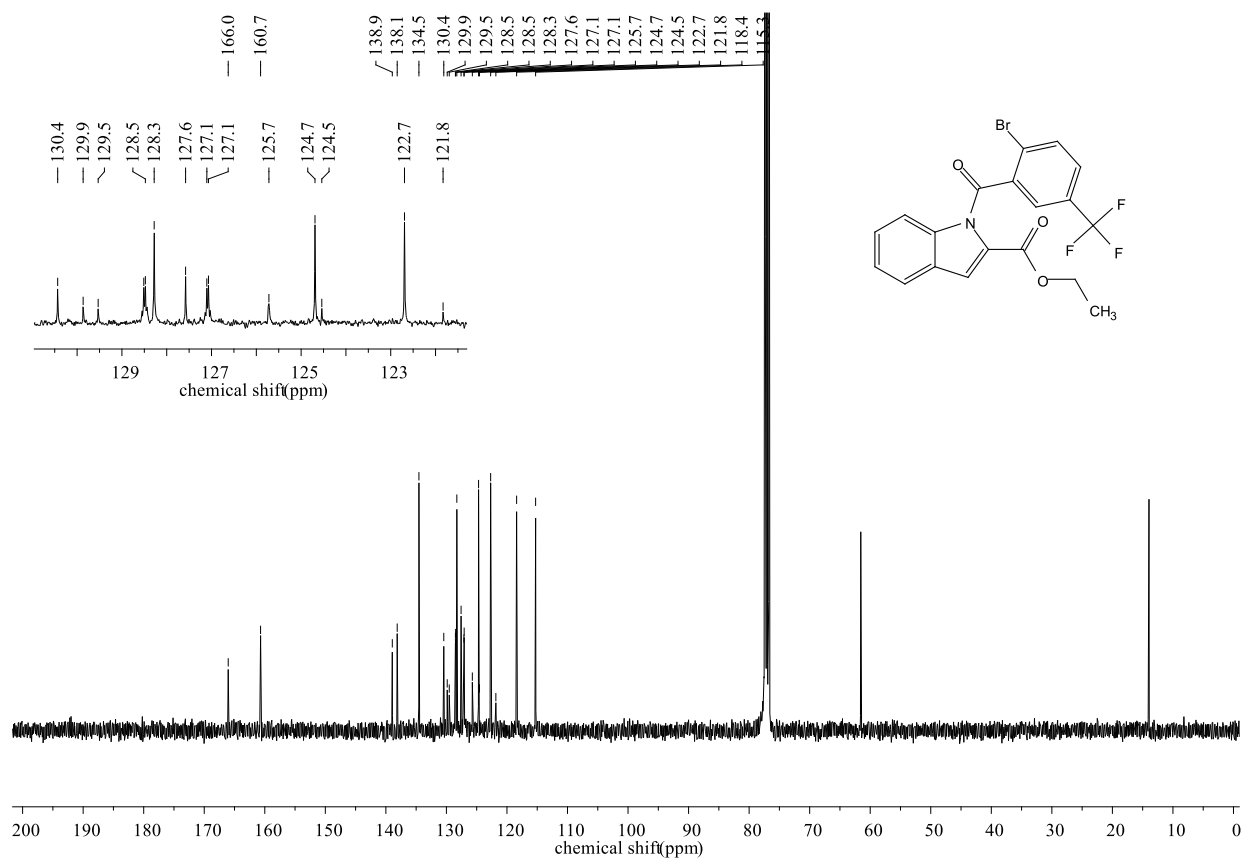

<sup>19</sup>F NMR Spectra of compound **R36** (300 MHz, CDCl<sub>3</sub>)

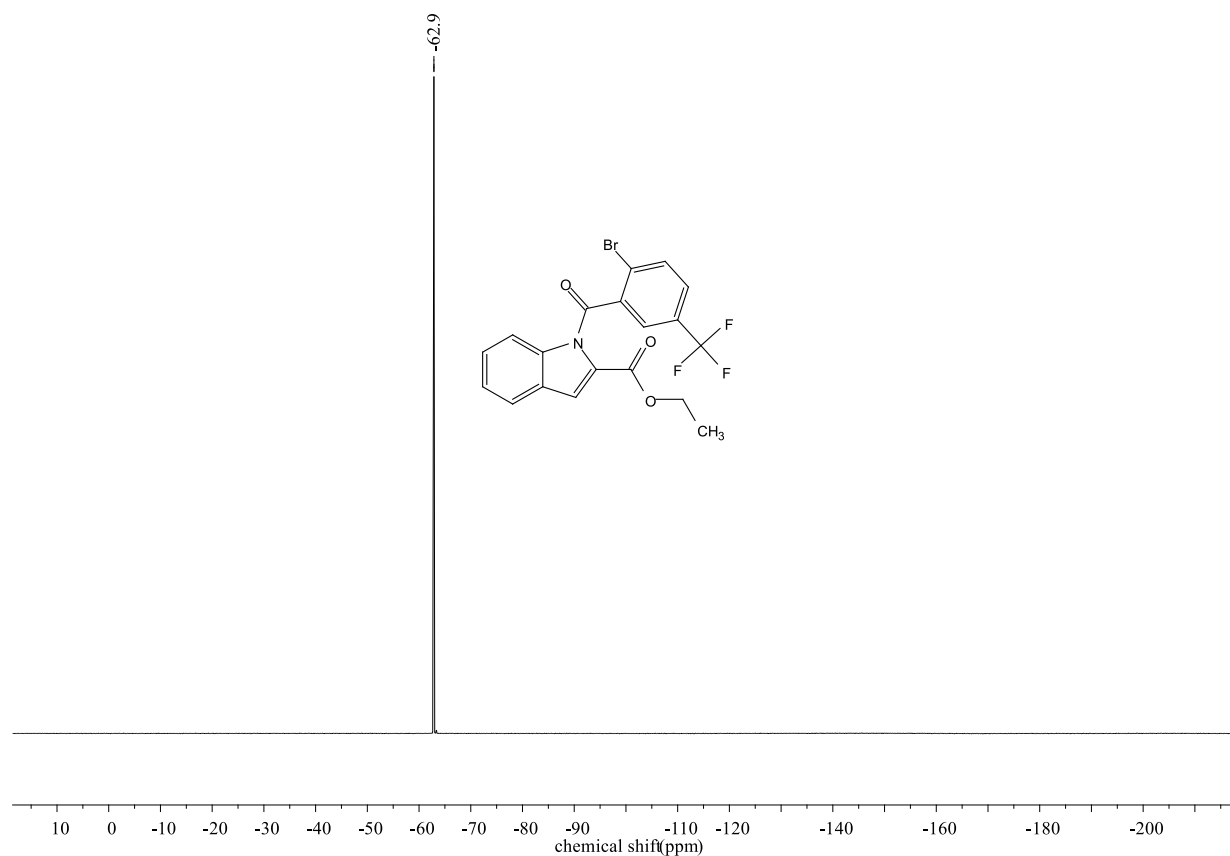

<sup>1</sup>H NMR Spectra of compound **R37** (500 MHz, CDCl<sub>3</sub>)

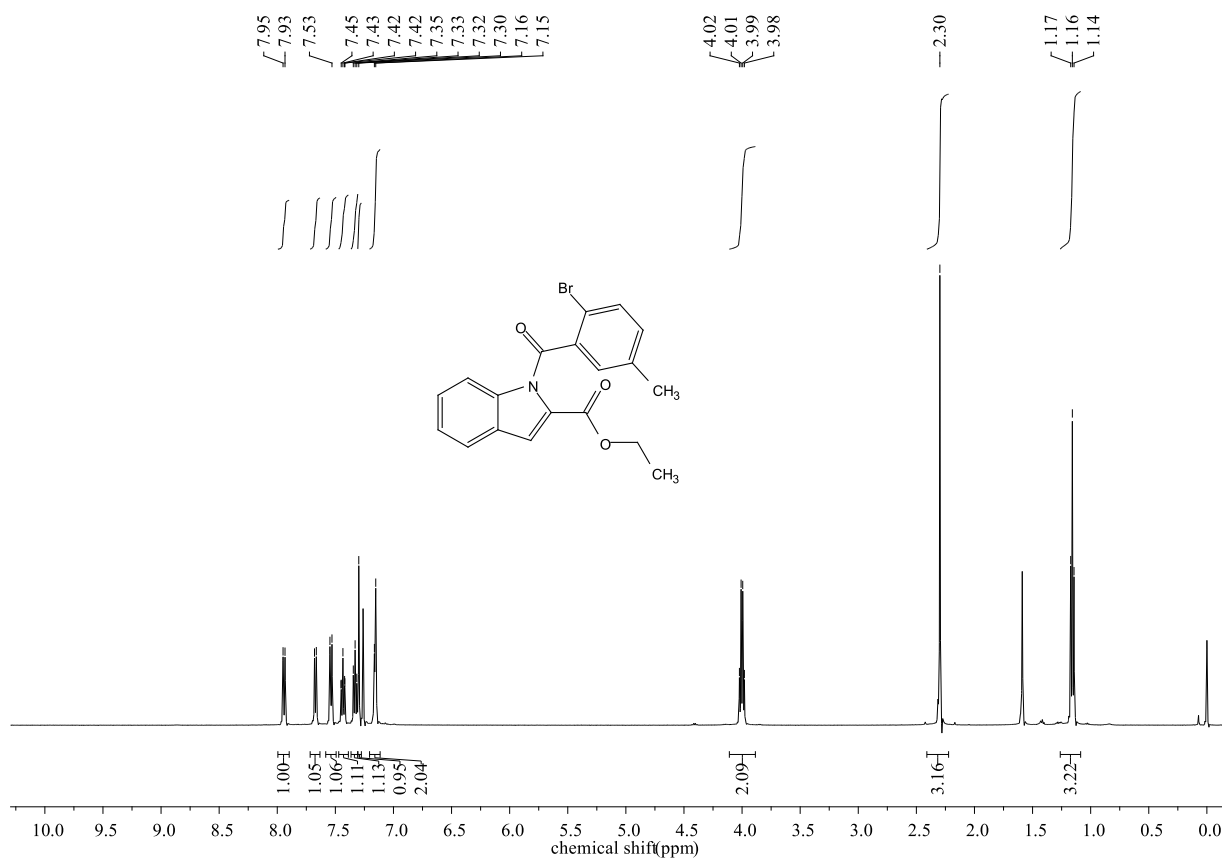

<sup>13</sup>C NMR Spectra of compound **R37** (100 MHz, CDCl<sub>3</sub>)

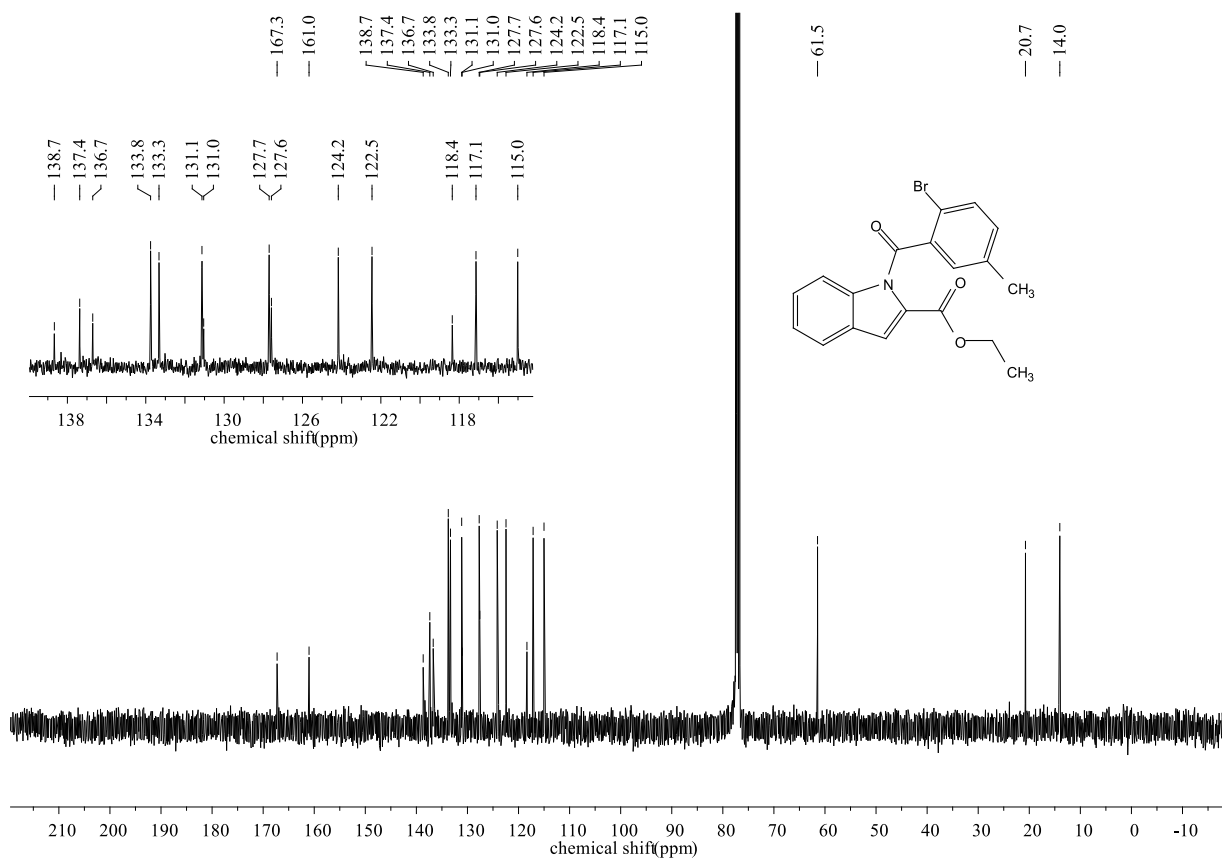

<sup>1</sup>H NMR Spectra of compound **R38** (500 MHz, CDCl<sub>3</sub>)

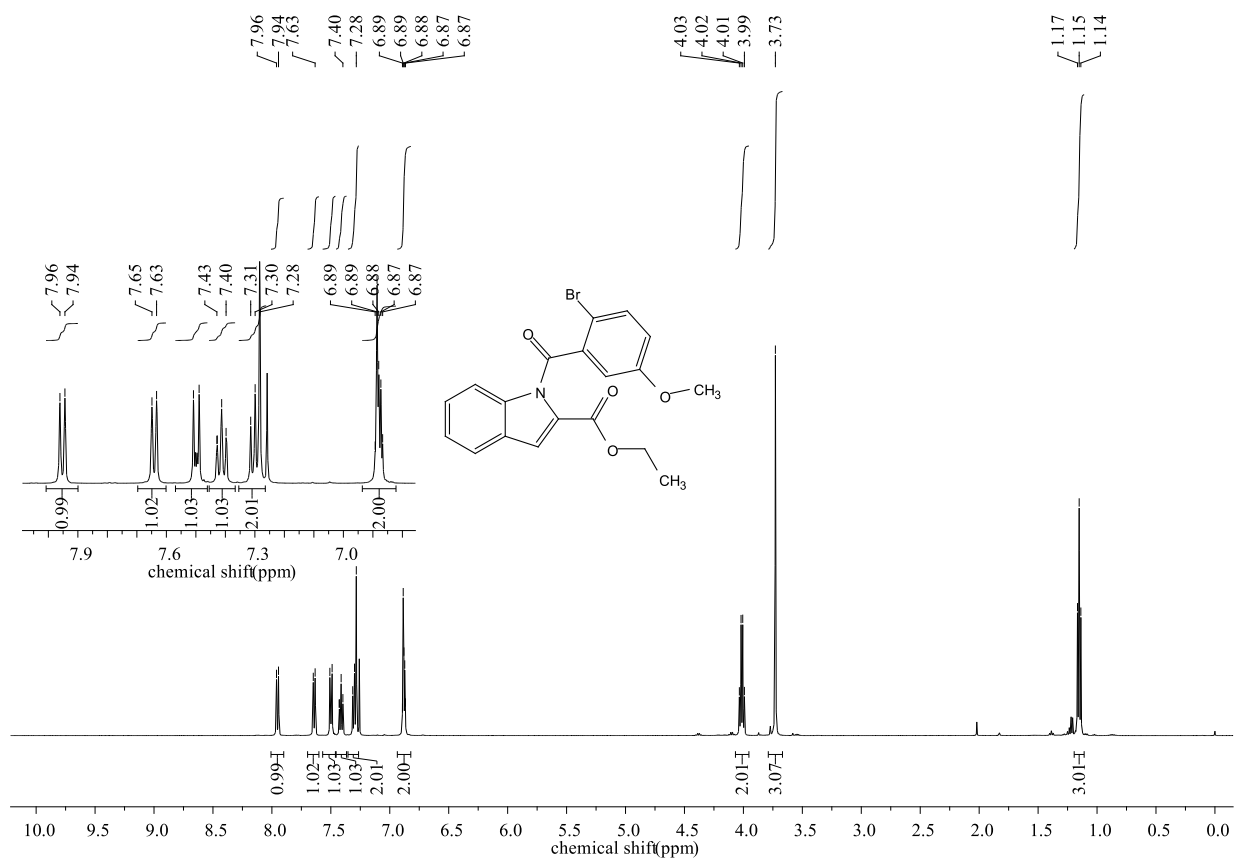

<sup>13</sup>C NMR Spectra of compound **R38** (125 MHz, CDCl<sub>3</sub>)

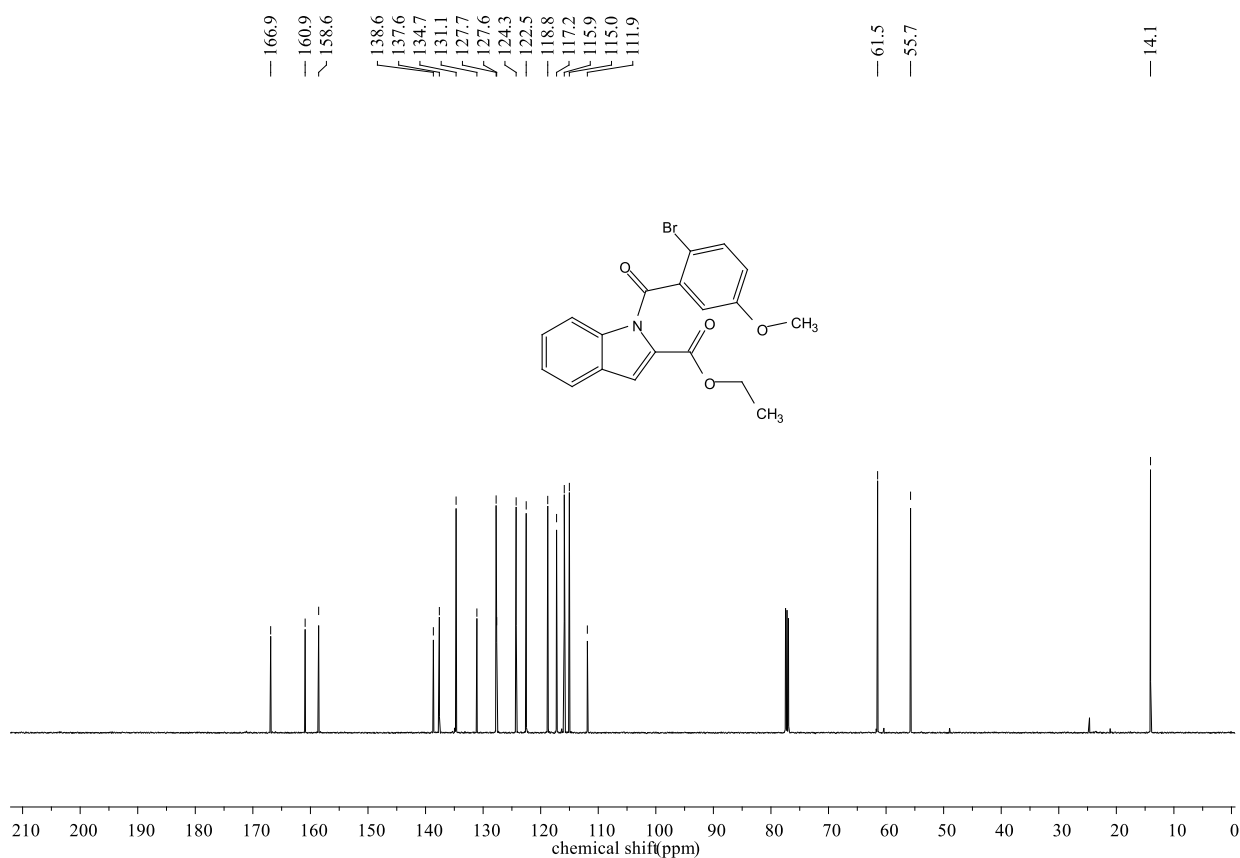

<sup>1</sup>H NMR Spectra of compound **R39** (400 MHz, CDCl<sub>3</sub>)

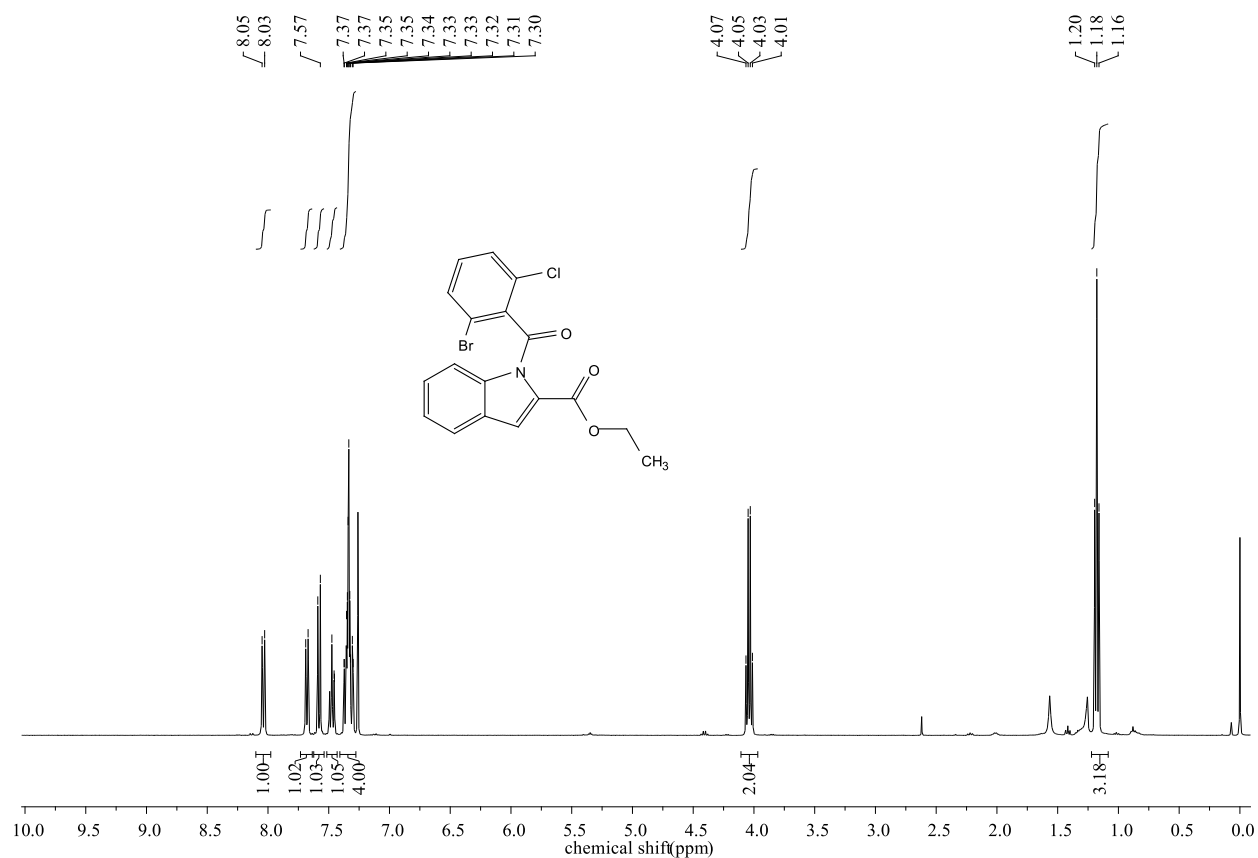

<sup>13</sup>C NMR Spectra of compound **R39** (125 MHz, CDCl<sub>3</sub>)

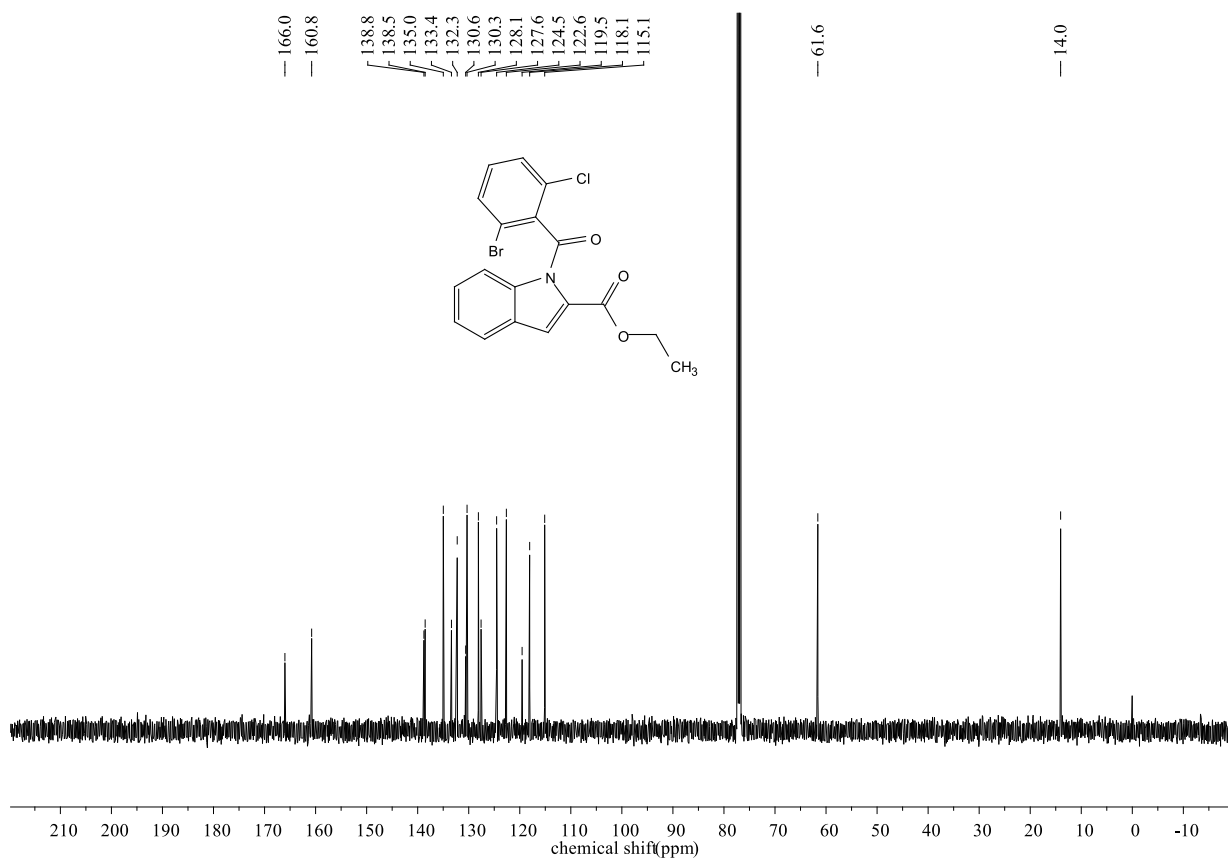

<sup>1</sup>H NMR Spectra of compound **R40** (500 MHz, CDCl<sub>3</sub>)

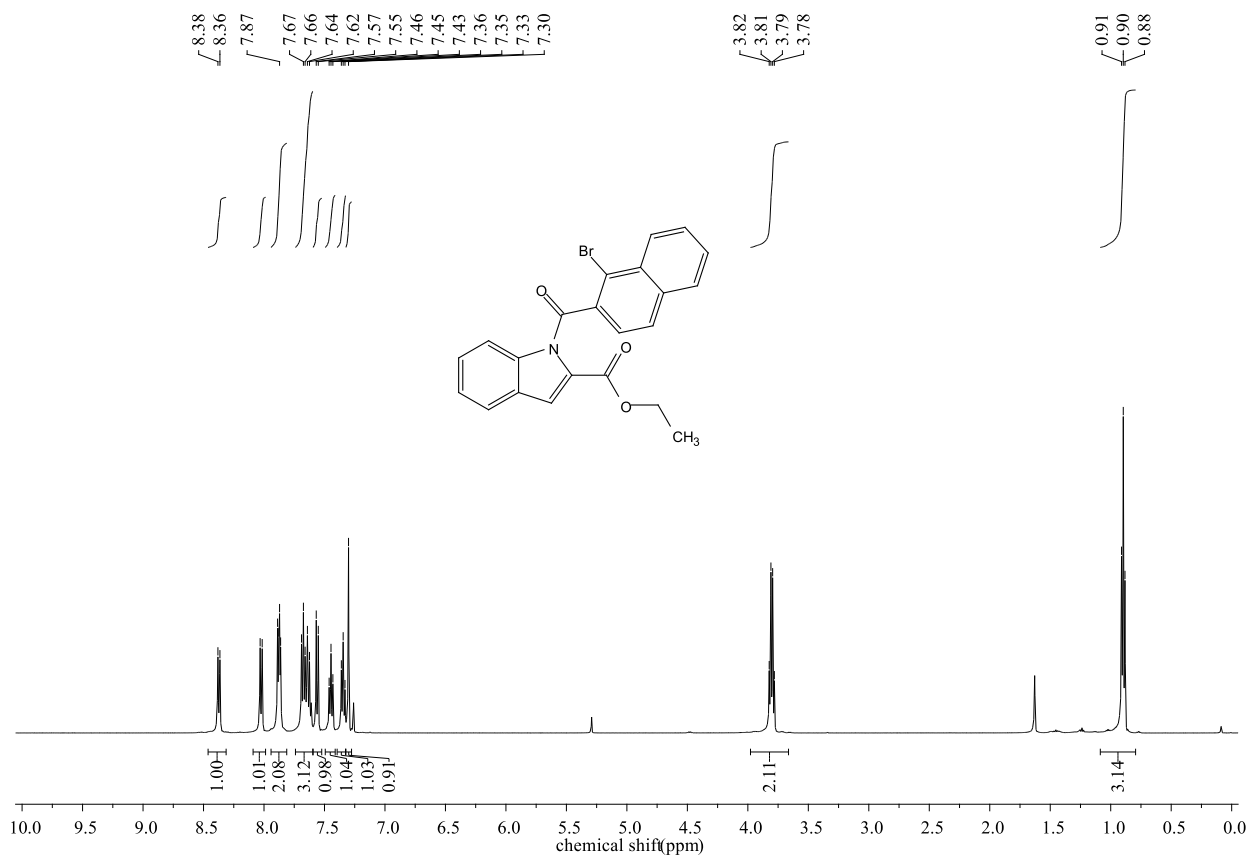

<sup>13</sup>C NMR Spectra of compound **R40** (125 MHz, CDCl<sub>3</sub>)

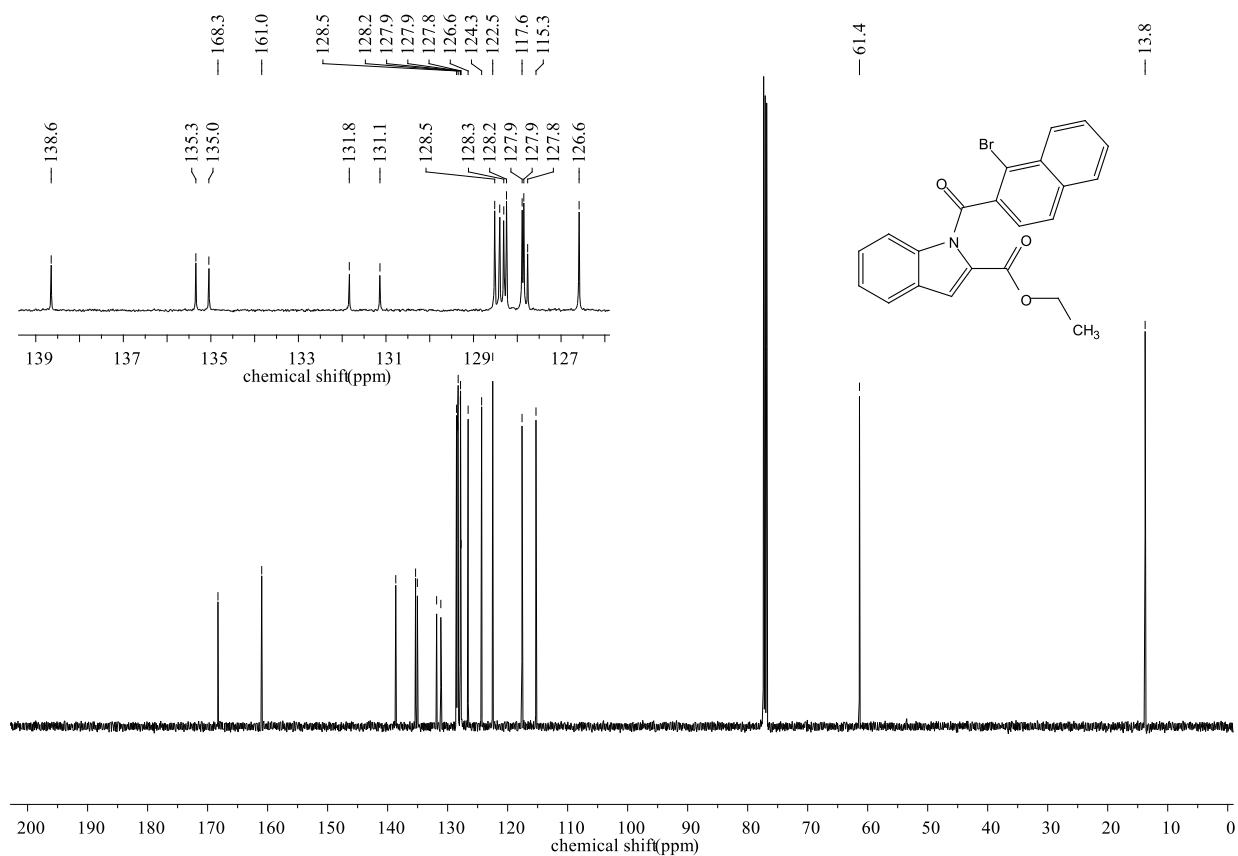

<sup>1</sup>H NMR Spectra of compound **R41** (500 MHz, CDCl<sub>3</sub>)

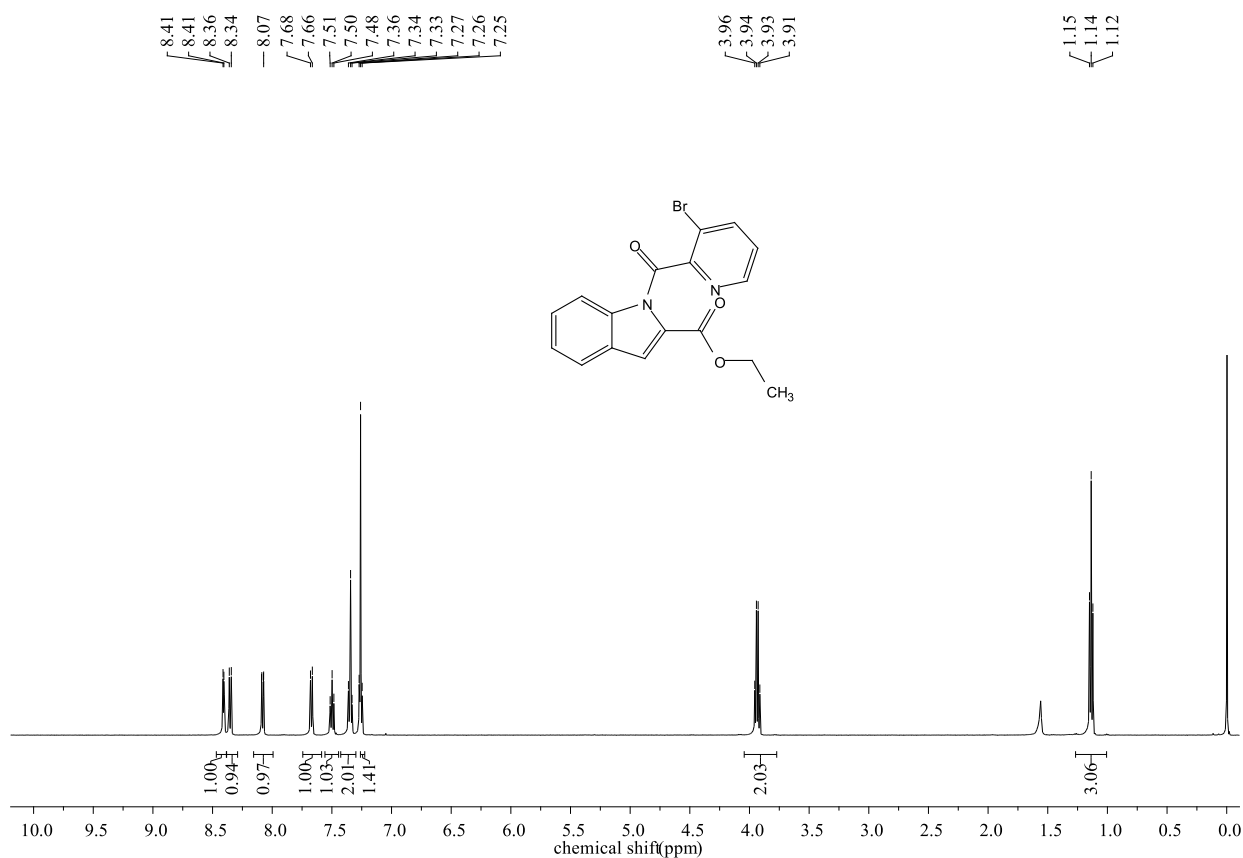

<sup>13</sup>C NMR Spectra of compound **R41** (125 MHz, CDCl<sub>3</sub>)

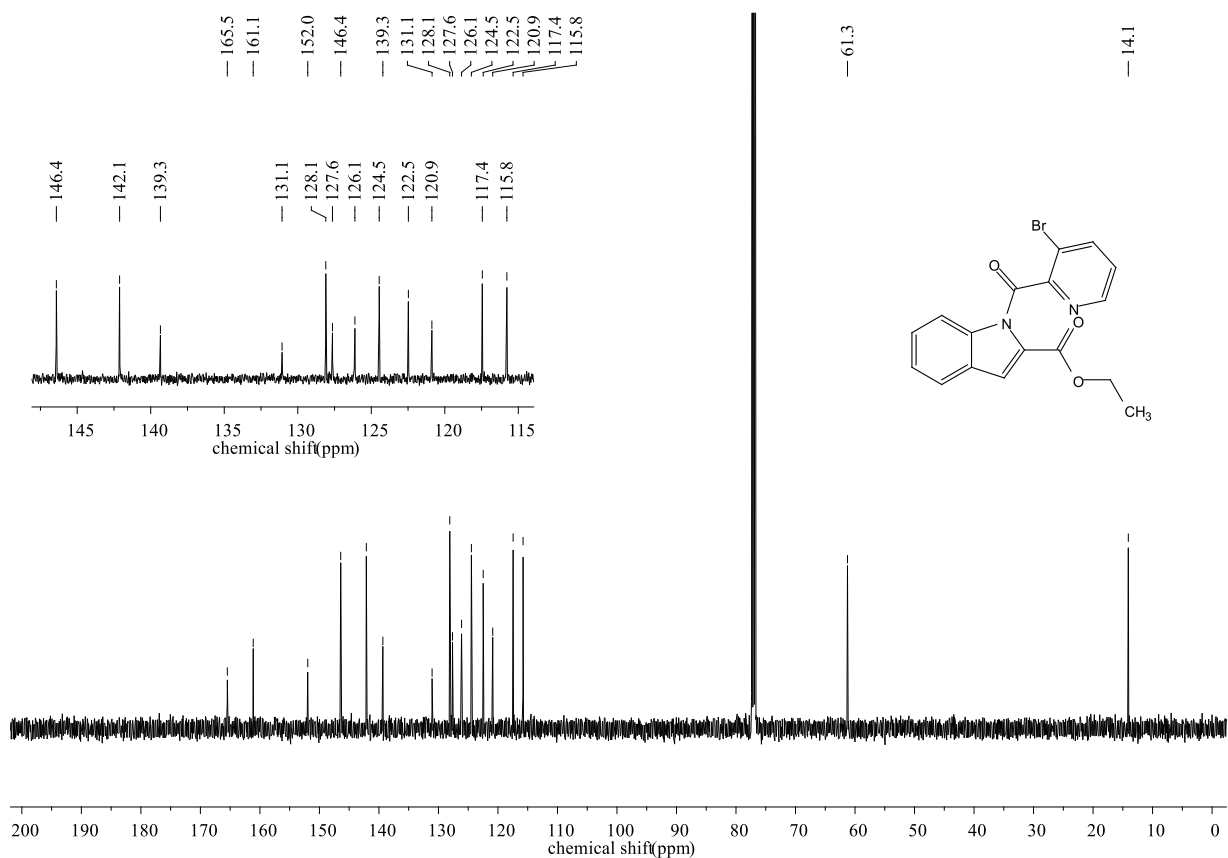

<sup>1</sup>H NMR Spectra of compound **R42** (500 MHz, CDCl<sub>3</sub>)

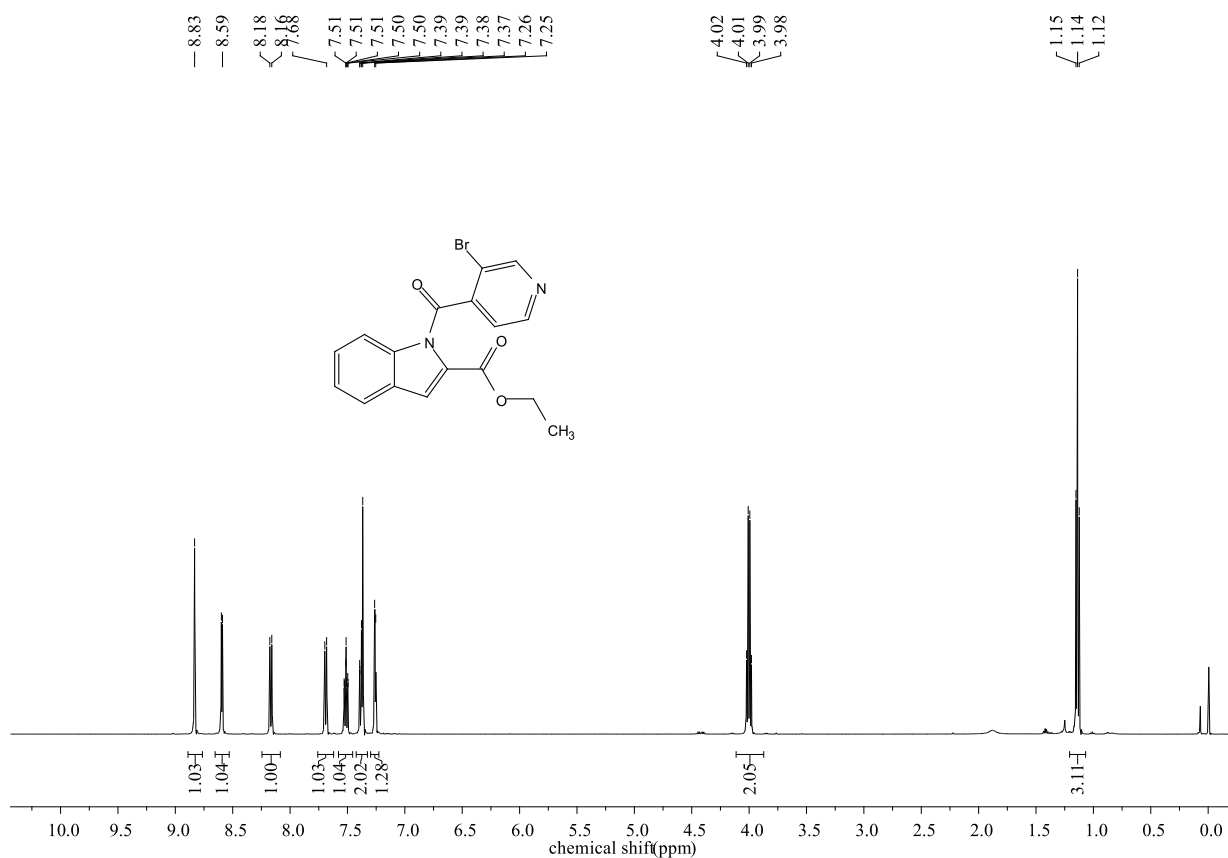

<sup>13</sup>C NMR Spectra of compound **R42** (125 MHz, CDCl<sub>3</sub>)

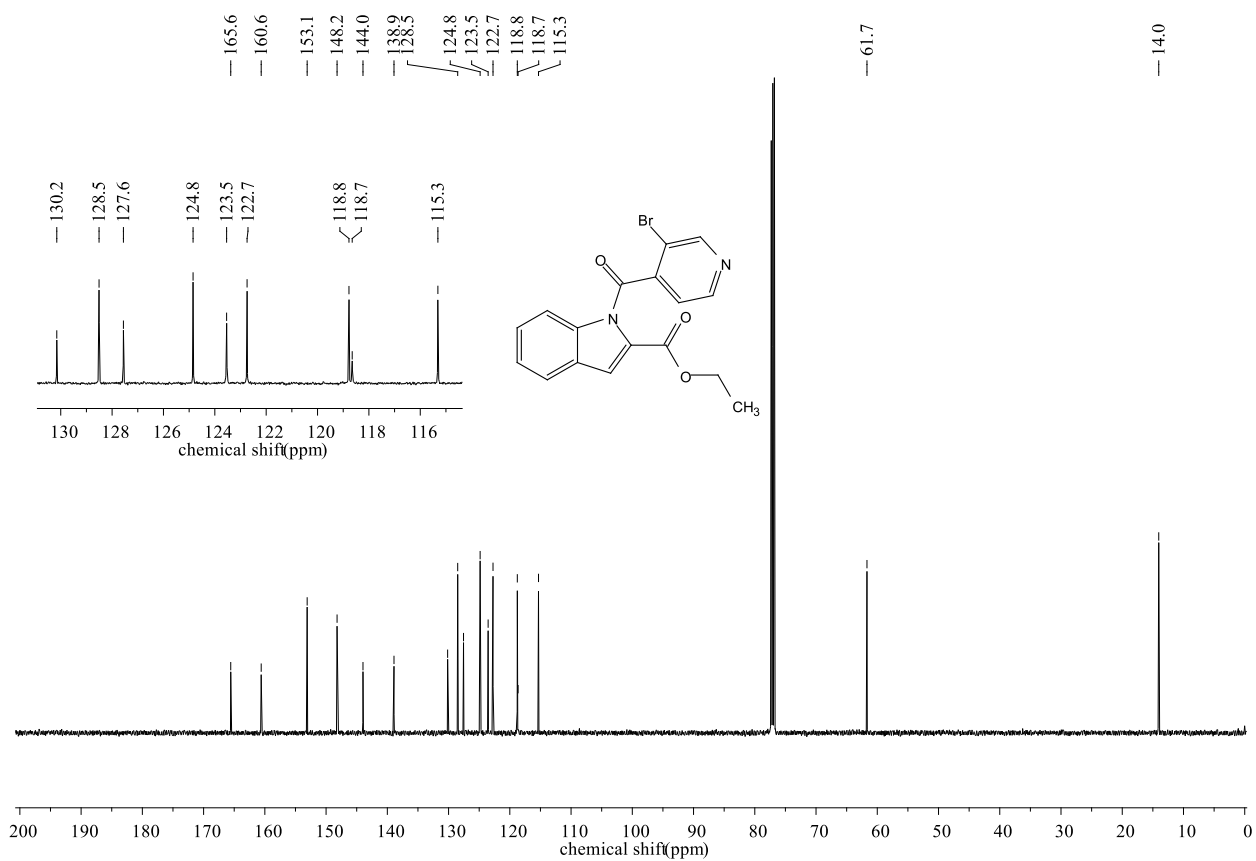

<sup>1</sup>H NMR Spectra of compound **1** (500 MHz, CDCl<sub>3</sub>)

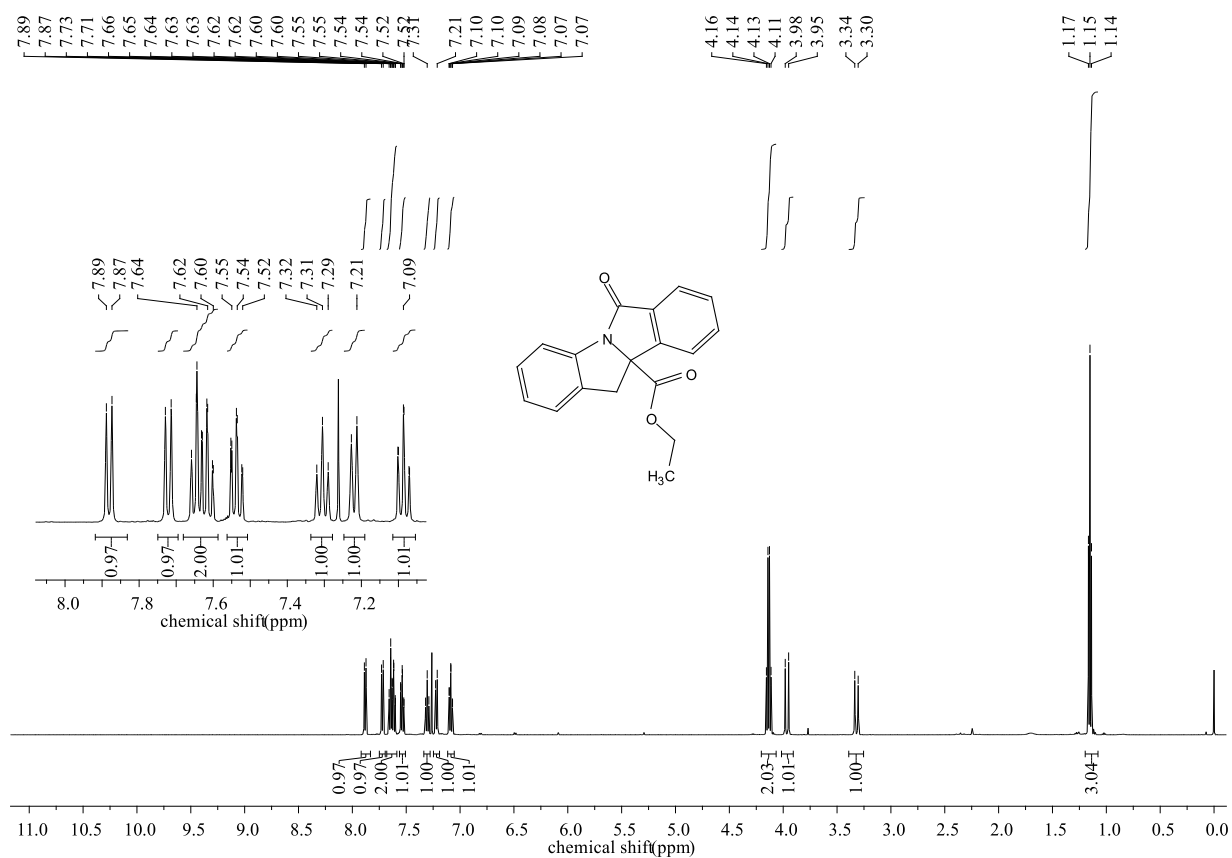

<sup>1</sup>H NMR Spectra of compound **2** (400 MHz, CDCl<sub>3</sub>)

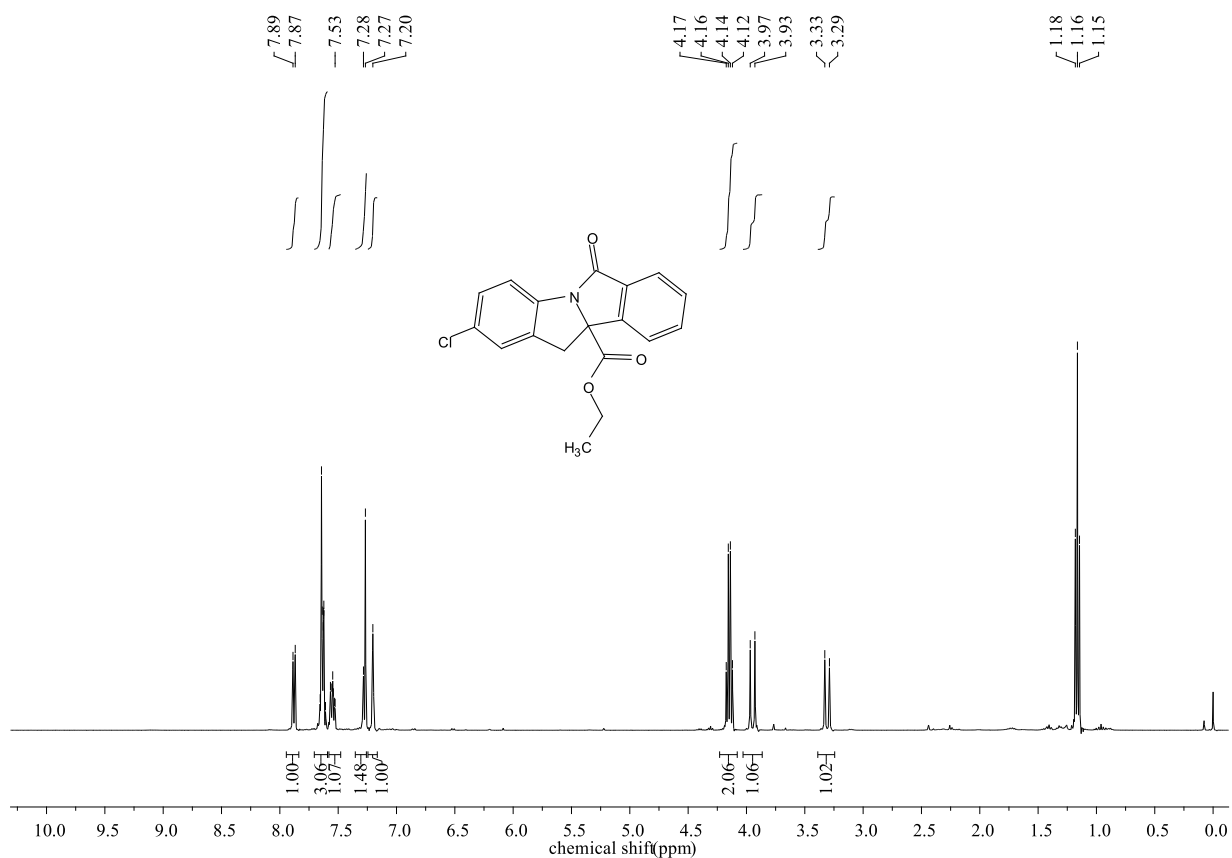

<sup>13</sup>C NMR Spectra of compound **2** (100 MHz, CDCl<sub>3</sub>)

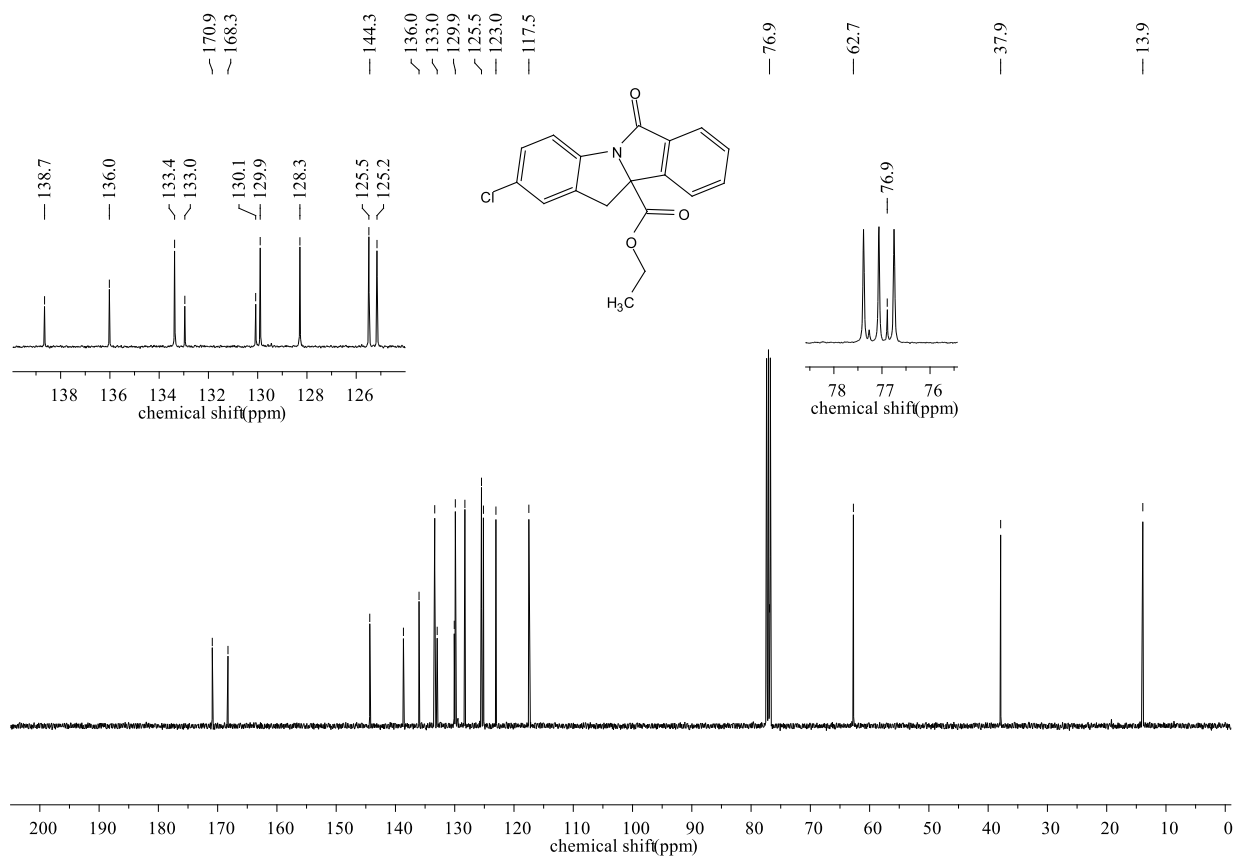

<sup>1</sup>H NMR Spectra of compound **3** (400 MHz, CDCl<sub>3</sub>)

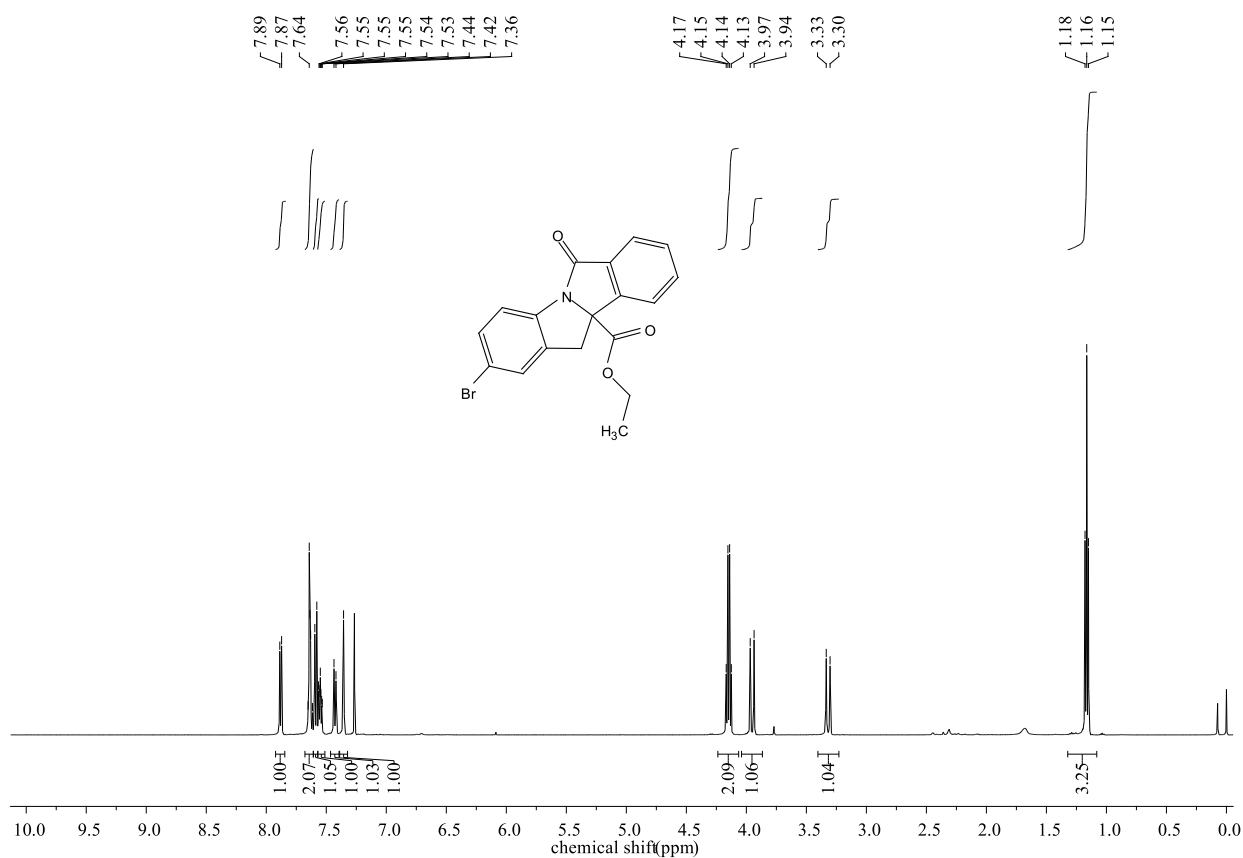

<sup>13</sup>C NMR Spectra of compound **3** (125 MHz, CDCl<sub>3</sub>)

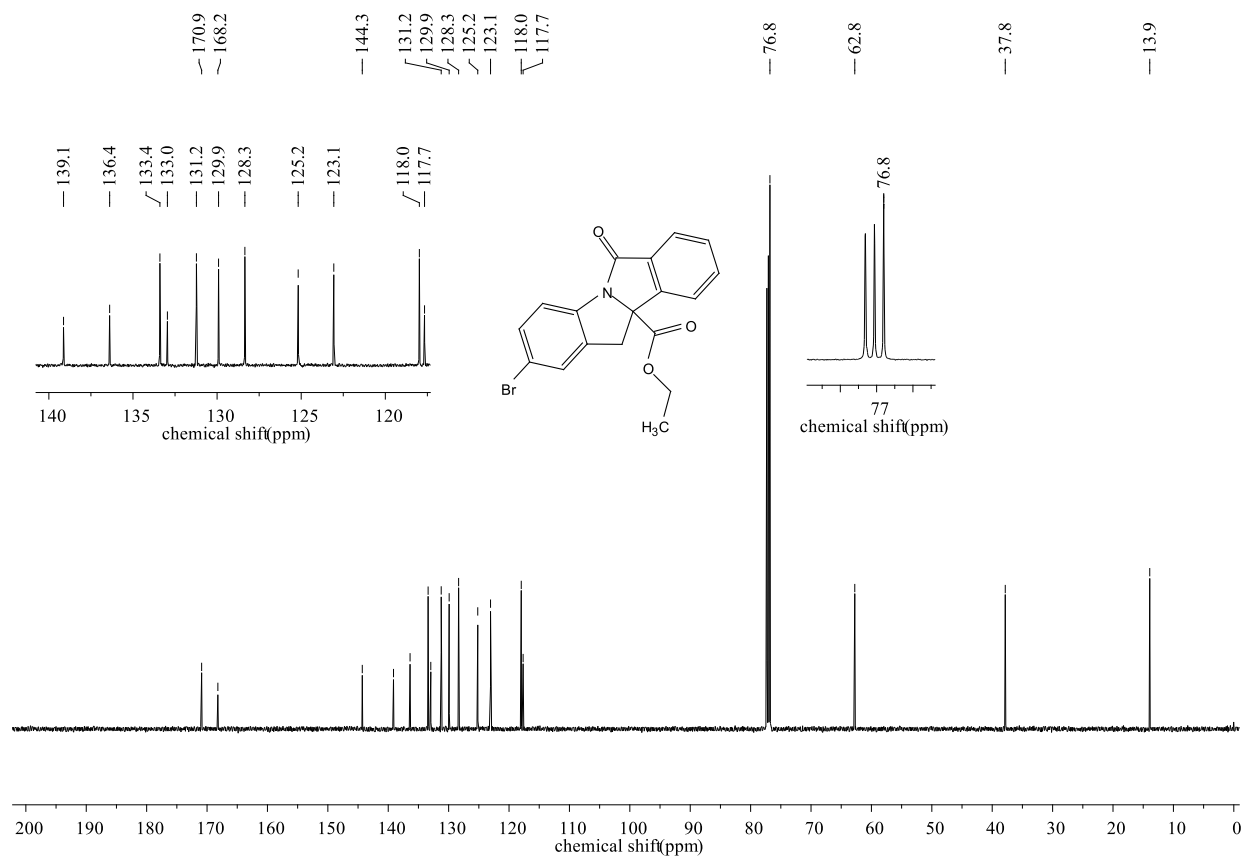

<sup>1</sup>H NMR Spectra of compound **4** (400 MHz, CDCl<sub>3</sub>)

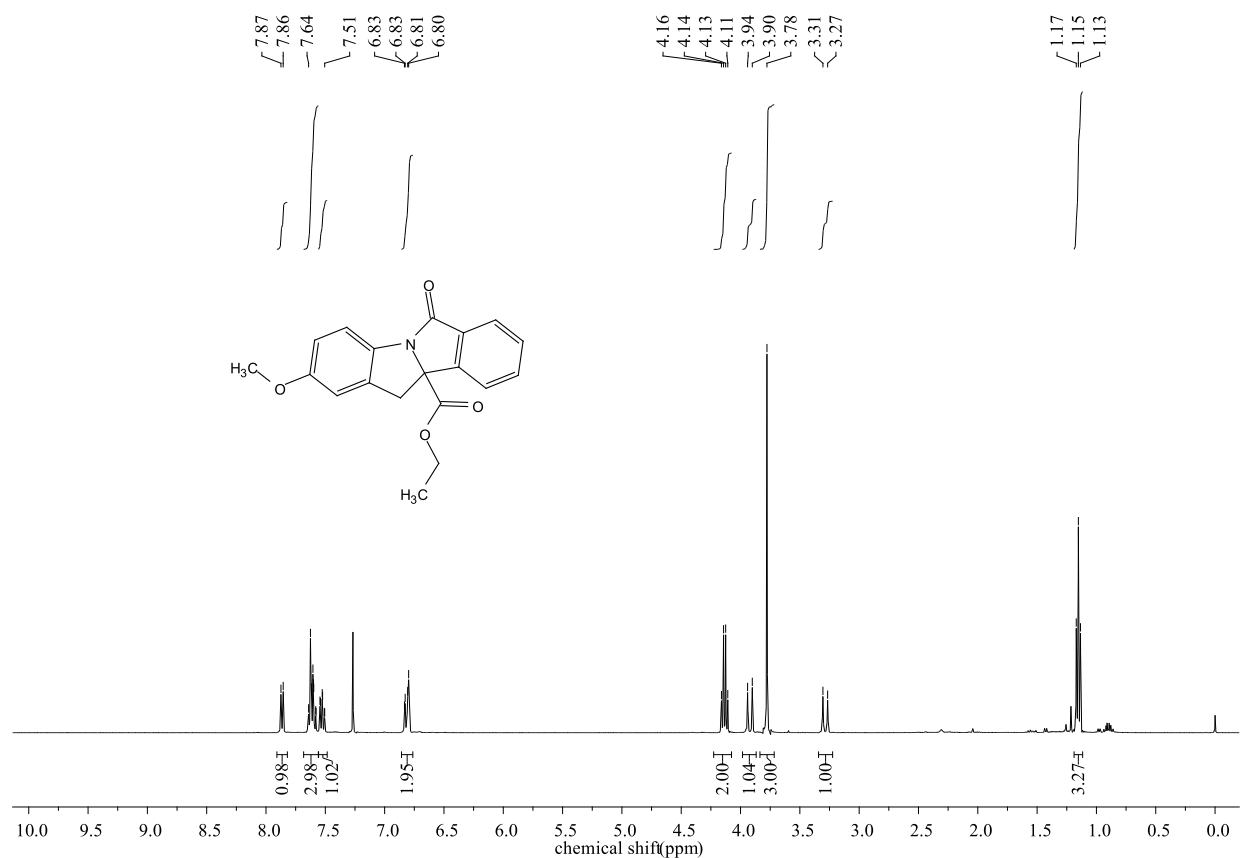

<sup>13</sup>C NMR Spectra of compound **4** (100 MHz, CDCl<sub>3</sub>)

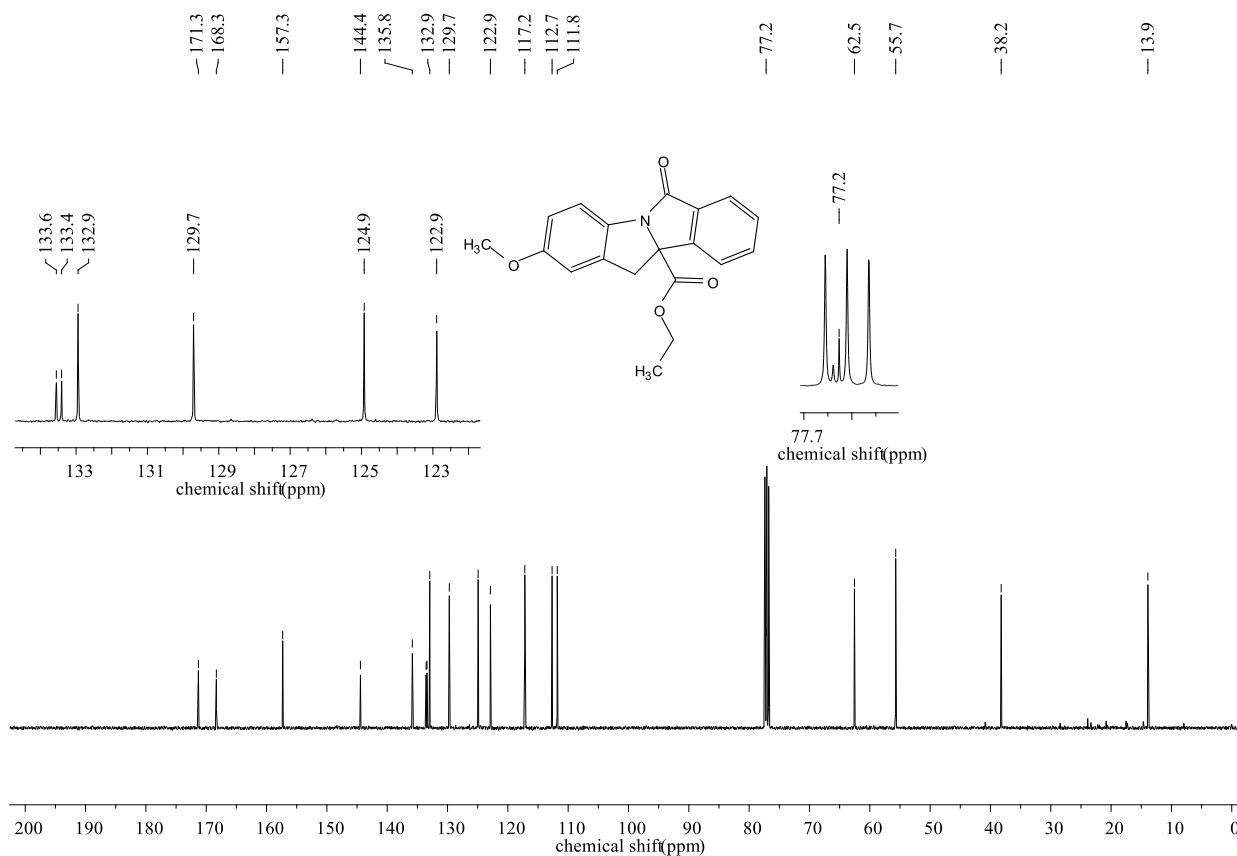

<sup>1</sup>H NMR Spectra of compound **5** (500 MHz, CDCl<sub>3</sub>)

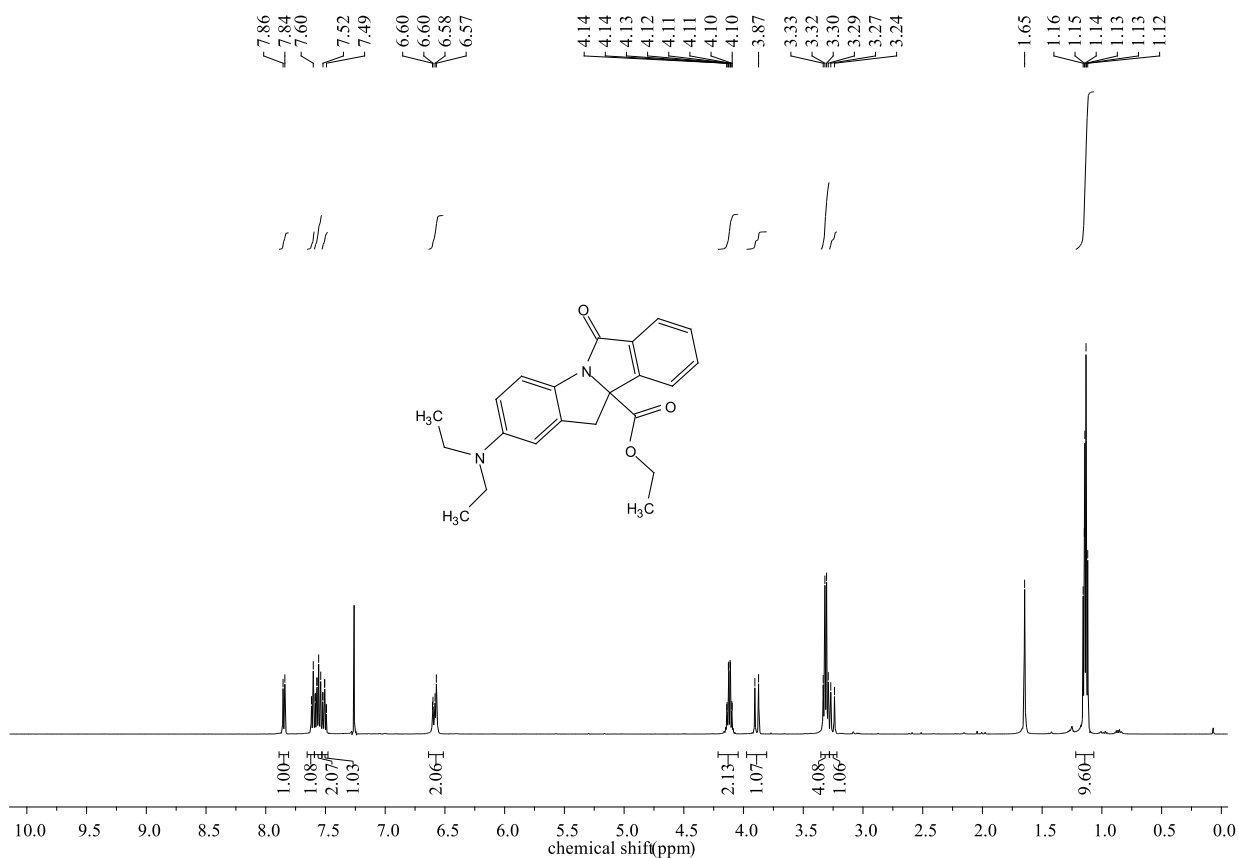

<sup>13</sup>C NMR Spectra of compound **5** (100 MHz, CDCl<sub>3</sub>)

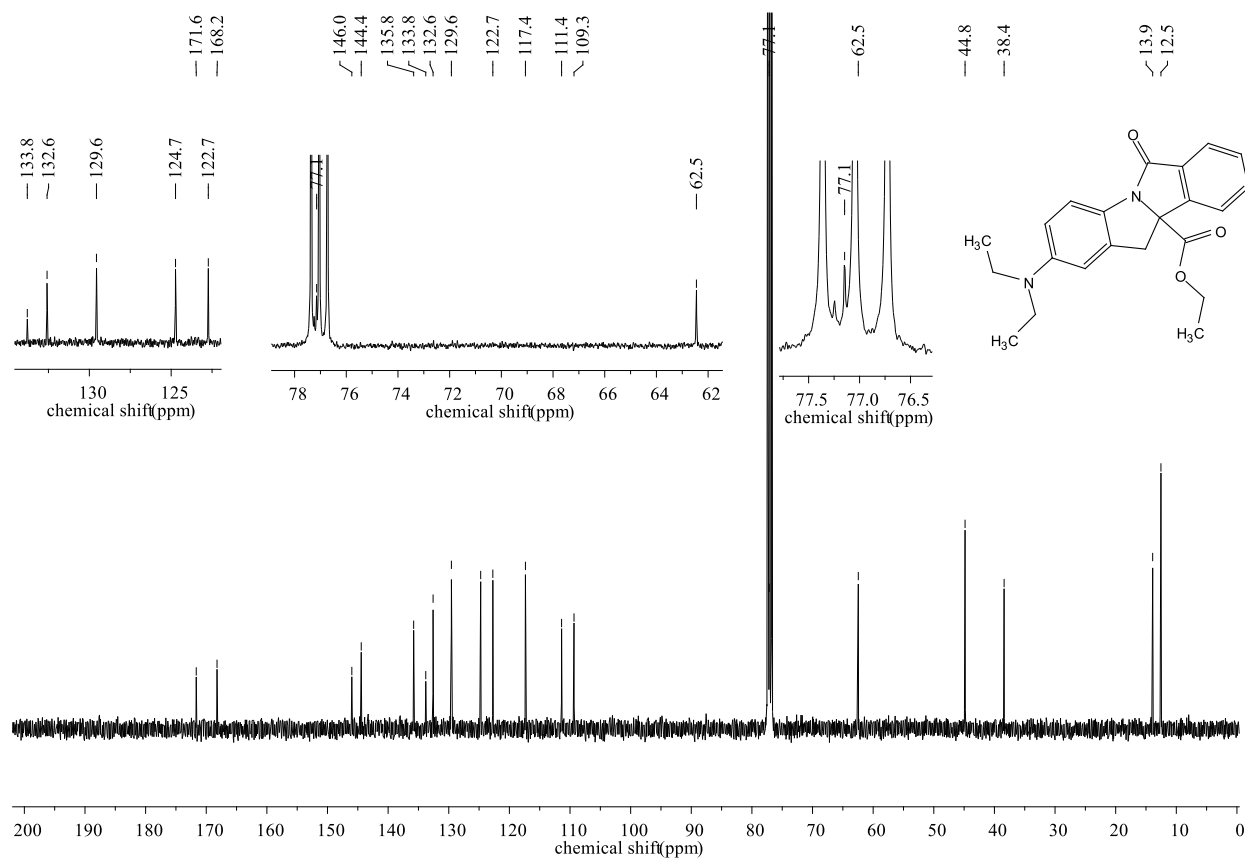

<sup>1</sup>H NMR Spectra of compound **6** (500 MHz, CDCl<sub>3</sub>)

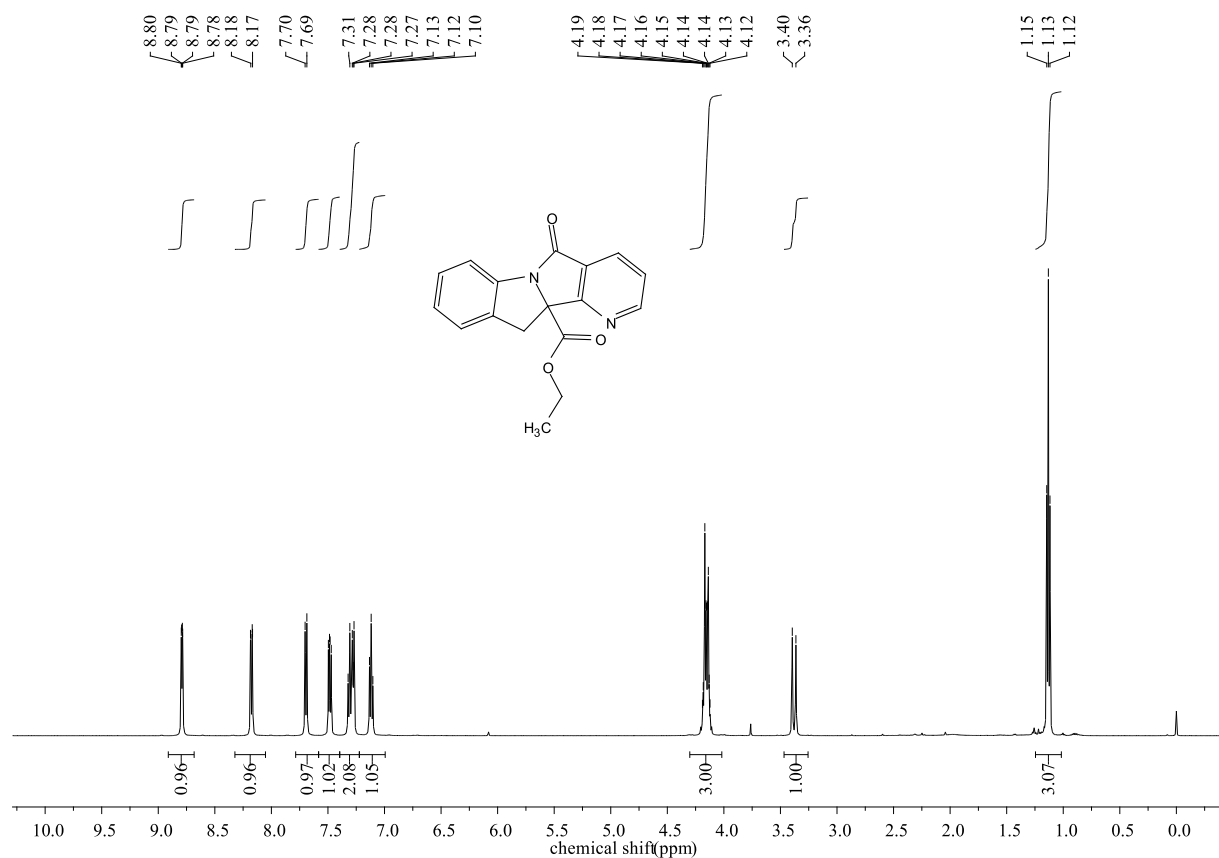

<sup>13</sup>C NMR Spectra of compound **6** (125 MHz, CDCl<sub>3</sub>)

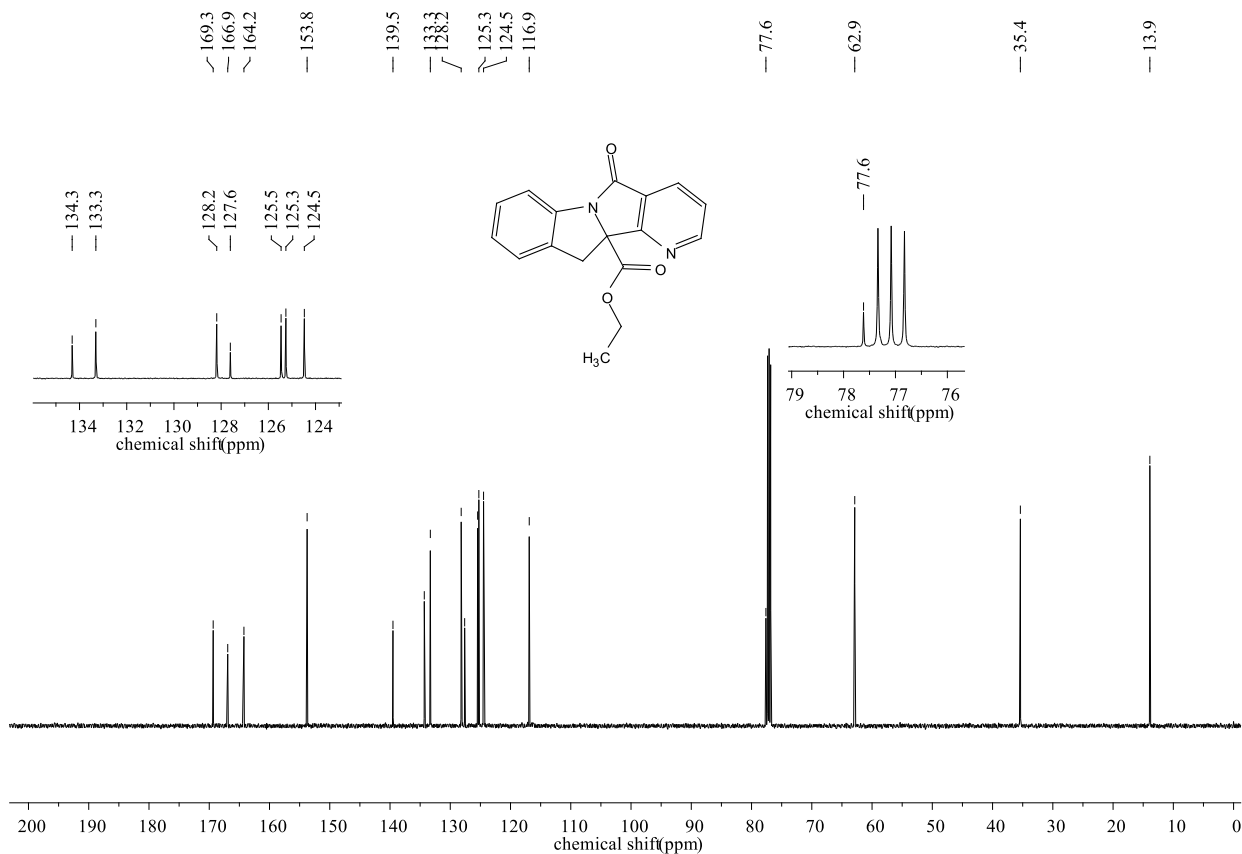

### <sup>1</sup>H NMR Spectra of compound **7** (500 MHz, CDCl<sub>3</sub>)

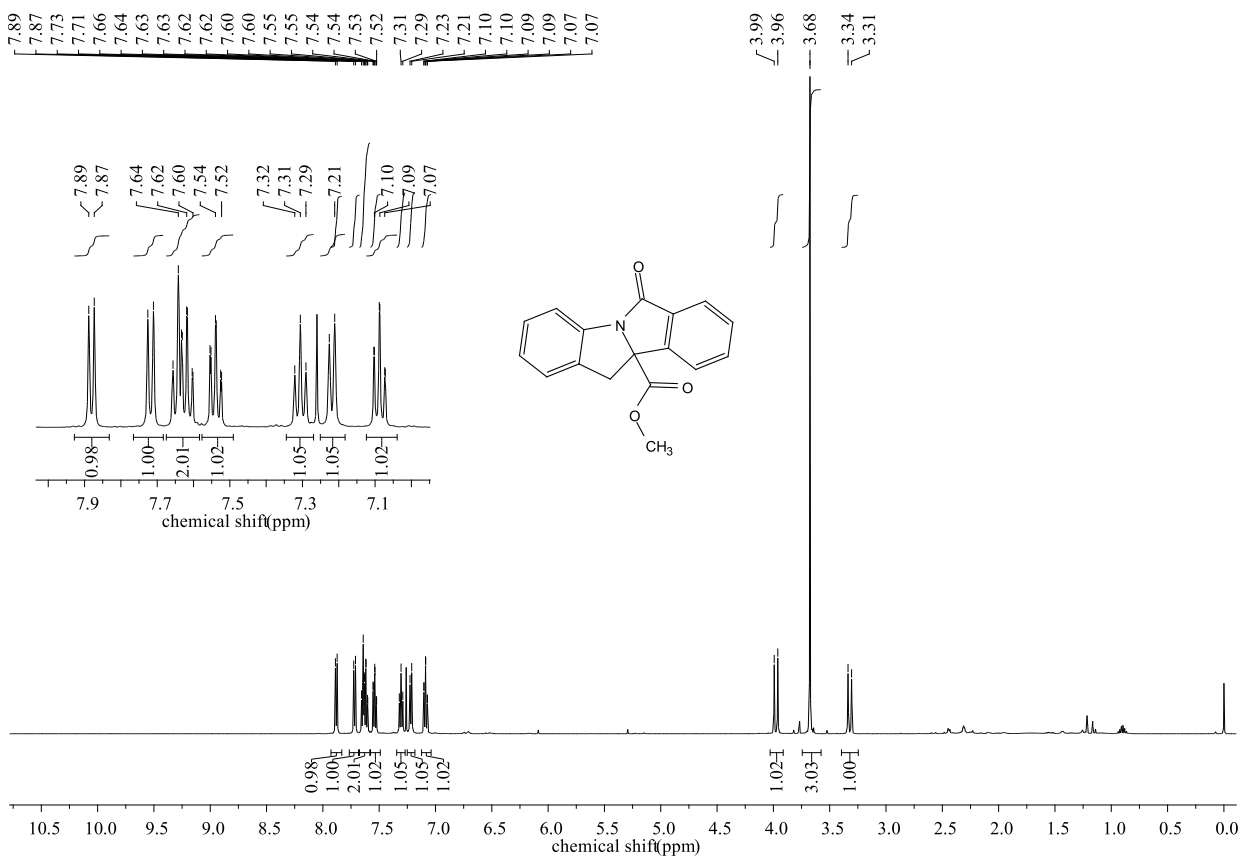

<sup>13</sup>C NMR Spectra of compound **7** (125 MHz, CDCl<sub>3</sub>)

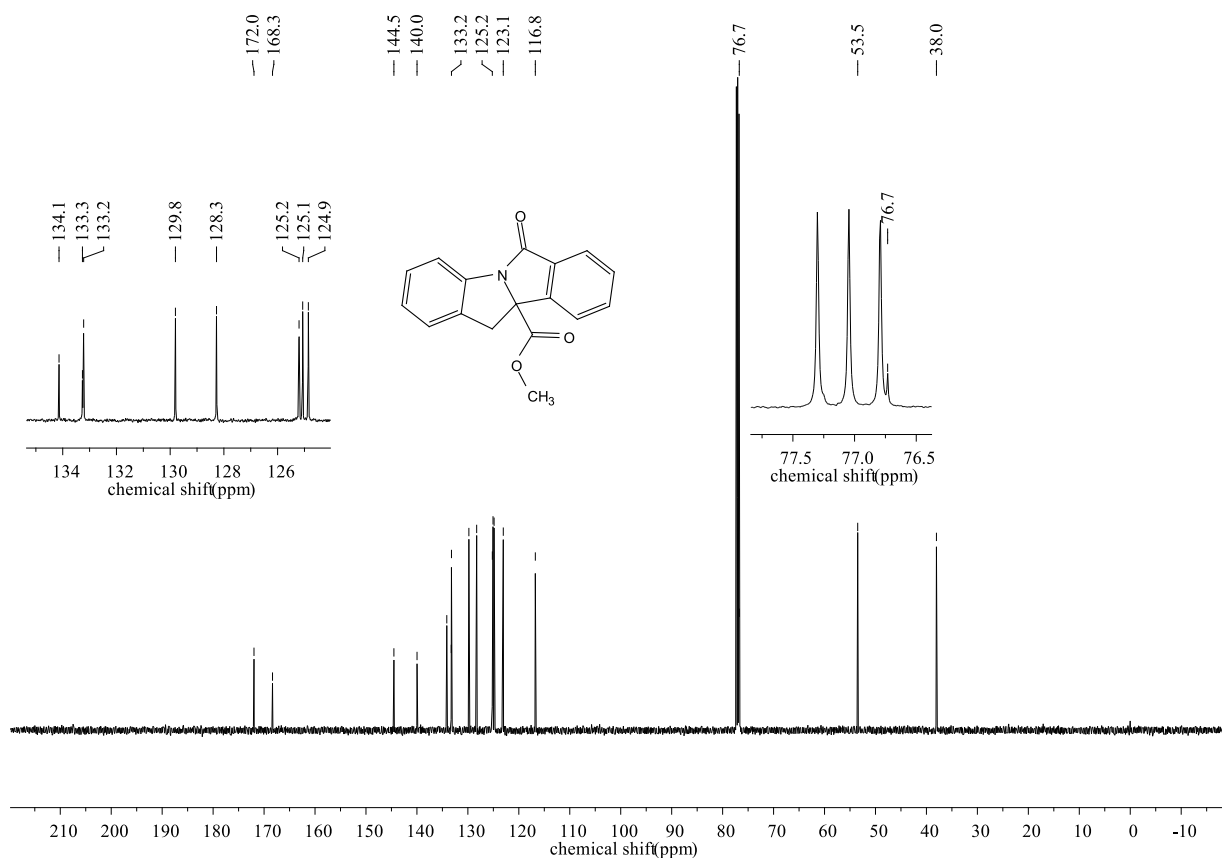

<sup>1</sup>H NMR Spectra of compound **8** (500 MHz, CDCl<sub>3</sub>)

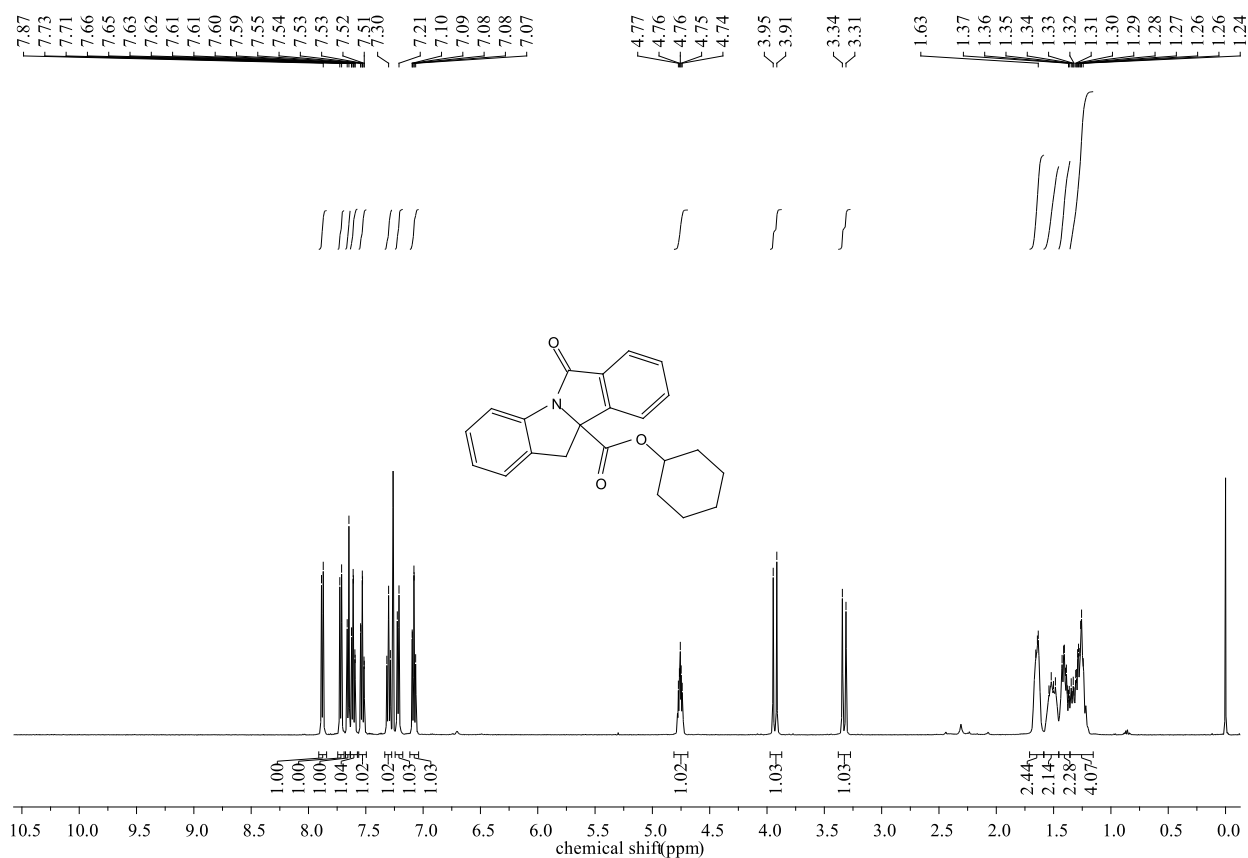

<sup>13</sup>C NMR Spectra of compound **8** (125 MHz, CDCl<sub>3</sub>)

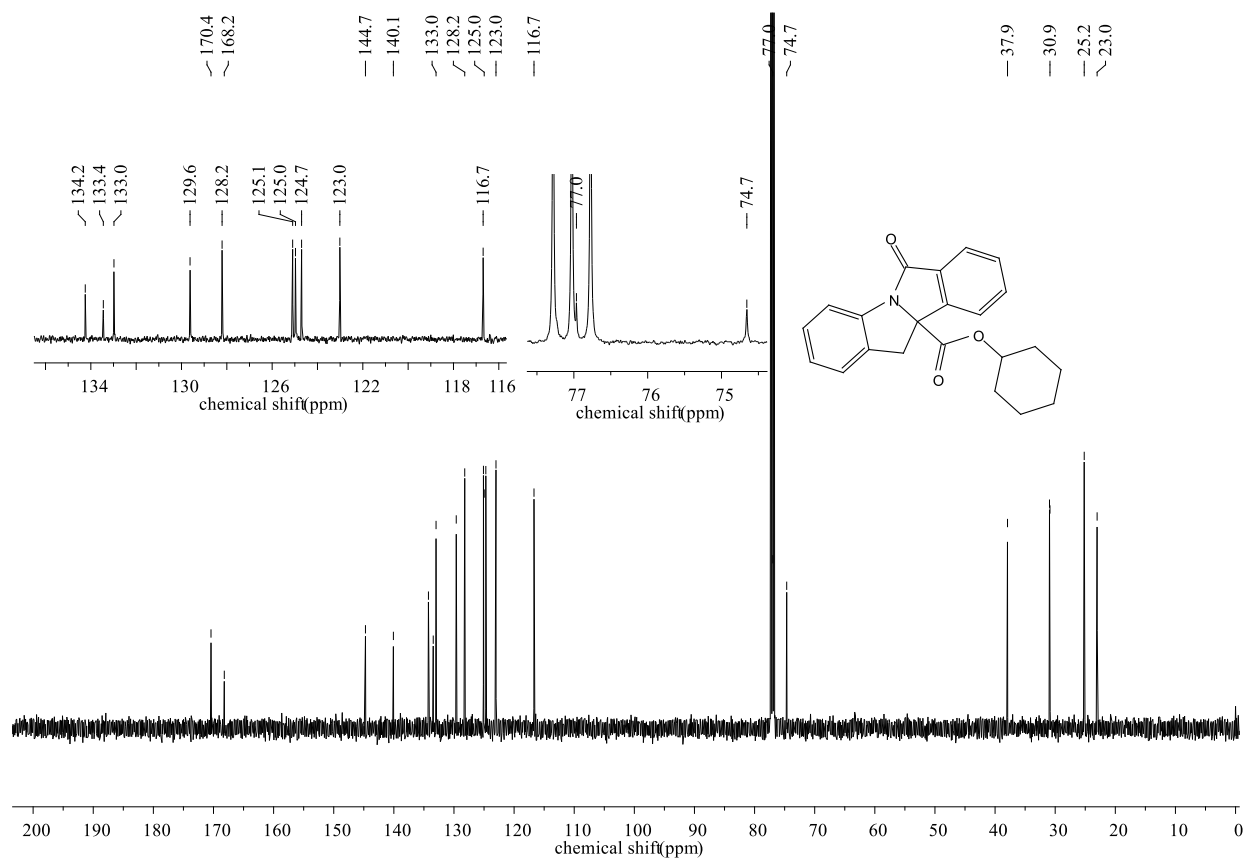

<sup>1</sup>H NMR Spectra of compound **9** (500 MHz, CDCl<sub>3</sub>)

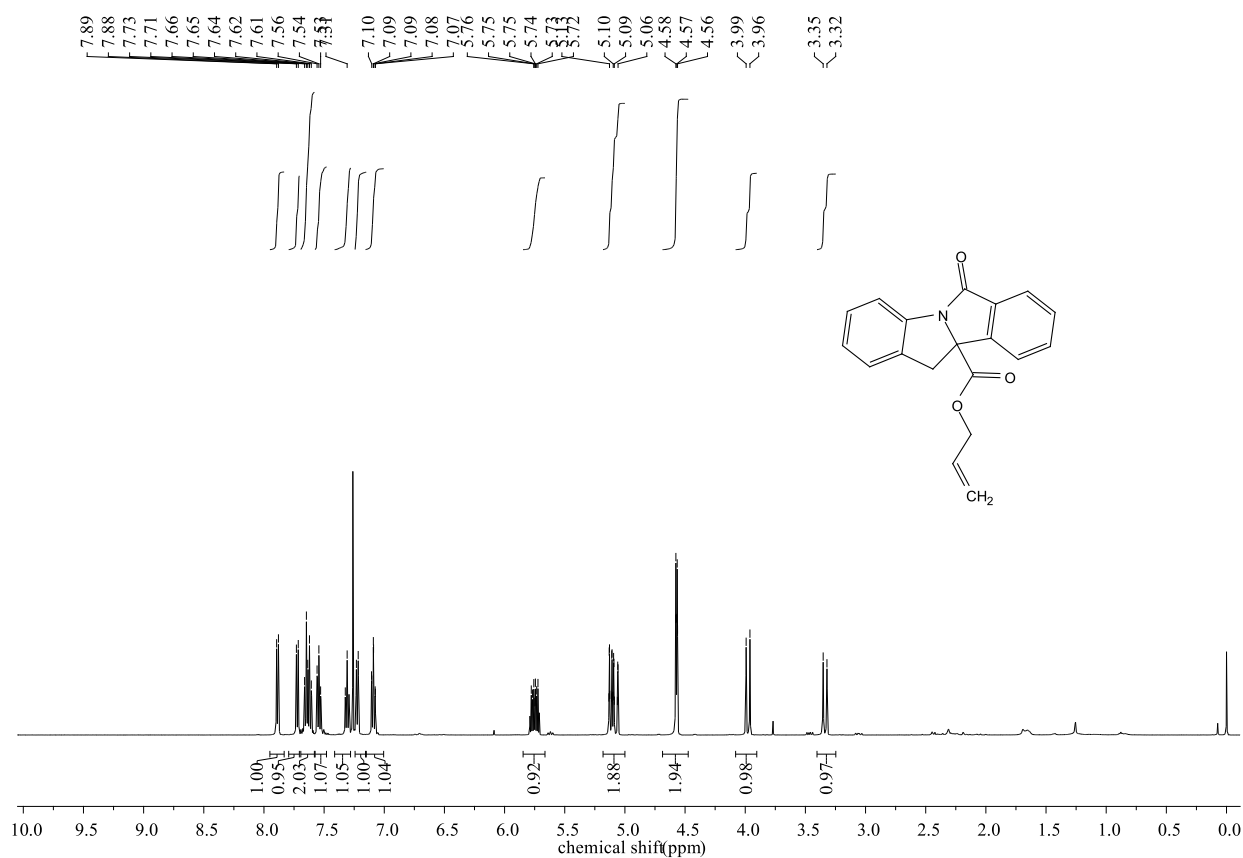

<sup>13</sup>C NMR Spectra of compound **9** (125 MHz, CDCl<sub>3</sub>)

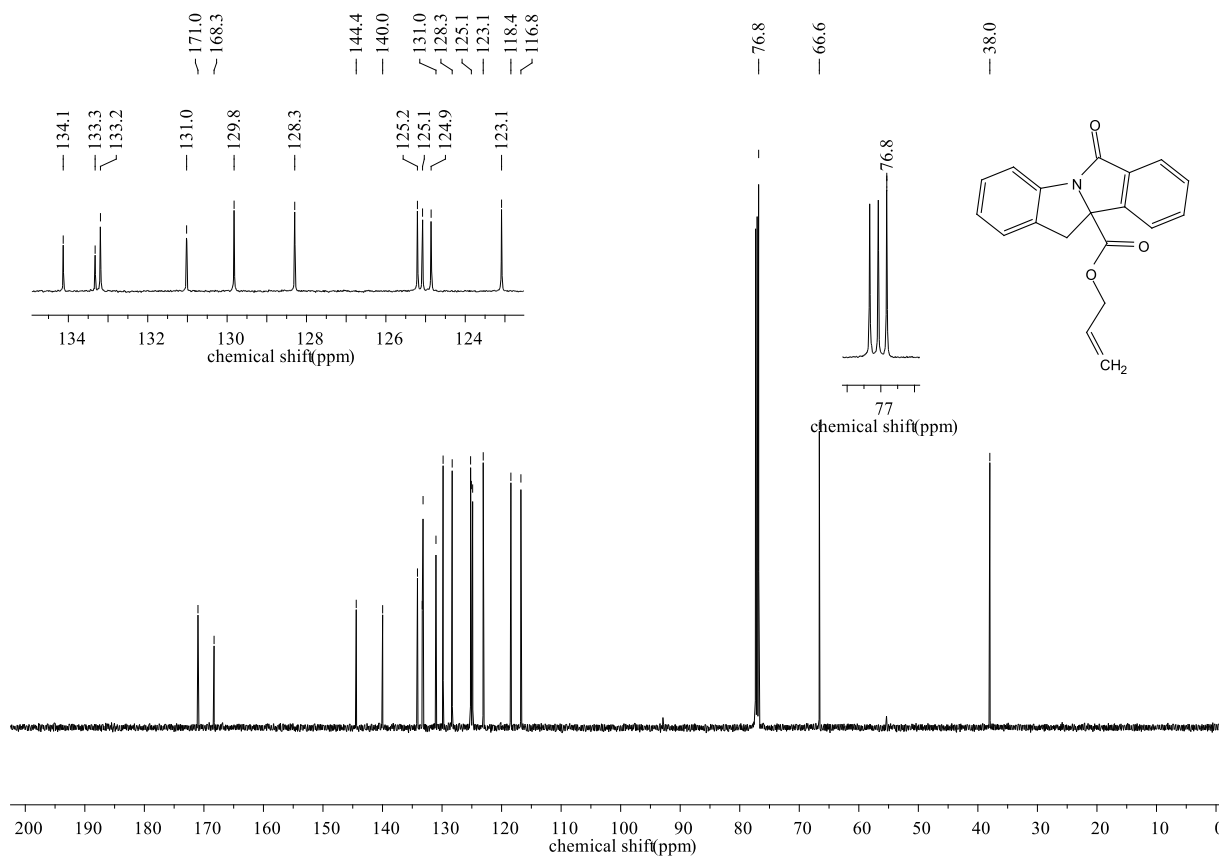

<sup>1</sup>H NMR Spectra of compound **10** (400 MHz, CDCl<sub>3</sub>)

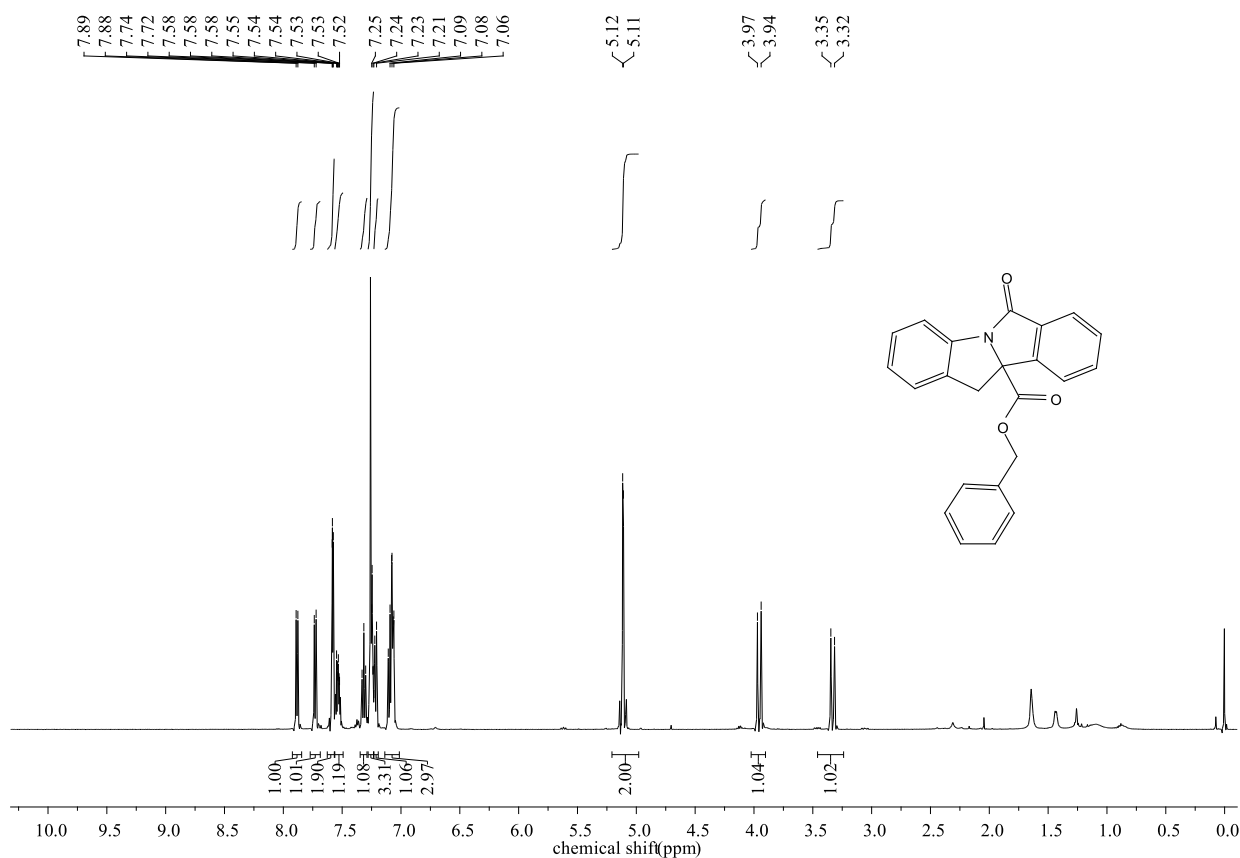

<sup>13</sup>C NMR Spectra of compound **10** (100 MHz, CDCl<sub>3</sub>)

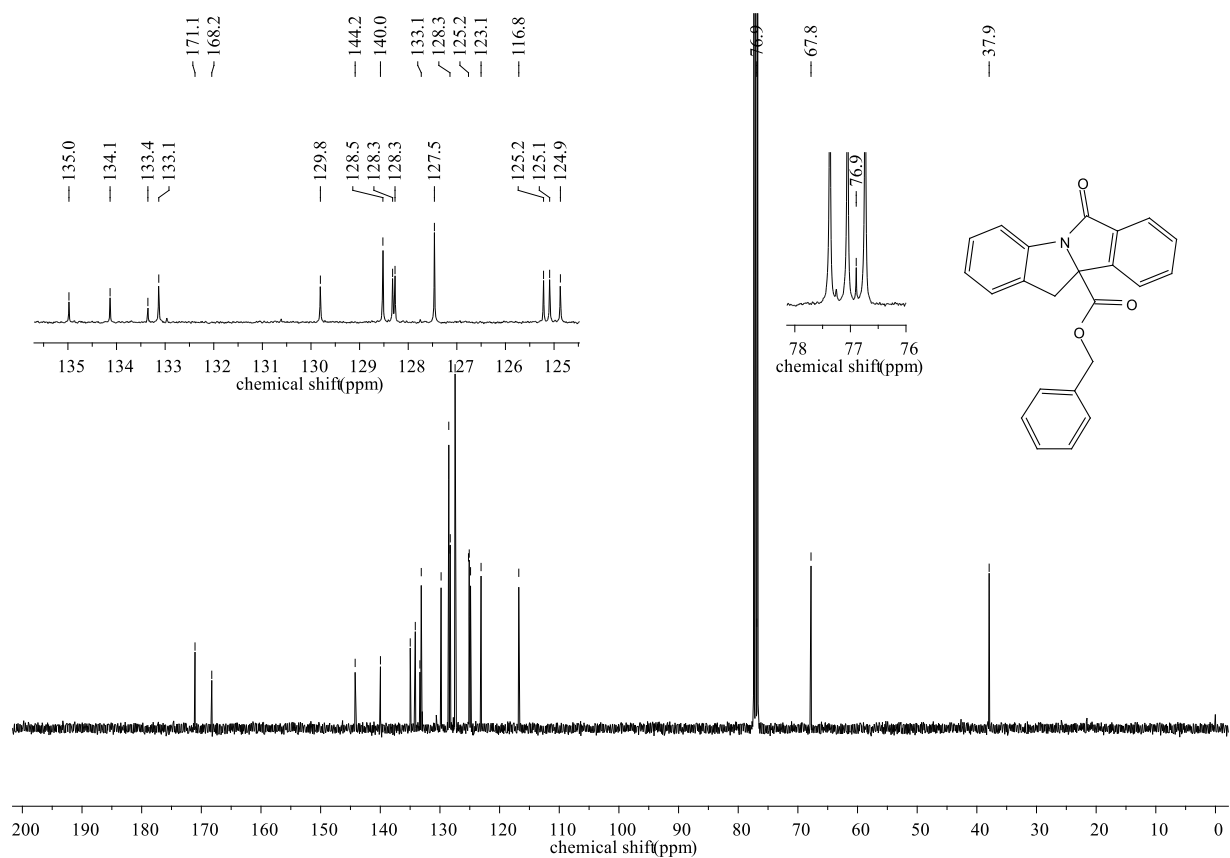

<sup>1</sup>H NMR Spectra of compound **11** (400 MHz, CDCl<sub>3</sub>)

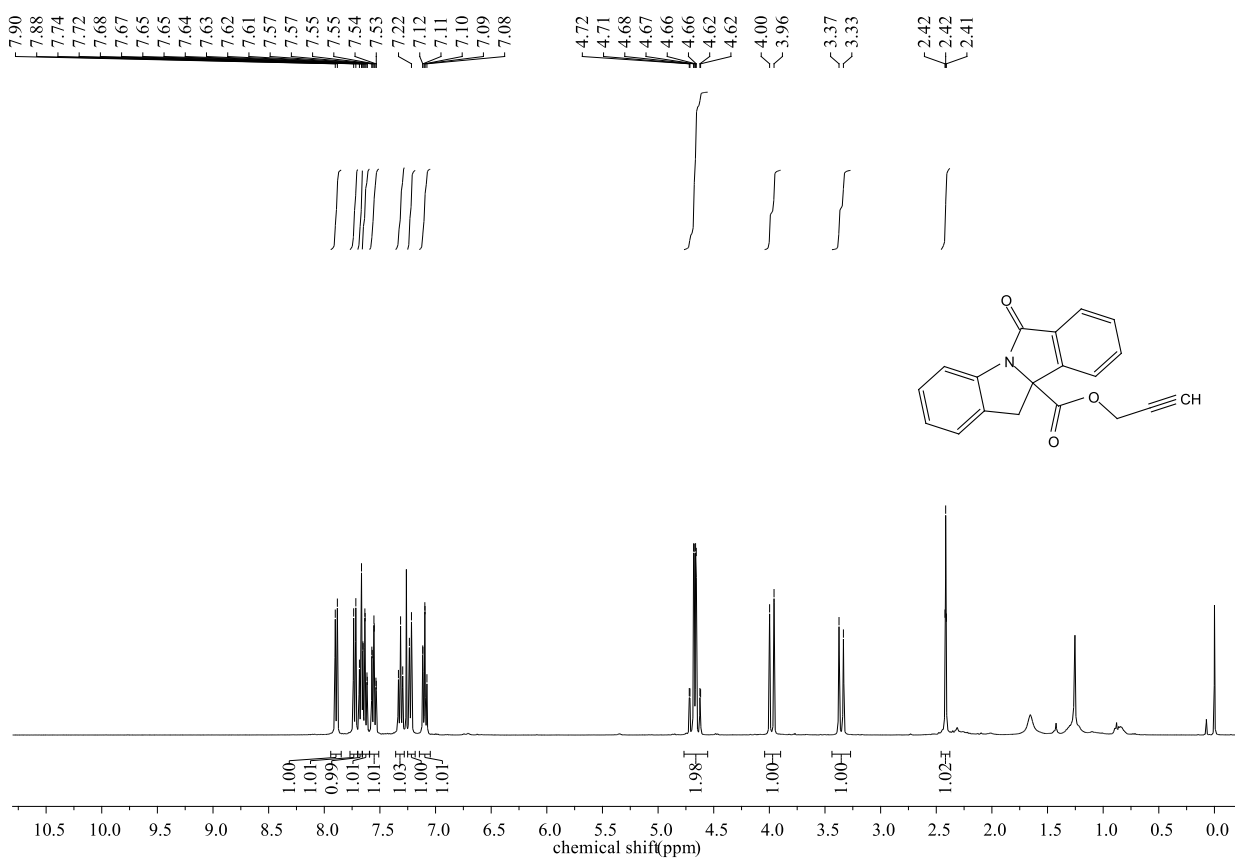

<sup>13</sup>C NMR Spectra of compound **11** (125 MHz, CDCl<sub>3</sub>)

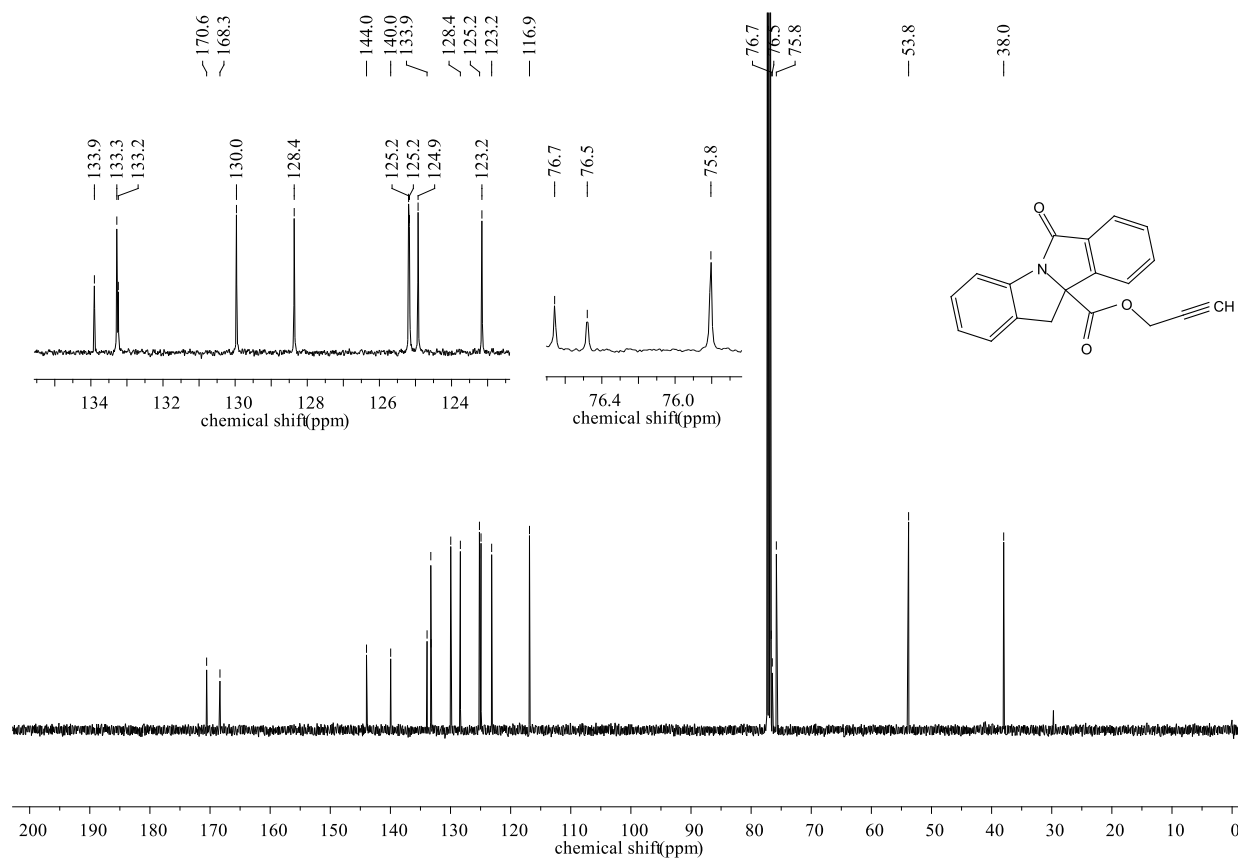

<sup>1</sup>H NMR Spectra of compound **12** (400 MHz, CDCl<sub>3</sub>)

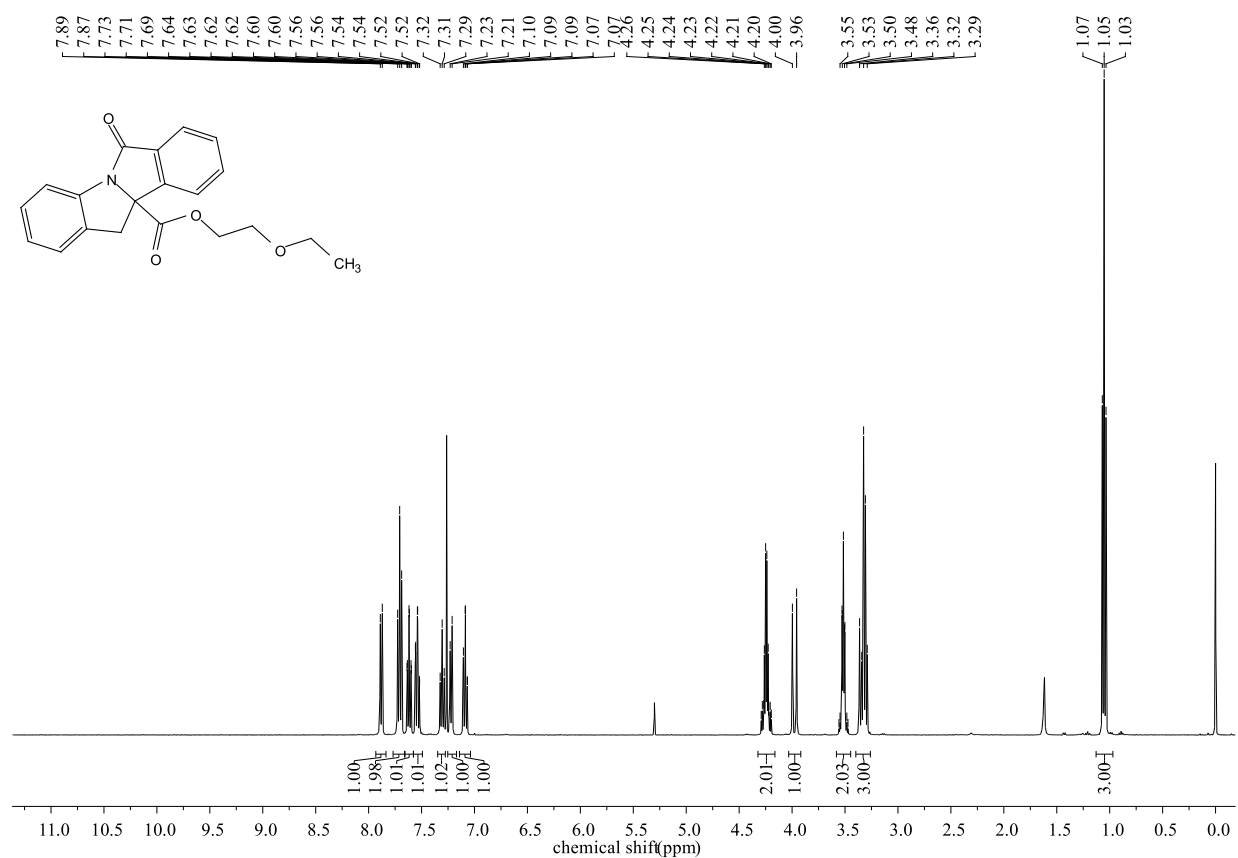

<sup>13</sup>C NMR Spectra of compound **12** (125 MHz, CDCl<sub>3</sub>)

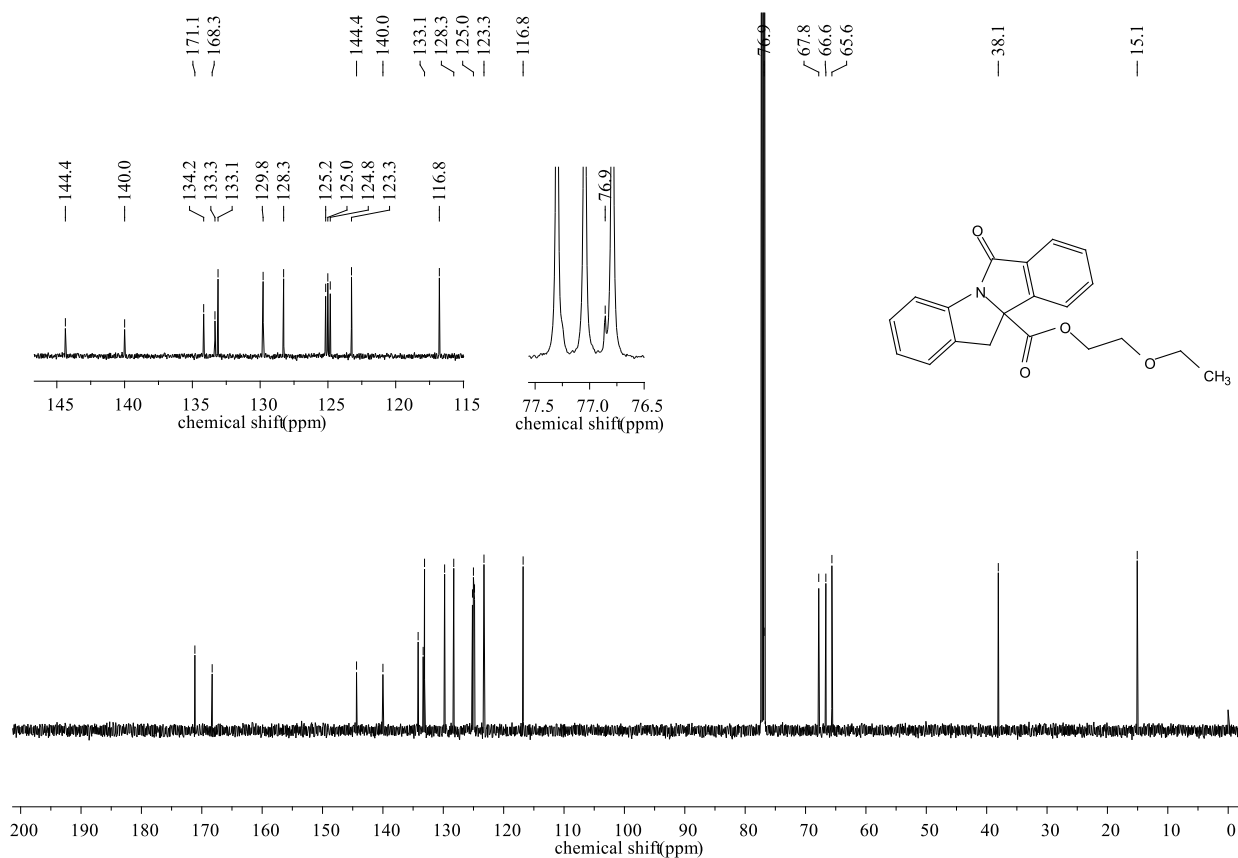

<sup>1</sup>H NMR Spectra of compound **13** (500 MHz, CDCl<sub>3</sub>)

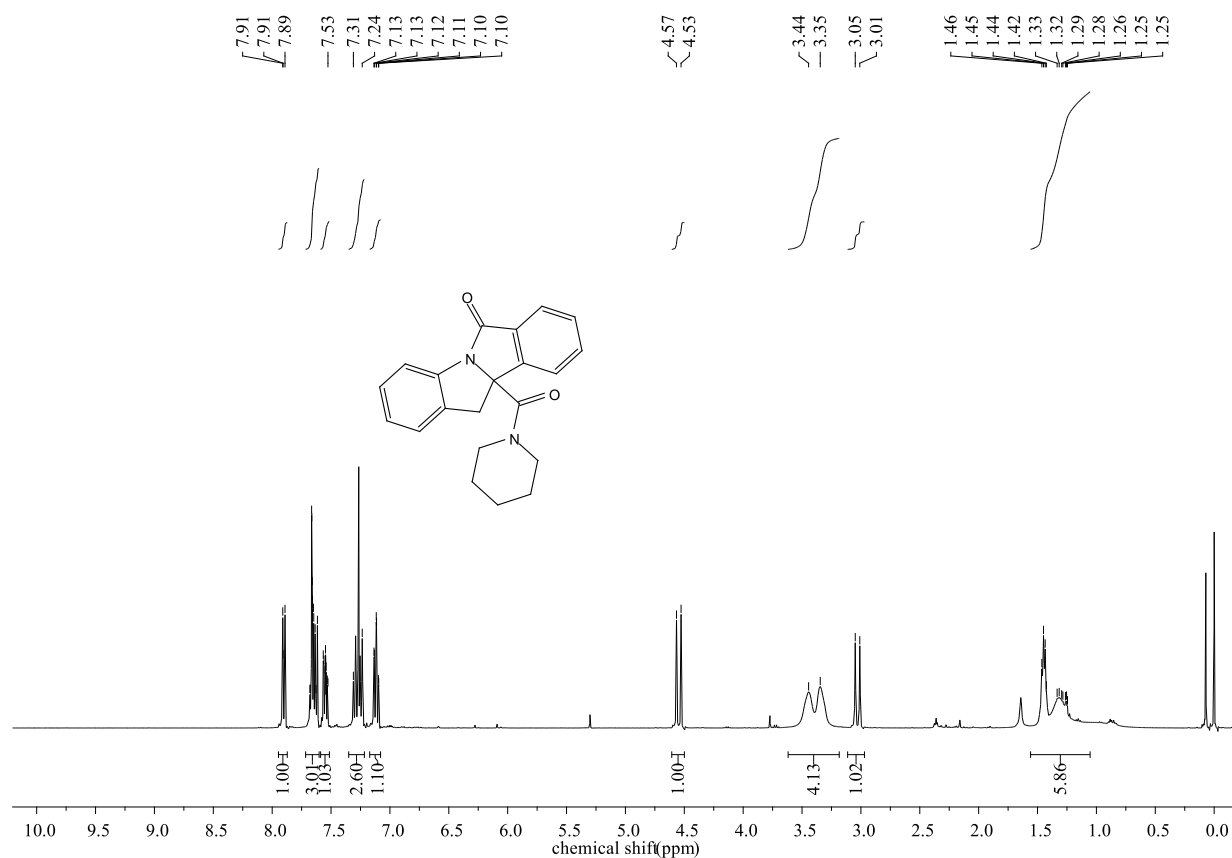

<sup>13</sup>C NMR Spectra of compound **13** (125 MHz, CDCl<sub>3</sub>)

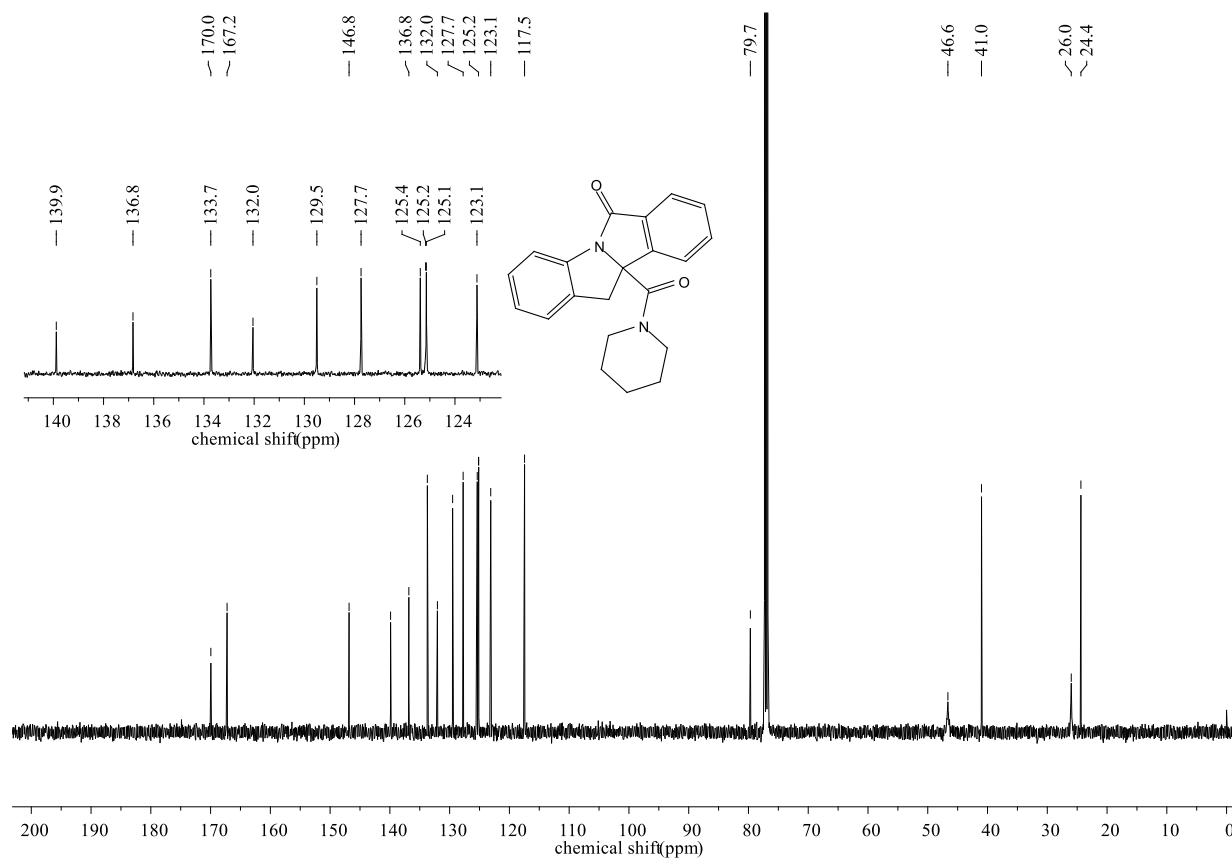

<sup>1</sup>H NMR Spectra of compound **14** (500 MHz, CDCl<sub>3</sub>)

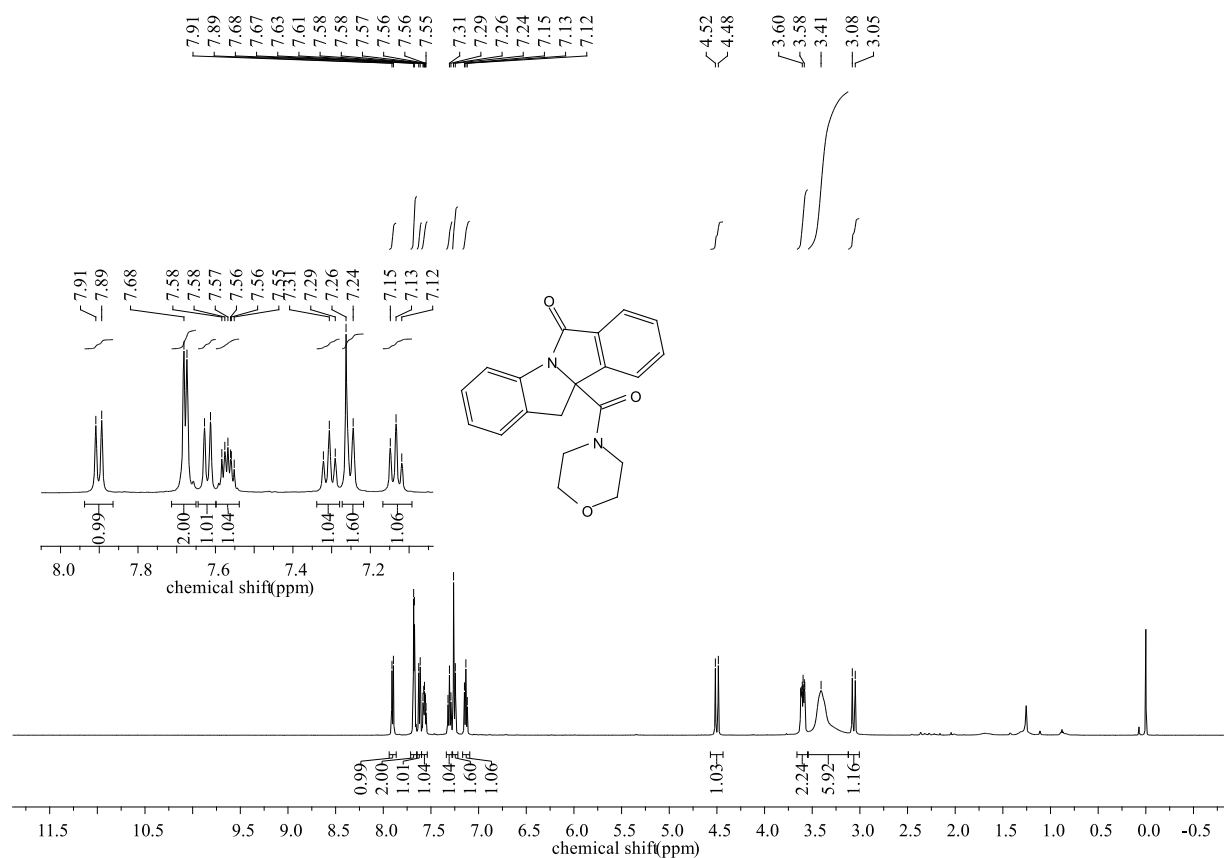

Chemical structure of compound 10: O=C1C(=O)N2C(=O)C3=CC=CC=C3N(C2Cc4ccccc4)C1OCCO2

<sup>13</sup>C NMR spectrum (CDCl<sub>3</sub>) of compound 10. The main spectrum shows peaks from 0 to 200 ppm. The inset shows the aromatic region from 124 to 140 ppm.

Chemical shift (ppm) values for the main spectrum:

- 169.9
- 168.0
- 146.4
- 136.6
- 131.8
- 127.9
- 125.3
- 123.2
- 117.5
- 79.5
- 66.7
- 45.9
- 41.0

Chemical shift (ppm) values for the inset:

- 139.7
- 136.6
- 134.0
- 131.8
- 129.8
- 127.9
- 125.6
- 125.3
- 125.2

<sup>1</sup>H NMR spectrum (CDCl<sub>3</sub>) of compound 10. The spectrum shows peaks from 0.44 to 7.89 ppm. The chemical structure of compound 10 is shown above the spectrum.

<sup>13</sup>C NMR Spectra of compound **15** (100 MHz, CDCl<sub>3</sub>)

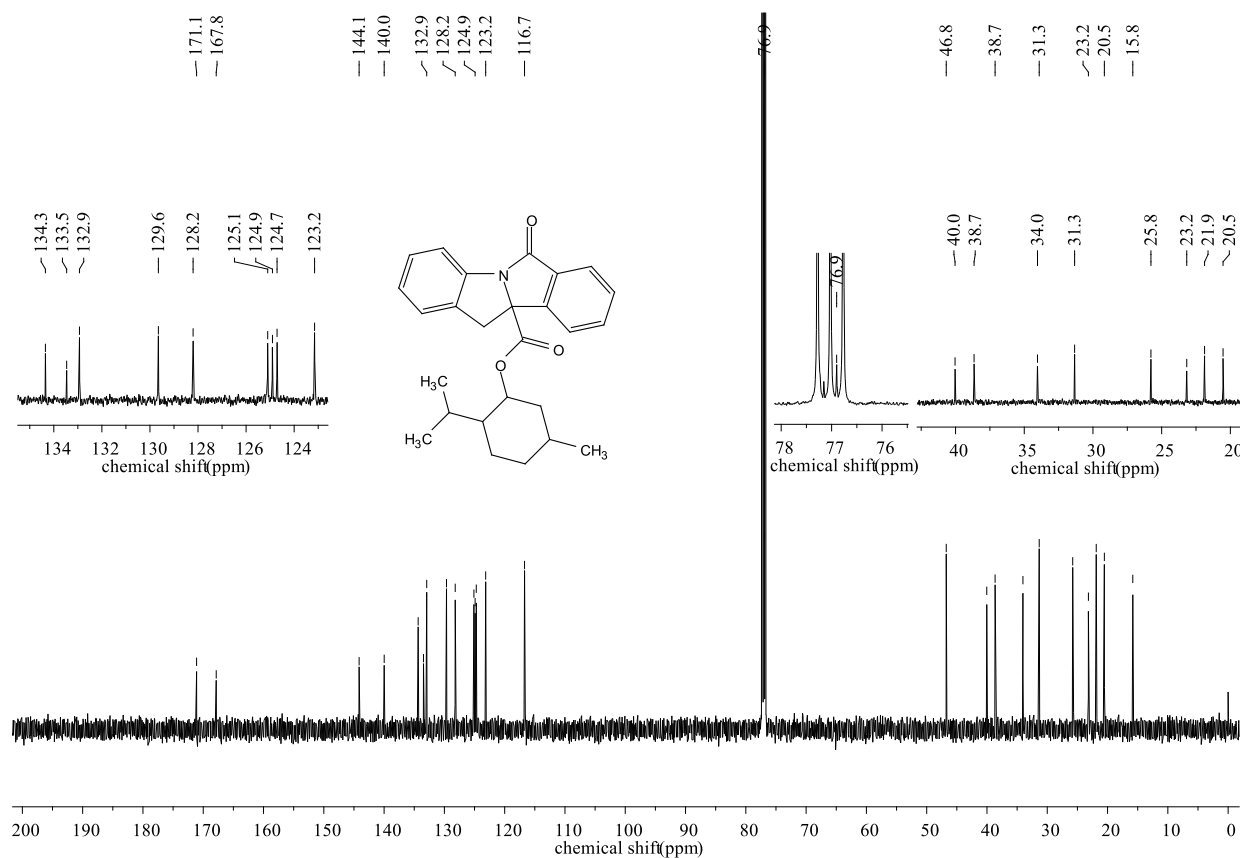

<sup>1</sup>H NMR Spectra of compound **16** (500 MHz, CDCl<sub>3</sub>)

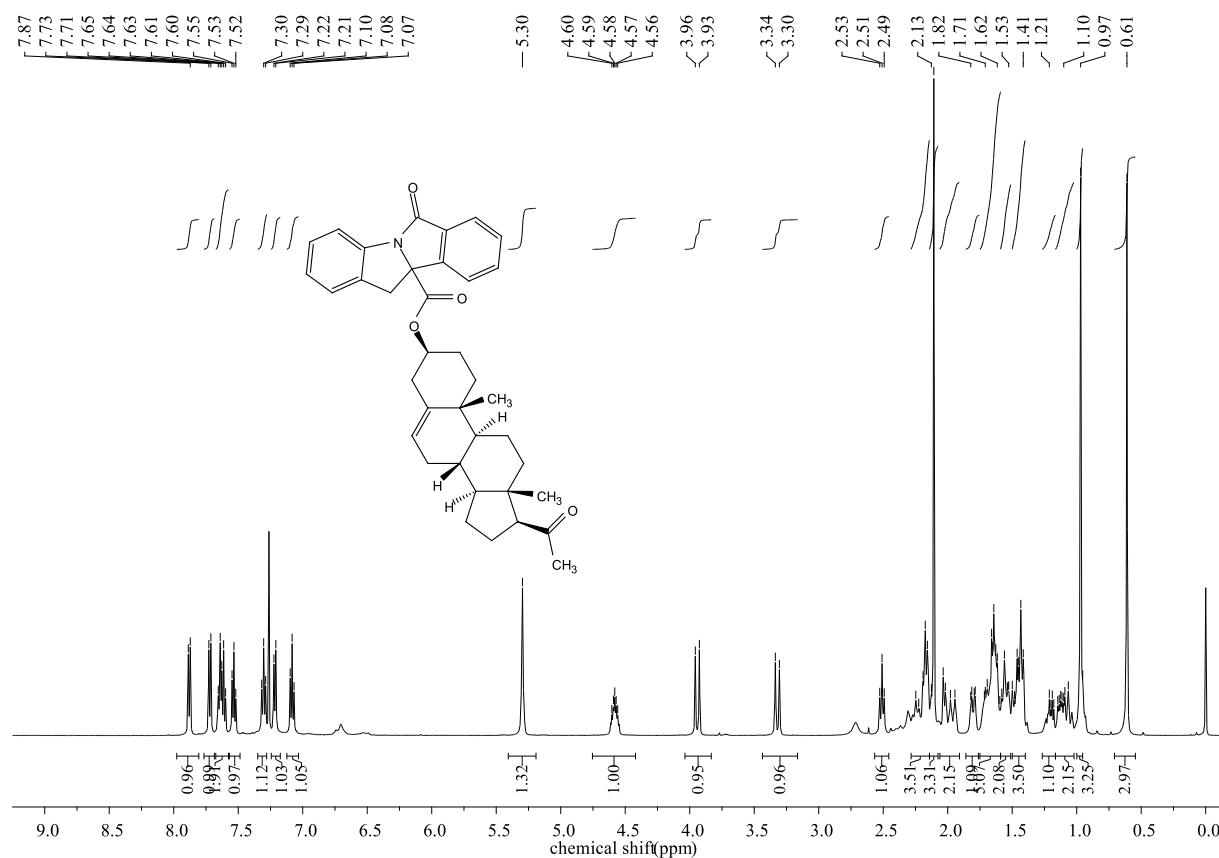

<sup>13</sup>C NMR Spectra of compound **16** (125 MHz, CDCl<sub>3</sub>)

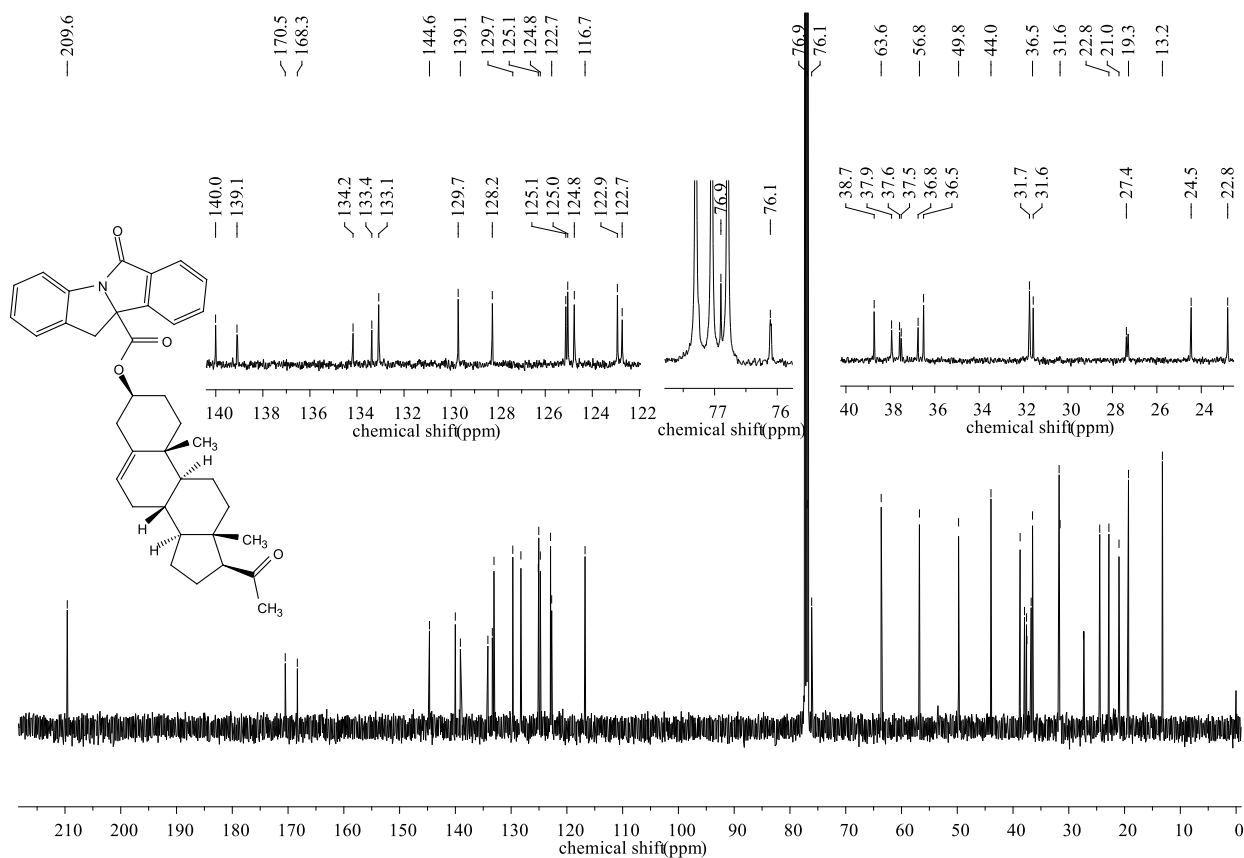

<sup>1</sup>H NMR Spectra of compound **17** (500 MHz, CDCl<sub>3</sub>)

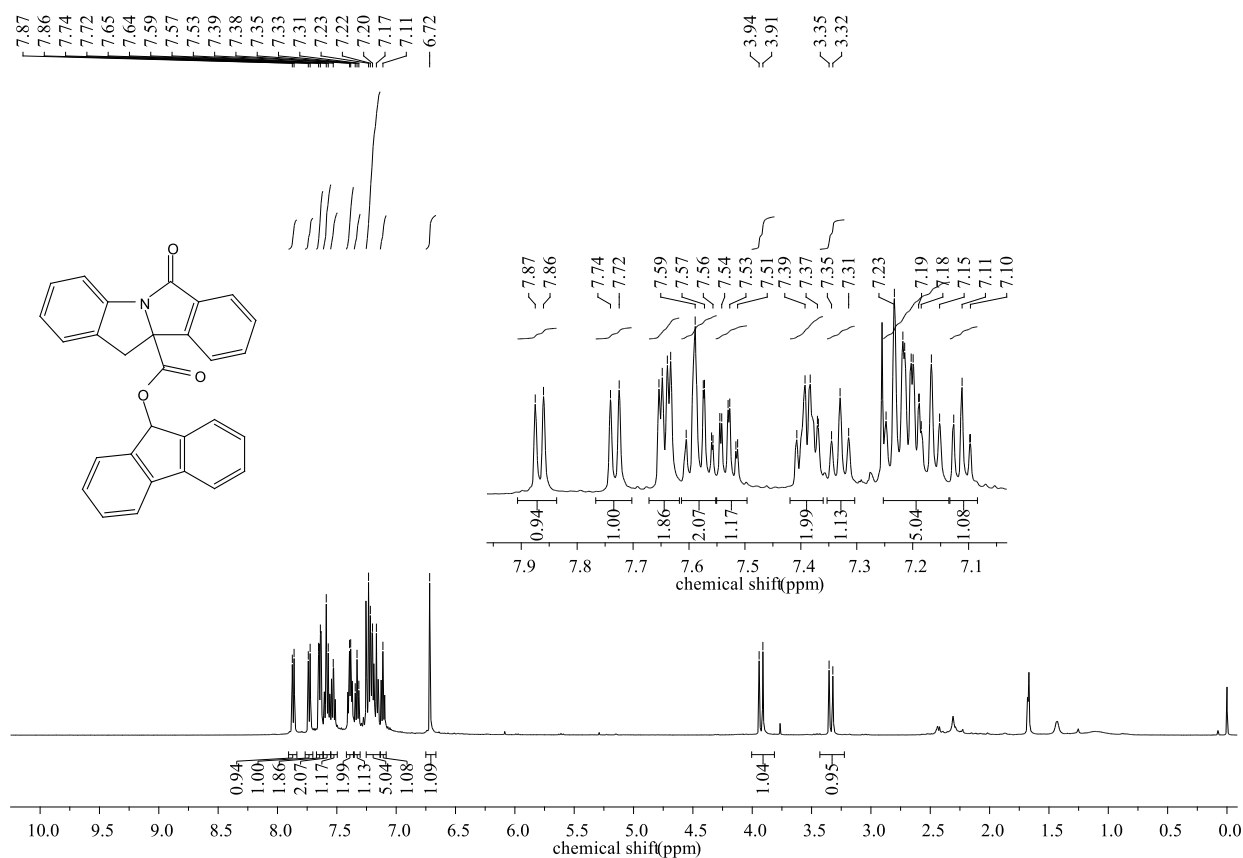

<sup>13</sup>C NMR Spectra of compound **17** (125 MHz, CDCl<sub>3</sub>)

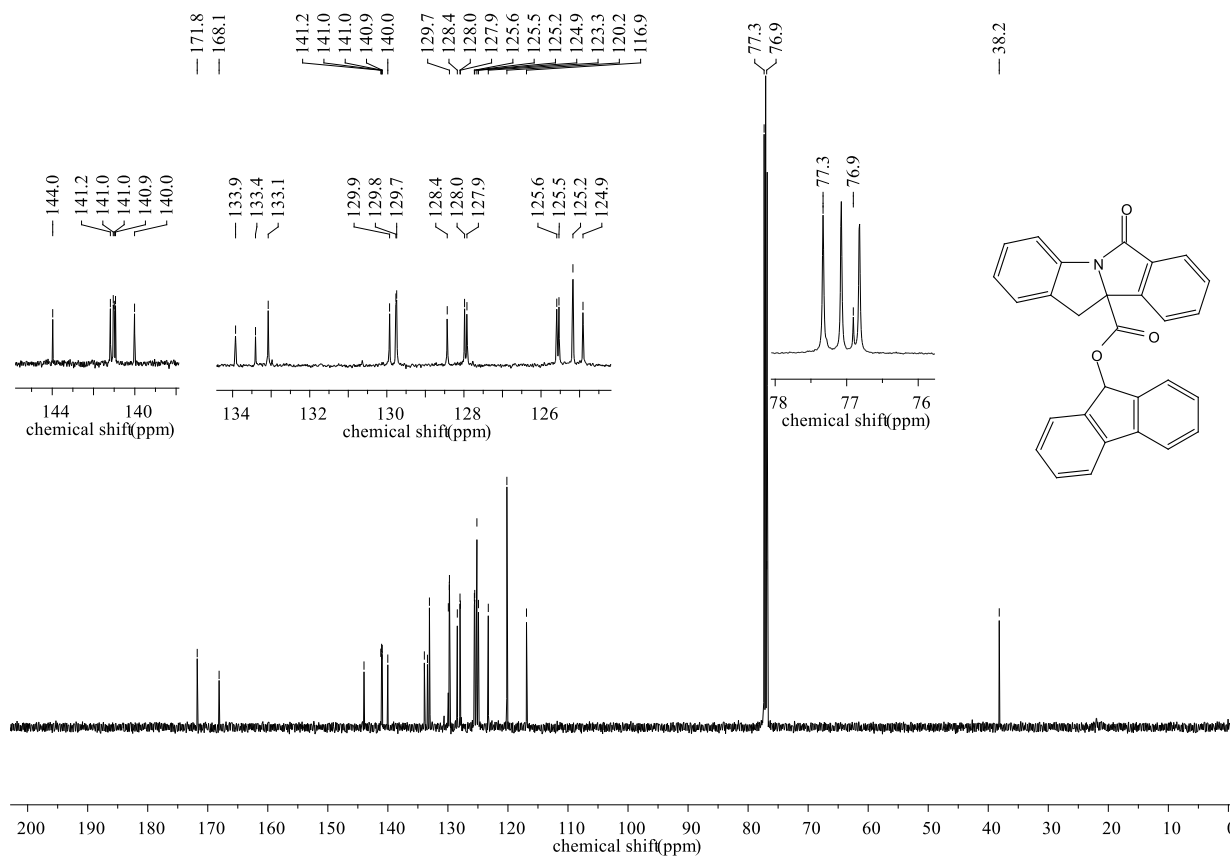

<sup>1</sup>H NMR Spectra of compound **18** (500 MHz, CDCl<sub>3</sub>)

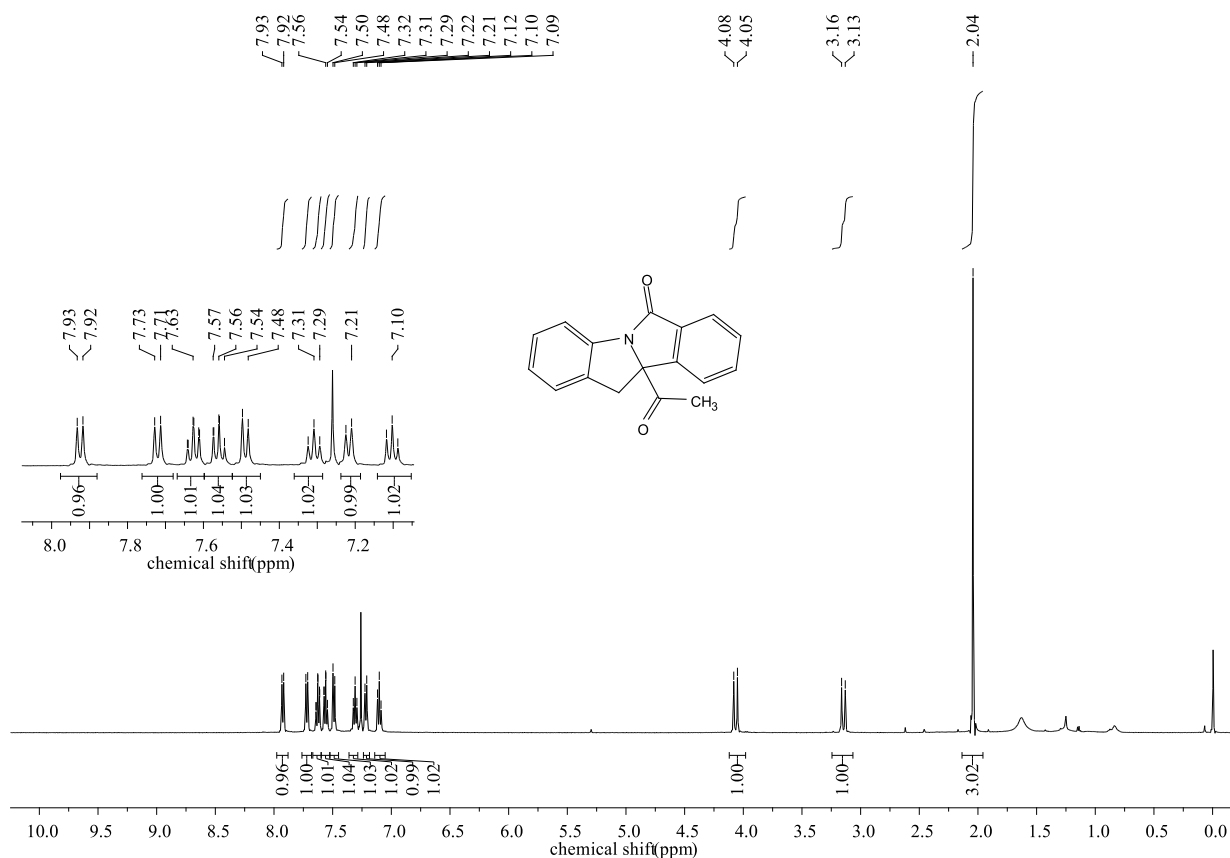

<sup>13</sup>C NMR Spectra of compound **18** (125 MHz, CDCl<sub>3</sub>)

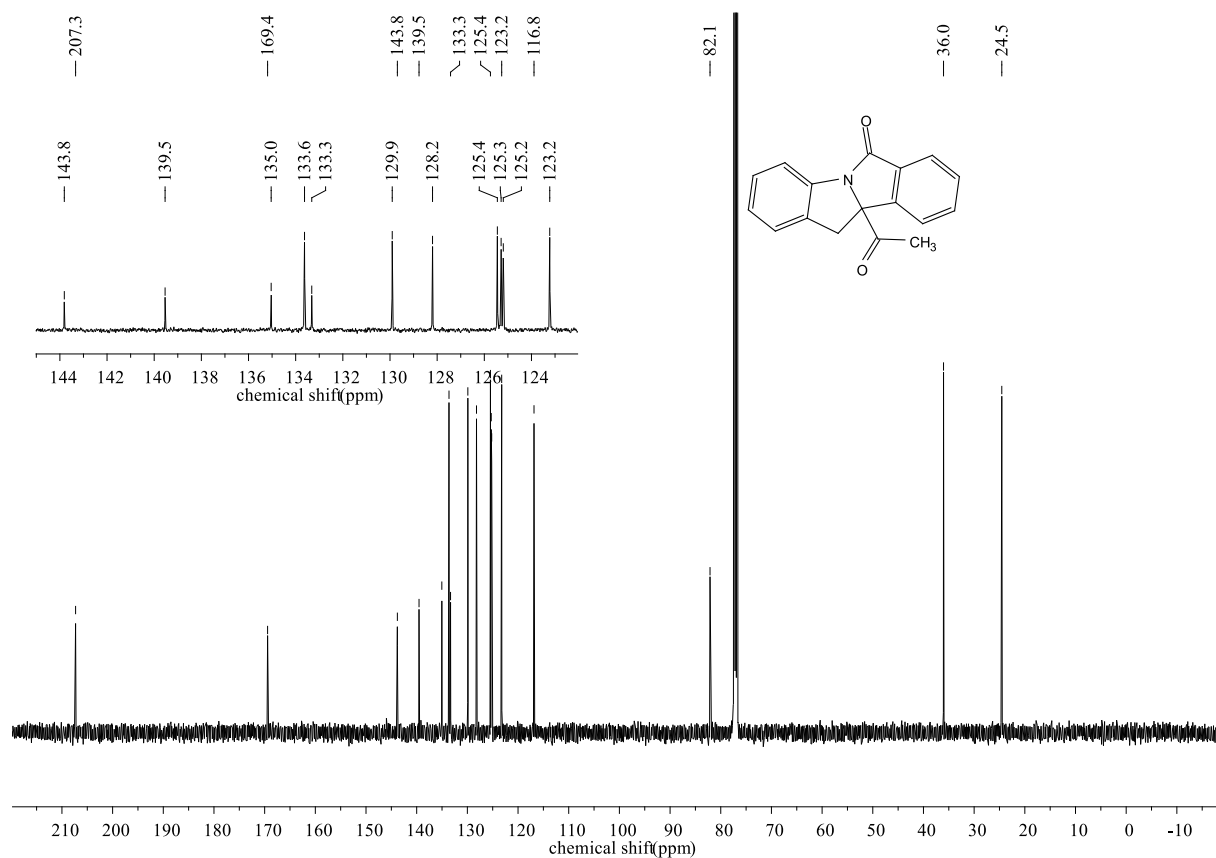

<sup>1</sup>H NMR Spectra of compound **20** (400 MHz, CDCl<sub>3</sub>)

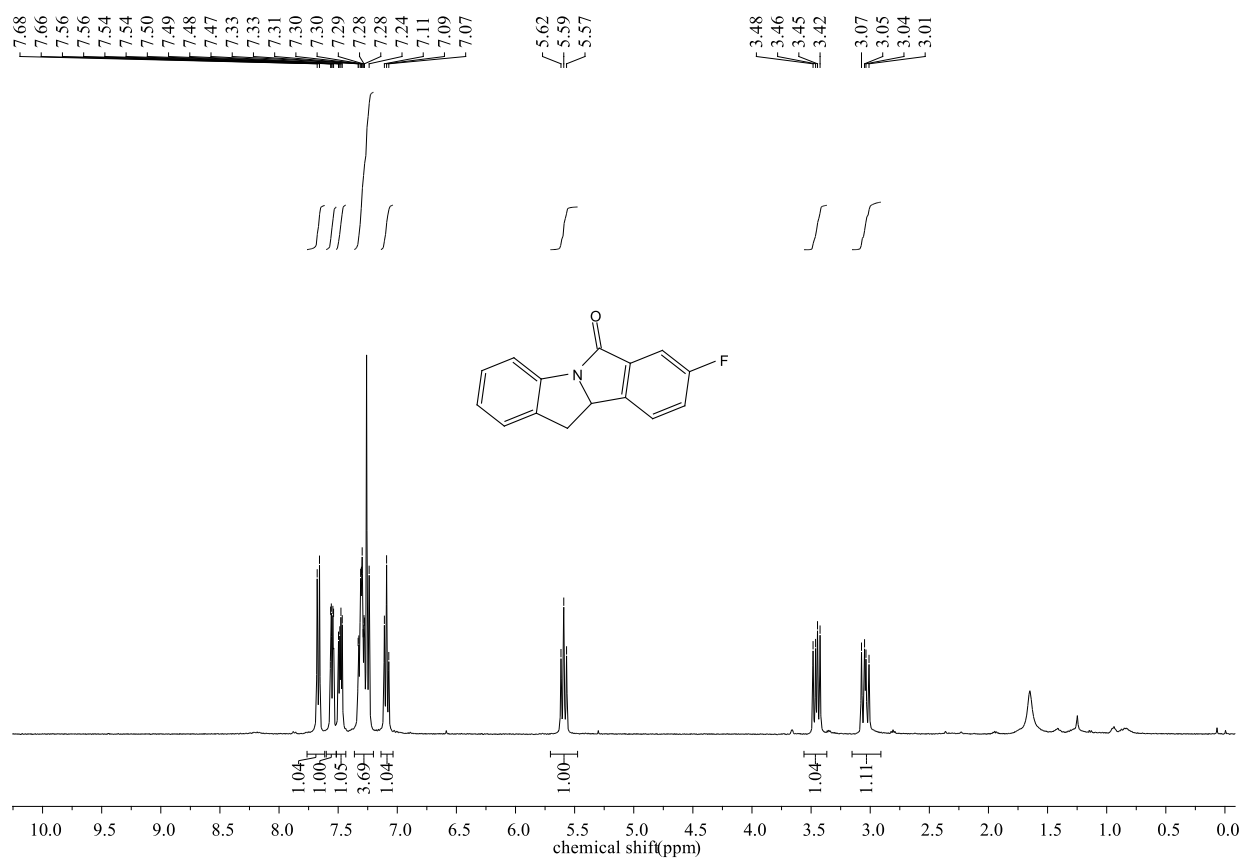

<sup>13</sup>C NMR Spectra of compound **20** (100 MHz, CDCl<sub>3</sub>)

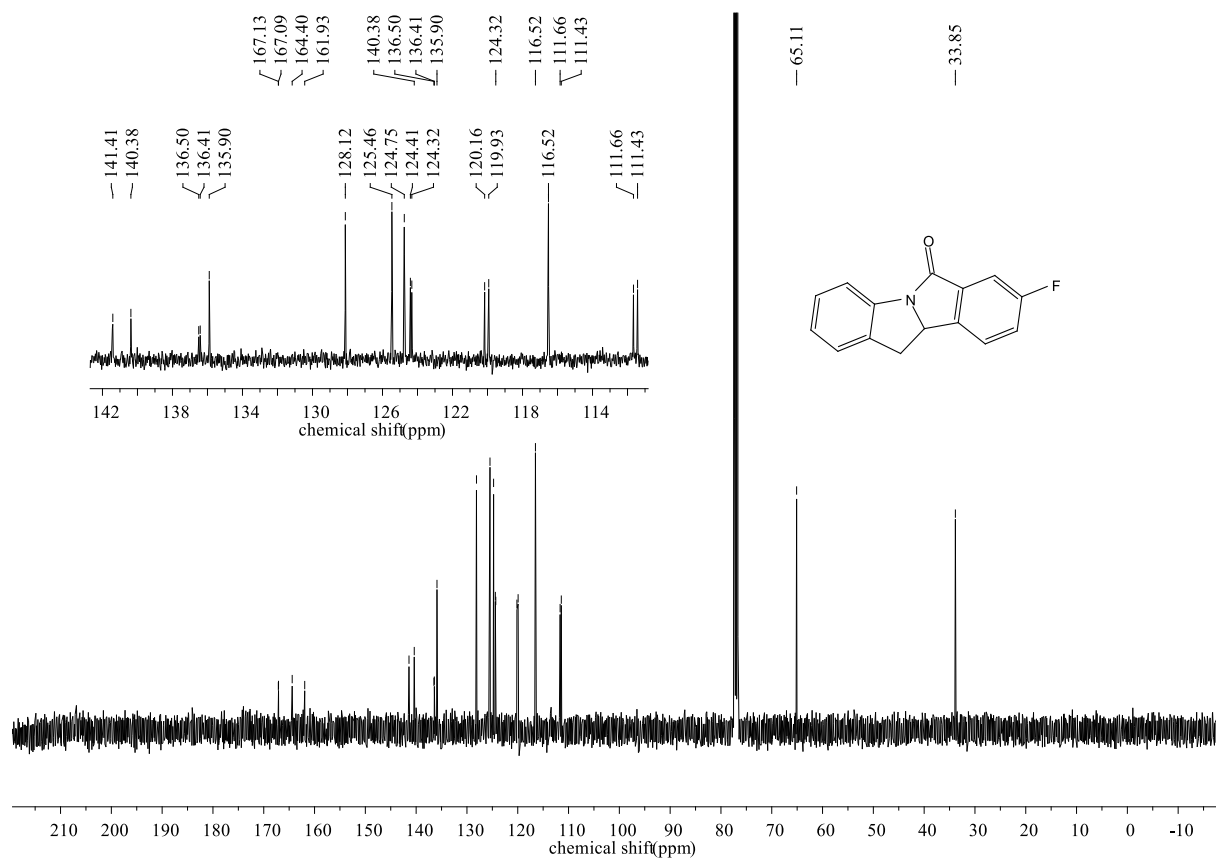

<sup>19</sup>F NMR Spectra of compound **20** (300 MHz, CDCl<sub>3</sub>)

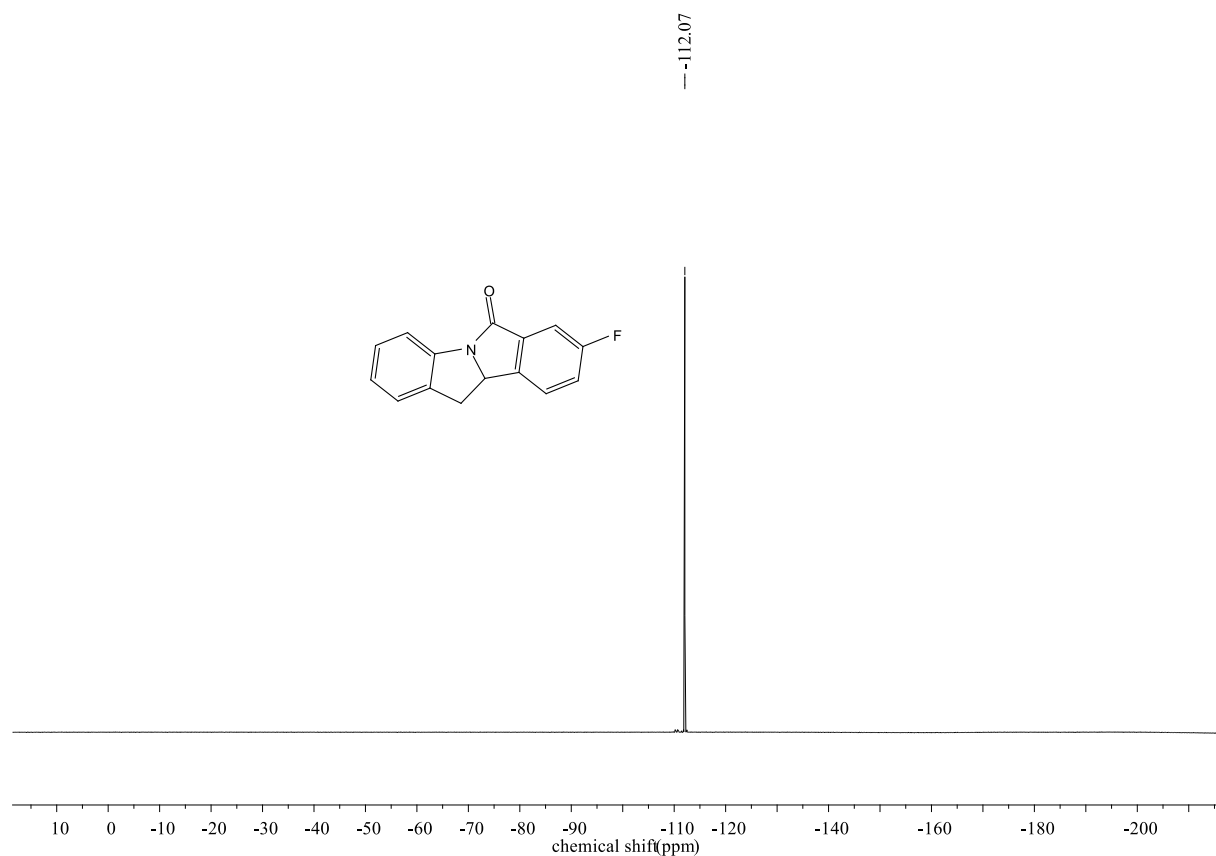

<sup>1</sup>H NMR Spectra of compound **21** (400 MHz, CDCl<sub>3</sub>)

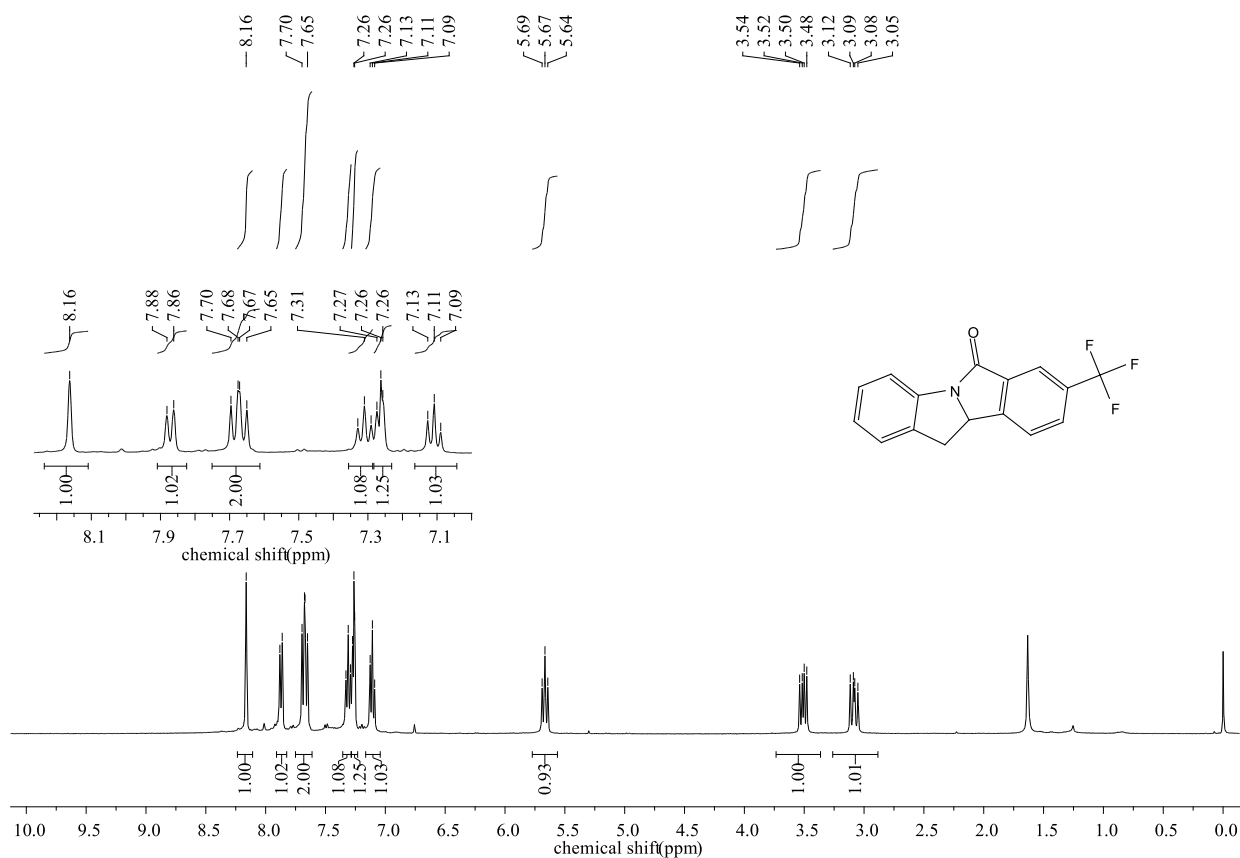

<sup>19</sup>F NMR Spectra of compound **21** (300 MHz, CDCl<sub>3</sub>)

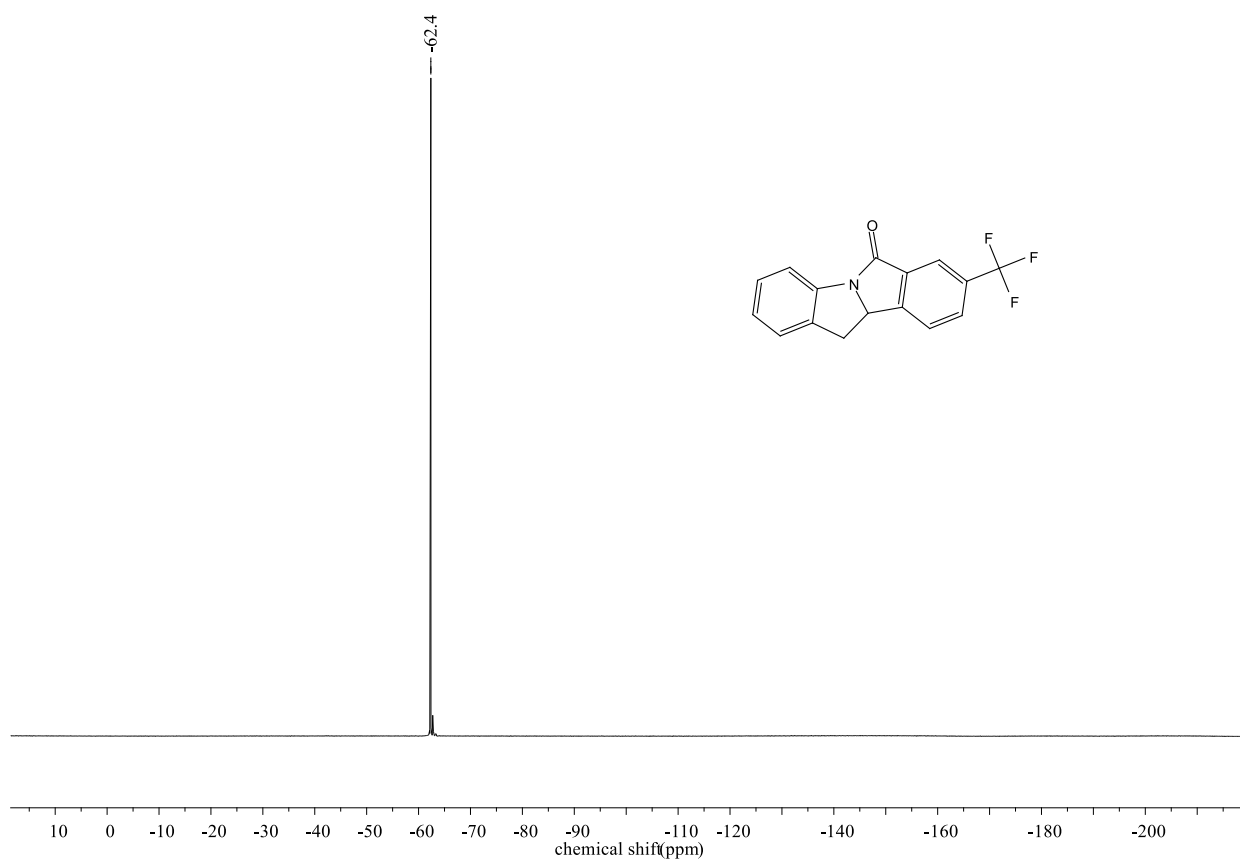

<sup>1</sup>H NMR Spectra of compound **21A** (400 MHz, CDCl<sub>3</sub>)

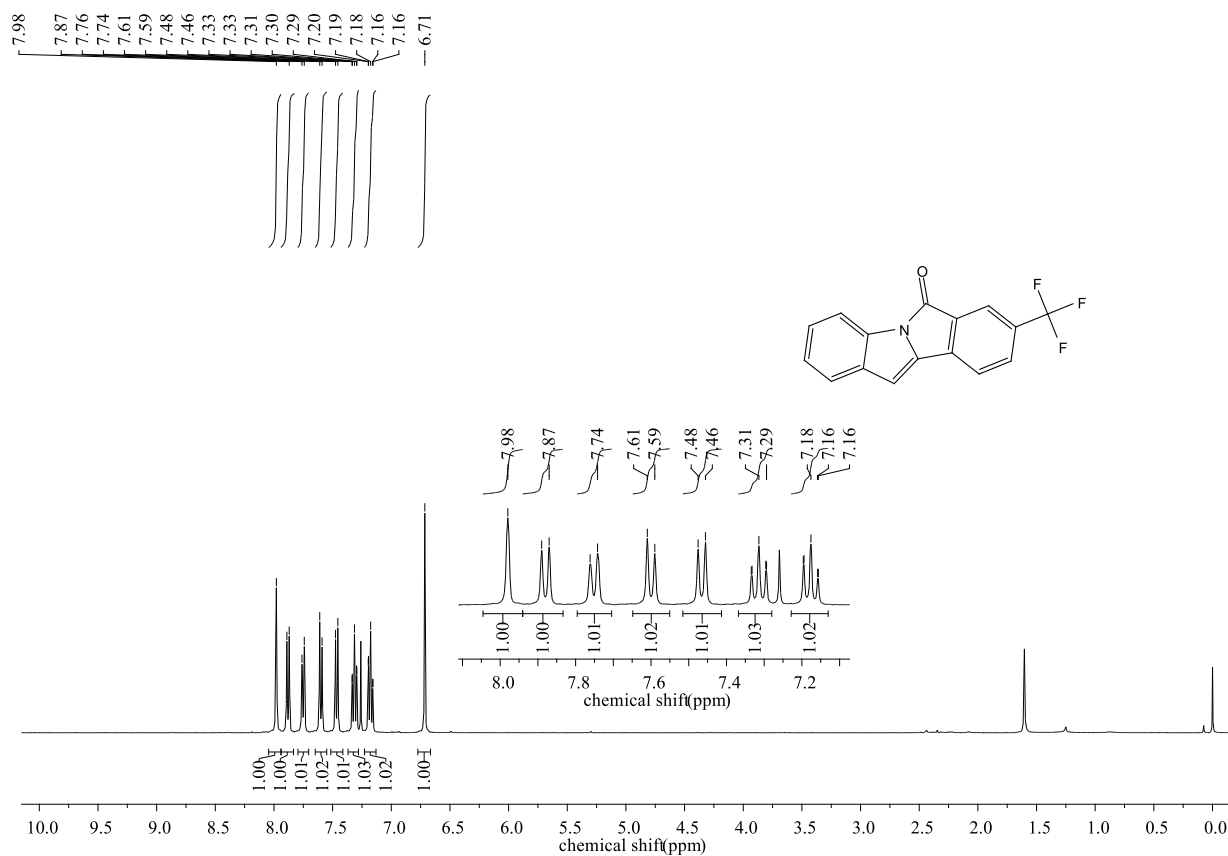

<sup>13</sup>C NMR Spectra of compound **21A** (125 MHz, CDCl<sub>3</sub>)

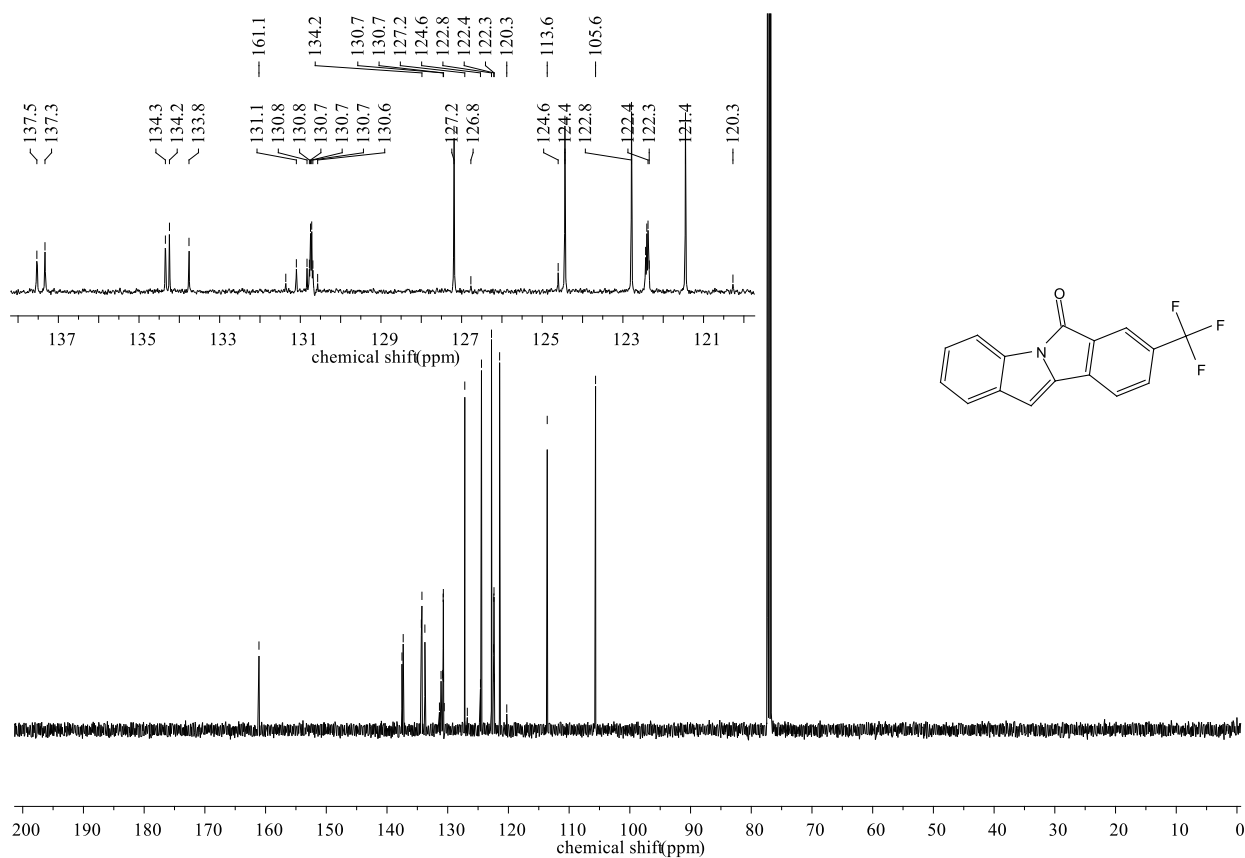

<sup>19</sup>F NMR Spectra of compound **21A** (300 MHz, CDCl<sub>3</sub>)

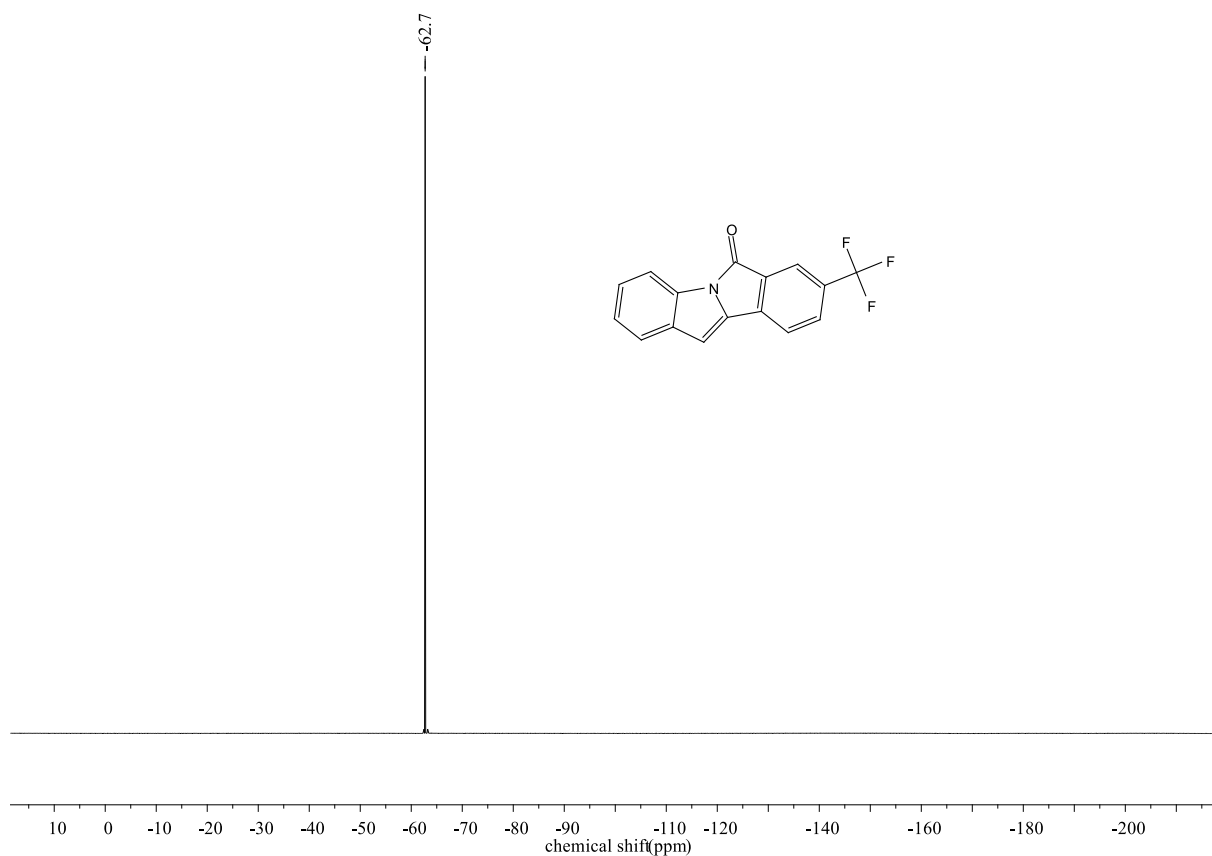

<sup>1</sup>H NMR Spectra of compound **22** (500 MHz, CDCl<sub>3</sub>)

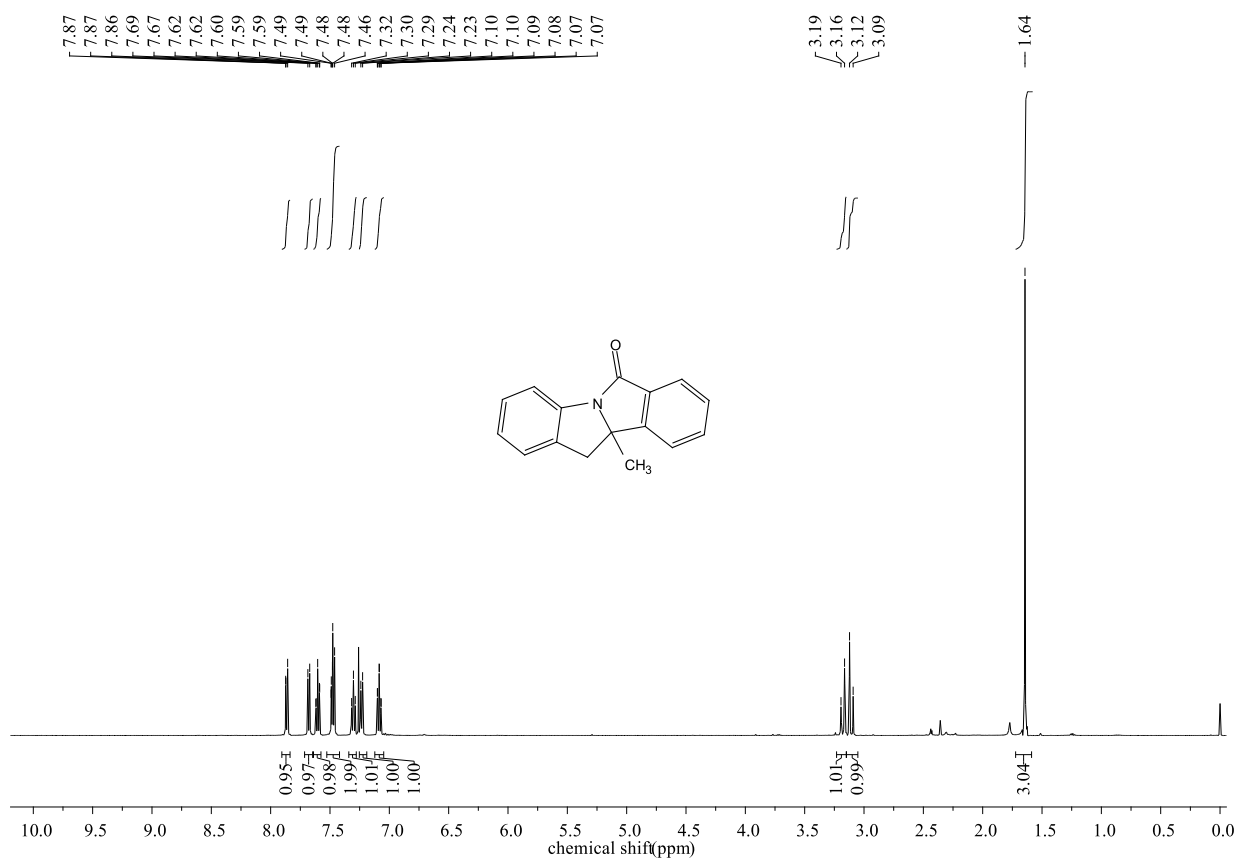

<sup>13</sup>C NMR Spectra of compound **22** (125 MHz, CDCl<sub>3</sub>)

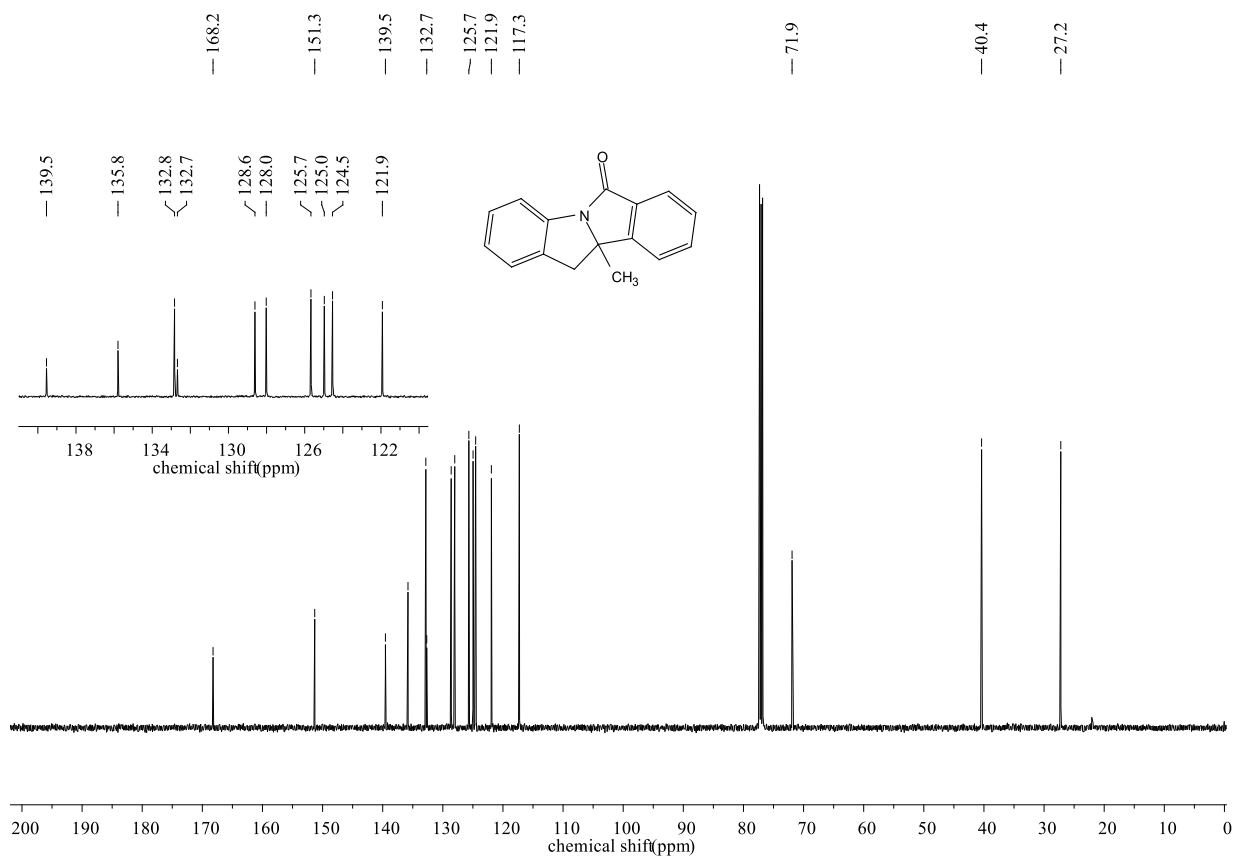

<sup>1</sup>H NMR Spectra of compound **22A** (400 MHz, CDCl<sub>3</sub>)

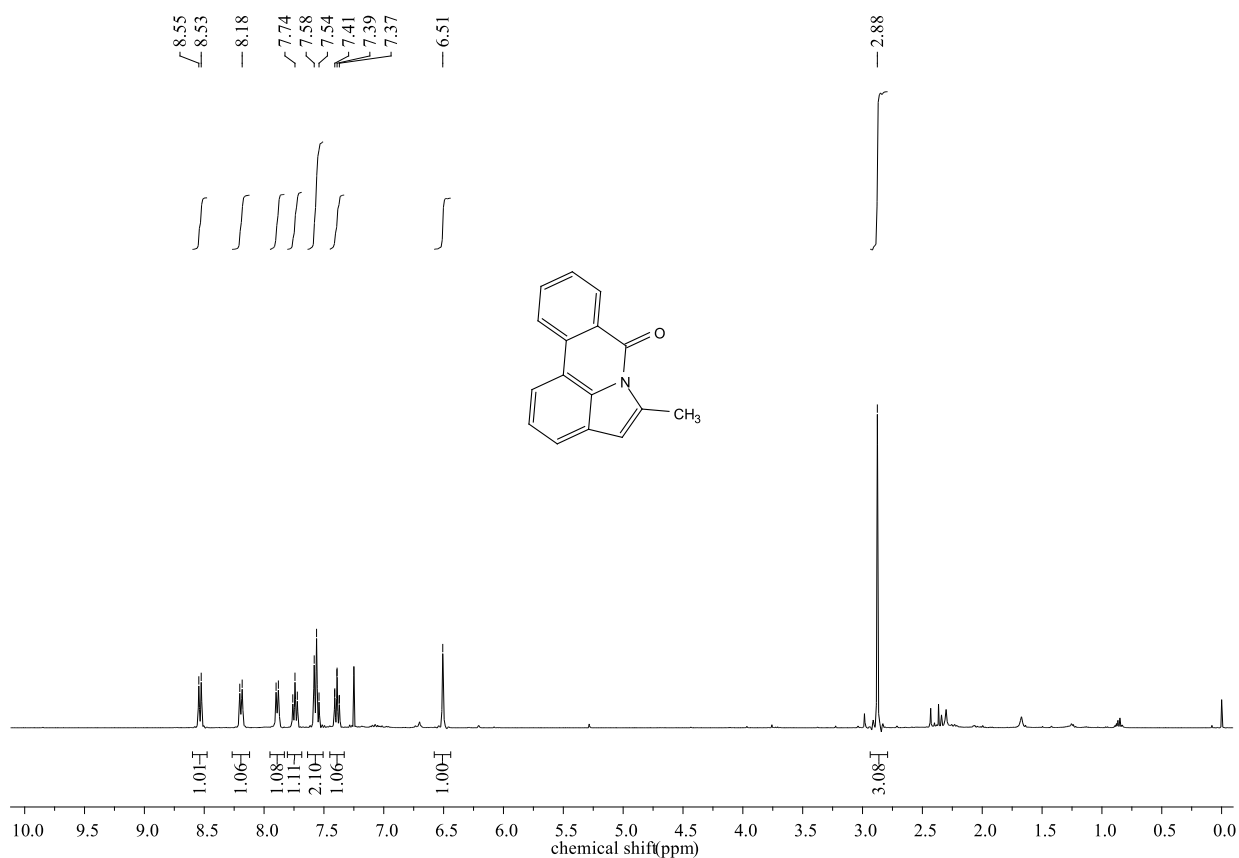

<sup>13</sup>C NMR Spectra of compound **22A** (100 MHz, CDCl<sub>3</sub>)

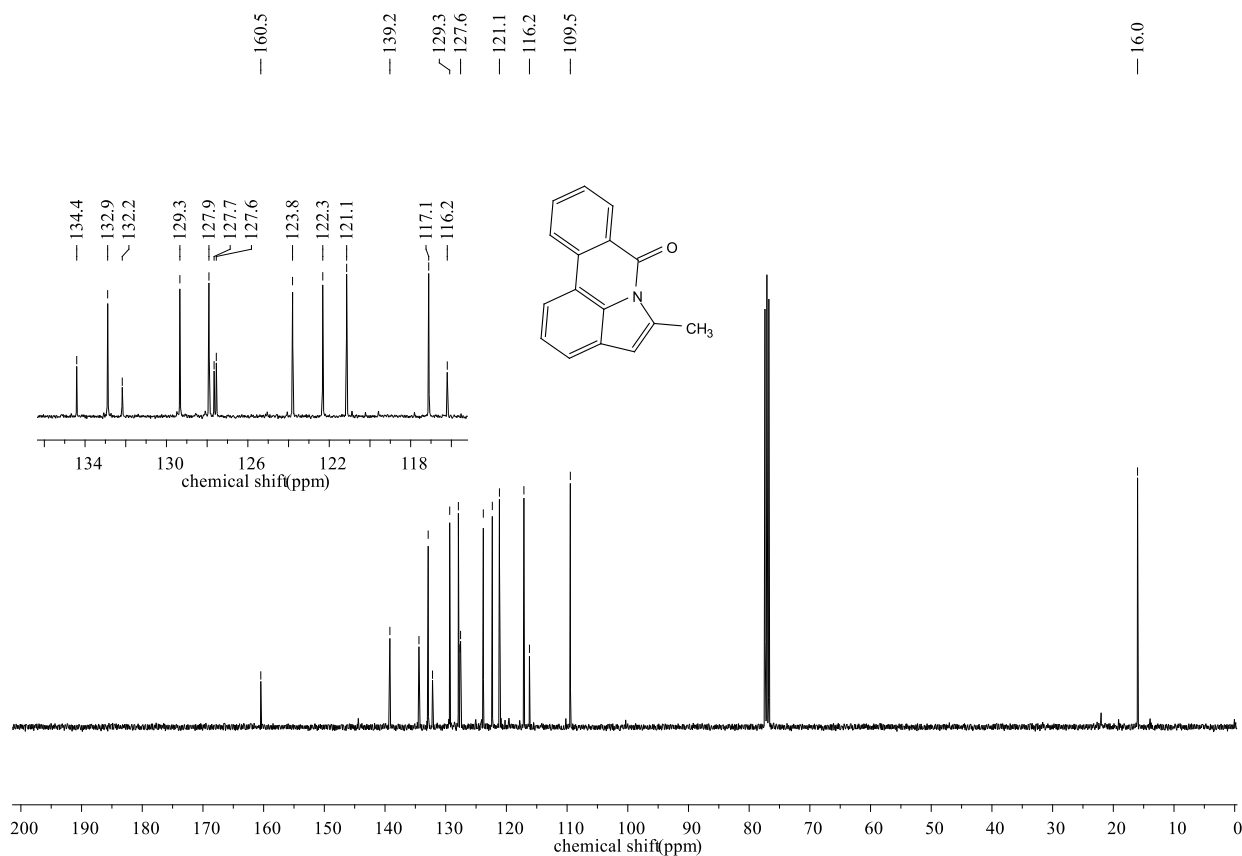

<sup>1</sup>H NMR Spectra of compound **23** (500 MHz, CDCl<sub>3</sub>)

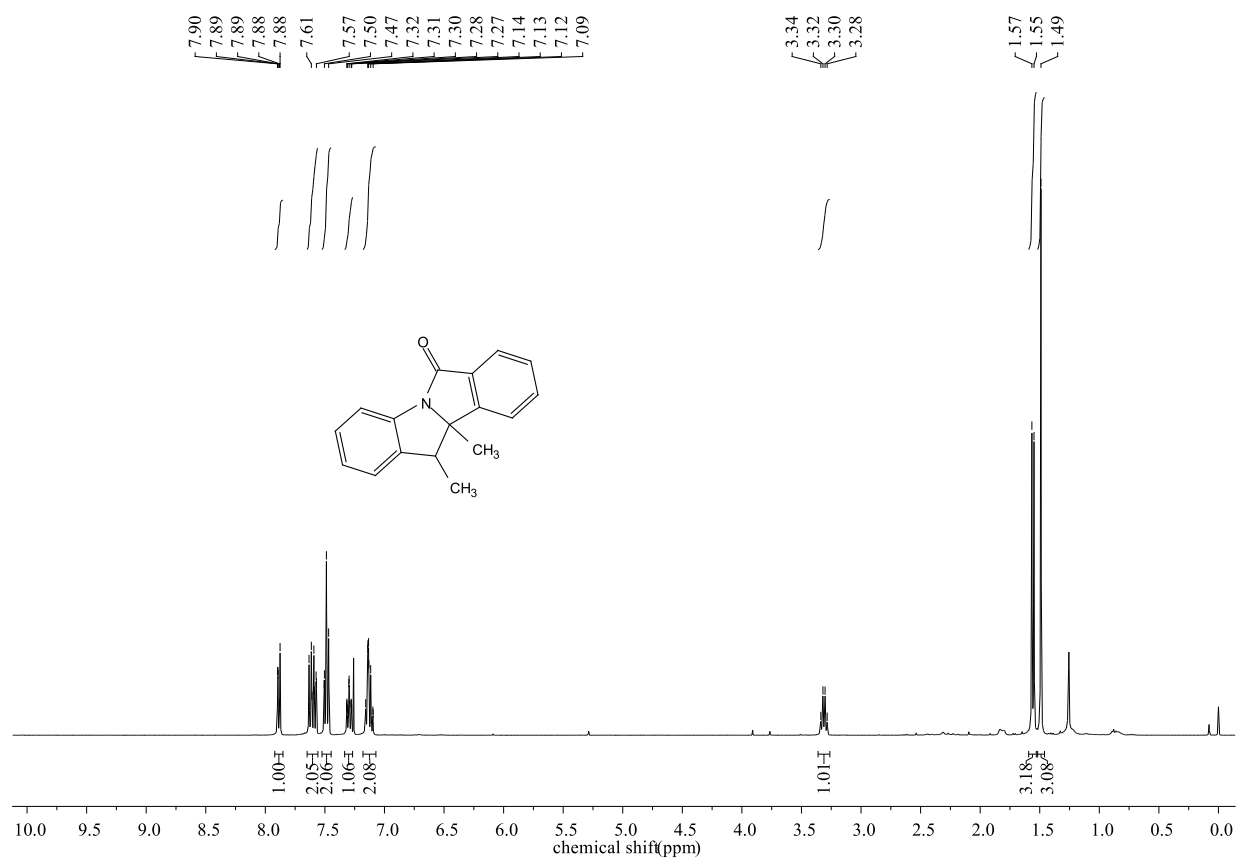

<sup>13</sup>C NMR Spectra of compound **23** (125 MHz, CDCl<sub>3</sub>)

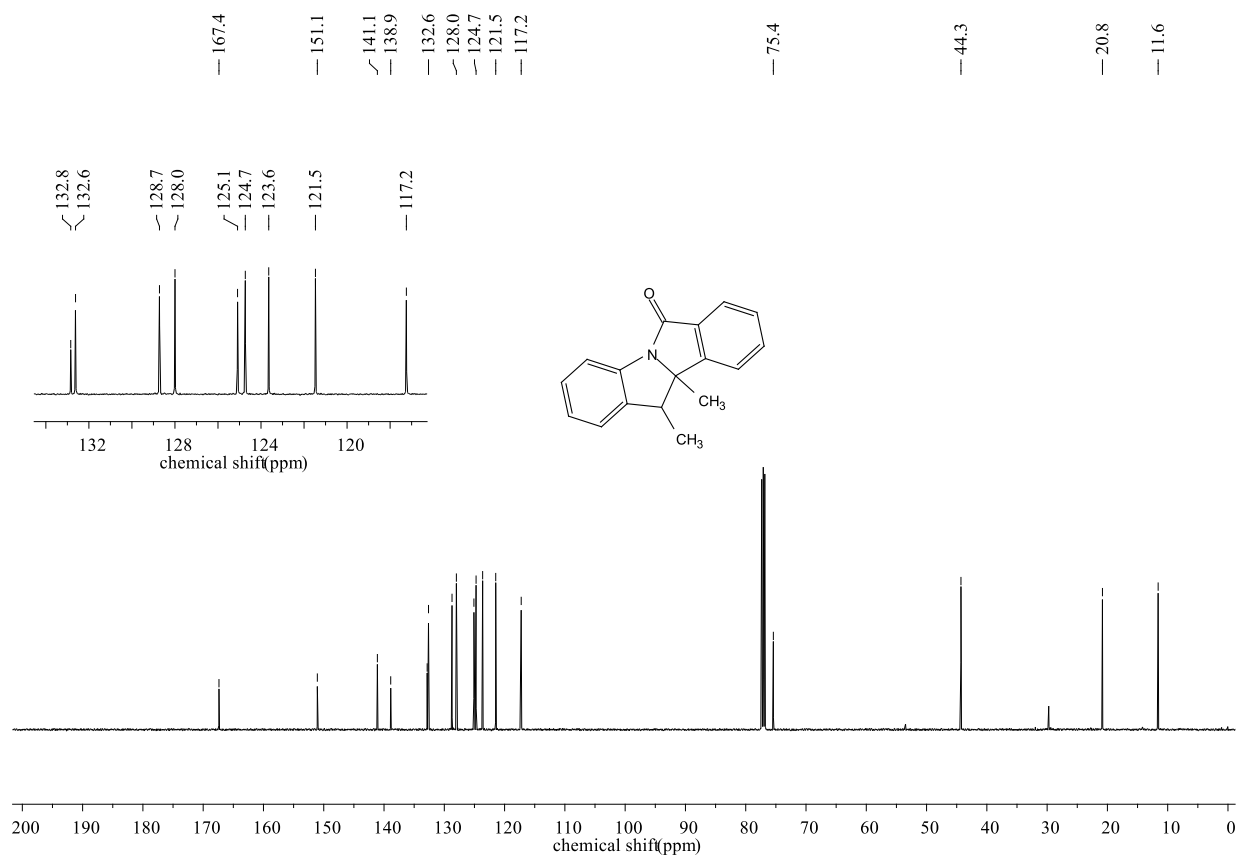

<sup>1</sup>H NMR Spectra of compound **24** (400 MHz, CDCl<sub>3</sub>)

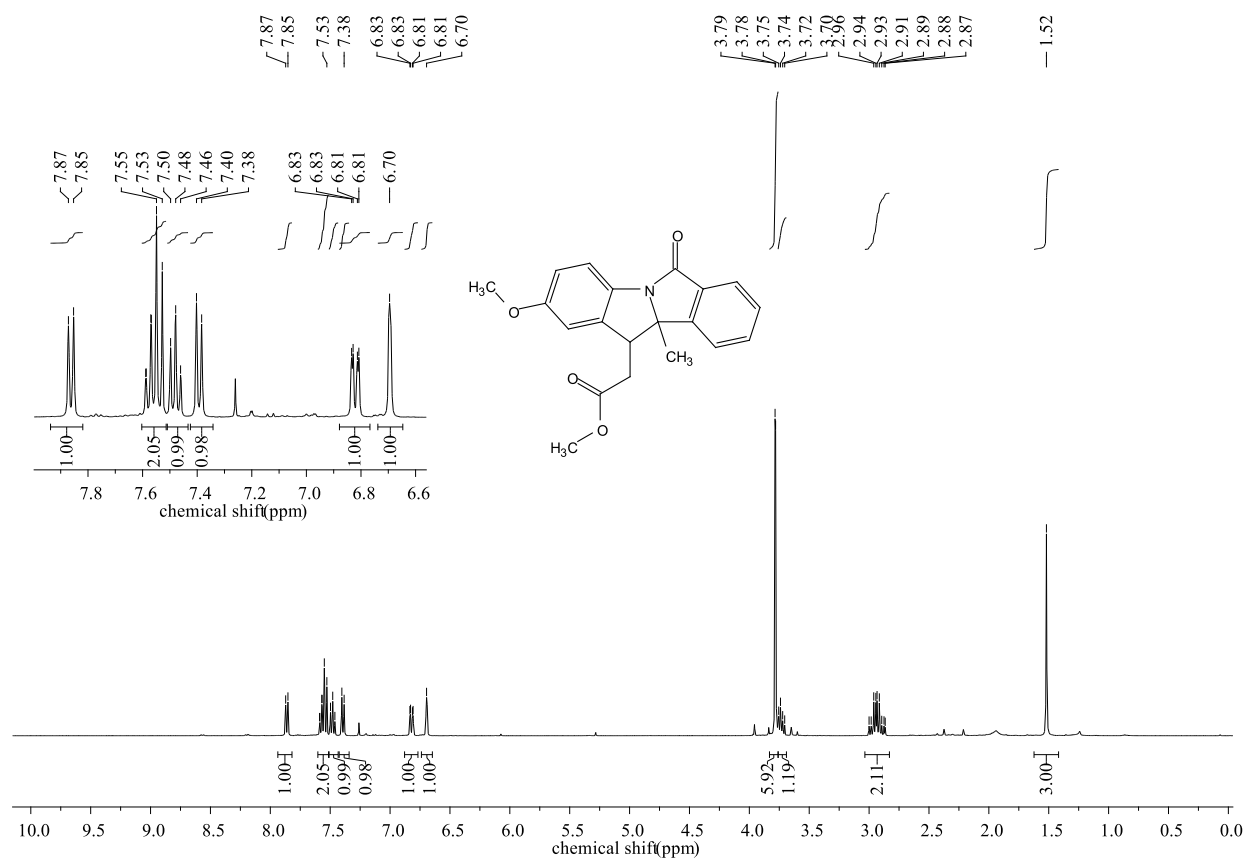

<sup>13</sup>C NMR Spectra of compound **24** (100 MHz, CDCl<sub>3</sub>)

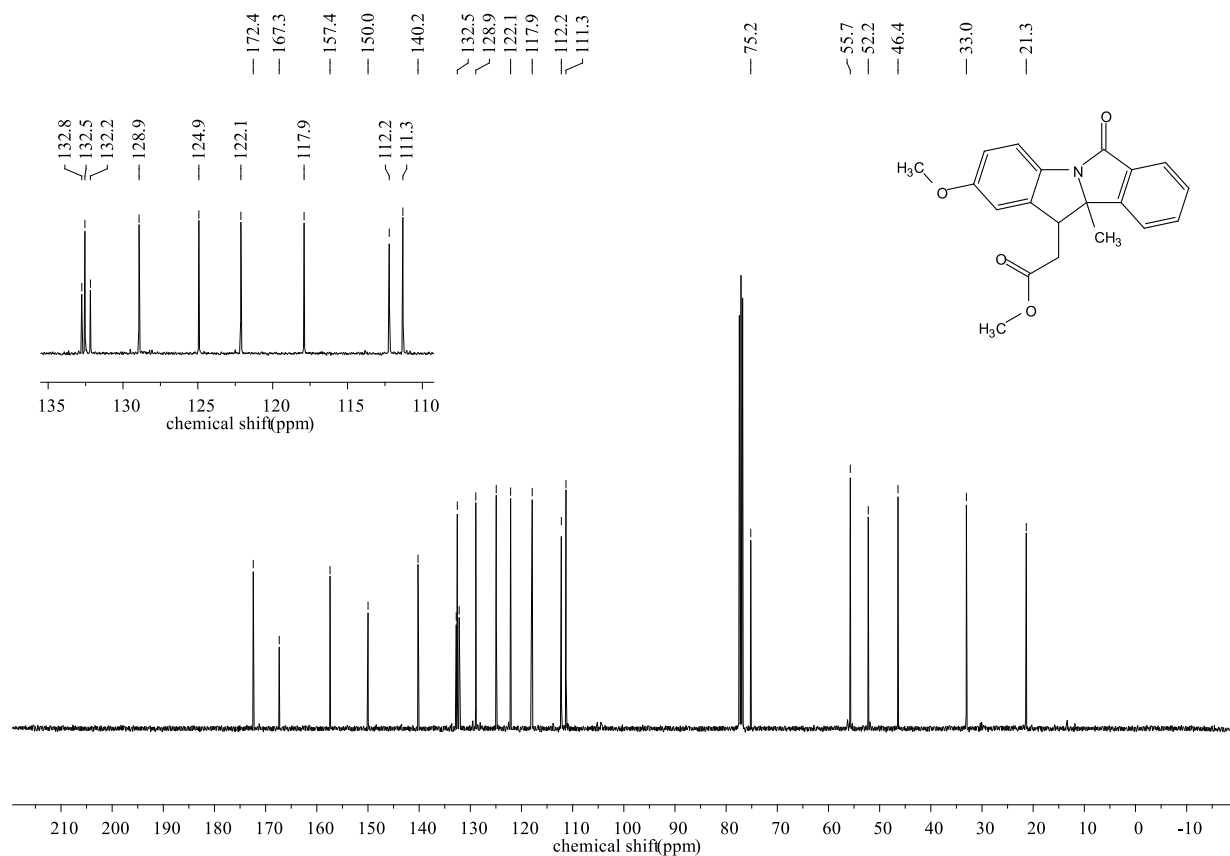

<sup>1</sup>H NMR Spectra of compound **24A** (400 MHz, CDCl<sub>3</sub>)

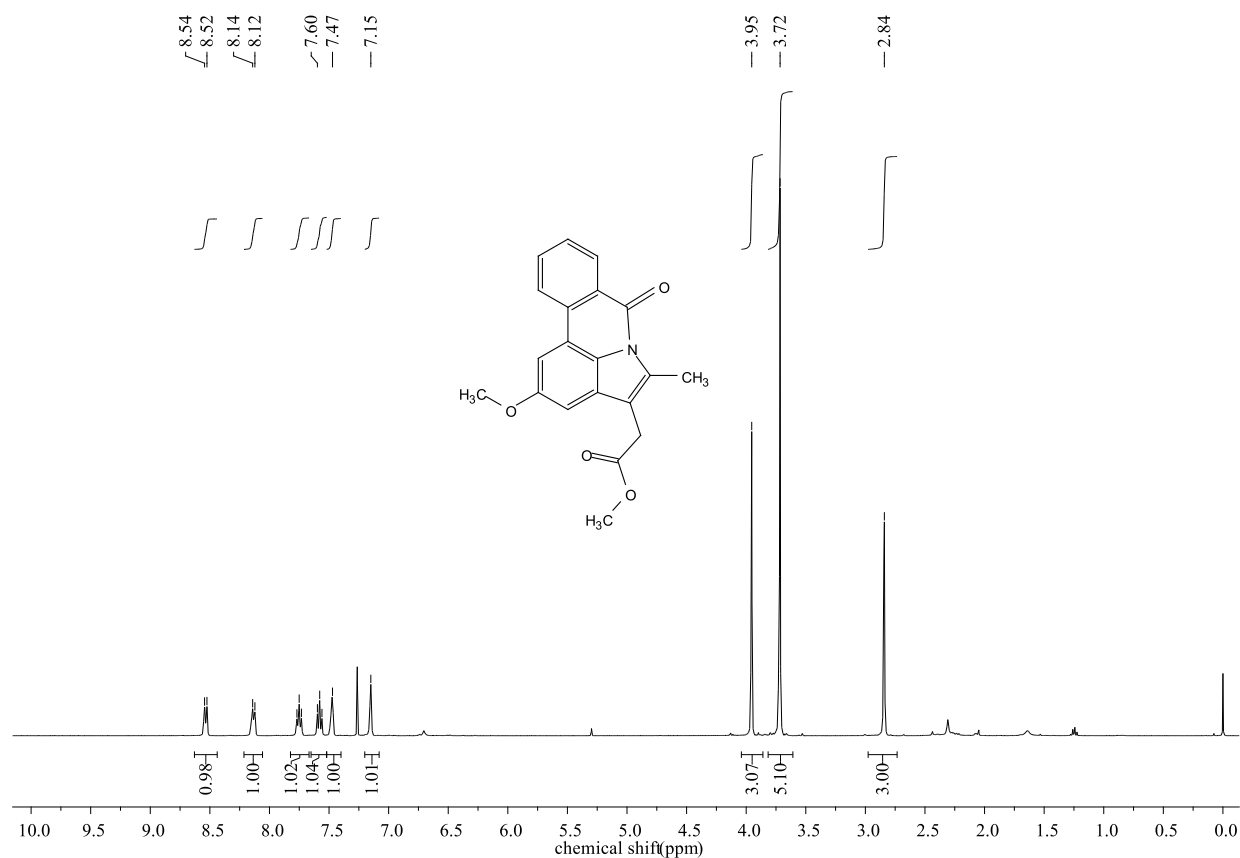

<sup>13</sup>C NMR Spectra of compound **24A** (125 MHz, CDCl<sub>3</sub>)

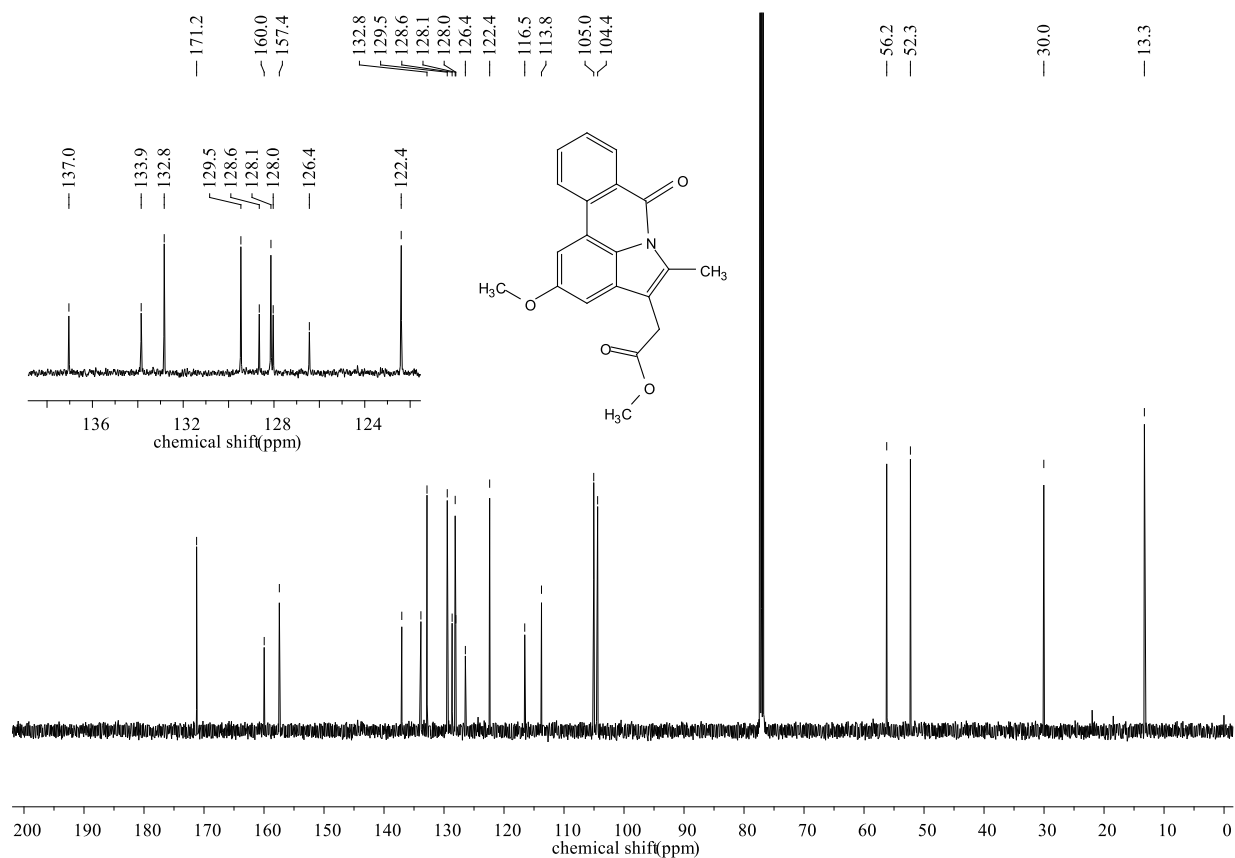

<sup>1</sup>H NMR Spectra of compound **25A** (500 MHz, CDCl<sub>3</sub>)

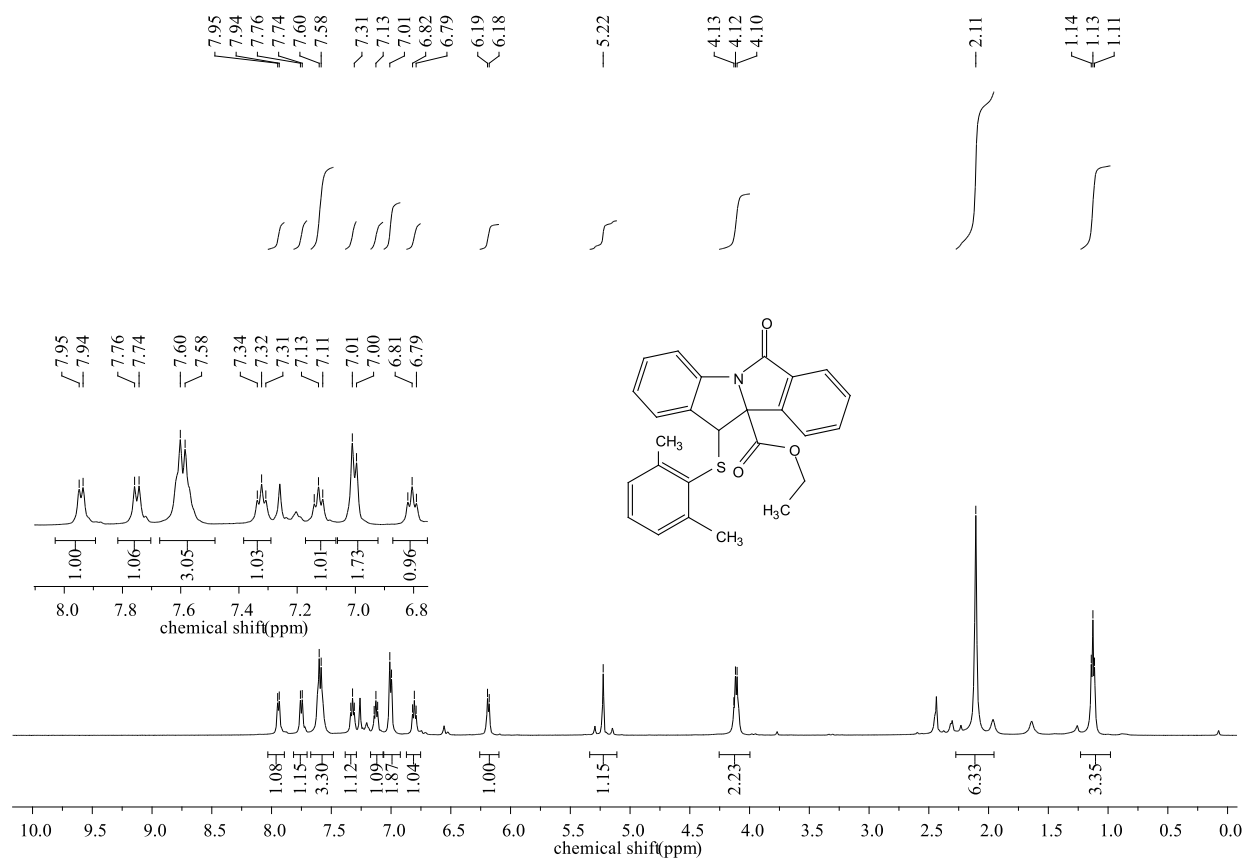

<sup>13</sup>C NMR Spectra of compound **25A** (125 MHz, CDCl<sub>3</sub>)

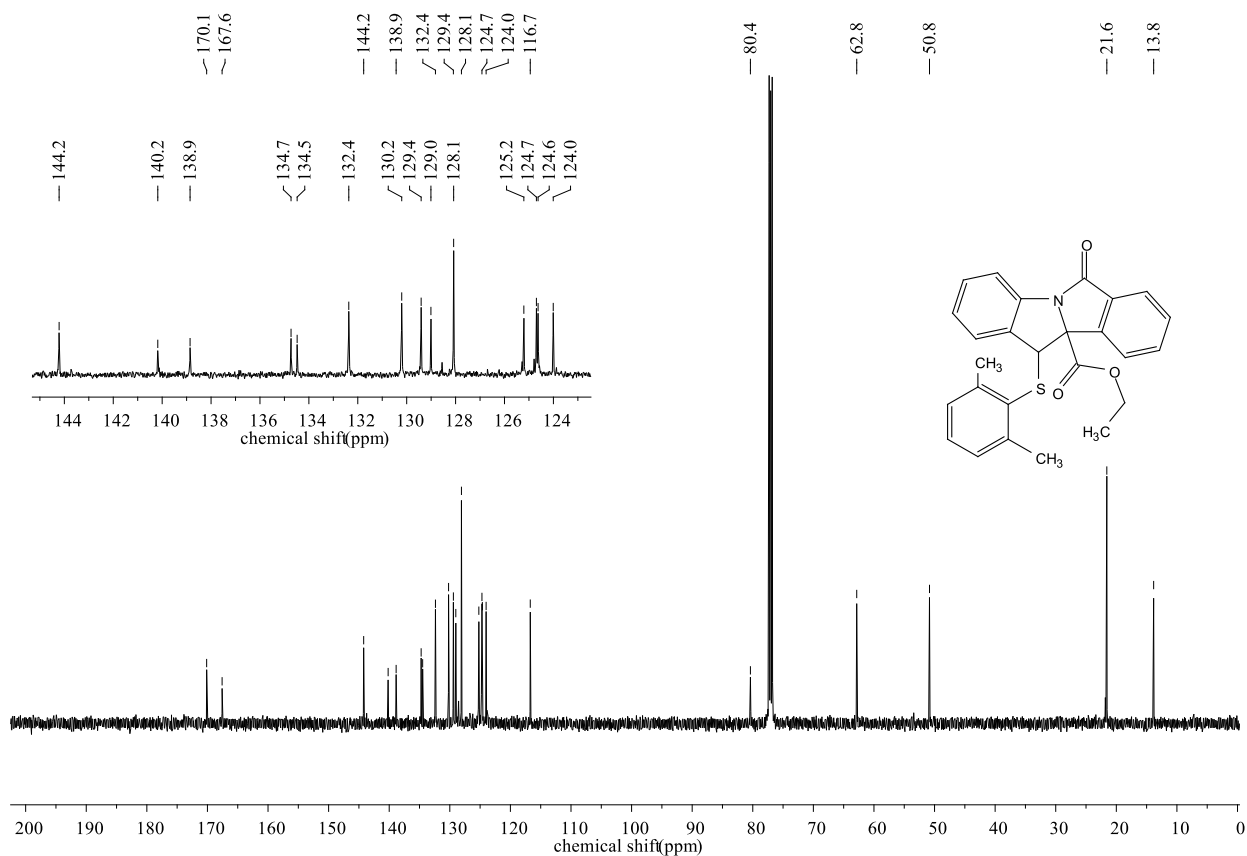

<sup>1</sup>H NMR Spectra of compound **26** (400 MHz, CDCl<sub>3</sub>)

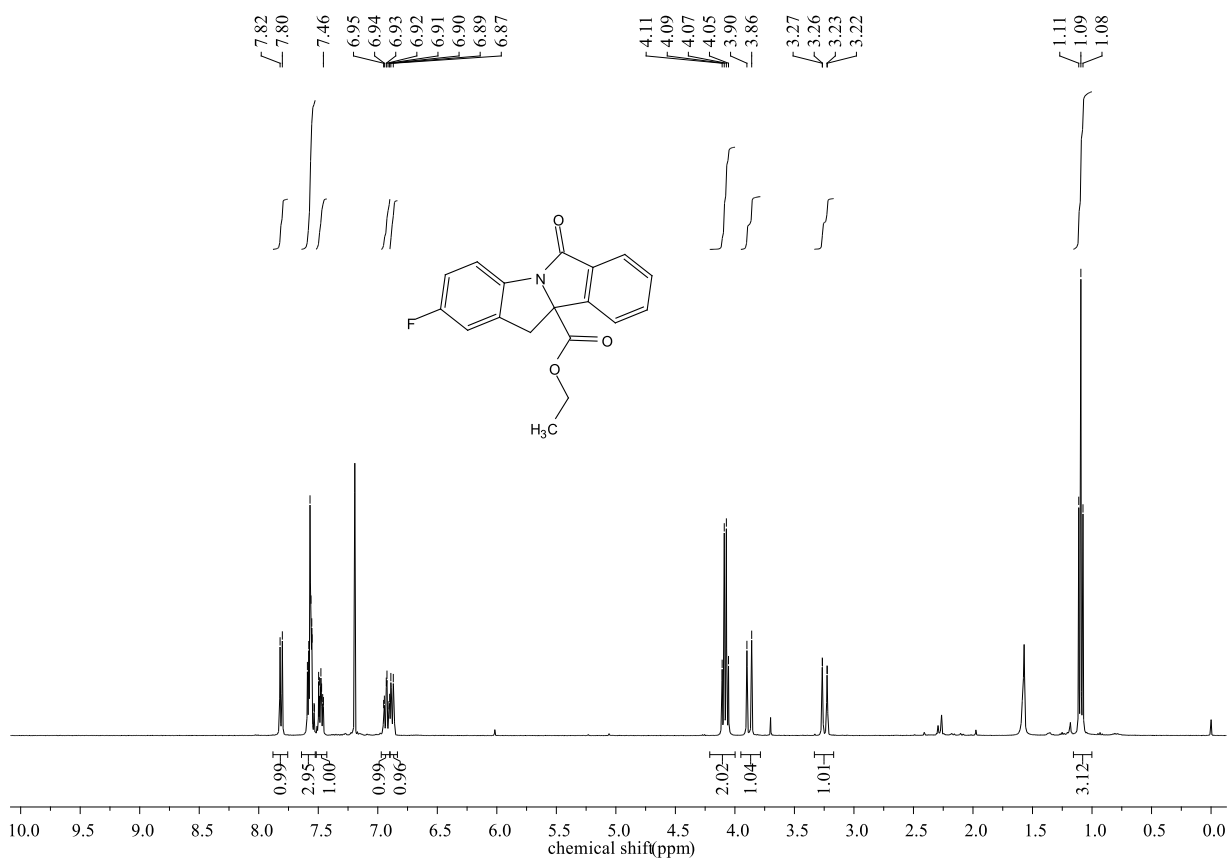

$^{13}\text{C}$  NMR Spectra of compound **26** (100 MHz,  $\text{CDCl}_3$ )

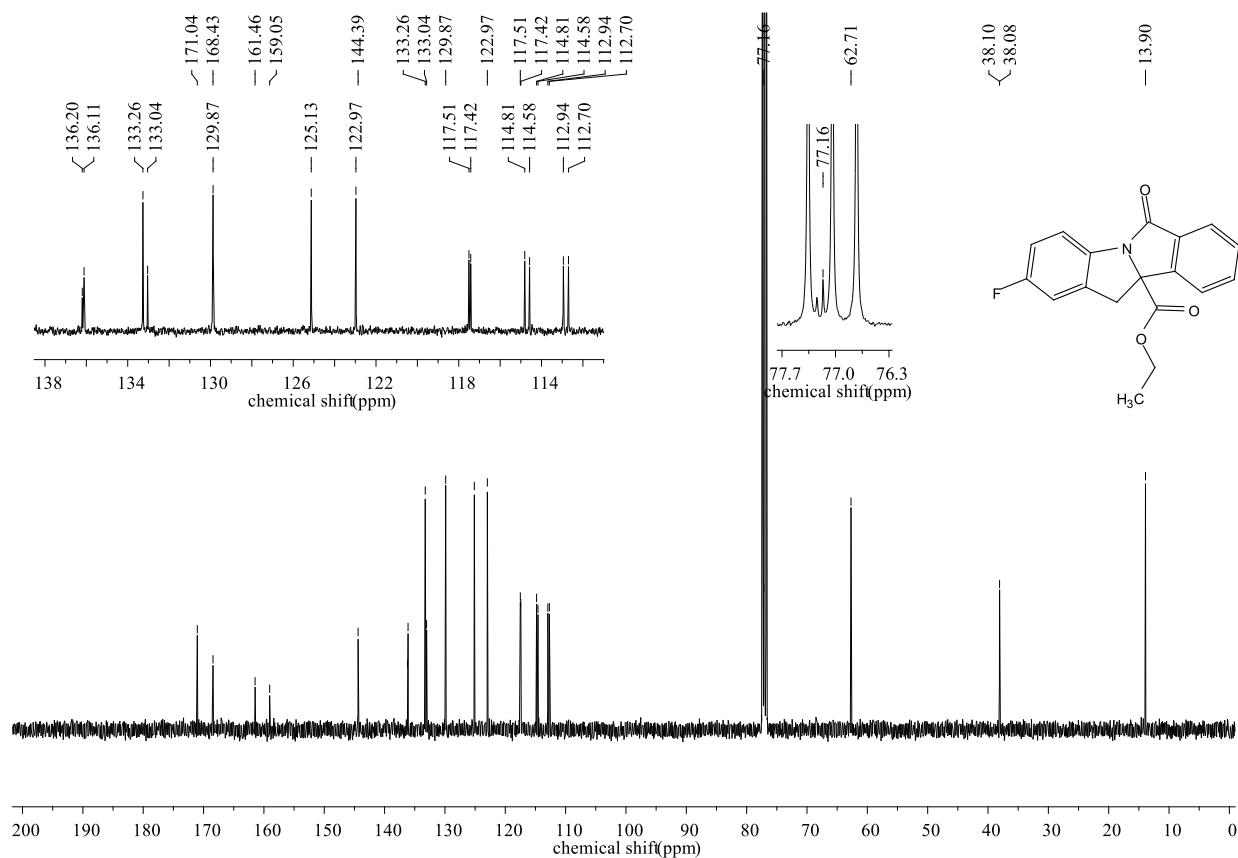

$^{19}\text{F}$  NMR Spectra of compound **26** (300 MHz,  $\text{CDCl}_3$ )

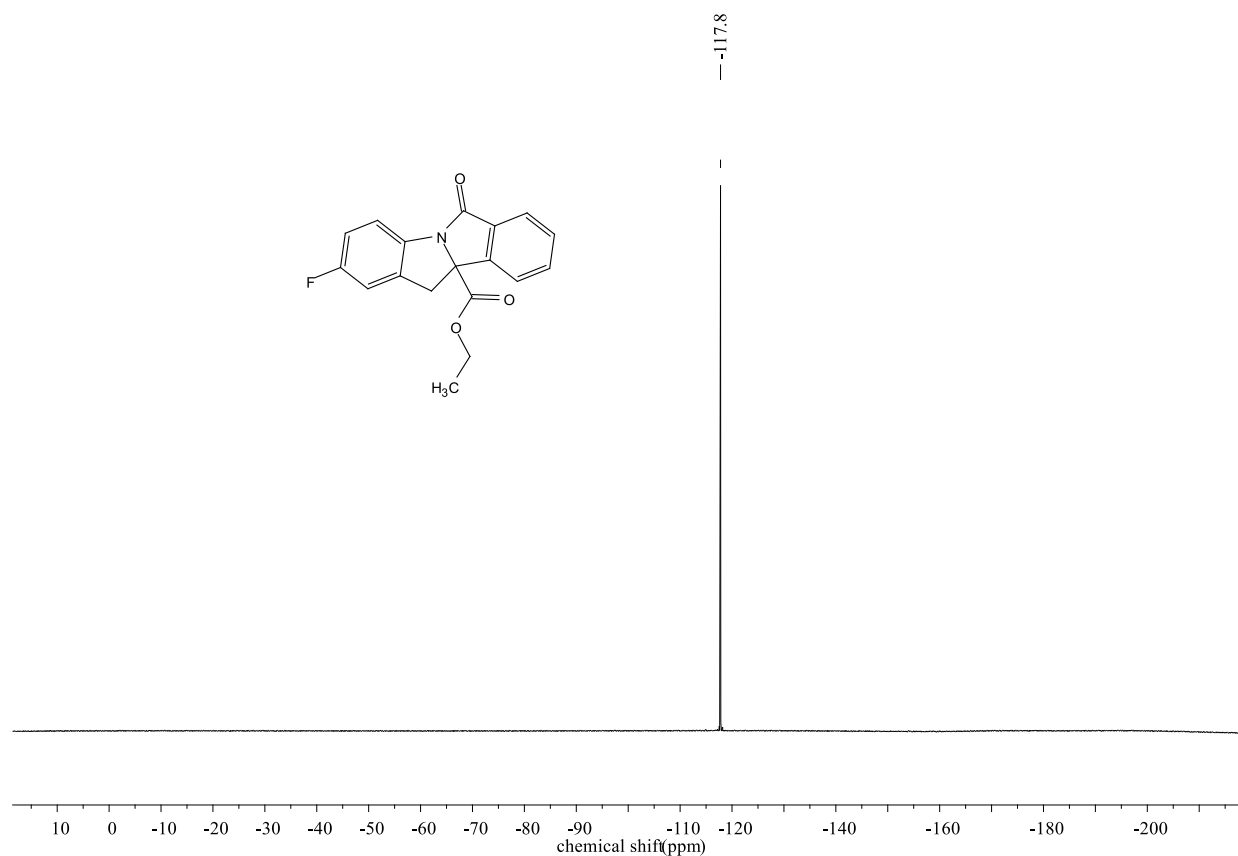

<sup>1</sup>H NMR Spectra of compound **27** (500 MHz, CDCl<sub>3</sub>)

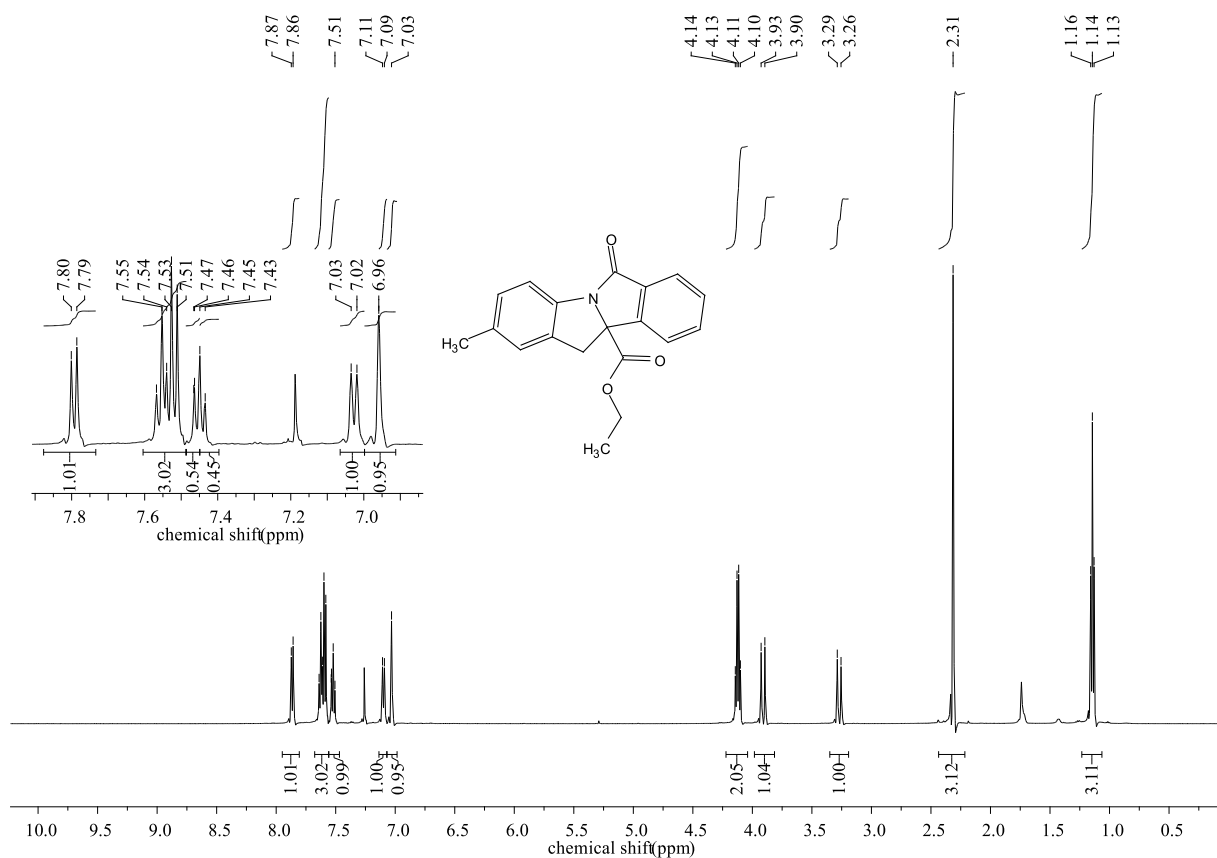

<sup>13</sup>C NMR Spectra of compound **27** (125 MHz, CDCl<sub>3</sub>)

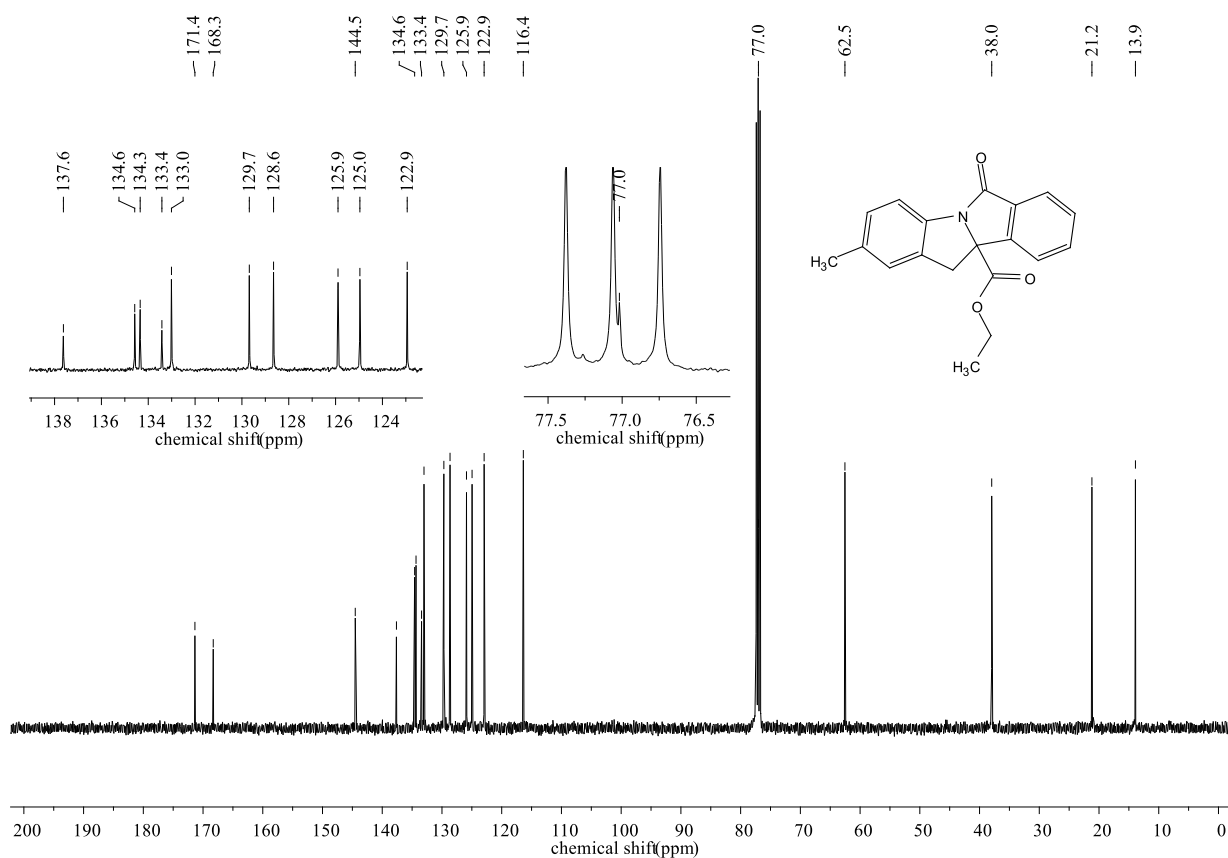

<sup>1</sup>H NMR Spectra of compound **28** (500 MHz, CDCl<sub>3</sub>)

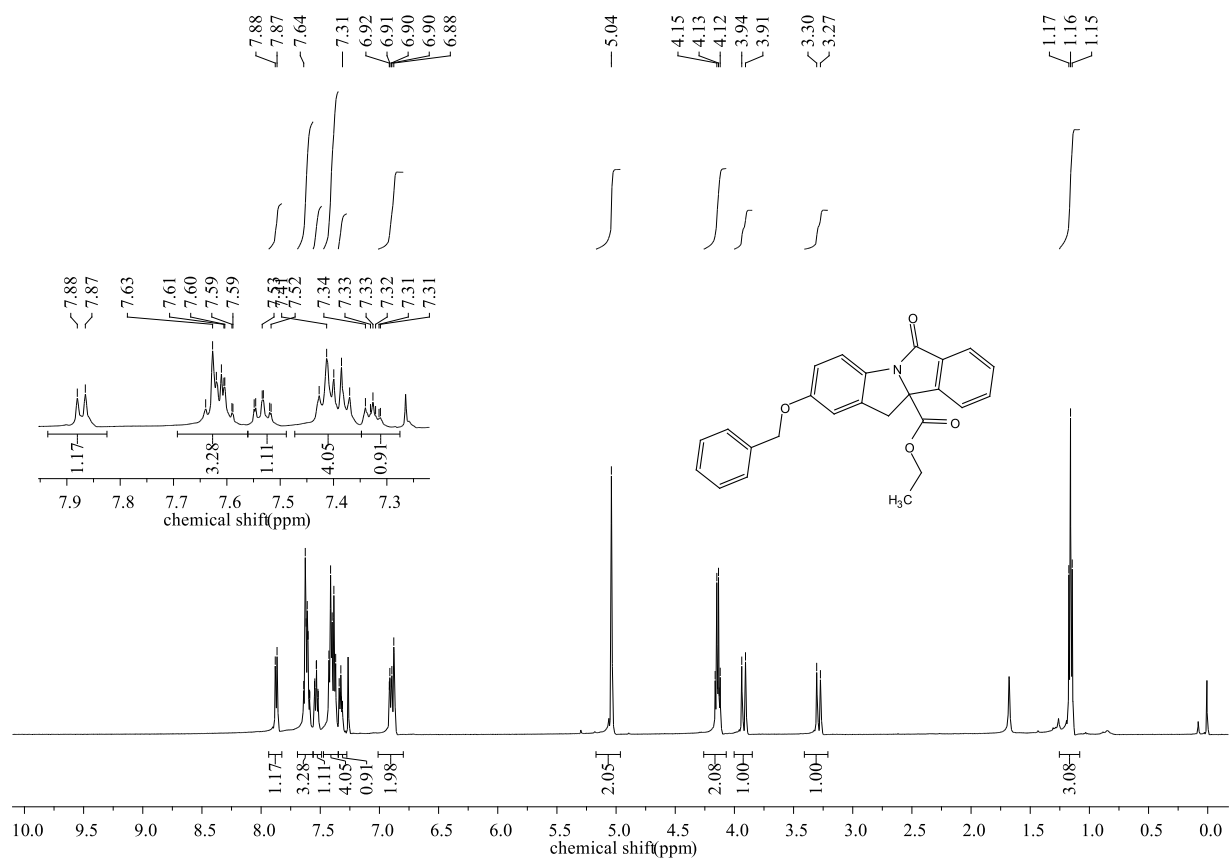

<sup>13</sup>C NMR Spectra of compound **28** (125 MHz, CDCl<sub>3</sub>)

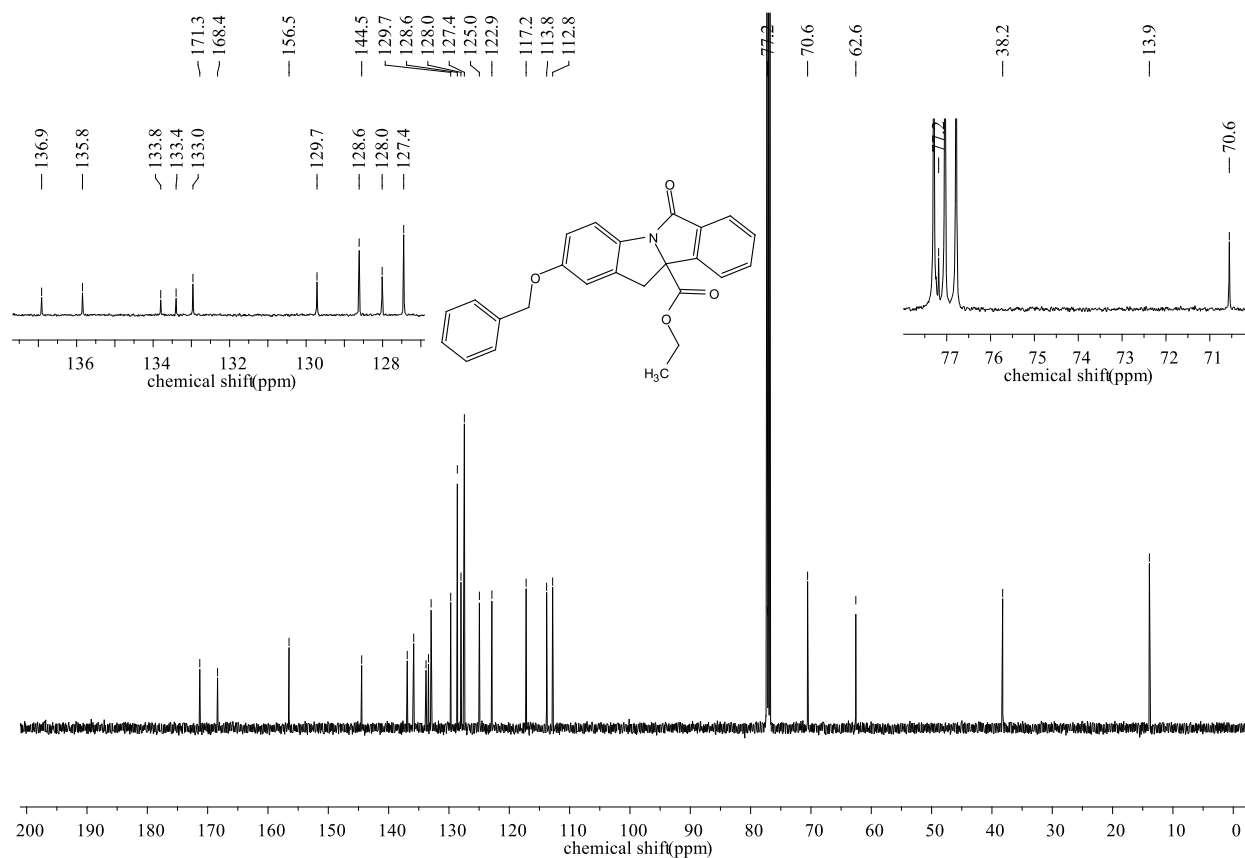

<sup>1</sup>H NMR Spectra of compound **29** (500 MHz, CDCl<sub>3</sub>)

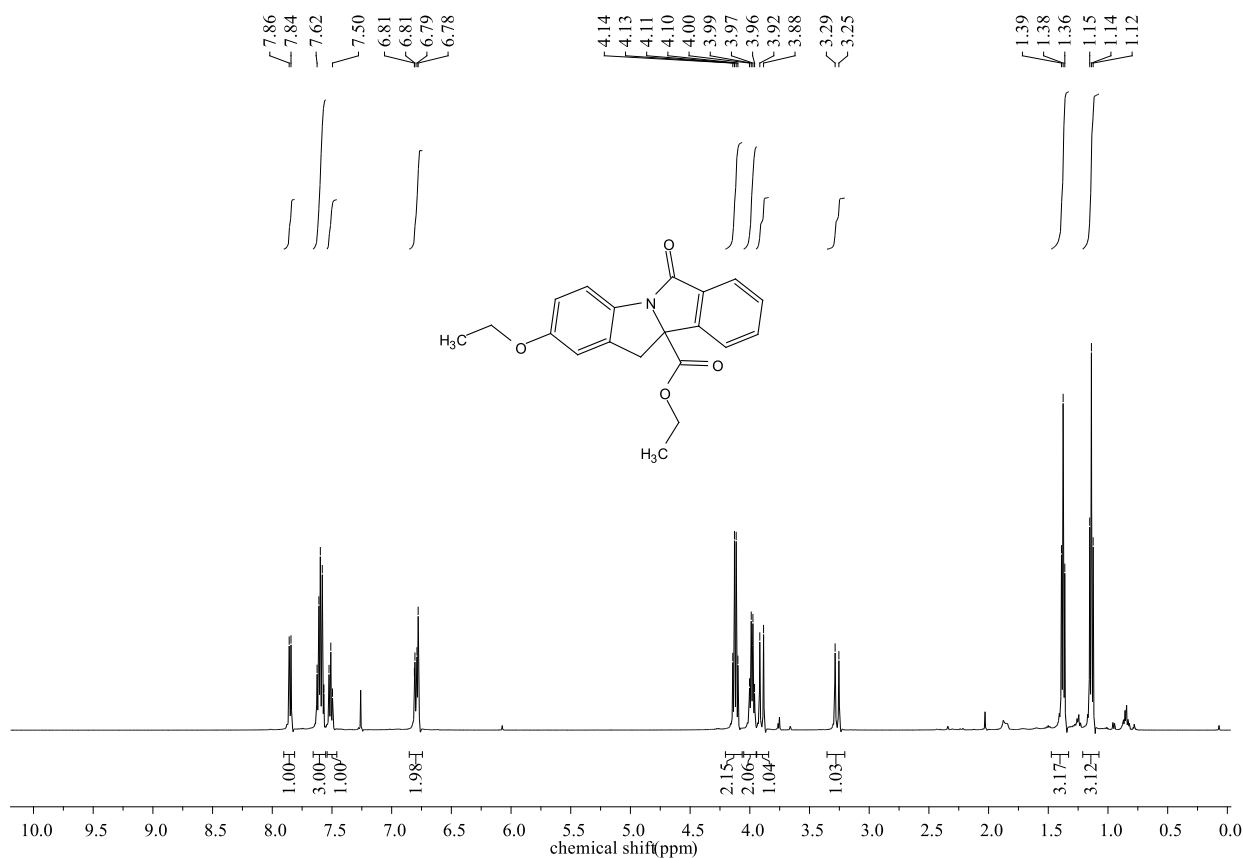

<sup>13</sup>C NMR Spectra of compound **29** (100 MHz, CDCl<sub>3</sub>)

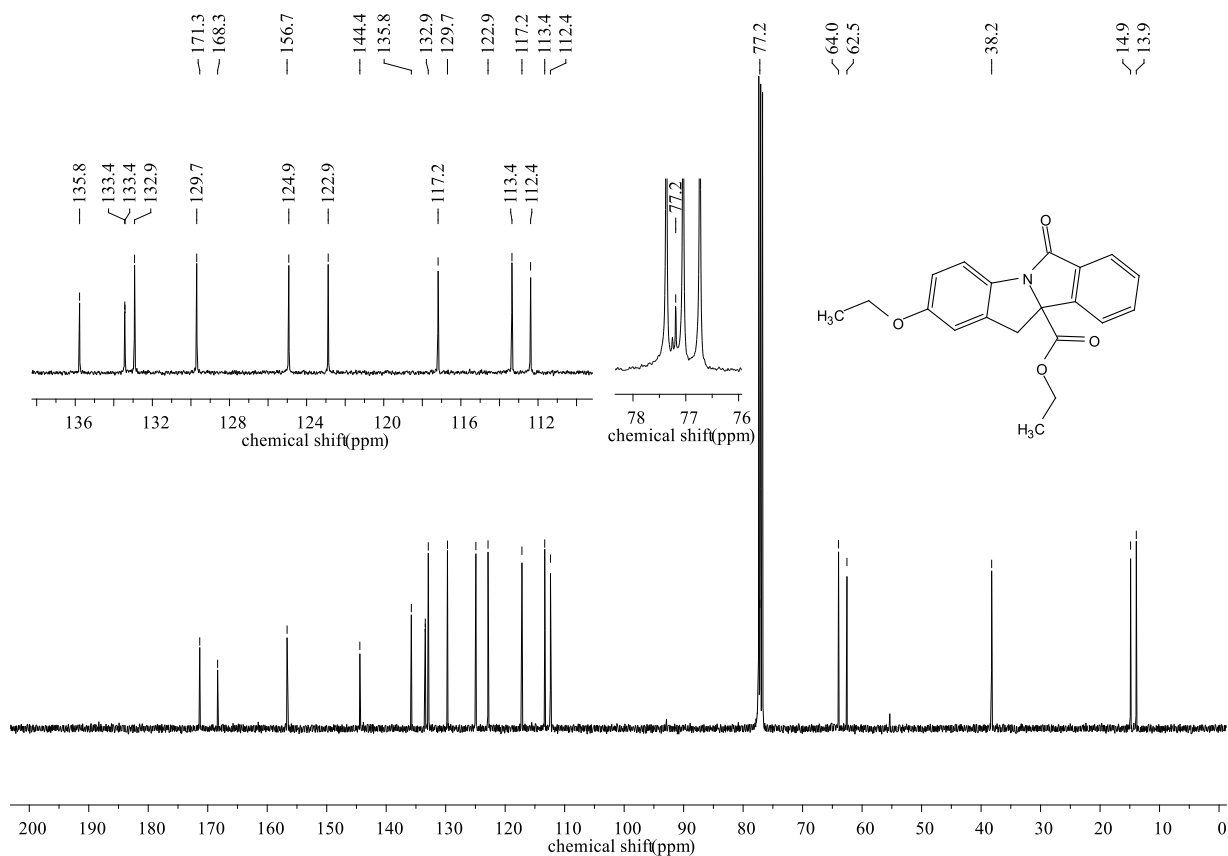

<sup>1</sup>H NMR Spectra of compound **30** (400 MHz, CDCl<sub>3</sub>)

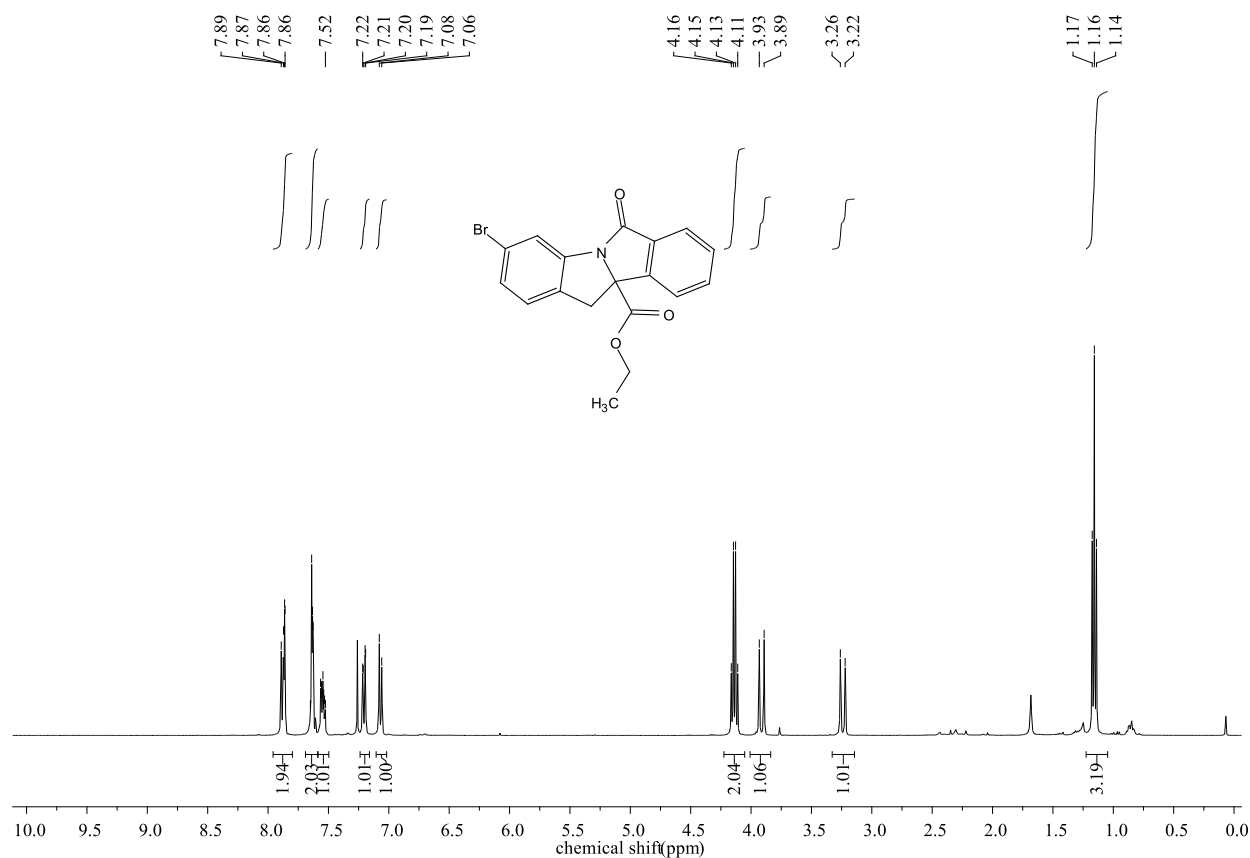

<sup>13</sup>C NMR Spectra of compound **30** (100 MHz, CDCl<sub>3</sub>)

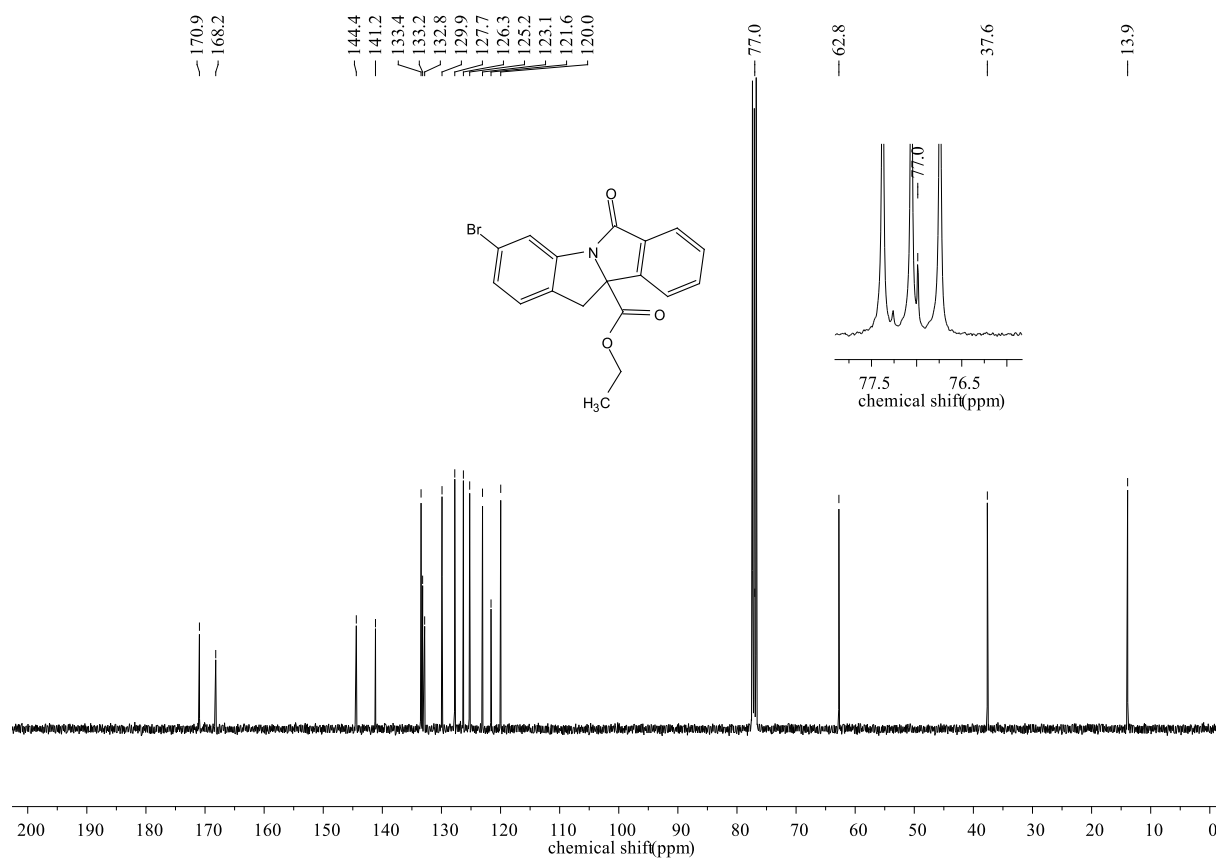

<sup>1</sup>H NMR Spectra of compound **31** (500 MHz, CDCl<sub>3</sub>)

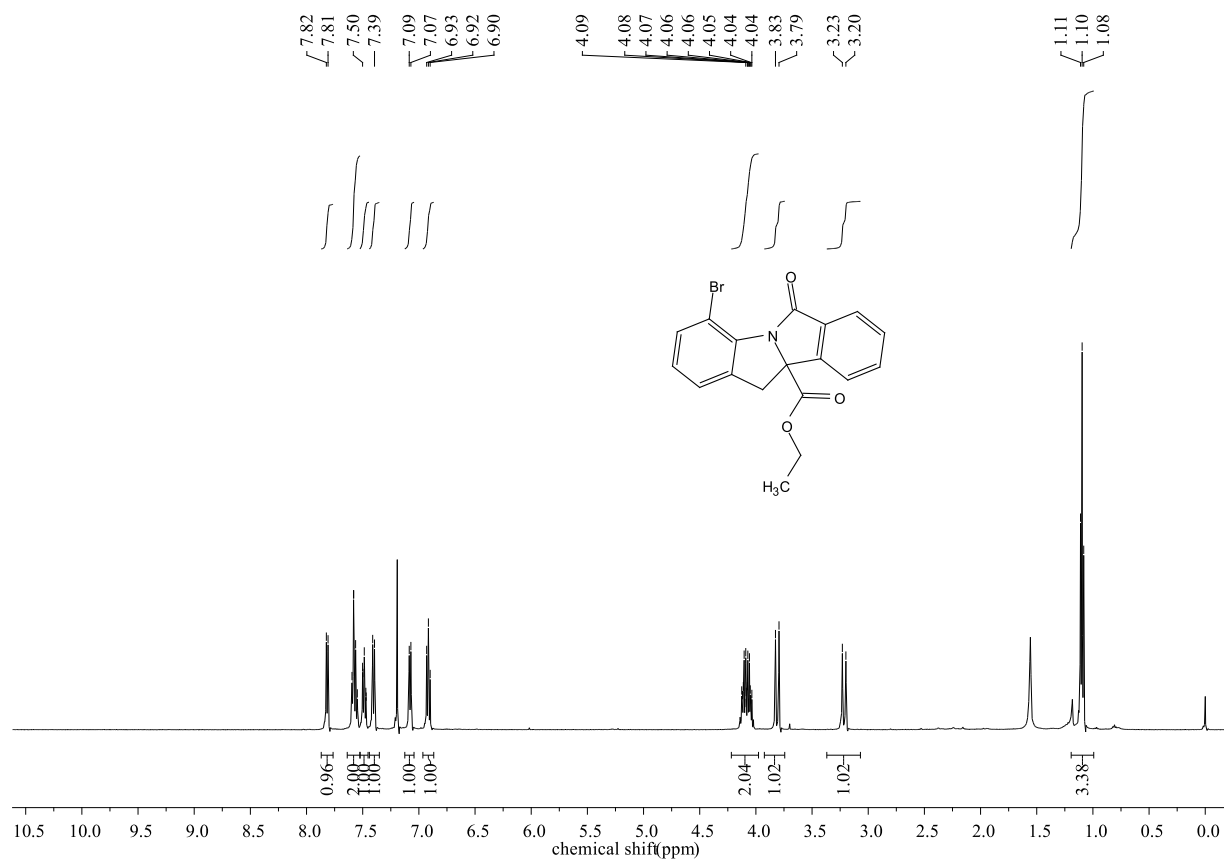

<sup>13</sup>C NMR Spectra of compound **31** (100 MHz, CDCl<sub>3</sub>)

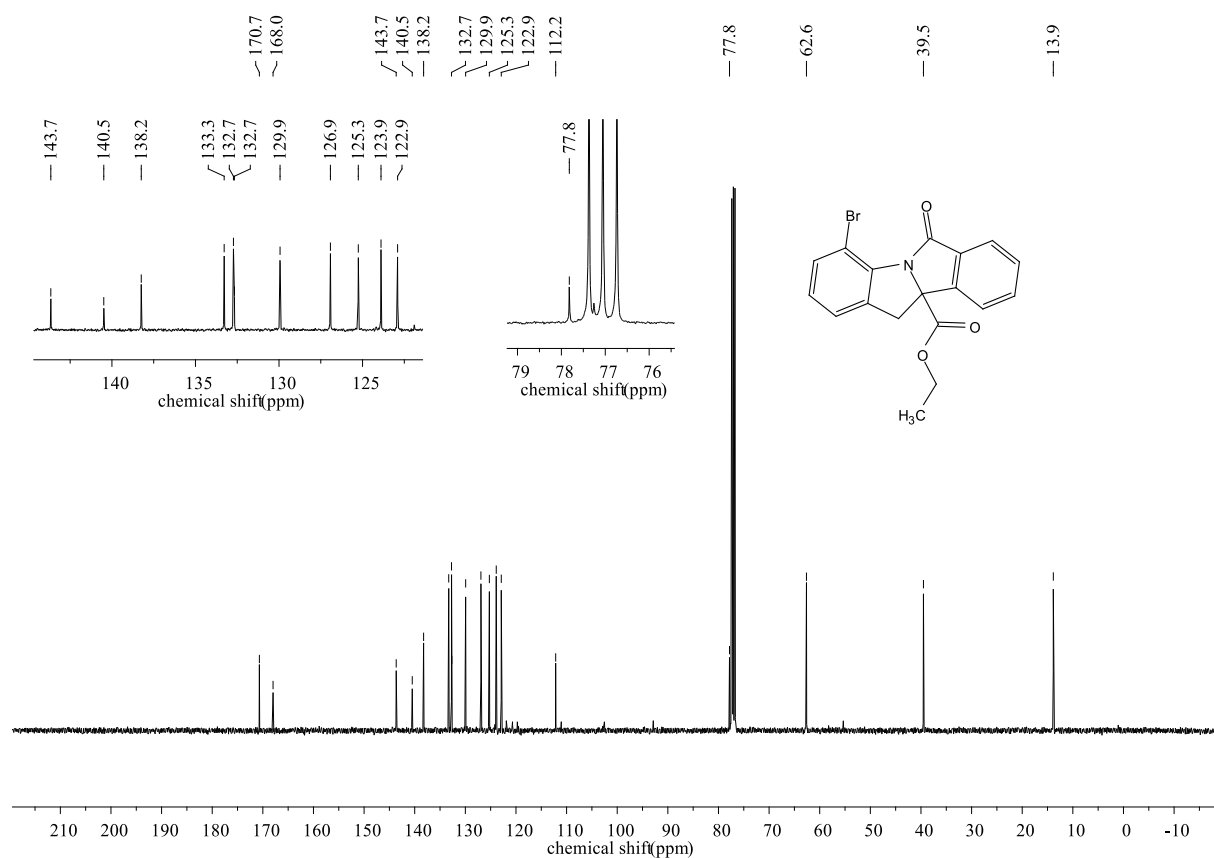

<sup>1</sup>H NMR Spectra of compound **32** (400 MHz, CDCl<sub>3</sub>)

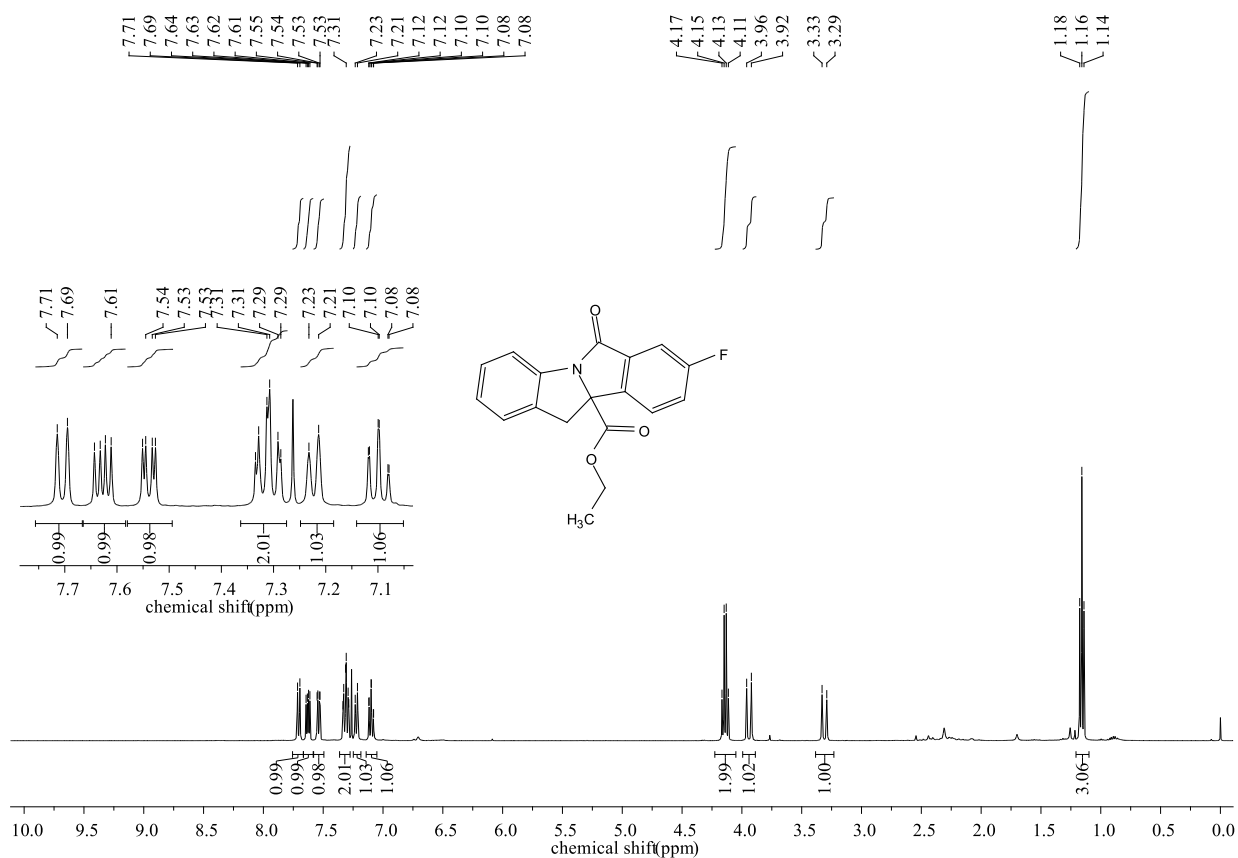

<sup>13</sup>C NMR Spectra of compound **32** (125 MHz, CDCl<sub>3</sub>)

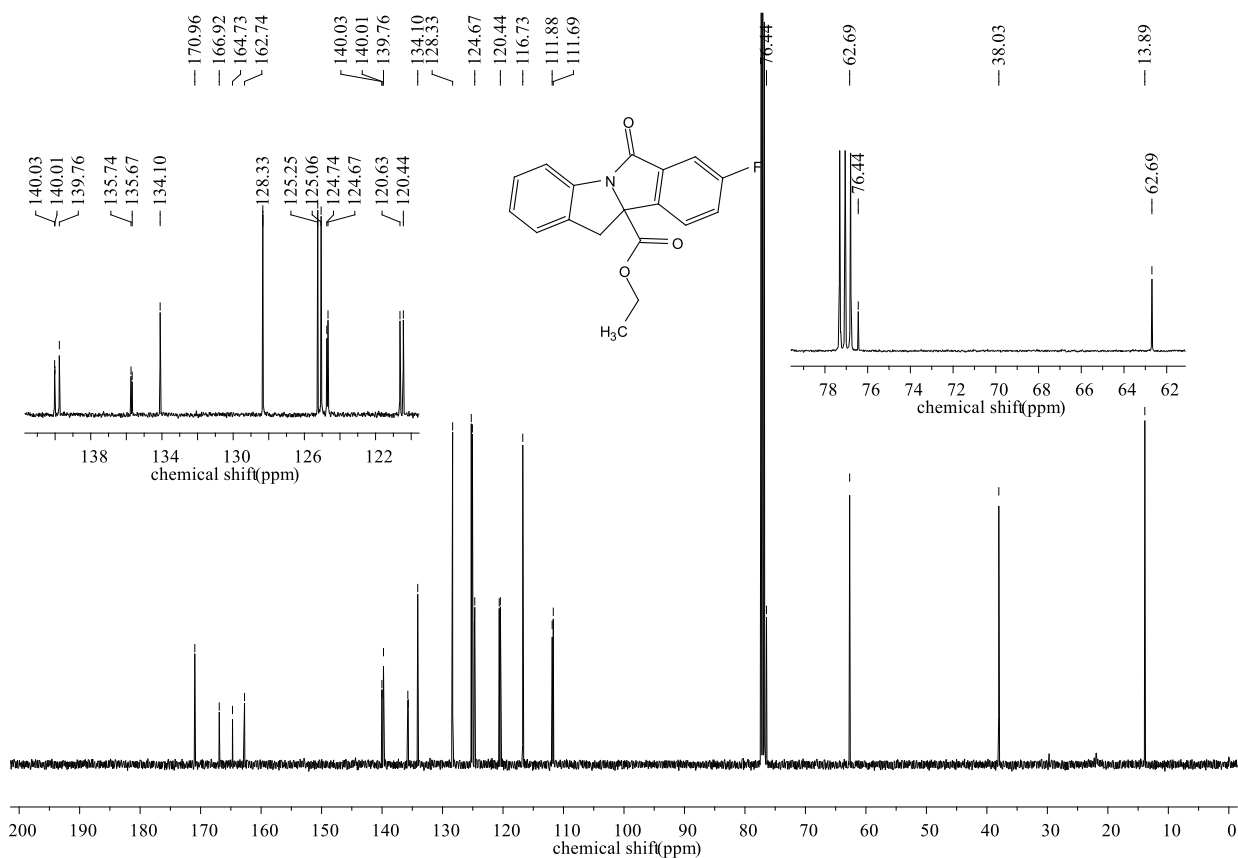

$^{19}\text{F}$  NMR Spectra of compound **32** (375 MHz,  $\text{CDCl}_3$ )

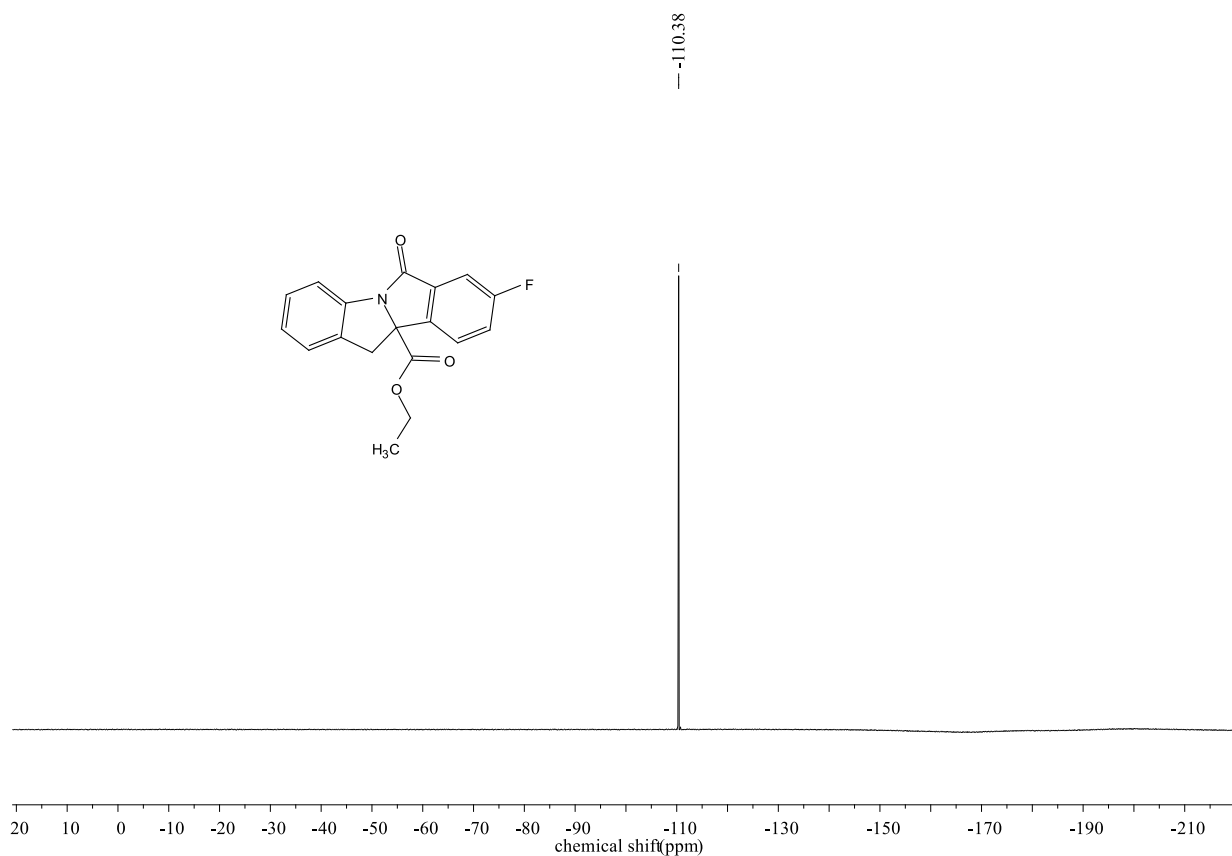

$^1\text{H}$  NMR Spectra of compound **33** (400 MHz,  $\text{CDCl}_3$ )

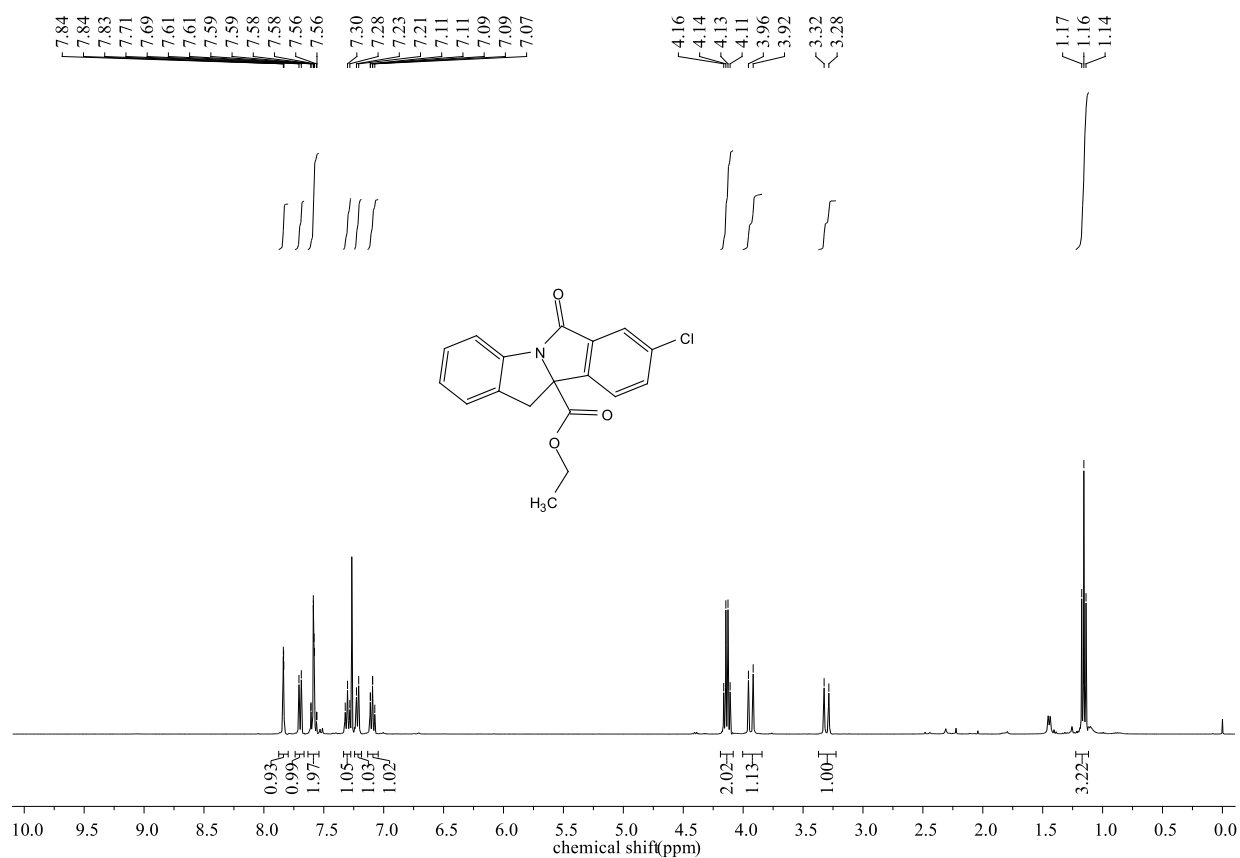

<sup>13</sup>C NMR Spectra of compound **33** (100 MHz, CDCl<sub>3</sub>)

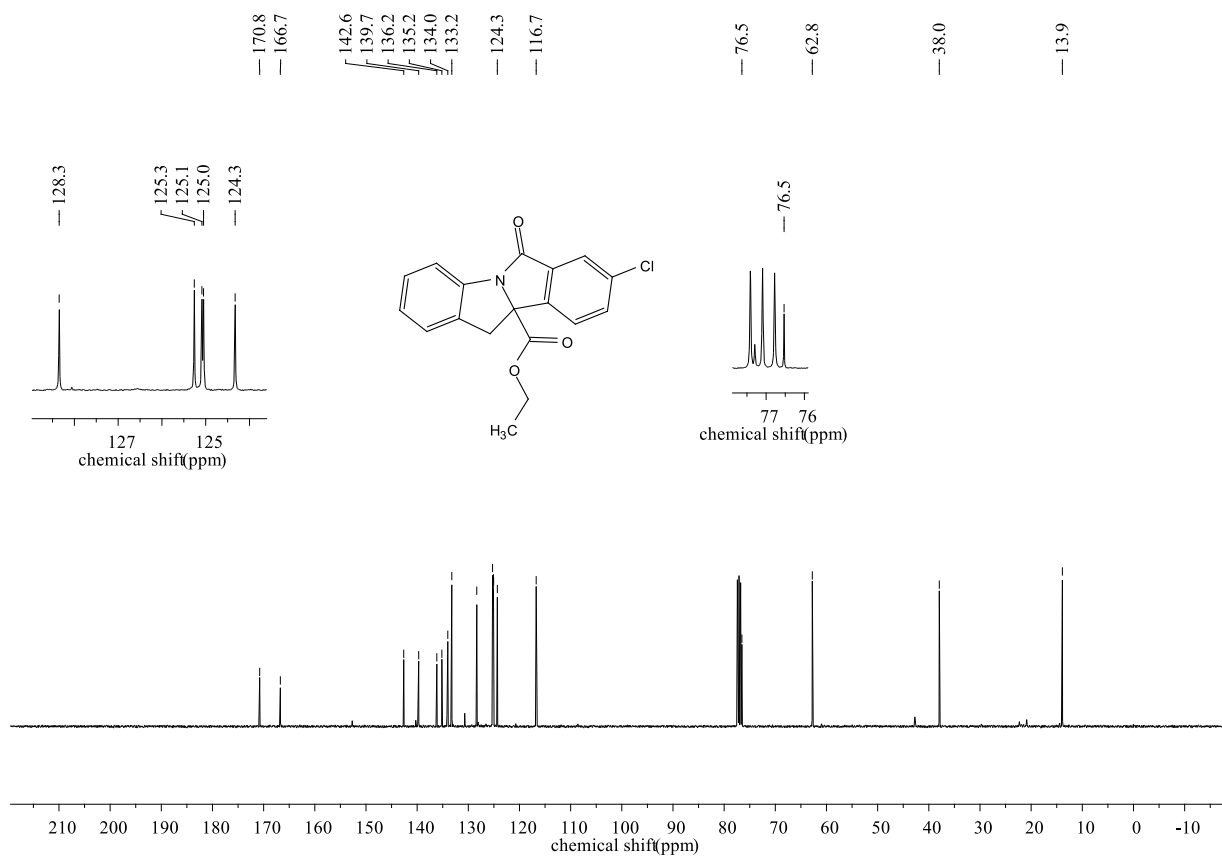

<sup>1</sup>H NMR Spectra of compound **34** (500 MHz, CDCl<sub>3</sub>)

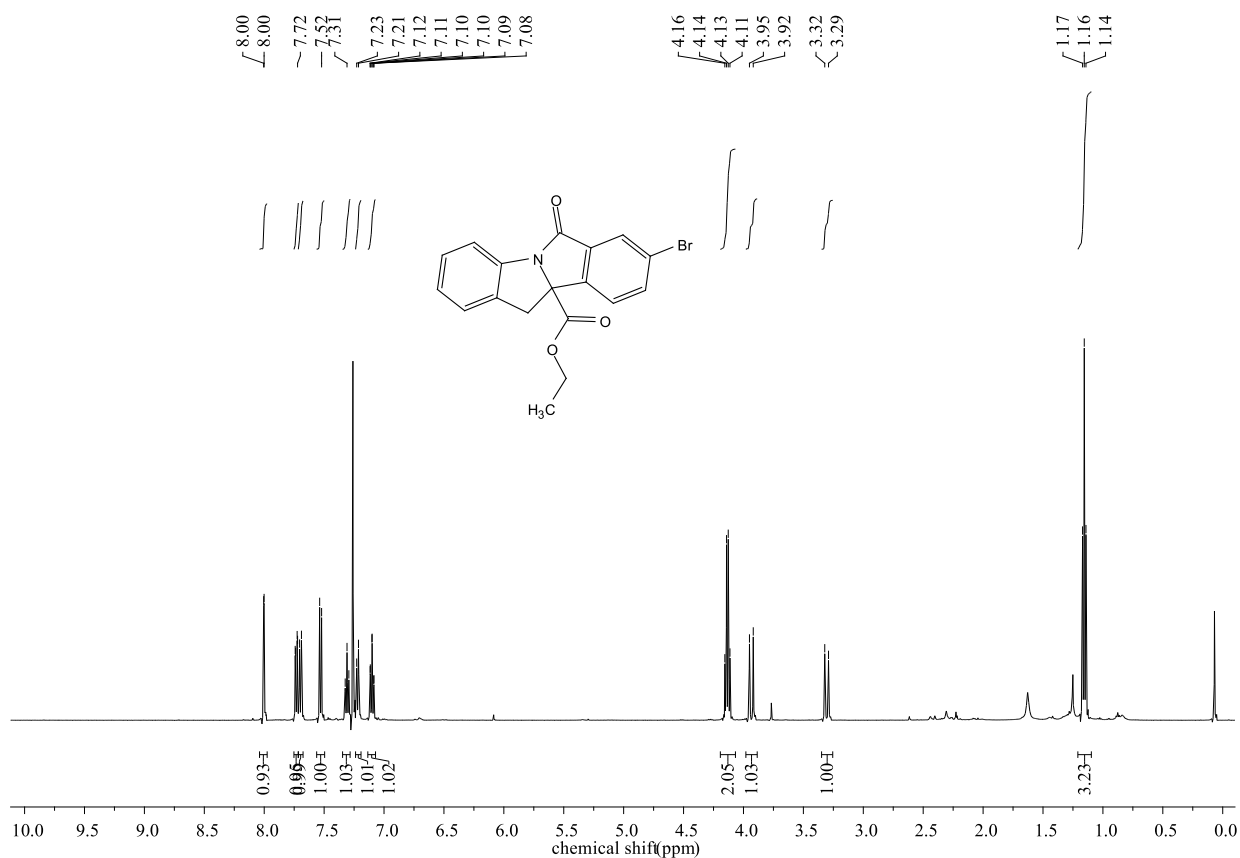

$^{13}\text{C}$  NMR Spectra of compound **34** (100 MHz,  $\text{CDCl}_3$ )

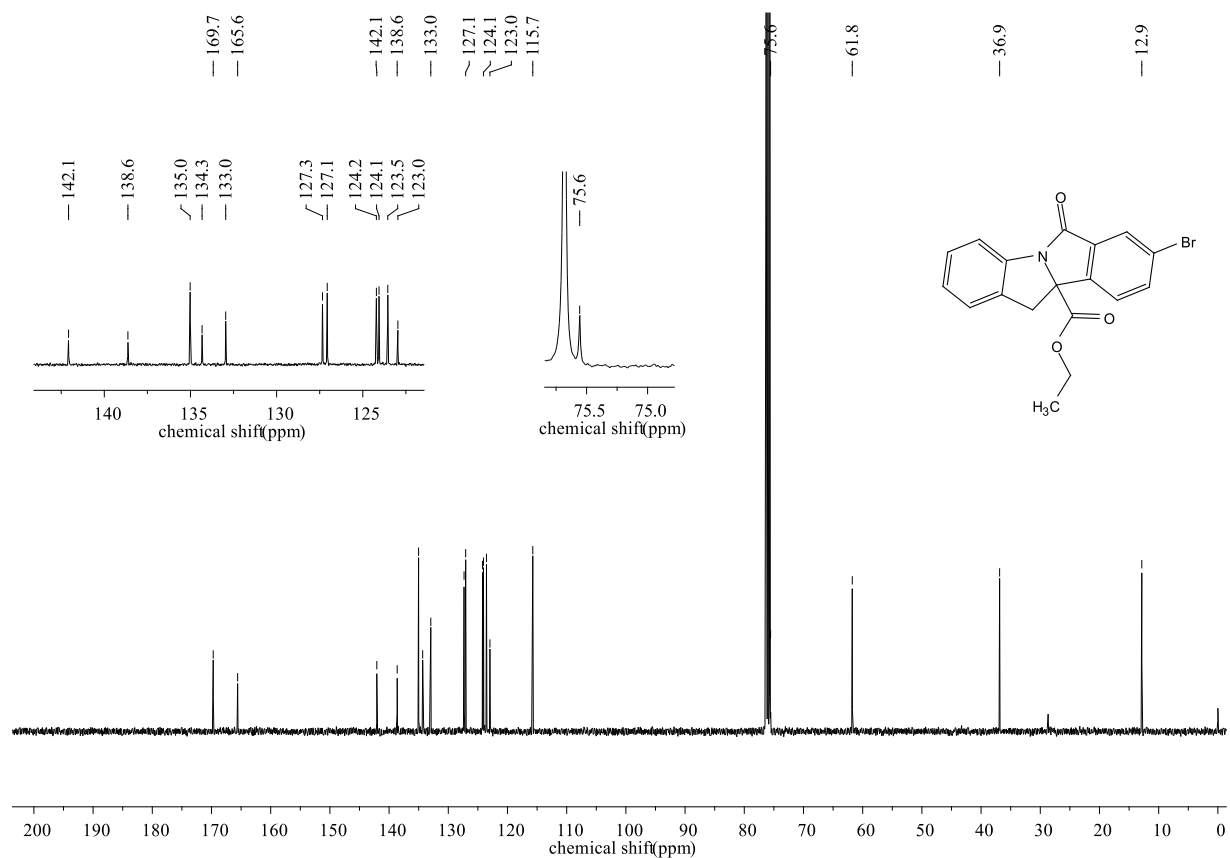

$^1\text{H}$  NMR Spectra of compound **35** (400 MHz,  $\text{CDCl}_3$ )

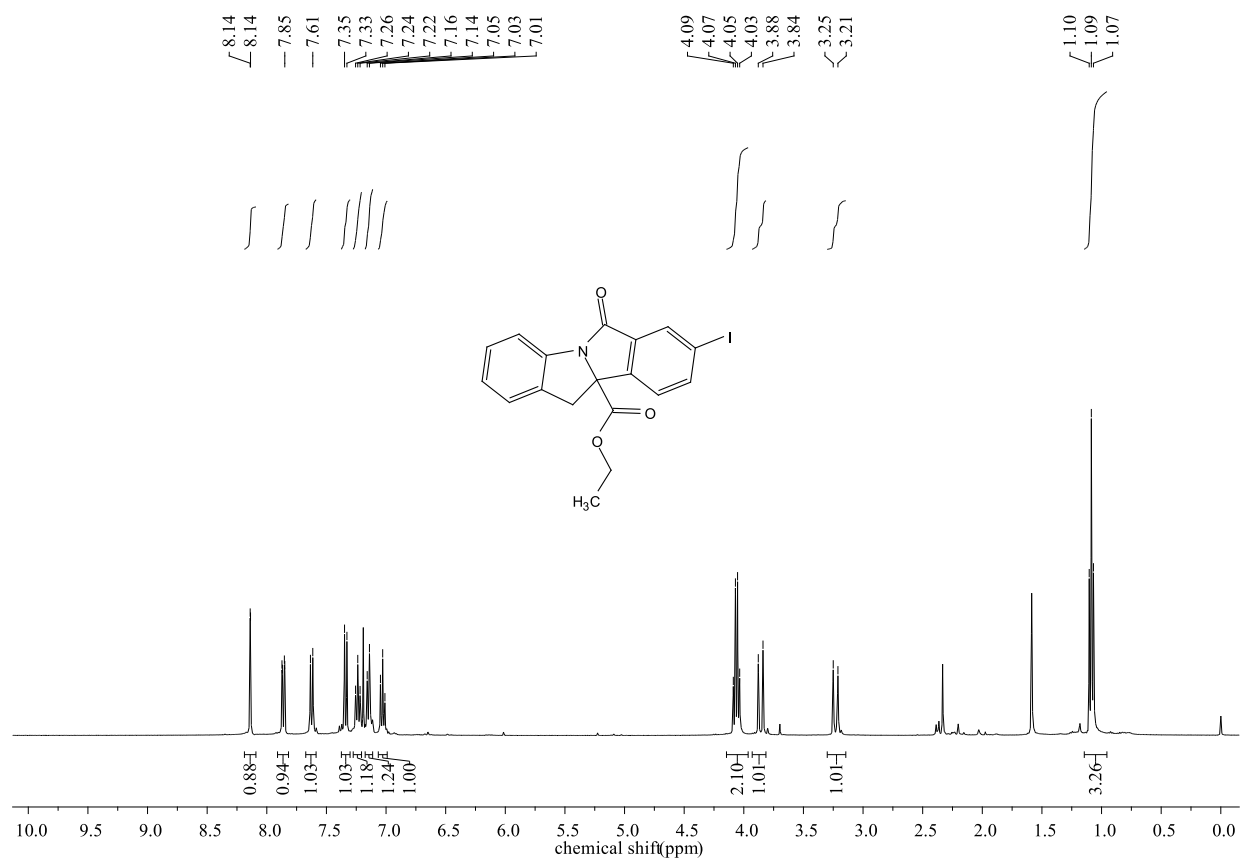

<sup>13</sup>C NMR Spectra of compound **35** (100 MHz, CDCl<sub>3</sub>)

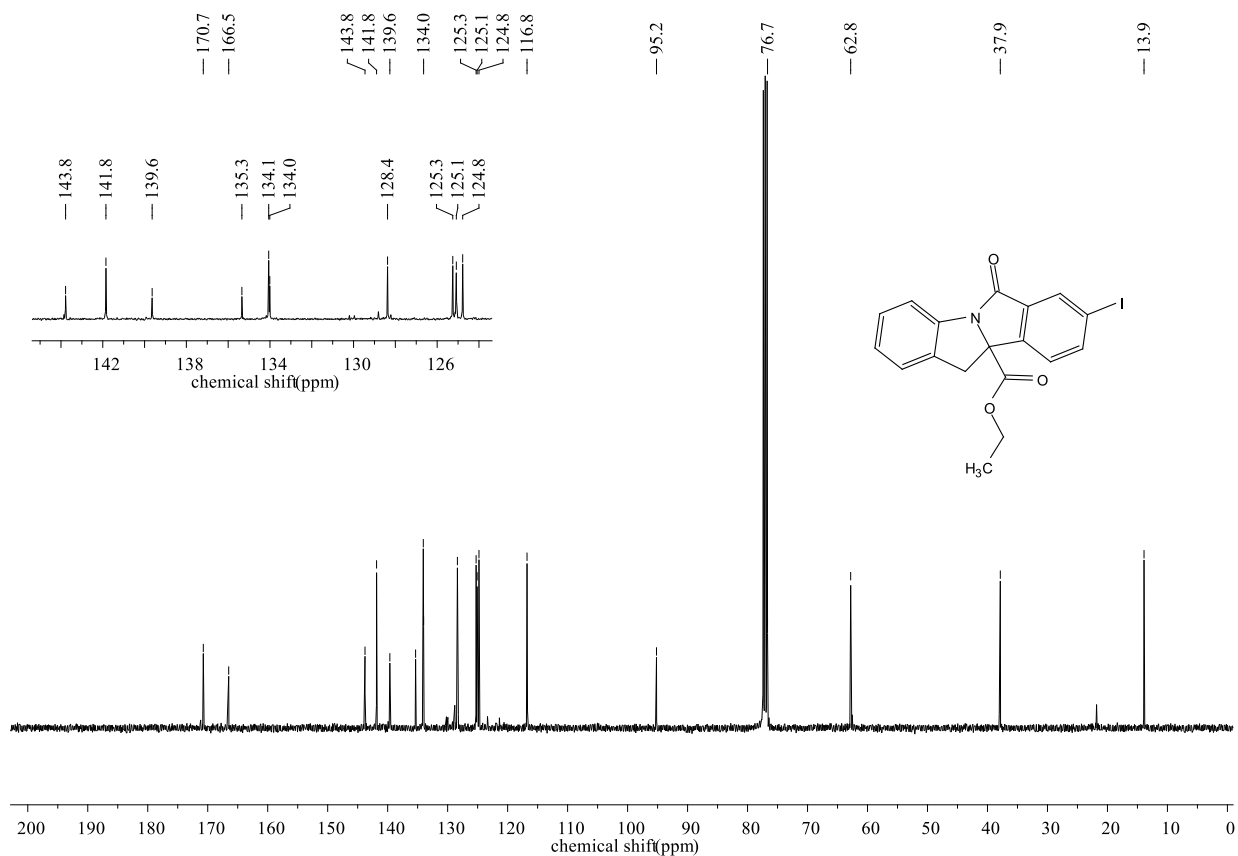

<sup>1</sup>H NMR Spectra of compound **36** (400 MHz, CDCl<sub>3</sub>)

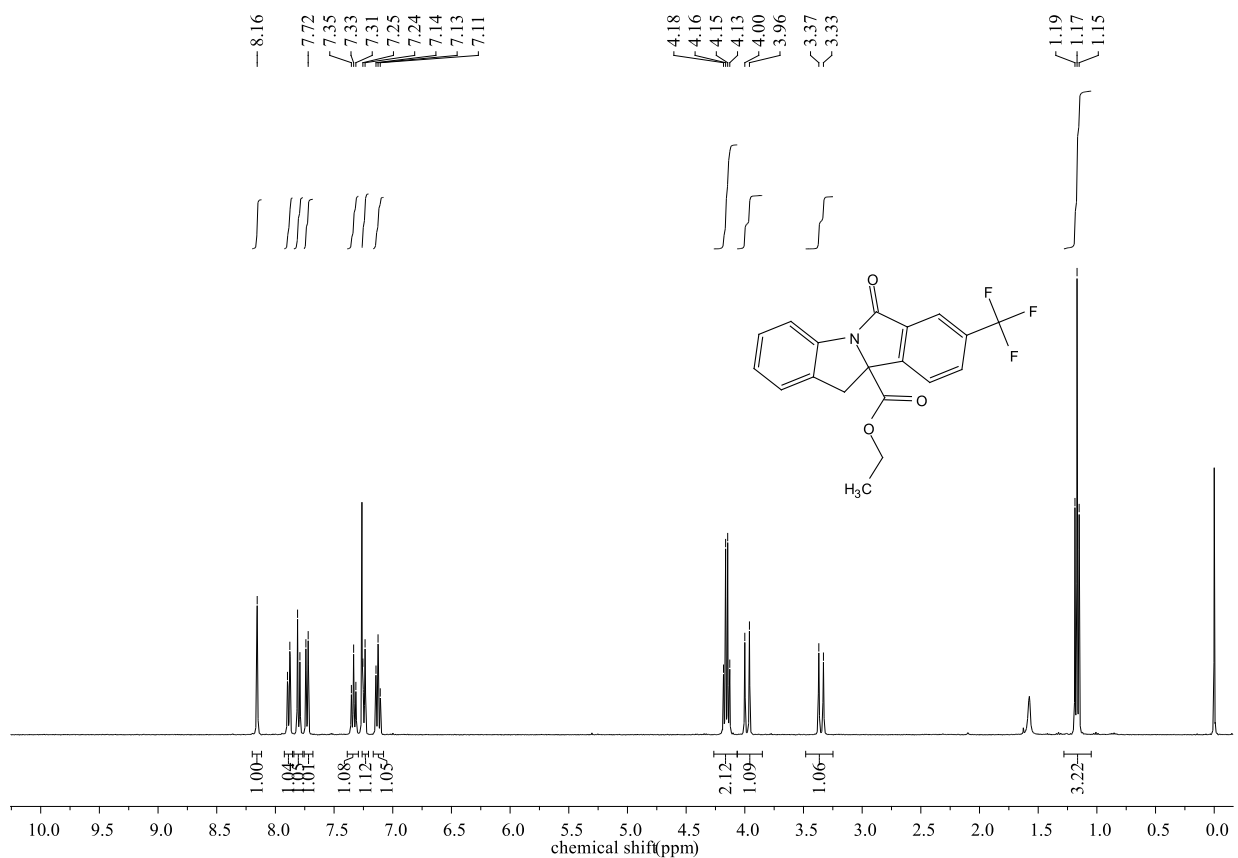

<sup>13</sup>C NMR Spectra of compound **36** (125 MHz, CDCl<sub>3</sub>)

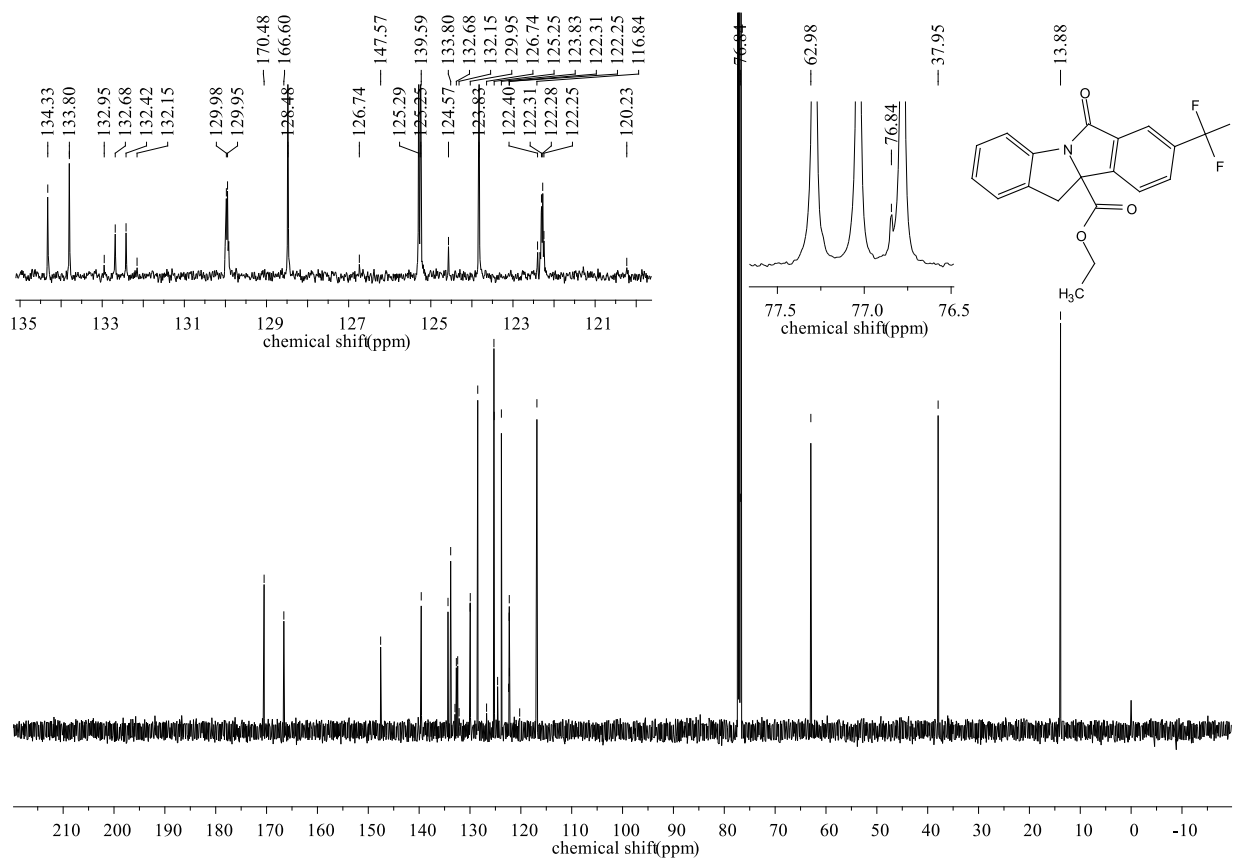

<sup>19</sup>F NMR Spectra of compound **36** (300 MHz, CDCl<sub>3</sub>)

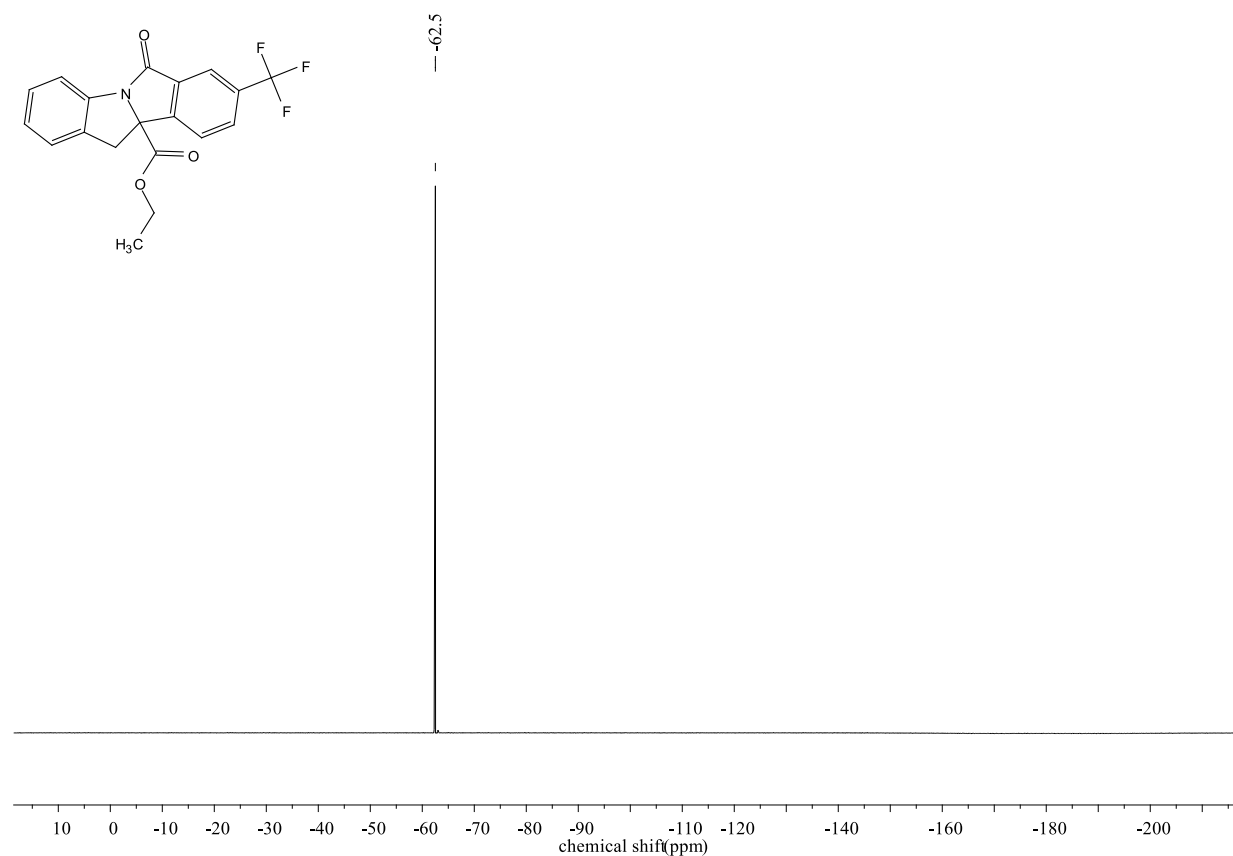

<sup>1</sup>H NMR Spectra of compound **37** (400 MHz, CDCl<sub>3</sub>)

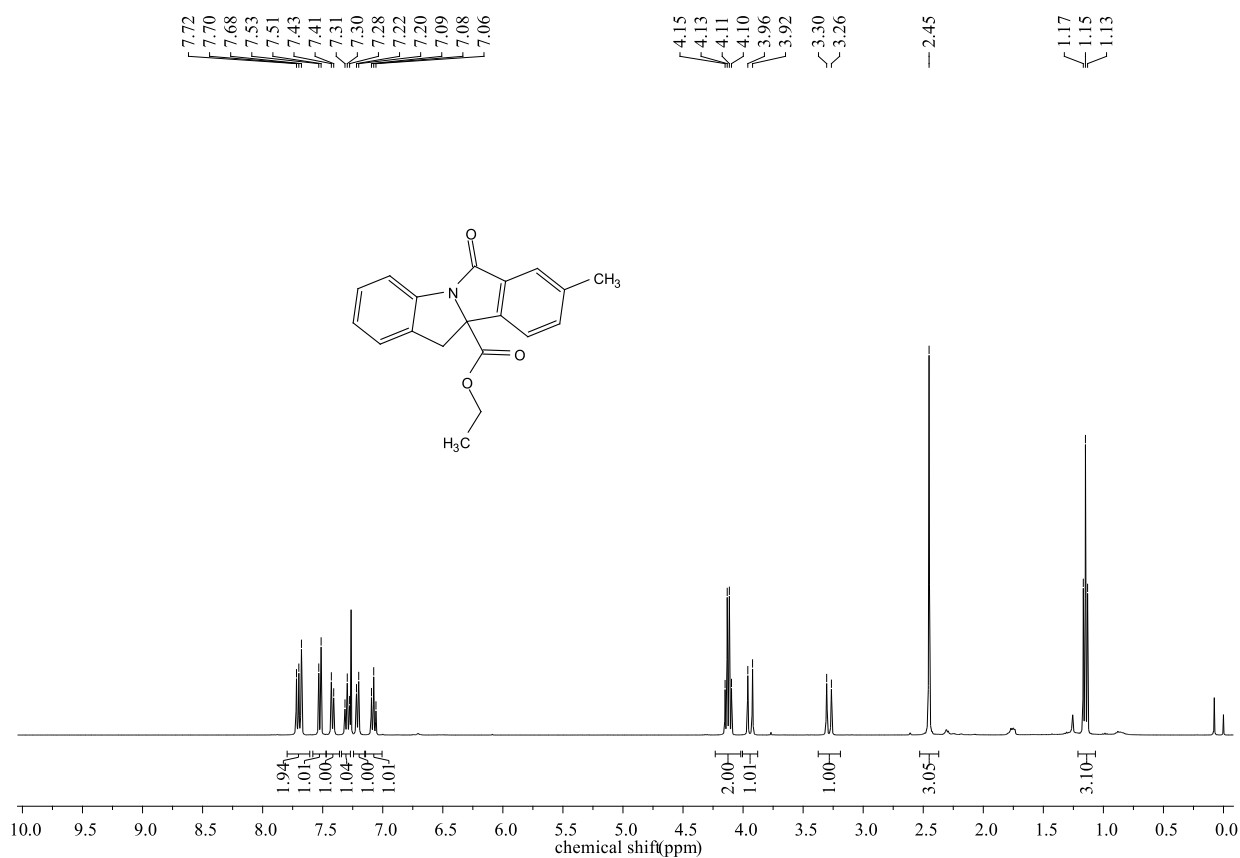

<sup>13</sup>C NMR Spectra of compound **37** (125 MHz, CDCl<sub>3</sub>)

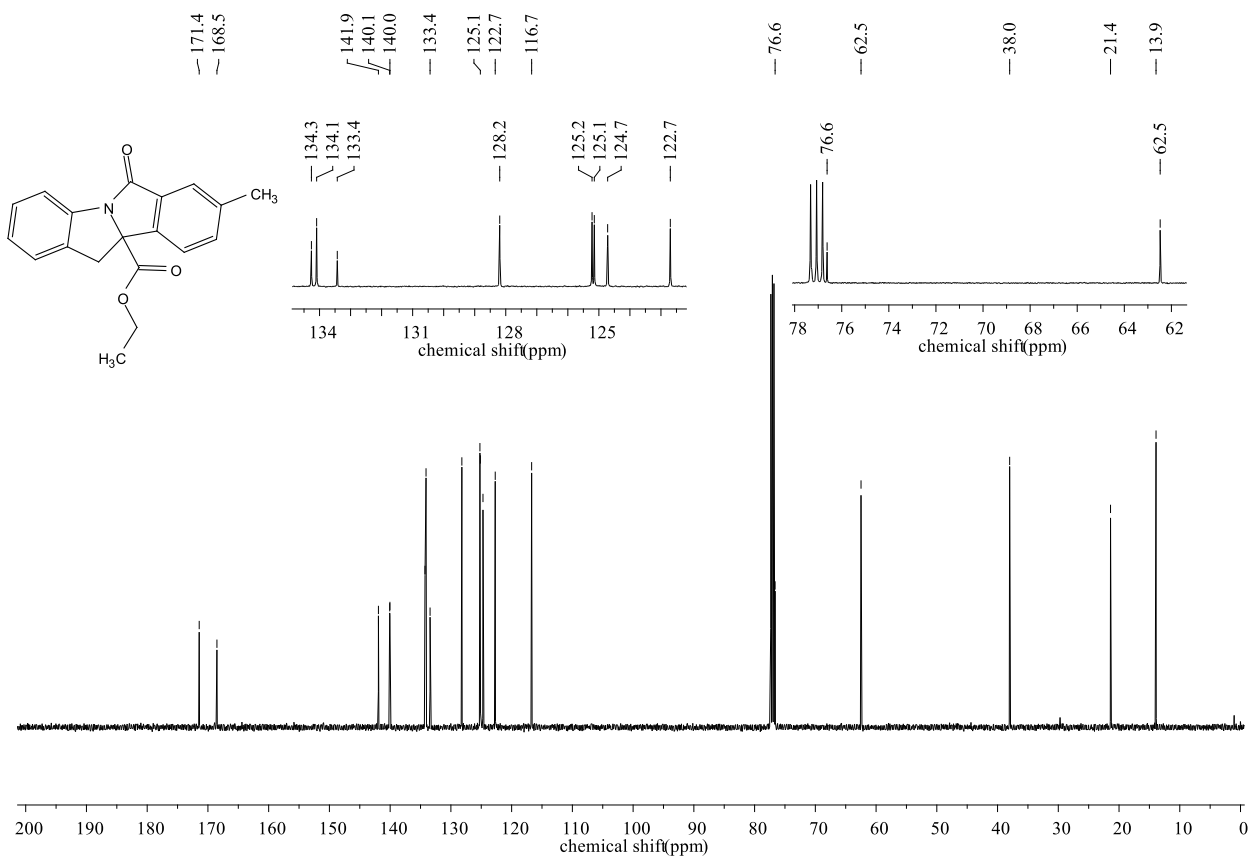

<sup>1</sup>H NMR Spectra of compound **38** (500 MHz, CDCl<sub>3</sub>)

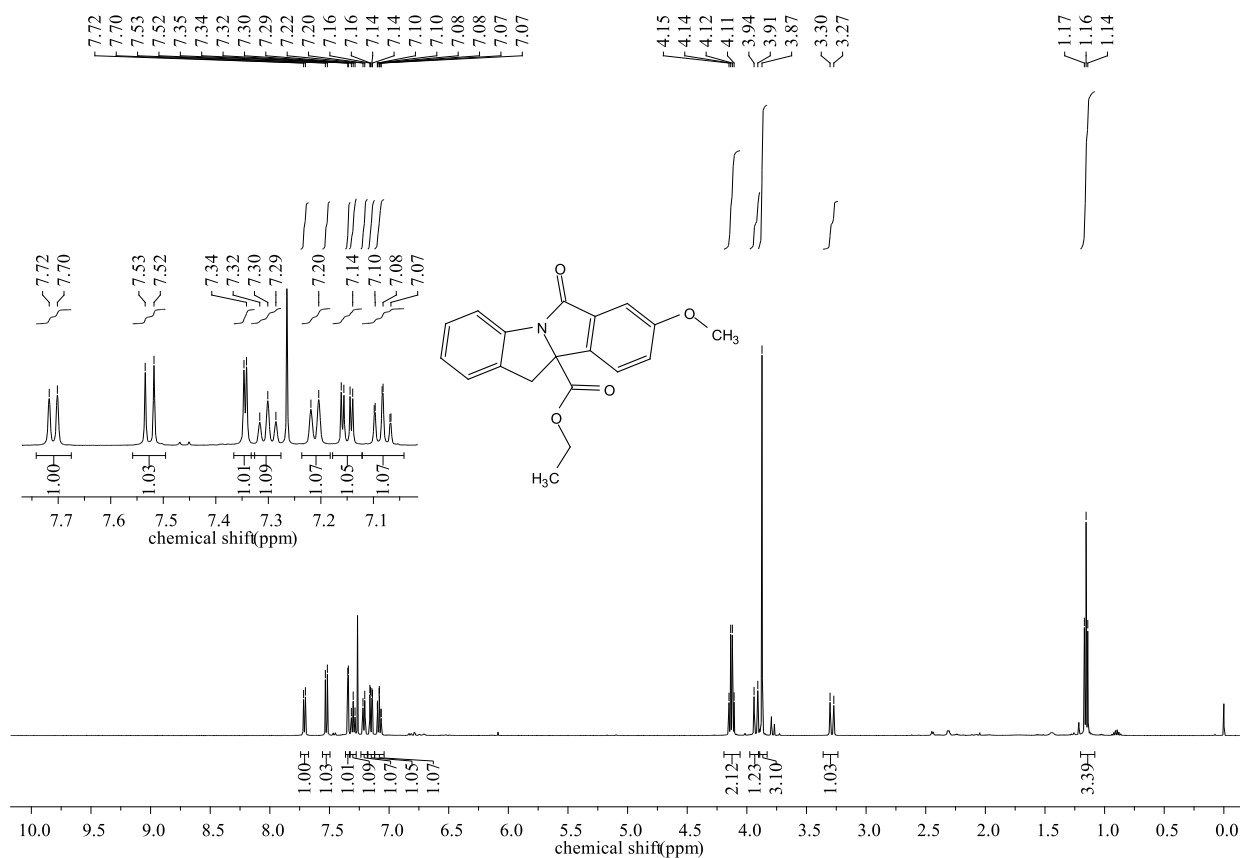

<sup>13</sup>C NMR Spectra of compound **38** (100 MHz, CDCl<sub>3</sub>)

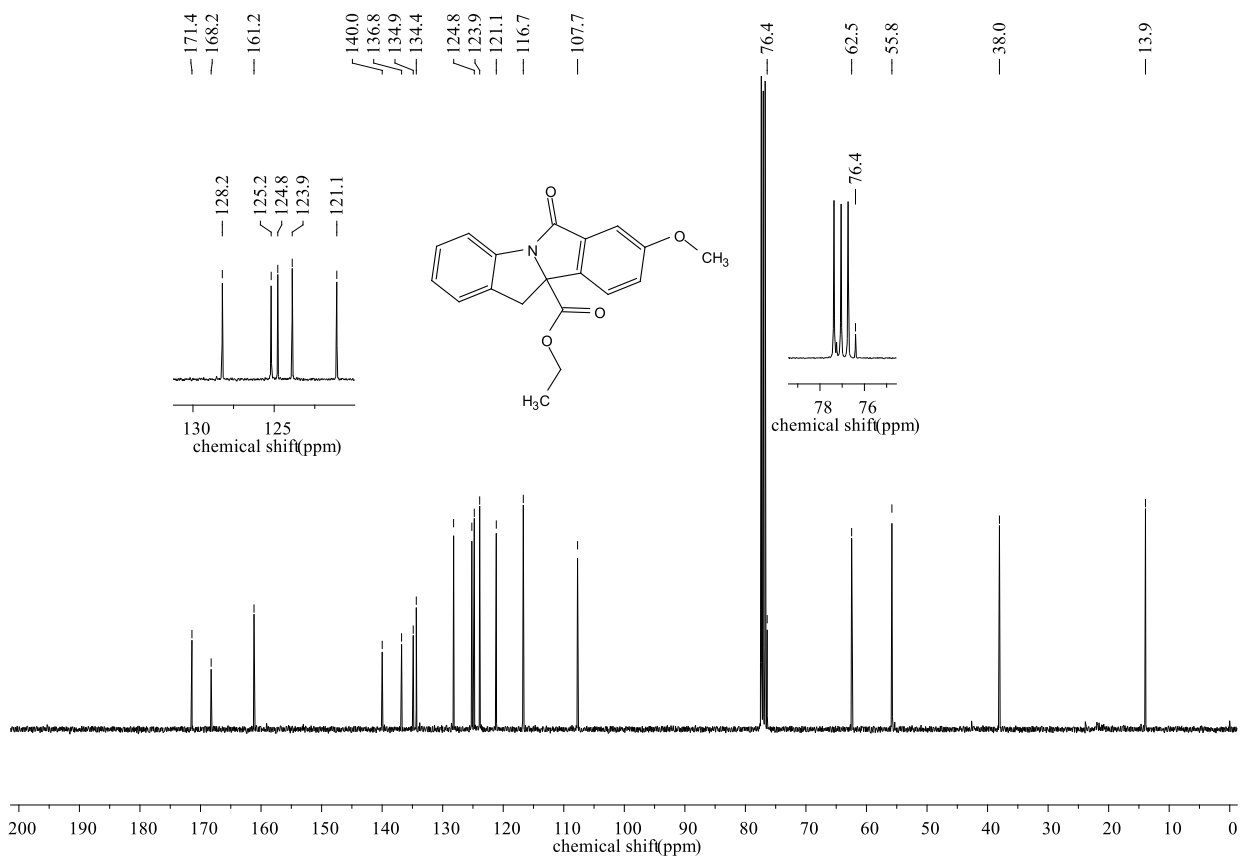

<sup>1</sup>H NMR Spectra of compound **39** (400 MHz, CDCl<sub>3</sub>)

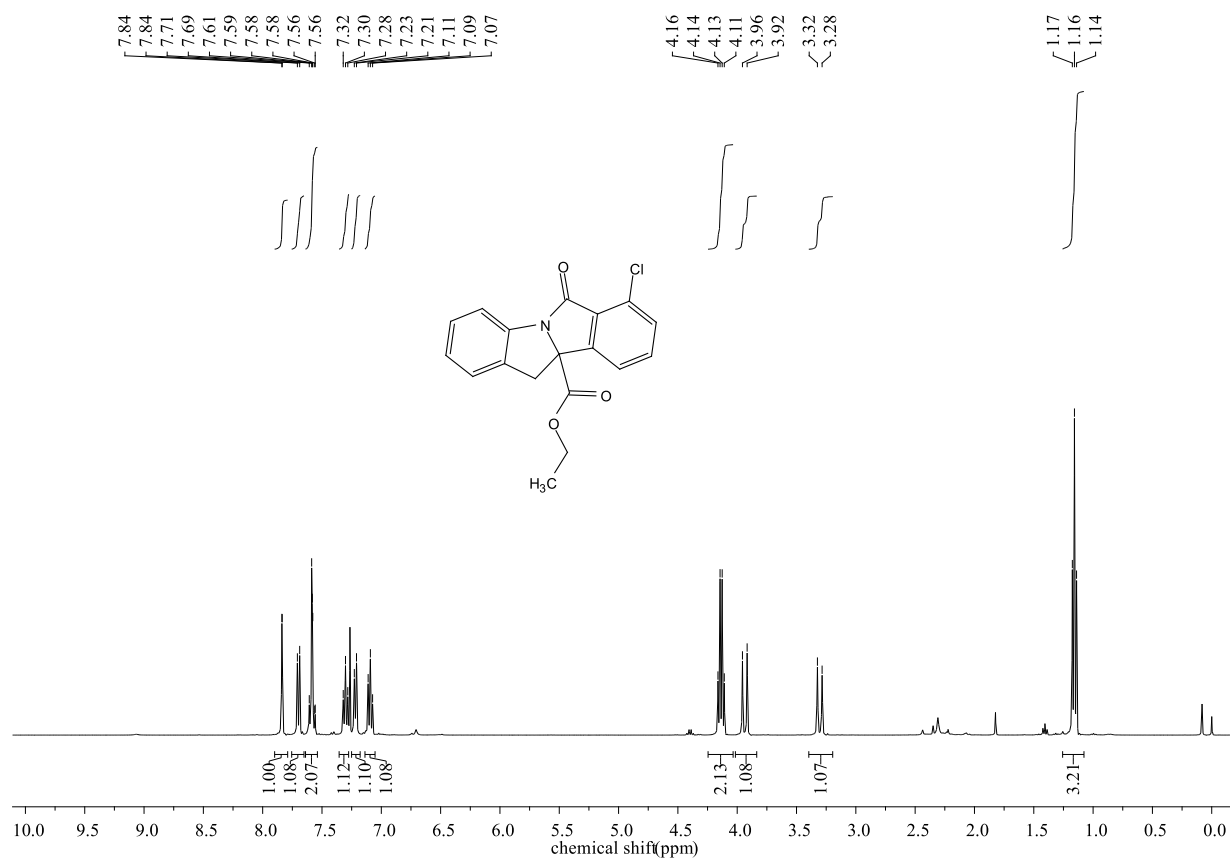

<sup>13</sup>C NMR Spectra of compound **39** (125 MHz, CDCl<sub>3</sub>)

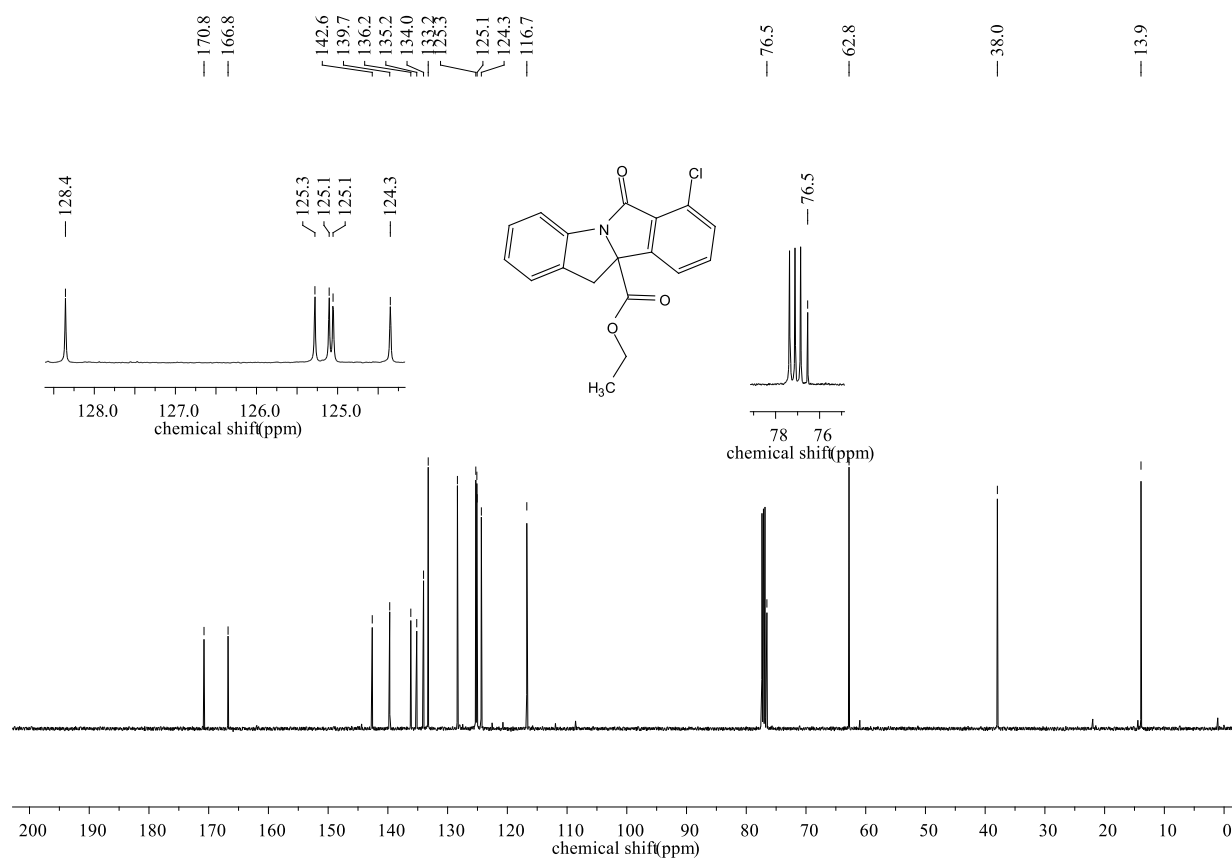

<sup>1</sup>H NMR Spectra of compound **40** (500 MHz, CDCl<sub>3</sub>)

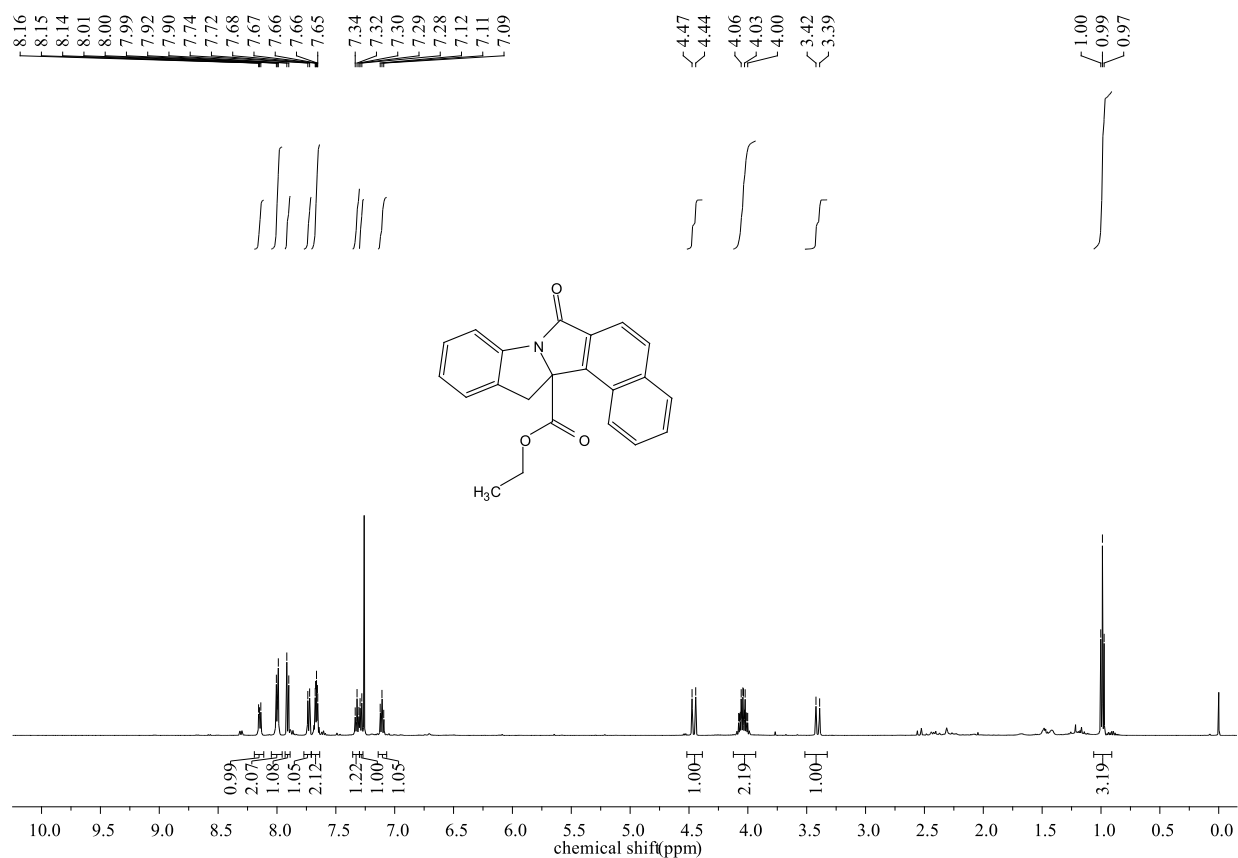

<sup>13</sup>C NMR Spectra of compound **40** (125 MHz, CDCl<sub>3</sub>)

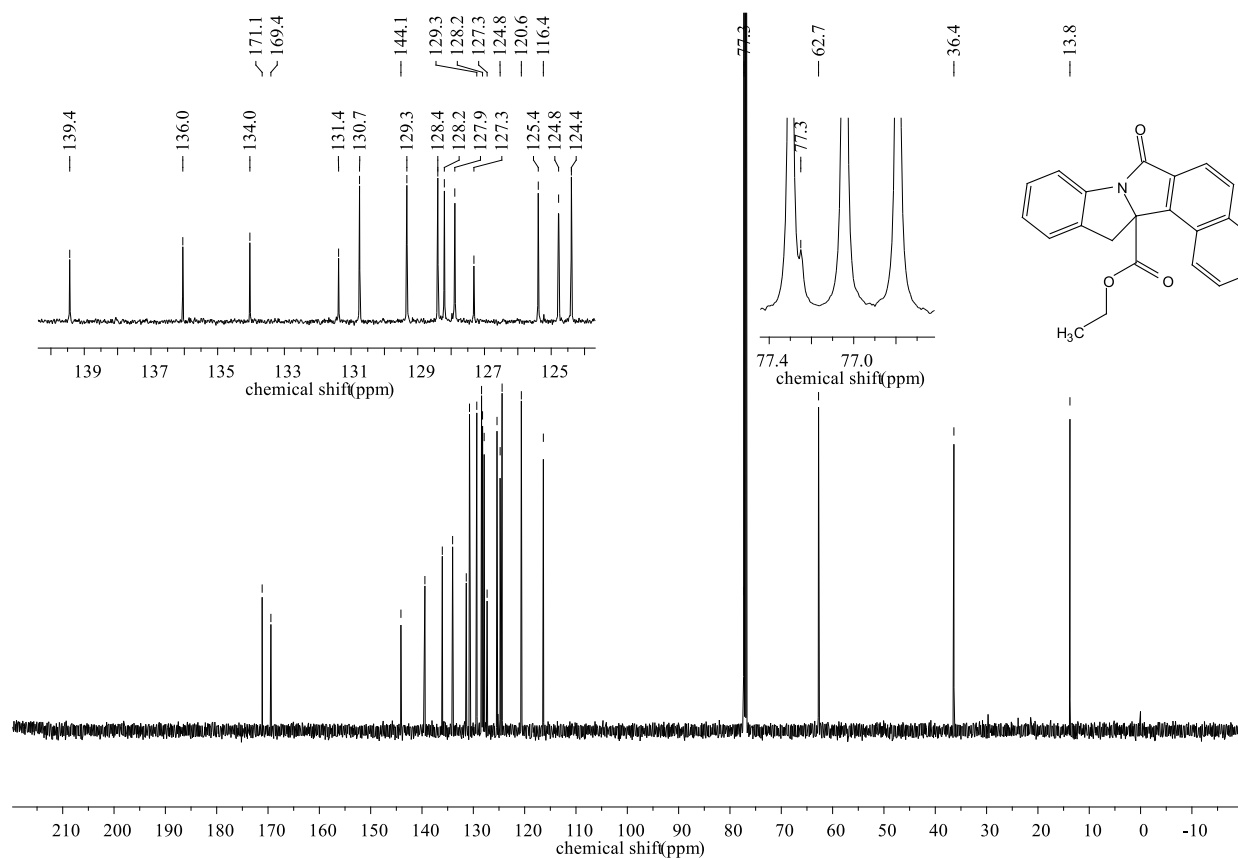

<sup>1</sup>H NMR Spectra of compound **41** (500 MHz, CDCl<sub>3</sub>)

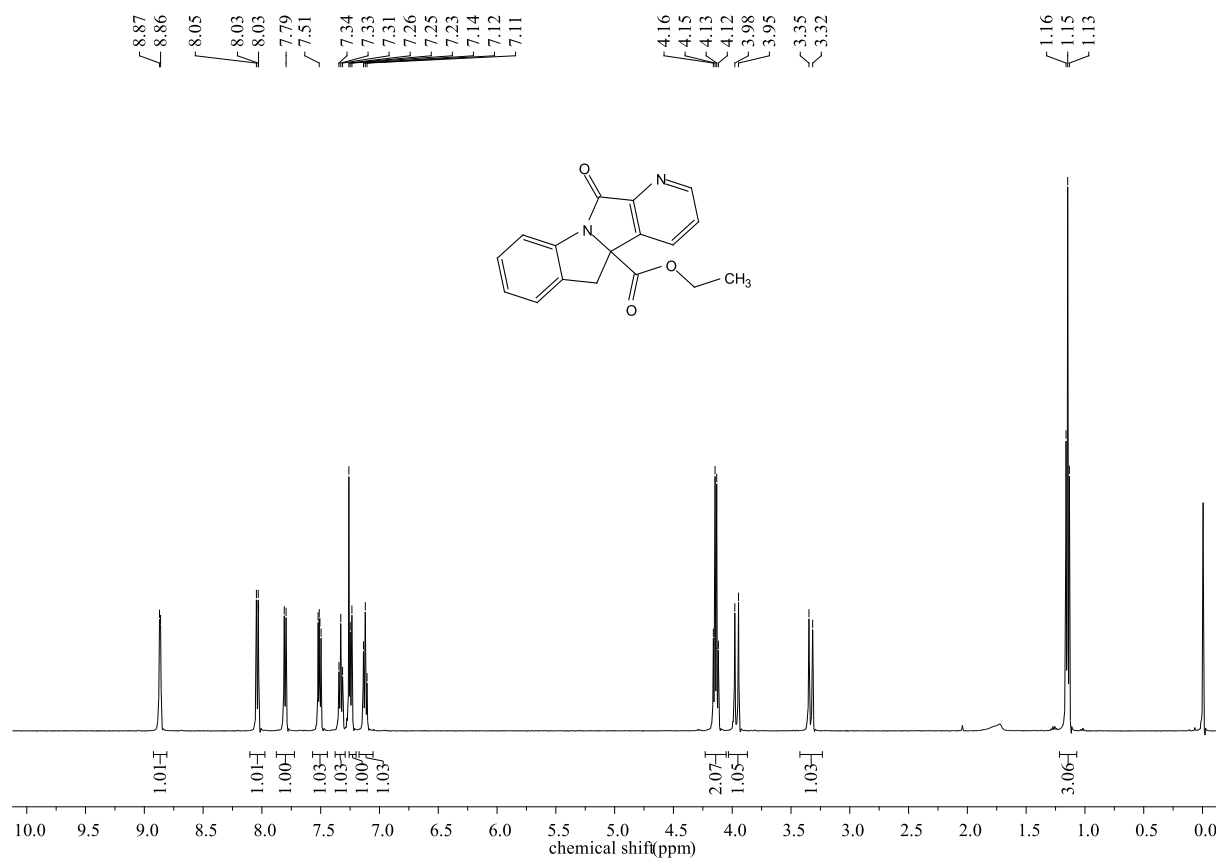

<sup>13</sup>C NMR Spectra of compound **41** (125 MHz, CDCl<sub>3</sub>)

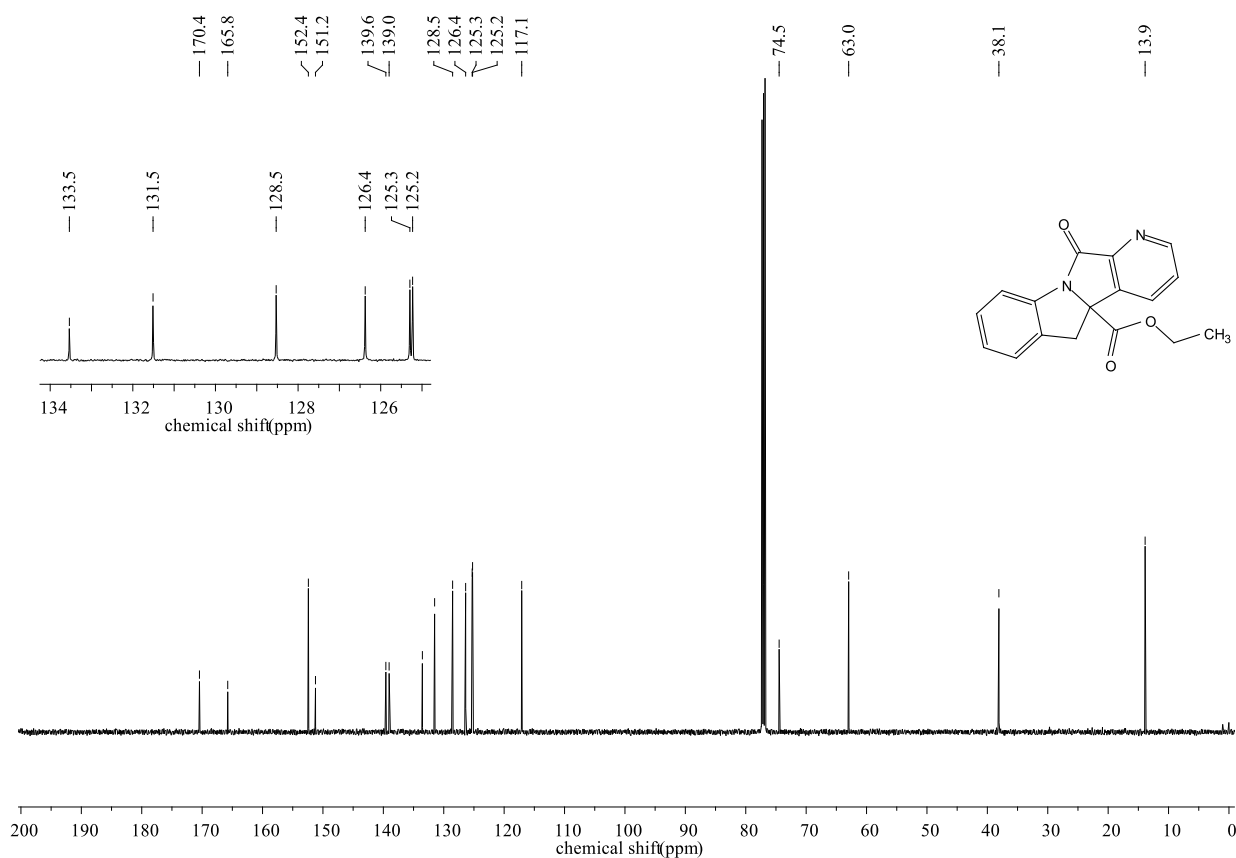

<sup>1</sup>H NMR Spectra of compound **42** (400 MHz, CDCl<sub>3</sub>)

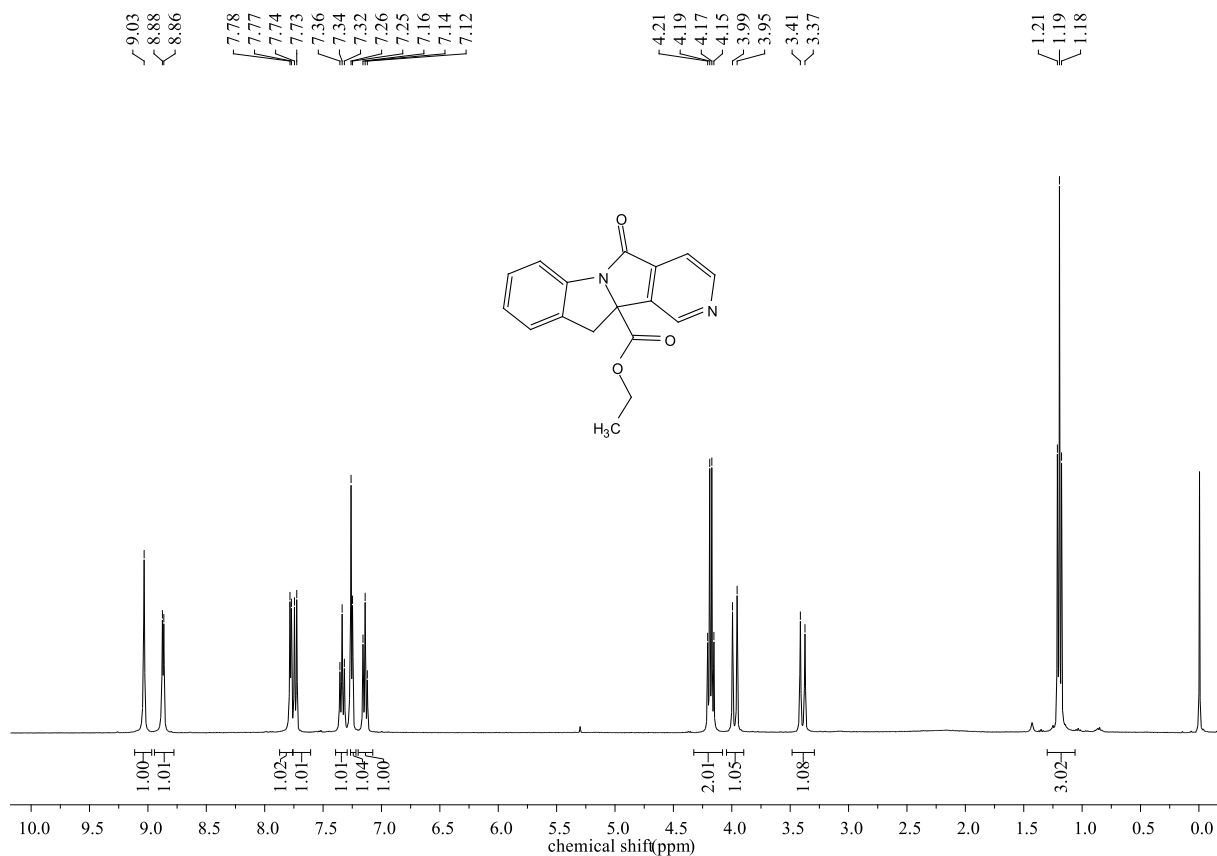

<sup>13</sup>C NMR Spectra of compound **42** (125 MHz, CDCl<sub>3</sub>)

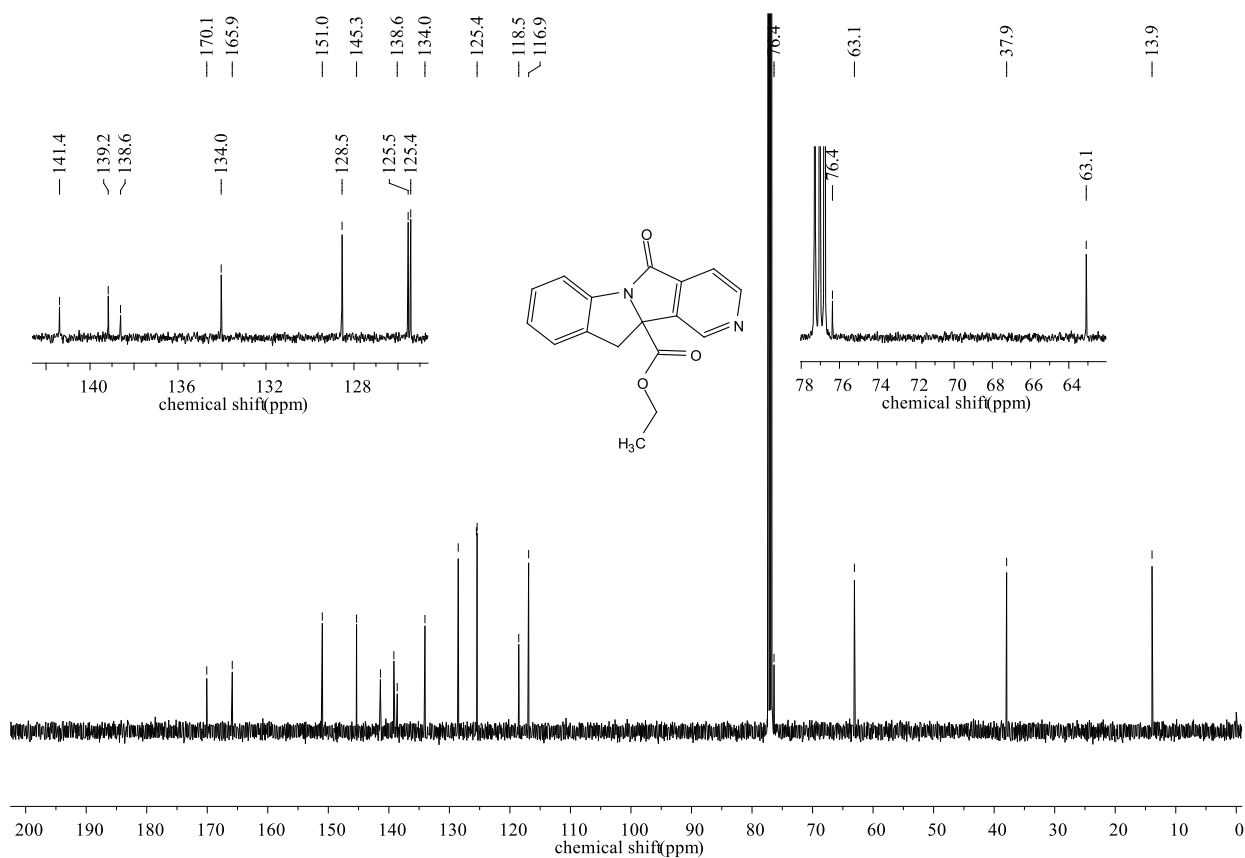

<sup>1</sup>H NMR Spectra of compound **45** (500 MHz, CDCl<sub>3</sub>)

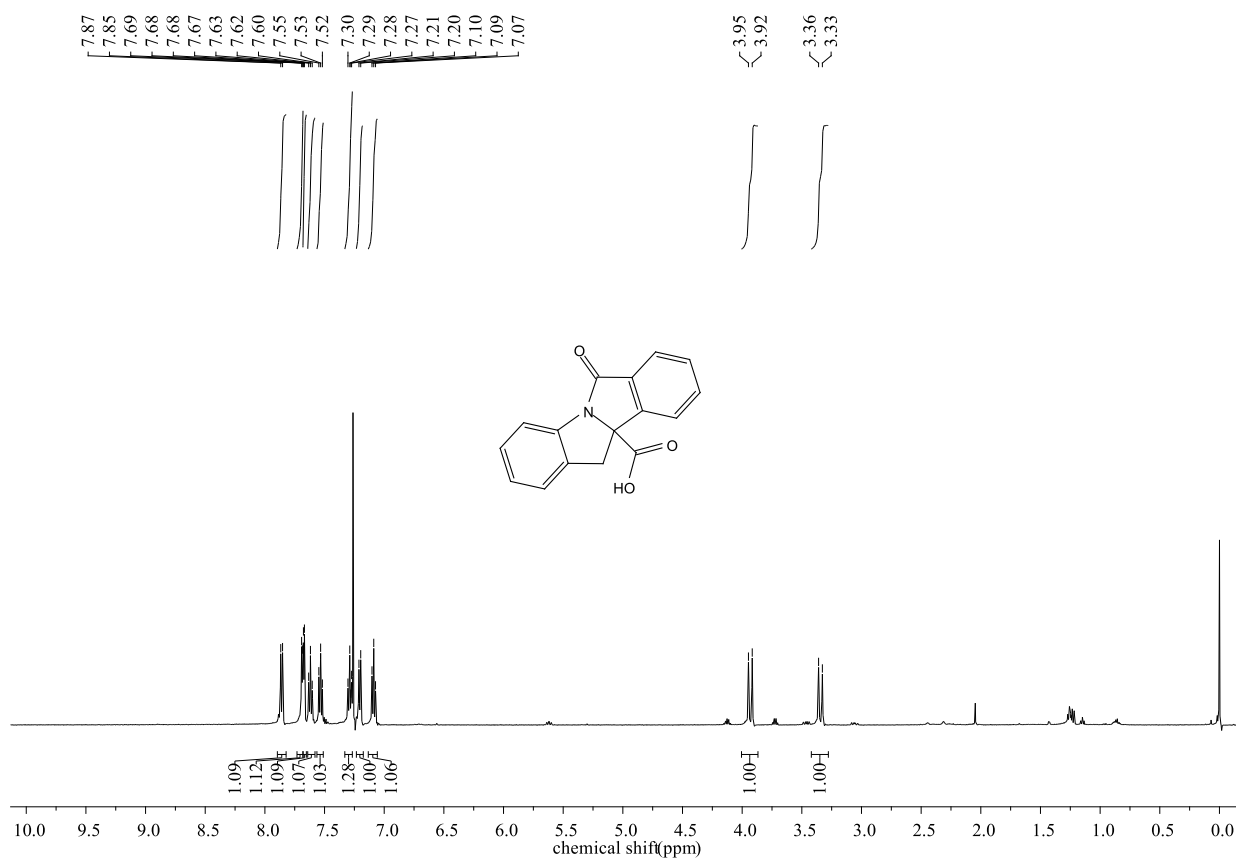

<sup>13</sup>C NMR Spectra of compound **45** (125 MHz, CDCl<sub>3</sub>)

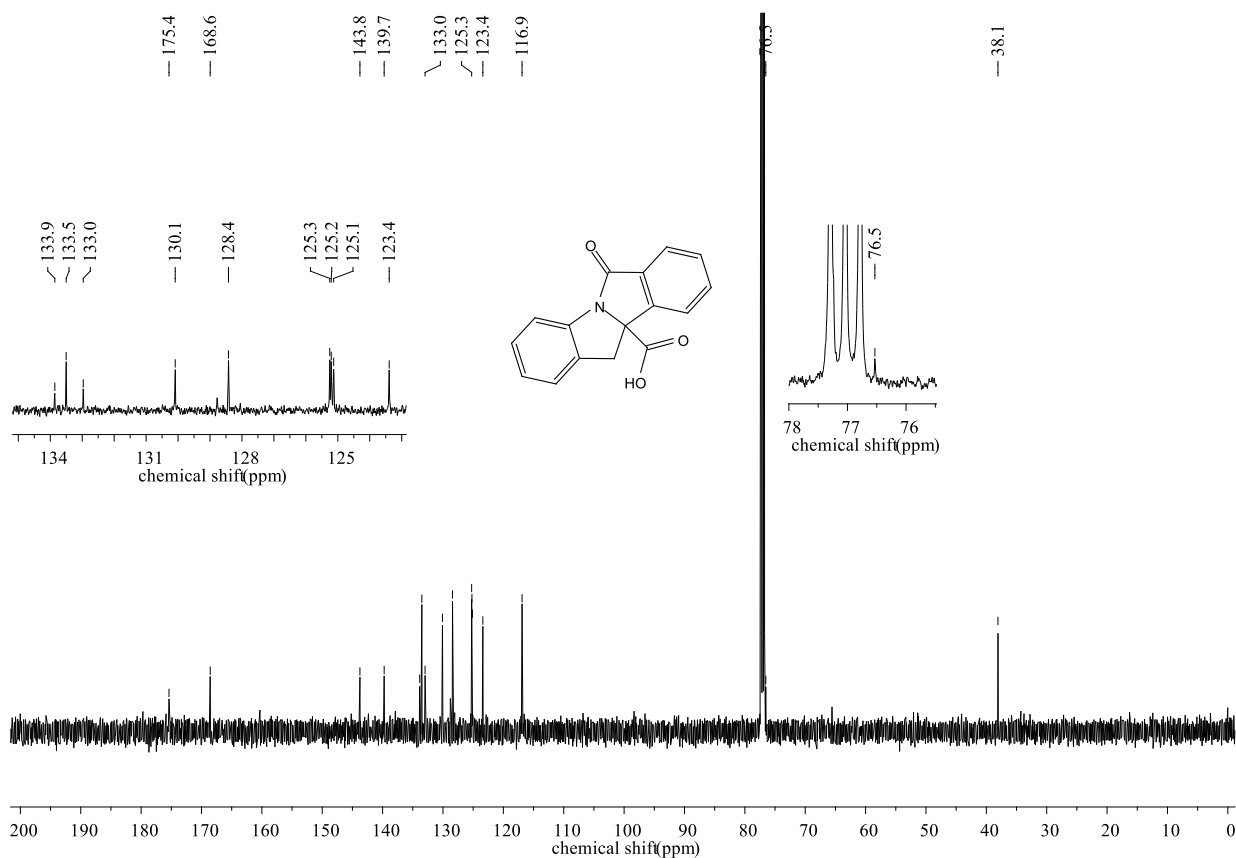

<sup>1</sup>H NMR Spectra of compound **46** (500 MHz, CDCl<sub>3</sub>)

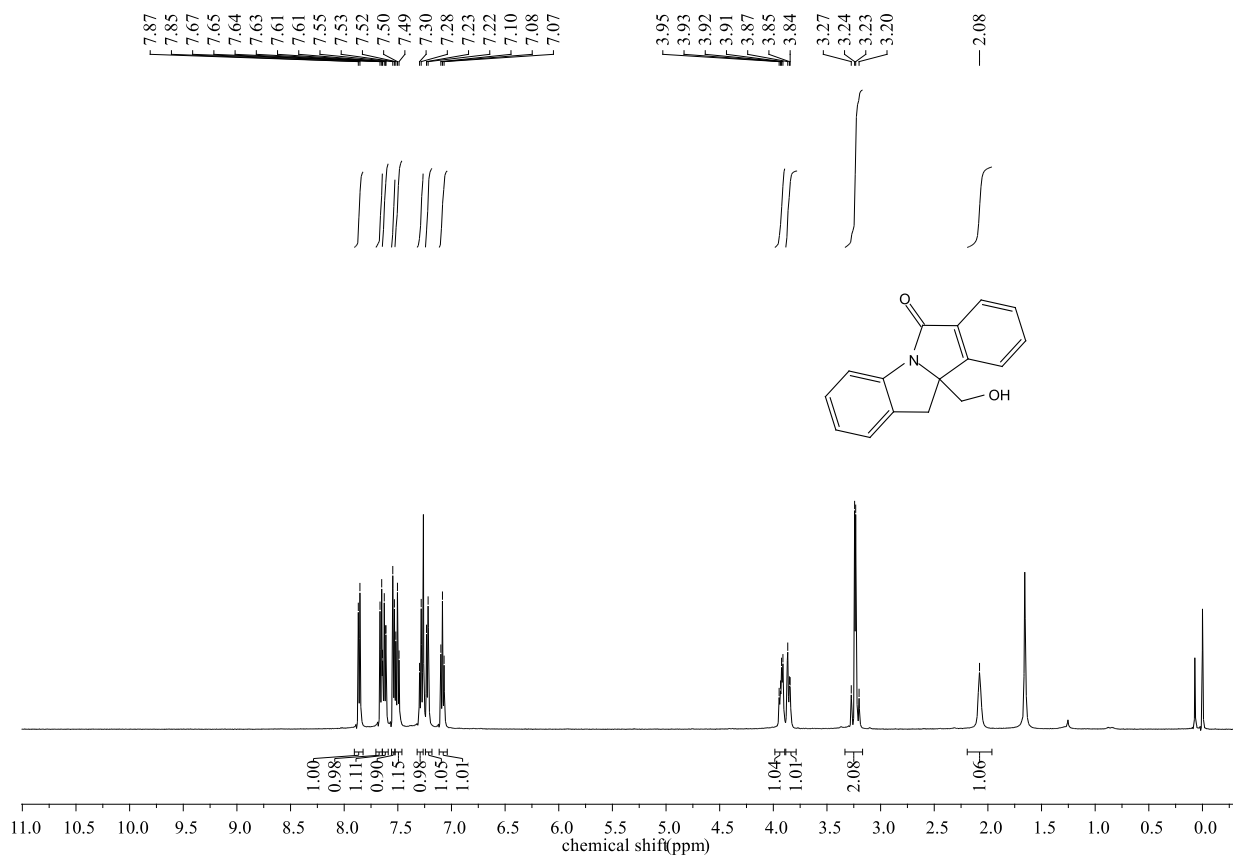

<sup>13</sup>C NMR Spectra of compound **46** (125 MHz, CDCl<sub>3</sub>)

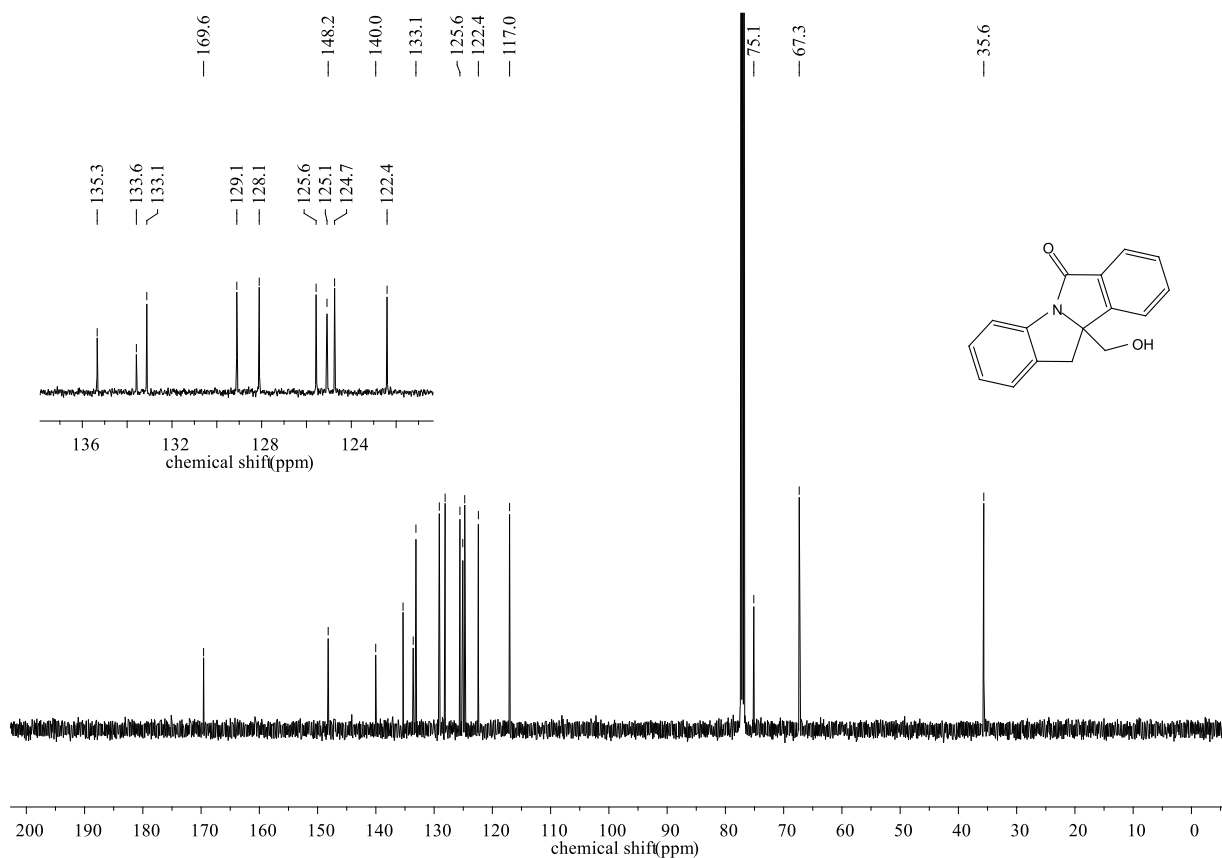

<sup>1</sup>H NMR Spectra of compound **47** (500 MHz, CDCl<sub>3</sub>)

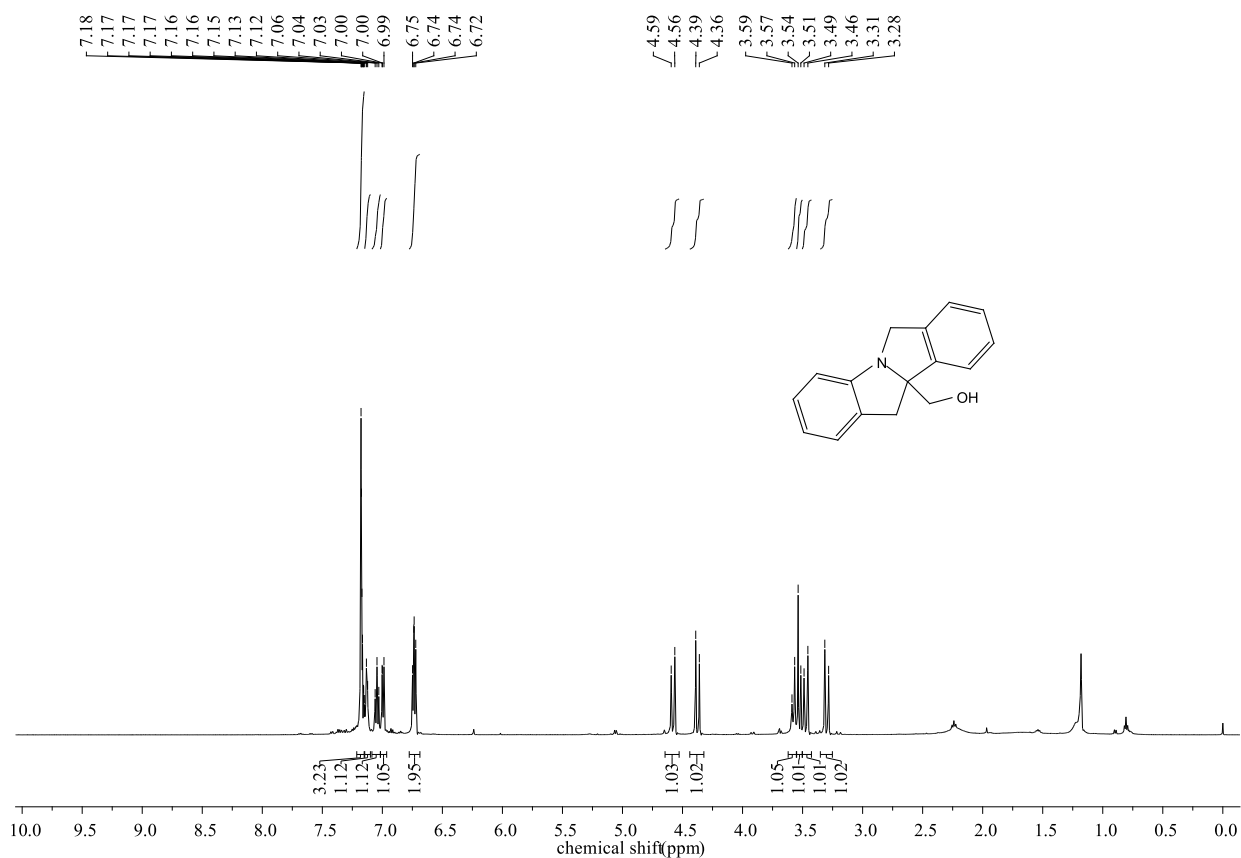

<sup>13</sup>C NMR Spectra of compound **47** (125 MHz, CDCl<sub>3</sub>)

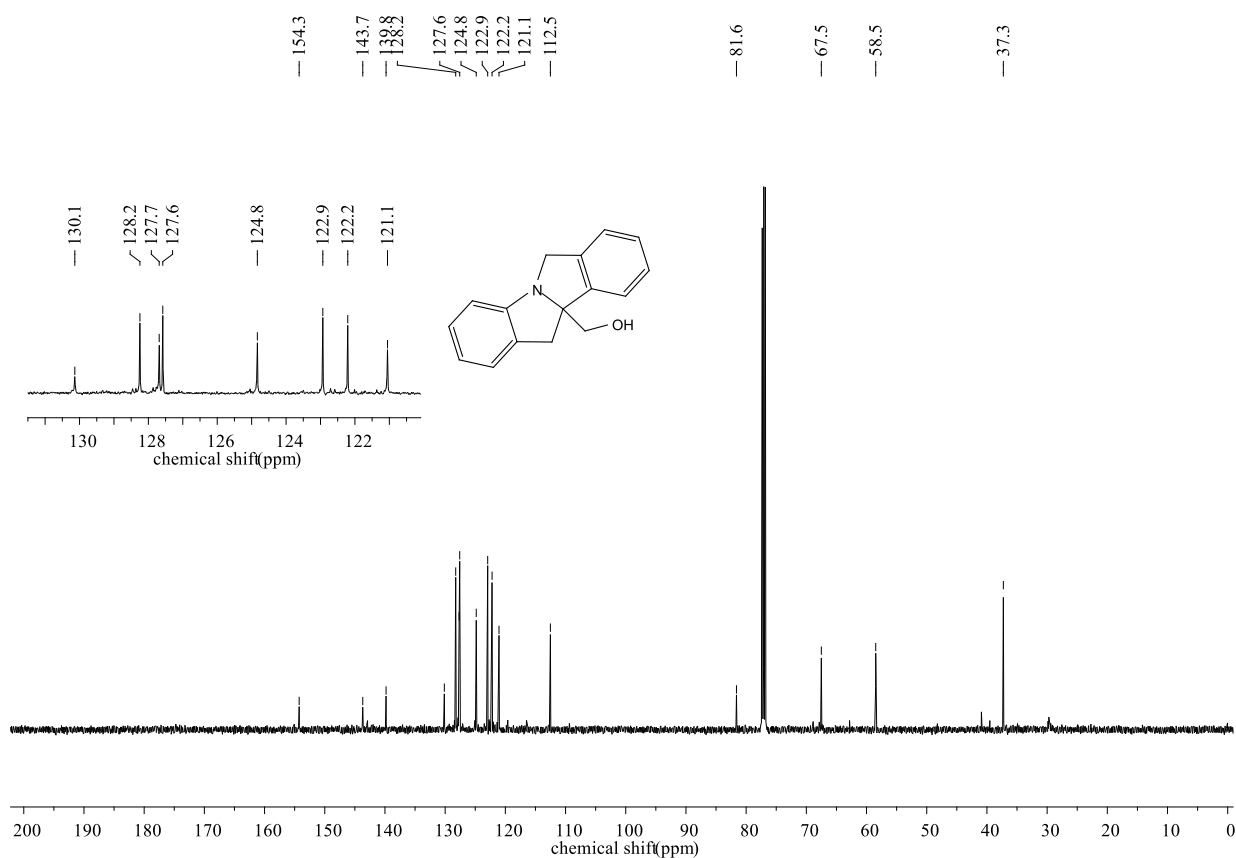

Supplement: d2qo02024f1.pdf [file d2qo02024f1.pdf]
